# Supplementary material for: A novel rGR–TiO2–ZrO2 composite nanosheet for capturing phosphopeptides from biosamples
Source: Royal Society of Chemistry journal article supplement (doi:10.1039/c4tb01899k), 2015-01-01

Table S1. Phosphopeptides peaks identified from tryptic digests of  $\alpha$ -casein and non-fat milk after captured by materials in MALDI- TOF/MS analysis.

| Peak Label       | Number of phosphorylation | Observed (m/z) | Peptide sequence                        | Type of material used |
|------------------|---------------------------|----------------|-----------------------------------------|-----------------------|
| $\alpha$ -casein |                           |                |                                         |                       |
| $\alpha_1$       | 1                         | 1237.267       | TVDME[pS]TEVF                           | (1)(2)(3)             |
| $\alpha_2$       | 1                         | 1253.142       | TVD[Mo]ME[pS]TEVF                       | (1) (3)               |
| $\alpha_3$       | 1                         | 1466.779       | TVDME [pS]TEVF <sup>TK</sup>            | (1)(2)(3)             |
| $\alpha_4$       | 1                         | 1482.654       | TVD[Mo]E[pS]TEVF <sup>TK</sup>          |                       |
| $\alpha_5$       | 2                         | 1538.978       | EQL[pS]T[pS]EENS <sup>KK</sup>          | (1)(2)(3)             |
| $\alpha_6$       | 1                         | 1660.949       | VPQLEIVPN[pS]AEER                       | (1)(2)(3)             |
| $\alpha_7$       | 1                         | 1833.197       | YLGEYLIVPN [pS]AEER                     | (1)(2)(3)             |
| $\alpha_8$       | 1                         | 1848.213       | DIGSE[pS]TEDQAMEDIK                     | (1)(2)(3)             |
| $\alpha_9$       | 1                         | 1864.366       | DIGSE[pS]TEDQA[Mo]EDIK                  | (1)                   |
| $\alpha_{10}$    | 2                         | 1927.885       | DIG[pS]E[pS]TEDQAMEDIK                  | (1)(2)(3)             |
| $\alpha_{11}$    | 2                         | 1943.829       | DIG[pS]E[pS]TEDQA[Mo]EDIK               | (1)(2)                |
| $\alpha_{12}$    | 1                         | 1952.109       | YKVPQLEIVPN[pS]AEER                     | (1)(2)(3)             |
| $\alpha_{13}$    | 1                         | 2080.00        | KKYKVPQLEIVPNpSAEERL                    |                       |
| $\alpha_{14}$    | 4                         | 2619.391       | NTMEHV[pS][pS][pS]EESII[pS]QETYK        |                       |
| $\alpha_{15}$    | 4                         | 2635.332       | NT[Mo]EHV[pS][pS][pS]EESII[pS]QETYK     |                       |
| $\alpha_{16}$    | 3                         | 2678.944       | VNEL[pS]KDIG[pS]E[pS]TEDQAMEDIK         |                       |
| $\alpha_{17}$    | 3                         | 2695.032       | VNEL[pS]KDIG[pS]E[pS]TEDQA[Mo]EDIK      |                       |
| $\alpha_{18}$    | 5                         | 2703.758       | Q*MEAE[pS]I[pS][pS] [pS]EEIVPN[pS]VEAQK | (1)(2)                |
| $\alpha_{19}$    | 5                         | 2720.822       | QMEAE[pS]I[pS][pS][pS]EEIVPNPN[pS]VEQK  | (1)(2)(3)             |
| $\alpha_{20}$    | 4                         | 2747.1         | NTMEHV[pS][pS][pS]EE[pS]IISQETYKQ       | (1)(2)(3)             |
| $\alpha_{21}$    | 3                         | 2936.202       | KEKVNEL[pS]KDIG[pS]E[pS]TEDQAMEDIKQ     | (1)                   |
| $\alpha_{22}$    | 4                         | 3008.618       | NANEEYSIG[pS][pS][pS]EE[pS]AEVATEEVK    | (1)                   |
| $\alpha_{23}$    | 5                         | 3088.415       | NANEEY[pS]IG[pS][pS][pS]EE[pS]AEVATEEVK | (1)                   |
| $\beta$ -casein  |                           |                |                                         |                       |
| $\beta_1$        | 1                         | 2061.985       | FQ[pS]EEQQQTEDELQDK                     | (1)(2)(3)             |
| $\beta_2$        | 1                         | 2432.434       | IEKFQ[pS]EEQQQTEDELQDK                  |                       |
| $\beta_3$        | 1                         | 2556.473       | FQ[pS]EEQQQTEDELQDKIHPF                 | (1)(3)                |
| $\beta_4$        | 4                         | 3122.746       | RELEELNVPGEI[pS]L[pS][pS][pS]EESITR     | (1)(3)                |

[pS]: Phosphorylated site; [Mo]: oxidation on methionine; \*: Pyroglutamylation on the N-terminal Q;  
Tryptic digests of non-fat milk was captured by (1) rGTZ; (2) rGT; (3) rGZ.

Fig. E1 MALDI-TOF/MS spectra of tryptic  $\beta$ -casein digest after enrichment by rGTZ using TFA in incubation with different contents of (A) 0.1%; (B) 0.5%; (C) 1%. The metastable losses of phosphoric acid were labeled by M\*.

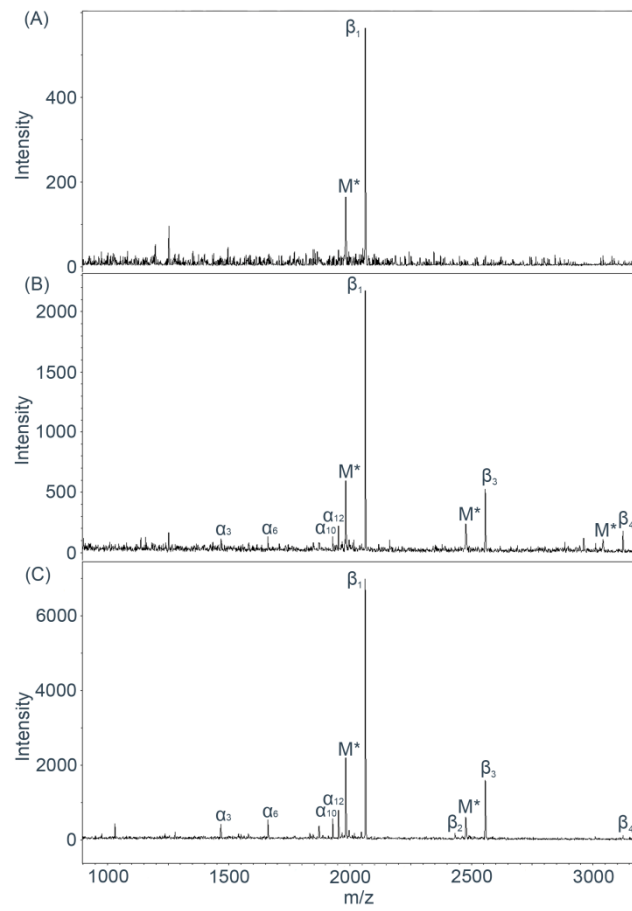

Fig. E2 MALDI-TOF/MS spectra of tryptic  $\beta$ -casein digest after enrichment by rGTZ using  $\text{NH}_3 \cdot \text{H}_2\text{O}$  in eluent with different contents of (A) 5%; (B) 10%; (C) 15%. The metastable losses of phosphoric acid were labeled by  $\text{M}^*$ .

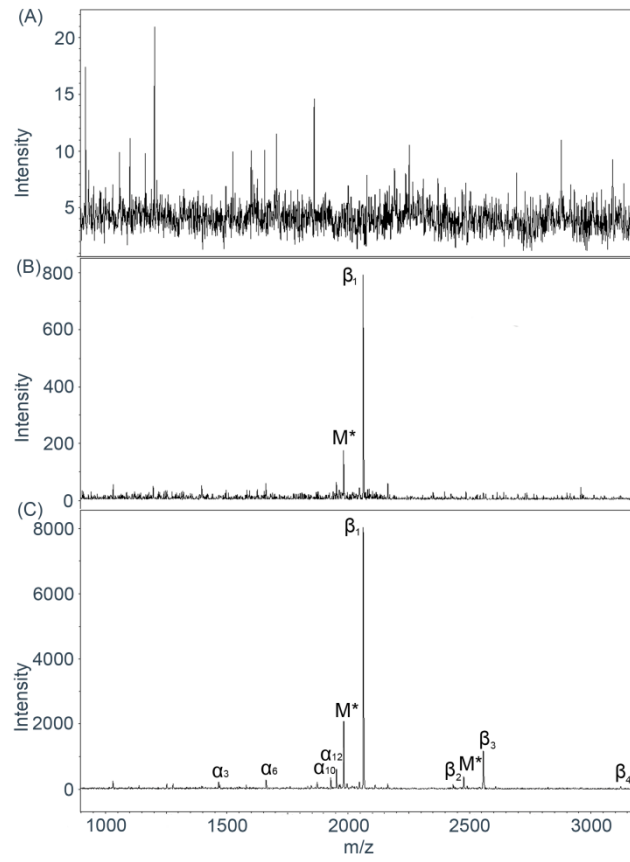

Fig. E3 MALDI-TOF/MS spectra of tryptic digest of  $\alpha$ -casein without enrichment (A); enriched by rGTZ (B). The metastable losses of phosphoric acid were labeled by M\*.

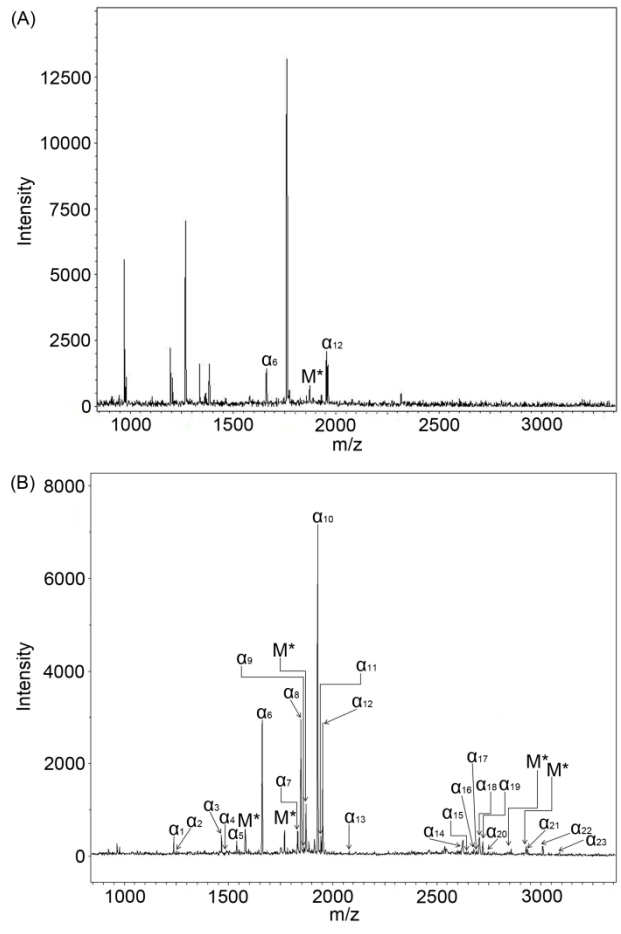

Supplement: c4tb01899k1.pdf [file c4tb01899k1.pdf]
