# Supplementary material for: A novel rGR–TiO2–ZrO2 composite nanosheet for capturing phosphopeptides from biosamples
Source: Royal Society of Chemistry journal article supplement (doi:10.1039/c4tb01899k), 2015-01-01
Supplement: c4tb01899k2.xlsx [file c4tb01899k2.xlsx]

## Sheet: sheet1-rGTZ
Phosphopeptide identifications in mouse brain.Protein and phosphorylation site identification was performed by MaxQuant with integrated Andromeda search engine (v. 1.3.0.5). Tandem mass spectra were searched against Uniprot mouse reference proteome database (44455 sequences) concatenated with reverse decoy database and protein sequences of common contaminants. Trypsin/P was specified as cleavage …
Protein	Protein name	Gene name	Localization prob	Number of Phospho (STY)	Amino acid	PEP	Phospho (STY) Probabilities	Modified sequence	Charge	m/z	Position
A0A087WNU5			1	1	S	0.00119605	LNDELQS(1)PEKKPR	_LNDELQS(ph)PEKKPR_	3	545.27	1316
A0A087WQ39	IQ motif and SEC7 domain-containing protein 1	Iqsec1	1	1	S	3.12938e-05	MQFS(1)FEGPEK	_MQFS(ph)FEGPEK_	2	640.257	179
A0A087WSJ2	Calcium-activated potassium channel subunit alpha-1	Kcnma1	1	1;2	S	0.000634187	RLEDEQPPT(1)LS(1)PK	_RLEDEQPPT(ph)LS(ph)PK_	2	835.365	711
Q8K019	Bcl-2-associated transcription factor 1	Bclaf1	1	1	S	3.4159e-125	FHDS(1)EGDDTEETEDYR	_FHDS(ph)EGDDTEETEDYR_	2	1012.86	395
P63166	Small ubiquitin-related modifier 1	Sumo1	1	1	S	1.02706e-21	S(1)DQEAKPSTEDLGDKK	_(ac)S(ph)DQEAKPSTEDLGDKK_	2	935.409	2
Q80XU3	Nuclear ubiquitous casein and cyclin-dependent kinase substrate 1	Nucks1	1	1	S	1.95447e-66	VVDYSQFQES(1)DDADEDYGR	_VVDYSQFQES(ph)DDADEDYGR_	2	1159.44	19
Q80XU3	Nuclear ubiquitous casein and cyclin-dependent kinase substrate 1	Nucks1	1	1	S	8.56836e-79	TPSPKEEDEEAES(1)PPEKK	_TPSPKEEDEEAES(ph)PPEKK_	2	1053.96	214
A0A087WS83	Voltage-dependent R-type calcium channel subunit alpha-1E	Cacna1e	1	1	S	2.07373e-07	S(1)LDEGVSVEGEKEHEPHSSHR	_S(ph)LDEGVSVEGEKEHEPHSSHR_	4	607.016	948
A0A087WS83	Voltage-dependent R-type calcium channel subunit alpha-1E	Cacna1e	1	1	S	3.94858e-58	TDGEAS(1)PLKEAETKEEEEEVEK	_TDGEAS(ph)PLKEAETKEEEEEVEK_	3	853.041	1099
A0JNY3	Gephyrin	Gphn	1	2;3	S	6.81613e-13	VKEVHDELEDLPS(1)PPPPLS(0.997)PPPT(0.002)T(0.001)SPHK	_VKEVHDELEDLPS(ph)PPPPLS(ph)PPPTTSPHK_	3	1067.5	188
A2A5Y6	Microtubule-associated protein	Mapt	1	1;2;3	S	5.78929e-71	TDHGAEIVYKS(1)PVVSGDT(0.22)S(0.78)PR	_TDHGAEIVYKS(ph)PVVSGDTS(ph)PR_	2	1188.02	704
A2A699	Protein FAM171A2	Fam171a2	1	1;2;3	S	1.97767e-12	RDS(1)LT(1)S(1)PEDELGAEVGDEAGDKK	_RDS(ph)LT(ph)S(ph)PEDELGAEVGDEAGDKK_	3	886.68	785
A2A699	Protein FAM171A2	Fam171a2	1	3	S	2.29557e-05	RDS(1)LT(1)S(1)PEDELGAEVGDEAGDKK	_RDS(ph)LT(ph)S(ph)PEDELGAEVGDEAGDKK_	3	886.68	788
Q52KI8	Serine/arginine repetitive matrix protein 1	Srrm1	1	1	S	0.00033394	APKPEPVPEPKEPS(1)PEK	_APKPEPVPEPKEPS(ph)PEK_	3	645.987	260
Q52KI8	Serine/arginine repetitive matrix protein 1	Srrm1	1	1	S	3.20845e-06	EKS(1)PELPEPSVR	_EKS(ph)PELPEPSVR_	2	724.345	220
Q52KI8	Serine/arginine repetitive matrix protein 1	Srrm1	1	1;2	S	1.5409e-75	KET(1)ES(1)EAEDDNLDDLER	_KET(ph)ES(ph)EAEDDNLDDLER_	3	723.27	915
Q52KI8	Serine/arginine repetitive matrix protein 1	Srrm1	1	2;3	S	0.000746097	RLS(1)PS(1)AS(1)PPR	_RLS(ph)PS(ph)AS(ph)PPR_	2	654.251	387
Q52KI8	Serine/arginine repetitive matrix protein 1	Srrm1	1	3	S	0.00347309	RLS(1)PS(1)AS(1)PPR	_RLS(ph)PS(ph)AS(ph)PPR_	2	654.251	389
Q52KI8	Serine/arginine repetitive matrix protein 1	Srrm1	1	2;3	S	0.000746097	RLS(1)PS(1)AS(1)PPR	_RLS(ph)PS(ph)AS(ph)PPR_	2	654.251	391
Q52KI8	Serine/arginine repetitive matrix protein 1	Srrm1	1	2	S	4.60934e-05	RS(1)PS(1)PAPPPPPPPPPPR	_RS(ph)PS(ph)PAPPPPPPPPPPR_	2	950.947	572
Q52KI8	Serine/arginine repetitive matrix protein 1	Srrm1	1	2	S	4.60934e-05	RS(1)PS(1)PAPPPPPPPPPPR	_RS(ph)PS(ph)PAPPPPPPPPPPR_	2	950.947	574
A2AEG6	Neuronal membrane glycoprotein M6-b	Gpm6b	1	1	S	6.49484e-09	AKEEQELQDIQS(1)R	_AKEEQELQDIQS(ph)R_	2	827.378	318
A2AGQ4	MAP kinase-activating death domain protein	Madd	1	1	S	2.64312e-10	S(1)LKEENFVASVELWNK	_S(ph)LKEENFVASVELWNK_	2	986.974	1109
P41234	ATP-binding cassette sub-family A member 2	Abca2	1	1;2	S	1.79233e-28	VSEEDQS(1)LENS(1)EADVK	_VSEEDQS(ph)LENS(ph)EADVK_	2	969.866	1327
P41234	ATP-binding cassette sub-family A member 2	Abca2	1	2	S	4.912e-21	VSEEDQS(1)LENS(1)EADVK	_VSEEDQS(ph)LENS(ph)EADVK_	2	969.866	1331
A2ANY6	Midasin	Mdn1	1	1	S	1.04994e-07	HQDEKEDS(1)EPEDVEQGQEK	_HQDEKEDS(ph)EPEDVEQGQEK_	3	779.311	4827
A2AP18	1-phosphatidylinositol 4,5-bisphosphate phosphodiesterase eta-2	Plch2	1	1	S	1.19738e-80	VAS(1)VEEGDETLDSPGSQSR	_VAS(ph)VEEGDETLDSPGSQSR_	2	1021.93	676
Q9D6Z1	Nucleolar protein 56	Nop56	1	1	S	2.47848e-11	APKEELAS(1)DLEEMATSSAK	_APKEELAS(ph)DLEEMATSSAK_	3	696.313	513
Q9D6Z1	Nucleolar protein 56	Nop56	1	1;2	S	1.77229e-57	SSPKEEVAS(1)EPEEAASPTTPK	_SSPKEEVAS(ph)EPEEAASPTTPK_	2	1126	536
Q99JP7	Gamma-glutamyltransferase 7	Ggt7	1	1;2	S	2.63958e-49	LPSSSSEMGS(1)QDGS(1)PLR	_LPSSSSEMGS(ph)QDGS(ph)PLR_	2	947.868	83
A2AQN4	Acetyl-coenzyme A synthetase, cytoplasmic	Acss2	1	1	S	0.0434175	GWS(1)PPPEVR	_GWS(ph)PPPEVR_	2	552.747	30
A2AR02	Peptidyl-prolyl cis-trans isomerase G	Ppig	1	2	S	0.0159699	S(1)ET(1)PPHWR	_S(ph)ET(ph)PPHWR_	2	585.212	354
A2ARP8	Microtubule-associated protein 1A	Mtap1a	1	1	S	4.74451e-115	AELEEMEEVHPS(1)DEEEEETK	_AELEEMEEVHPS(ph)DEEEEETK_	2	1234.98	905
A2ARP8	Microtubule-associated protein 1A	Mtap1a	1	1	S	4.29415e-25	ALGLEES(1)PEEEGKAR	_ALGLEES(ph)PEEEGKAR_	3	565.593	1844
A2ARP8	Microtubule-associated protein 1A	Mtap1a	1	2	S	7.2635e-107	ELALS(1)S(1)PEDLTQDFEELK	_ELALS(ph)S(ph)PEDLTQDFEELK_	2	1112.47	764
A2ARP8	Microtubule-associated protein 1A	Mtap1a	1	2	S	7.2635e-107	ELALS(1)S(1)PEDLTQDFEELK	_ELALS(ph)S(ph)PEDLTQDFEELK_	2	1112.47	765
A2ARP8	Microtubule-associated protein 1A	Mtap1a	1	1	S	1.15083e-32	EMTLDQKS(1)PEKAK	_EMTLDQKS(ph)PEKAK_	2	792.871	1818
A2ARP8	Microtubule-associated protein 1A	Mtap1a	1	1;2	S	3.85131e-22	GEPVPAWEGKS(1)PEQEVR	_GEPVPAWEGKS(ph)PEQEVR_	3	658.97	1886
A2ARP8	Microtubule-associated protein 1A	Mtap1a	1	1	S	4.4734e-17	WLAES(1)PVGLPPEEEDKLTR	_WLAES(ph)PVGLPPEEEDKLTR_	3	749.363	1985
A2ARS0	Ankyrin repeat domain-containing protein 63	Ankrd63	1	2	S	2.12636e-60	GSNSDS(1)PPGHPAPAPS(1)PERR	_GSNSDS(ph)PPGHPAPAPS(ph)PERR_	3	724.967	203
Q08943	FACT complex subunit SSRP1	Ssrp1	1	1	S	1.30591e-27	EGINPGYDDYADS(1)DEDQHDAYLER	_EGINPGYDDYADS(ph)DEDQHDAYLER_	3	956.37	444
A2AWR3		Gpr155	1	2	S	1.32237e-05	FLQKS(1)PEQS(1)PPAR	_FLQKS(ph)PEQS(ph)PPAR_	2	822.863	835
A2AWR3		Gpr155	1	2	S	1.32237e-05	FLQKS(1)PEQS(1)PPAR	_FLQKS(ph)PEQS(ph)PPAR_	2	822.863	839
A3KGU7	Spectrin alpha chain, brain	Spna2	1	1	S	0.000155535	WRS(1)LQQLAEER	_WRS(ph)LQQLAEER_	2	748.356	1217
Q61687	Transcriptional regulator ATRX	Atrx	1	1	S	4.81601e-38	YVES(1)DDEKPTDENVNEK	_YVES(ph)DDEKPTDENVNEK_	2	1045.93	92
B1AQX7	SRC kinase signaling inhibitor 1	Srcin1	1	1;2	S	8.86116e-39	KDS(0.97)GS(0.03)SSVFAES(1)PGGK	_KDS(ph)GSSSVFAES(ph)PGGK_	2	850.334	556
B1AQX7	SRC kinase signaling inhibitor 1	Srcin1	1	1	S	1.15341e-13	KAES(1)EELEVQKPQVK	_KAES(ph)EELEVQKPQVK_	3	607.971	1078
B1AQX7	SRC kinase signaling inhibitor 1	Srcin1	1	1	S	3.49433e-07	QVDEGMWPPPNNLLNQS(1)PK	_QVDEGMWPPPNNLLNQS(ph)PK_	2	1122.51	879
B1AQZ0	Septin-8	2015-09-08	1	1	S	7.36797e-28	AATDLERVS(1)NAEPEPR	_(ac)AATDLERVS(ph)NAEPEPR_	2	938.925	10
E9PVY8	Microtubule-actin cross-linking factor 1	Macf1	1	1	S	7.73786e-20	LLDAEDVDVPS(1)PDEK	_LLDAEDVDVPS(ph)PDEK_	2	861.38	280
H7BWZ2	Brain-specific angiogenesis inhibitor 2	Bai2	1	1	S	0.00224826	LS(1)LDEDEEPK	_LS(ph)LDEDEEPK_	2	627.76	1269
Q8VBY2	Calcium/calmodulin-dependent protein kinase kinase 1	Camkk1	1	1	S	9.46077e-05	S(1)FGNPFEPQAR	_S(ph)FGNPFEPQAR_	2	665.285	458
P0C0A3	Charged multivesicular body protein 6	Chmp6	1	1	S	1.4039e-11	MHQVMS(1)IEEVER	_MHQVMS(ph)IEEVER_	2	784.336	119
B2RRE2	Unconventional myosin-XVIIIa	Myo18a	1	1;2	S	1.12898e-57	FSHSYLS(1)DS(1)DTEAK	_FSHSYLS(ph)DS(ph)DTEAK_	2	873.818	2036
B2RRE7	OTU domain-containing protein 4	Otud4	1	2	S	4.24572e-07	LQRPKEES(1)S(1)EDENEVSNILR	_LQRPKEES(ph)S(ph)EDENEVSNILR_	3	844.705	1016
B2RRE7	OTU domain-containing protein 4	Otud4	1	2	S	4.24572e-07	LQRPKEES(1)S(1)EDENEVSNILR	_LQRPKEES(ph)S(ph)EDENEVSNILR_	3	844.705	1017
B2RUJ5	Amyloid beta A4 precursor protein-binding family A member 1	Apba1	1	1;2	S	3.68797e-08	AAEDMPEAEQDLERAPT(1)PGGGHPDS(1)PGLPAPAGQQQR	_AAEDMPEAEQDLERAPT(ph)PGGGHPDS(ph)PGLPAPAGQQQR_	4	985.177	317
B2RUJ5	Amyloid beta A4 precursor protein-binding family A member 1	Apba1	1	2;3	S	1.62331e-19	LHHYDERS(1)DGES(1)DS(1)PEKEAEFAPYPR	_LHHYDERS(ph)DGES(ph)DS(ph)PEKEAEFAPYPR_	3	1101.09	252
E9Q6E5		Srsf11	1	1	S	1.37088e-58	DYDEEEQGYDS(1)EKEKK	_DYDEEEQGYDS(ph)EKEKK_	2	1036.4	462
B8QI35	Liprin-alpha-3	Ppfia3	1	1	S	1.31084e-10	RGS(1)ALGPDEAGGELER	_RGS(ph)ALGPDEAGGELER_	3	565.256	17
B9EKI3	TATA element modulatory factor	Tmf1	1	1	S	9.76627e-07	SVSEINS(1)DDELPGK	_SVSEINS(ph)DDELPGK_	2	785.338	340
F6ZFU0	Elongation factor 1-delta	Eef1d	1	1	S	3.41553e-47	GATPAEDDEDKDIDLFGS(1)DEEEEDKEAAR	_GATPAEDDEDKDIDLFGS(ph)DEEEEDKEAAR_	4	819.836	433
Q9R1R2	Tripartite motif-containing protein 3	Trim3	1	1	S	5.94219e-13	REDS(1)PGPEVQPMDK	_REDS(ph)PGPEVQPMDK_	3	555.571	7
D3YVE8	Solute carrier family 35 member G2	Slc35g2	1	1	S	2.55599e-08	REDYQEILDS(1)PIK	_REDYQEILDS(ph)PIK_	2	843.393	409
E9PX52	Arf-GAP with SH3 domain, ANK repeat and PH domain-containing protein 2	Asap2	1	1	S	3.97289e-38	LLHEDLDES(1)DDDVDEK	_LLHEDLDES(ph)DDDVDEK_	3	656.265	701
Q7TNM2	Tripartite motif-containing protein 46	Trim46	1	1	S	1.03625e-19	LQESFQGAPDVIS(1)PR	_LQESFQGAPDVIS(ph)PR_	2	862.406	627
Q80YR5	Scaffold attachment factor B2	Safb2	1	1	S	1.07403e-41	APTAALS(1)PEPQDSKEDVK	_APTAALS(ph)PEPQDSKEDVK_	2	981.956	387
Q91YS4		Klc2	1	1	S	3.02175e-61	KLDEDAS(1)PNEEKGDVPK	_KLDEDAS(ph)PNEEKGDVPK_	2	975.938	151
F8SLQ3	PEX5-related protein	Pex5l	1	1	S	1.30278e-13	NHS(1)LEEEFER	_NHS(ph)LEEEFER_	3	457.186	250
D3YYI8	Histone deacetylase	Gm10093	1	1	S	2.29731e-07	MLPHAPGVQMQAIPEDAIPEES(1)GDEDEEDPDKR	_MLPHAPGVQMQAIPEDAIPEES(ph)GDEDEEDPDKR_	4	932.155	393
D3YYY8		Arhgef26	1	1	S	2.83124e-12	ALDIDS(1)DEEPEAK	_ALDIDS(ph)DEEPEAK_	2	756.311	390
F6ZGR6		D430041D05Rik	1	1;2	S	2.80489e-79	NVT(1)AS(1)DEEEGAGLFDSAGK	_NVT(ph)AS(ph)DEEEGAGLFDSAGK_	2	1028.89	1163
D3Z4J3	Unconventional myosin-Va	Myo5a	1	1	S	0.000449524	KIGELEVGQMENIS(1)PGQIIDEPIRPVNIPR	_KIGELEVGQMENIS(ph)PGQIIDEPIRPVNIPR_	4	856.194	1452
Q61337	Bcl2 antagonist of cell death	Bad	1	1	S	3.06647e-10	RMS(1)DEFEGSFK	_RMS(ph)DEFEGSFK_	2	706.781	155
D3YZU1	SH3 and multiple ankyrin repeat domains protein 1	Shank1	1	1	S	2.37428e-07	EQDVVPFQES(1)PK	_EQDVVPFQES(ph)PK_	2	741.829	413
D3Z0M6	Cytoplasmic dynein 1 intermediate chain 1	Dync1i1	1	1	S	3.49829e-07	ANRADS(1)EEEGAVELAA	_ANRADS(ph)EEEGAVELAA_	2	856.362	635
Q9ES28	Rho guanine nucleotide exchange factor 7	Arhgef7	1	1	S	9.82098e-08	EIKPSEKPVS(1)PK	_EIKPSEKPVS(ph)PK_	2	709.868	228
F8WHQ1	Tumor protein D52	Tpd52	1	1	S	2.52702e-09	S(1)FEEKVENLK	_S(ph)FEEKVENLK_	2	651.803	198
P54227	Stathmin	Stmn1	1	1	S	2.9131e-18	ASGQAFELILS(1)PR	_ASGQAFELILS(ph)PR_	2	734.863	25
P54227	Stathmin	Stmn1	1	1	S	1.28914e-09	KKDLS(1)LEEIQK	_KKDLS(ph)LEEIQK_	3	470.913	46
P54227	Stathmin	Stmn1	1	1	S	4.75757e-26	SKESVPDFPLS(1)PPK	_SKESVPDFPLS(ph)PPK_	2	804.389	38
P54227	Stathmin	Stmn1	1	1	S	0.0232204	RKS(1)HEAEVLK	_RKS(ph)HEAEVLK_	3	426.218	63
Q9CQF4	Uncharacterized protein C6orf203 homolog	1700021F05Rik	1	1	S	5.81298e-31	EADEEDS(1)DEETSYPER	_EADEEDS(ph)DEETSYPER_	2	990.847	106
Q8BFT9	Synaptic vesicle 2-related protein	Svop	1	1;2	S	4.40741e-32	SEDDAAS(1)GEHDIQIEGVR	_SEDDAAS(ph)GEHDIQIEGVR_	3	669.948	31
G3X9Z6	Stathmin-4	Stmn4	1	1	S	0.0099962	RRDPS(1)LEEIQK	_RRDPS(ph)LEEIQK_	2	725.856	117
D3Z4T9	Zinc finger Ran-binding domain-containing protein 2	Zranb2	1	1	S	1.28834e-33	ENVEYIEREES(1)DGEYDEFGRK	_ENVEYIEREES(ph)DGEYDEFGRK_	3	891.704	130
D3Z4T9	Zinc finger Ran-binding domain-containing protein 2	Zranb2	1	1	S	3.66156e-224	EVEDKES(1)EGEEEDEDEDLSKYK	_EVEDKES(ph)EGEEEDEDEDLSKYK_	3	904.359	163
Q9D0L7	Armadillo repeat-containing protein 10	Armc10	1	1	S	3.51605e-86	S(1)AEDLTDGSYDDILNAEQLKK	_S(ph)AEDLTDGSYDDILNAEQLKK_	2	1203.04	43
D3Z656	Synaptojanin-1	Synj1	1	1	S	1.57377e-81	TPGPPSSQGS(1)PVDTQPAAQK	_TPGPPSSQGS(ph)PVDTQPAAQK_	2	1015.47	1124
D3Z7Q5	Programmed cell death protein 5	Pdcd5	1	1	S	8.73447e-05	VMDS(1)DEDDADY	_VMDS(ph)DEDDADY_	2	677.705	198
Q3URD3	Sarcolemmal membrane-associated protein	Slmap	1	1	S	0.0078176	SDVIHAPLPS(1)PVDK	_SDVIHAPLPS(ph)PVDK_	2	777.882	148
D3Z7W0	Iron-sulfur cluster assembly enzyme ISCU, mitochondrial	Iscu	1	1;2	S	0.00828121	AAS(1)ALLLRS(1)PR	_AAS(ph)ALLLRS(ph)PR_	2	657.82	15
D3Z7W0	Iron-sulfur cluster assembly enzyme ISCU, mitochondrial	Iscu	1	2	S	0.00828121	AAS(1)ALLLRS(1)PR	_AAS(ph)ALLLRS(ph)PR_	2	657.82	21
P70452	Syntaxin-4	Stx4	1	1	S	0.00320139	QGDNIS(1)DDEDEVR	_QGDNIS(ph)DDEDEVR_	2	786.297	15
P51859	Hepatoma-derived growth factor	Hdgf	1	1	S	2.73556e-08	AGDVLEDS(1)PKRPK	_AGDVLEDS(ph)PKRPK_	3	497.912	165
P51859	Hepatoma-derived growth factor	Hdgf	1	1;2	S	2.85071e-54	GSAEGS(1)S(1)DEEGKLVIDEPAKEK	_GSAEGS(ph)S(ph)DEEGKLVIDEPAKEK_	3	812.347	132
P51859	Hepatoma-derived growth factor	Hdgf	1	2	S	2.85071e-54	GSAEGS(1)S(1)DEEGKLVIDEPAK	_GSAEGS(ph)S(ph)DEEGKLVIDEPAK_	2	1089.45	133
E0CXB9	Catenin alpha-2	Ctnna2	1	1	S	9.17401e-12	HIS(1)PVQALSEFK	_HIS(ph)PVQALSEFK_	2	718.353	952
E0CXB9	Catenin alpha-2	Ctnna2	1	1	S	9.48008e-153	TPEELEDDS(1)DFEQEDYDVR	_TPEELEDDS(ph)DFEQEDYDVR_	2	1205.96	653
G3XA20		Grip2	1	1	S	0.0022376	RQS(1)IPEEFR	_RQS(ph)IPEEFR_	2	621.287	43
F8VPX1	Ubiquitin carboxyl-terminal hydrolase	Usp7	1	1	S	1.78683e-08	AGEQQLS(1)EPEDMEMEAGDTDDPPR	_AGEQQLS(ph)EPEDMEMEAGDTDDPPR_	3	909.686	19
Q8WTY4	Anamorsin	Ciapin1	1	1	S	6.70804e-12	EALS(1)PEEVQSVQEHLGYHSDSLR	_EALS(ph)PEEVQSVQEHLGYHSDSLR_	3	897.408	136
Q62433	Protein NDRG1	Ndrg1	1	1	S	0.000919778	S(1)RELHDVDLAEVKPLVEK	_(ac)S(ph)RELHDVDLAEVKPLVEK_	3	733.707	2
E9PW07	Protein Dos	Dos	1	1	S	8.50465e-08	HAS(1)LDGASPYFK	_HAS(ph)LDGASPYFK_	2	686.8	297
E9PWN0	Phosphatidate phosphatase LPIN2	Lpin2	1	2	S	5.87549e-08	KEEQAASPVAEDVGDVGVS(1)S(1)DDEKR	_KEEQAASPVAEDVGDVGVS(ph)S(ph)DDEKR_	3	926.39	224
E9PWN0	Phosphatidate phosphatase LPIN2	Lpin2	1	1;2	S	5.87549e-08	KEEQAASPVAEDVGDVGVS(1)S(1)DDEKR	_KEEQAASPVAEDVGDVGVS(ph)S(ph)DDEKR_	3	926.39	225
E9PWP6		Rims1	1	2	S	1.5951e-18	AQTTARVS(1)PPES(1)PR	_AQTTARVS(ph)PPES(ph)PR_	2	828.861	447
E9PX68		Slc4a1ap	1	1	S	6.05143e-17	MLGEDS(1)DEEEEANTTEGK	_MLGEDS(ph)DEEEEANTTEGK_	2	1032.39	258
Q62108	Disks large homolog 4	Dlg4	1	1	S	1.04994e-07	EVTHSAAVEALKEAGS(1)IVR	_EVTHSAAVEALKEAGS(ph)IVR_	3	683.012	142
E9Q070	60S acidic ribosomal protein P0	Gm8730	1	2	S	7.99957e-26	AEAKEES(1)EES(1)DEDMGFGLFD	_AEAKEES(ph)EES(ph)DEDMGFGLFD_	3	798.946	304
E9Q070	60S acidic ribosomal protein P0	Gm8730	1	2	S	7.99957e-26	AEAKEES(1)EES(1)DEDMGFGLFD	_AEAKEES(ph)EES(ph)DEDMGFGLFD_	3	798.946	307
Q8R550	SH3 domain-containing kinase-binding protein 1	Sh3kbp1	1	1	S	1.62751e-24	ELS(1)GESDELGISQDEQLSK	_ELS(ph)GESDELGISQDEQLSK_	2	1072.47	156
Q8R550	SH3 domain-containing kinase-binding protein 1	Sh3kbp1	1	1	S	4.85237e-08	S(1)IEVENDFLPVEK	_S(ph)IEVENDFLPVEK_	2	799.871	274
E9Q1G8	Septin-7	2015-09-07	1	1	S	5.90317e-10	S(1)PLAQMEEERR	_S(ph)PLAQMEEERR_	2	713.313	334
E9Q1U6	CBP80/20-dependent translation initiation factor	Ctif	1	1	S	0.0189234	S(1)QEIEELER	_S(ph)QEIEELER_	2	606.761	18
E9Q2L2	Disks large homolog 2	Dlg2	1	1	S	0.028964	AIS(1)LEGEPR	_AIS(ph)LEGEPR_	1	1051.48	414
E9Q2L2	Disks large homolog 2	Dlg2	1	1	S	2.038e-06	GPELVHVS(1)EK	_GPELVHVS(ph)EK_	2	587.779	45
E9Q2L2	Disks large homolog 2	Dlg2	1	1	S	1.76236e-36	YQDEDGPHDHS(1)LPR	_YQDEDGPHDHS(ph)LPR_	2	873.349	28
E9Q3M9		2010300C02Rik	1	1	S	9.20939e-13	IMAPPERDMS(1)PPEGDVAPPKK	_IMAPPERDMS(ph)PPEGDVAPPKK_	3	781.369	507
E9Q3T0	60S acidic ribosomal protein P1	Gm10073	1	2	S	8.21646e-22	KEES(1)EES(1)EDDMGFGLFD	_KEES(ph)EES(ph)EDDMGFGLFD_	2	1062.36	101
E9Q3T0	60S acidic ribosomal protein P1	Gm10073	1	2	S	8.21646e-22	KEES(1)EES(1)EDDMGFGLFD	_KEES(ph)EES(ph)EDDMGFGLFD_	2	1062.36	104
P42208	Septin-2	2015-09-02	1	1	S	3.49372e-67	IYHLPDAES(1)DEDEDFKEQTR	_IYHLPDAES(ph)DEDEDFKEQTR_	2	1259.03	218
Q9QXS1	Plectin	Plec	1	1	S	0.00106049	AQLEPVAS(1)PAK	_AQLEPVAS(ph)PAK_	2	595.794	1443
E9Q5C9		Nolc1	1	1	S	6.84808e-126	AAKES(1)EEEEEEEETEEKK	_AAKES(ph)EEEEEEEETEEKK_	3	744.969	563
Q8CD76	Kinesin light chain 1	Klc1	1	1;2	S	0.000237633	S(1)RES(1)LNMDVVK	_S(ph)RES(ph)LNMDVVK_	2	719.296	521
Q8CD76	Kinesin light chain 1	Klc1	1	2	S	0.000237633	S(1)RES(1)LNMDVVK	_S(ph)RES(ph)LNMDVVK_	2	719.296	524
Q8VH51	RNA-binding protein 39	Rbm39	1	1	S	1.00517e-28	DKS(1)PVREPIDNLTPEER	_DKS(ph)PVREPIDNLTPEER_	2	1037.99	136
E9Q8P8	Protein FAM131B	Fam131b	1	2	S	1.39334e-37	DTDAYS(1)DLS(1)DGEKEAR	_DTDAYS(ph)DLS(ph)DGEKEAR_	2	966.351	142
E9Q8P8	Protein FAM131B	Fam131b	1	1;2	S	2.32415e-48	DTDAYS(1)DLS(1)DGEKEAR	_DTDAYS(ph)DLS(ph)DGEKEAR_	2	966.351	145
Q3U214	Microtubule-associated serine/threonine-protein kinase 3	Mast3	1	1	S	2.24643e-07	KQEAVQEVS(1)FDEEPGPPR	_KQEAVQEVS(ph)FDEEPGPPR_	3	707.988	1289
E9Q9J4	Inositol hexakisphosphate and diphosphoinositol-pentakisphosphate kinase 2	Ppip5k2	1	1	S	2.9385e-12	FFHHAEEEEEEEDES(1)PPER	_FFHHAEEEEEEEDES(ph)PPER_	3	817.98	38
E9QAQ5	Glycogen synthase kinase-3 beta	Gsk3b	1	1	S	1.87051e-34	IQAAAS(1)PPANATAASDTNAGDR	_IQAAAS(ph)PPANATAASDTNAGDR_	2	1075.48	402
E9QB01	Neural cell adhesion molecule 1	Ncam1	1	1;2	S	4.65515e-38	AAFS(1)KDES(1)KEPIVEVR	_AAFS(ph)KDES(ph)KEPIVEVR_	2	982.942	770
E9QB01	Neural cell adhesion molecule 1	Ncam1	1	1;2	S	3.63632e-48	DES(1)KEPIVEVR	_DES(ph)KEPIVEVR_	3	460.885	774
P97798	Neogenin	Neo1	1	1	S	4.36879e-06	LELKPIDKS(1)PDPNPVMTDTPIPR	_LELKPIDKS(ph)PDPNPVMTDTPIPR_	3	885.115	1209
O35927	Catenin delta-2	Ctnnd2	1	1	S	3.80272e-11	ALQS(1)PEHHIDPIYEDR	_ALQS(ph)PEHHIDPIYEDR_	2	1000.45	412
E9QNF7	Contactin-associated protein-like 2	Cntnap2	1	2	S	1.436e-10	GAES(1)AES(1)ADAAIMNNDPNFTETIDESKK	_GAES(ph)AES(ph)ADAAIMNNDPNFTETIDESKK_	3	1039.09	1304
E9QNF7	Contactin-associated protein-like 2	Cntnap2	1	1;2	S	1.77263e-14	GAES(1)AES(1)ADAAIMNNDPNFTETIDESKK	_GAES(ph)AES(ph)ADAAIMNNDPNFTETIDESKK_	3	1039.09	1307
E9QNZ5	Serine/threonine-protein kinase LMTK3	Lmtk3	1	1	S	0.00204277	AQRPPEGMS(1)PELPPR	_AQRPPEGMS(ph)PELPPR_	3	581.275	258
E9QP00	Transformer-2 protein homolog alpha	Tra2a	1	1;2	S	0.000507866	S(1)DVEENNFEGR	_(ac)S(ph)DVEENNFEGR_	2	709.267	2
F2Z3U3		Raph1	1	2	S	8.74764e-06	MEQLS(1)DEEIDHGAEEDS(1)DKEDQDLDK	_(ac)MEQLS(ph)DEEIDHGAEEDS(ph)DKEDQDLDK_	3	1074.73	5
F2Z3U3		Raph1	1	2	S	8.74764e-06	MEQLS(1)DEEIDHGAEEDS(1)DKEDQDLDK	_(ac)MEQLS(ph)DEEIDHGAEEDS(ph)DKEDQDLDK_	3	1074.73	17
H3BLH0	Probable global transcription activator SNF2L2	Smarca2	1	3	S	1.26432e-07	IAKEEES(1)EEES(1)NEEEEEDDEEES(0.916)ES(0.084)EAK	_IAKEEES(ph)EEES(ph)NEEEEEDDEEES(ph)ESEAK_	3	1176.4	1523
H3BLH0	Probable global transcription activator SNF2L2	Smarca2	1	3	S	1.26432e-07	IAKEEES(1)EEES(1)NEEEEEDDEEES(0.916)ES(0.084)EAK	_IAKEEES(ph)EEES(ph)NEEEEEDDEEES(ph)ESEAK_	3	1176.4	1527
F6QFD1	cAMP-specific 3',5'-cyclic phosphodiesterase 4D	Pde4d	1	1	S	2.5254e-05	SDSDYDLS(1)PK	_SDSDYDLS(ph)PK_	2	603.732	148
F6RT34		Mbp	1	1	S	1.70381e-29	FS(1)WGAEGQKPGFGYGGR	_FS(ph)WGAEGQKPGFGYGGR_	2	940.909	156
F6TYB7		Mbp	1	1	S	0.0243196	GS(1)GKVPWLK	_GS(ph)GKVPWLK_	2	526.27	92
Q8K1Z0	Ubiquinone biosynthesis protein COQ9, mitochondrial	Coq9	1	1	S	3.81998e-58	YTDQS(1)GEEEEDYESEEQLQHR	_YTDQS(ph)GEEEEDYESEEQLQHR_	3	894.343	81
Q3UM45	Protein phosphatase 1 regulatory subunit 7	Ppp1r7	1	2	S	6.24279e-18	HGGGGIVANLS(1)EQS(1)LKDGVDR	_HGGGGIVANLS(ph)EQS(ph)LKDGVDR_	2	1135	45
Q3UM45	Protein phosphatase 1 regulatory subunit 7	Ppp1r7	1	1;2	S	6.24279e-18	HGGGGIVANLS(1)EQS(1)LKDGVDR	_HGGGGIVANLS(ph)EQS(ph)LKDGVDR_	2	1135	48
P70704	Probable phospholipid-transporting ATPase IA	Atp8a1	1	2;3	S	3.17125e-62	TDDVS(1)EKT(0.186)S(0.814)LADQEEVR	_TDDVS(ph)EKTS(ph)LADQEEVR_	2	1041.42	25
P70704	Probable phospholipid-transporting ATPase IA	Atp8a1	1	1;2;3	S	3.17125e-62	TDDVS(1)EKT(1)S(1)LADQEEVR	_TDDVS(ph)EKT(ph)S(ph)LADQEEVR_	2	1081.4	29
F8WHT3	Protein PRRC2B	Prrc2b	1	1	S	1.99168e-21	LKFS(1)DDEDEEDVVKDGR	_LKFS(ph)DDEDEEDVVKDGR_	2	1038.44	387
F7BJK1		Pcdh1	1	2	S	1.23972e-21	GGQEPAGAGS(1)PS(1)PPEDR	_GGQEPAGAGS(ph)PS(ph)PPEDR_	2	884.832	1010
F7BJK1		Pcdh1	1	1;2	S	1.23972e-21	GGQEPAGAGS(1)PS(1)PPEDR	_GGQEPAGAGS(ph)PS(ph)PPEDR_	2	884.832	1012
F8WGX5	DmX-like protein 1	Dmxl1	1	1	S	5.83252e-11	WDS(1)DNDEENEDPPISMK	_WDS(ph)DNDEENEDPPISMK_	2	1050.89	1965
G3UWV4		Brsk2	1	1	S	2.04007e-67	S(1)LDIAEAHPQFSKEDR	_S(ph)LDIAEAHPQFSKEDR_	3	641.626	417
Q9Z1S3	RAS guanyl-releasing protein 1	Rasgrp1	1	1	S	8.45032e-27	SNHVLAQMDHGDS(1)A	_SNHVLAQMDHGDS(ph)A_	2	781.309	794
G3X932	Rho GTPase-activating protein 39	Arhgap39	1	1	S	1.11364e-66	AFS(1)EDEALAQQDSK	_AFS(ph)EDEALAQQDSK_	2	809.835	599
Q8VEK3	Heterogeneous nuclear ribonucleoprotein U	Hnrnpu	1	1	S	2.19522e-11	LQAALDNEAGGRPAMEPGNGS(1)LDLGGDAAGR	_LQAALDNEAGGRPAMEPGNGS(ph)LDLGGDAAGR_	3	1020.8	58
G3XA19		Ephx3	1	3	S	0.013318	KDMPEFVVT(1)ALLAPS(1)RLS(1)LK	_KDMPEFVVT(ph)ALLAPS(ph)RLS(ph)LK_	3	819.055	70
G3XA19		Ephx3	1	3	S	0.013318	KDMPEFVVT(1)ALLAPS(1)RLS(1)LK	_KDMPEFVVT(ph)ALLAPS(ph)RLS(ph)LK_	3	819.055	73
G5E829		Atp2b1	1	1	S	2.43838e-12	AQDGAAMEMQPLKS(1)EEGGDGDEKDK	_AQDGAAMEMQPLKS(ph)EEGGDGDEKDK_	3	906.042	338
G5E8R4	Serine/threonine-protein phosphatase 6 regulatory subunit 3	Ppp6r3	1	1	S	2.28557e-07	IQQFDDGGS(1)DEEDIWEEK	_IQQFDDGGS(ph)DEEDIWEEK_	2	1110.44	617
H3BJD6		Ppp1r9a	1	1;2	S	1.41627e-07	GSSDSLDS(1)LS(1)PR	_GSSDSLDS(ph)LS(ph)PR_	2	690.758	192
Q5SWP3	NAC-alpha domain-containing protein 1	Nacad	1	1	S	0.0234413	EFPALEQKDEDS(1)LEEDAQR	_EFPALEQKDEDS(ph)LEEDAQR_	3	777	1268
H7BWY8		Tsr2	1	1	S	1.27781e-32	ETDVAEDDVDS(1)VEEMEVK	_ETDVAEDDVDS(ph)VEEMEVK_	2	1059.92	143
H7BX08	Calmodulin-regulated spectrin-associated protein 2	Camsap2	1	1	S	1.39149e-57	LDGES(1)DKEQFDDDQK	_LDGES(ph)DKEQFDDDQK_	2	924.862	1137
H7BX95	Serine/arginine-rich splicing factor 1	Srsf1	1	1;2	S	4.01739e-08	VKVDGPRS(1)PS(1)YGR	_VKVDGPRS(ph)PS(ph)YGR_	2	789.347	199
J3QJW3	Calcium-dependent secretion activator 1	Cadps	1	1	S	0.00157921	VRS(1)LPEIDGLSK	_VRS(ph)LPEIDGLSK_	2	697.358	219
K4DI58	Cell adhesion molecule 3	Cadm3	1	1	S	9.29774e-19	GSDDAPDADTAIINAEGGQS(1)GGDDKK	_GSDDAPDADTAIINAEGGQS(ph)GGDDKK_	3	862.028	420
O08539	Myc box-dependent-interacting protein 1	Bin1	1	2;3	S	4.92122e-54	GNKS(1)PS(1)PPPDGS(1)PAATPEIR	_GNKS(ph)PS(ph)PPPDGS(ph)PAATPEIR_	2	1107.95	296
O08539	Myc box-dependent-interacting protein 1	Bin1	1	1;2;3	S	4.92122e-54	GNKS(1)PS(1)PPPDGS(1)PAATPEIR	_GNKS(ph)PS(ph)PPPDGS(ph)PAATPEIR_	2	1107.95	298
O08852	Polycystin-1	Pkd1	1	2	S	0.0171643	VLLEALY(1)FS(1)LVAK	_VLLEALY(ph)FS(ph)LVAK_	2	813.403	3606
O35136	Neural cell adhesion molecule 2	Ncam2	1	1	S	9.55611e-07	DGS(1)KEPIVEMR	_DGS(ph)KEPIVEMR_	2	670.799	765
O35295	Transcriptional activator protein Pur-beta	Purb	1	2	S	0.000284422	ADGDS(1)GS(1)ERGGGGGGGGGPGGFQPAPR	_(ac)ADGDS(ph)GS(ph)ERGGGGGGGGGPGGFQPAPR_	3	839.326	6
O35295	Transcriptional activator protein Pur-beta	Purb	1	2	S	0.000284422	ADGDS(1)GS(1)ERGGGGGGGGGPGGFQPAPR	_(ac)ADGDS(ph)GS(ph)ERGGGGGGGGGPGGFQPAPR_	3	839.326	8
O35526	Syntaxin-1A	Stx1a	1	1	S	3.45678e-25	HSAILAS(1)PNPDEK	_HSAILAS(ph)PNPDEK_	2	729.835	64
O35526	Syntaxin-1A	Stx1a	1	1	S	5.63086e-108	TAKDS(1)DDDDDVTVTVDRDR	_TAKDS(ph)DDDDDVTVTVDRDR_	3	739.976	14
Q3TUQ5	Pinin	Pnn	1	1	S	4.82794e-05	QES(1)DPEDDDVKKPALQSSVVATSK	_QES(ph)DPEDDDVKKPALQSSVVATSK_	3	885.08	100
O54774	AP-3 complex subunit delta-1	Ap3d1	1	1;2;3	S	1.27468e-91	HS(0.007)S(0.993)LPT(1)ES(1)DEDIAPAQR	_HSS(ph)LPT(ph)ES(ph)DEDIAPAQR_	2	1046.89	760
O54774	AP-3 complex subunit delta-1	Ap3d1	1	1	S	1.6891e-64	NAEAVKS(1)PEKEGVLGVEK	_NAEAVKS(ph)PEKEGVLGVEK_	2	982.49	825
O54774	AP-3 complex subunit delta-1	Ap3d1	1	1	S	2.649e-20	VDIITEEMPENALPS(1)DEDDKDPNDPYR	_VDIITEEMPENALPS(ph)DEDDKDPNDPYR_	3	1066.45	784
O55091	Protein IMPACT	Impact	1	1	S	1.39622e-34	TEEVEVES(1)EEDPILEHPPENPVK	_TEEVEVES(ph)EEDPILEHPPENPVK_	3	909.076	137
O70166	Stathmin-3	Stmn3	1	1	S	0.000179205	RKDAS(1)LEELQK	_RKDAS(ph)LEELQK_	3	466.233	81
O88532	Zinc finger RNA-binding protein	Zfr	1	1	S	1.44787e-18	RRDS(1)DGVDGFEAEGK	_RRDS(ph)DGVDGFEAEGK_	2	859.362	1054
O88703	Potassium/sodium hyperpolarization-activated cyclic nucleotide-gated channel 2	Hcn2	1	1	S	3.01313e-125	GAASGPSAAEEAGS(1)EEAGPAGEPR	_GAASGPSAAEEAGS(ph)EEAGPAGEPR_	3	745.645	119
O88737	Protein bassoon	Bsn	1	1	S	2.45687e-25	GEEES(1)EEDSYDPR	_GEEES(ph)EEDSYDPR_	2	811.281	3301
O88737	Protein bassoon	Bsn	1	1	S	3.60914e-10	ISKFS(1)PIEEAK	_ISKFS(ph)PIEEAK_	2	664.829	3382
O88737	Protein bassoon	Bsn	1	2;4	S	1.25926e-70	TPPSNLS(1)PIEDAS(0.996)PT(0.004)EELR	_TPPSNLS(ph)PIEDAS(ph)PTEELR_	2	1106.97	1108
O88737	Protein bassoon	Bsn	1	1;2;3	S	2.52511e-38	SQASEEES(1)PVS(1)PLGRPR	_SQASEEES(ph)PVS(ph)PLGRPR_	2	993.422	3516
O88737	Protein bassoon	Bsn	1	1;2;3	S	8.33234e-48	S(0.001)QAS(0.999)EEES(1)PVS(1)PLGRPR	_SQAS(ph)EEES(ph)PVS(ph)PLGRPR_	2	1033.41	3519
O88935	Synapsin-1	Syn1	1	1;2	S	1.80428e-07	PVAGGPGAPPAARPPAS(1)PS(1)PQR	_PVAGGPGAPPAARPPAS(ph)PS(ph)PQR_	3	732.343	551
O88935	Synapsin-1	Syn1	1	2	S	1.80428e-07	PVAGGPGAPPAARPPAS(1)PS(1)PQR	_PVAGGPGAPPAARPPAS(ph)PS(ph)PQR_	3	732.343	553
P00375	Dihydrofolate reductase	Dhfr	1	1	S	0.00783053	LIEQPELAS(1)K	_LIEQPELAS(ph)K_	2	604.302	108
A6ZI44	Fructose-bisphosphate aldolase	Aldoa	1	1	S	7.76893e-14	LQS(1)IGTENTEENR	_LQS(ph)IGTENTEENR_	2	785.841	100
P05132	cAMP-dependent protein kinase catalytic subunit alpha	Prkaca	1	1	S	2.30179e-18	FKGPGDTSNFDDYEEEEIRVS(1)INEK	_FKGPGDTSNFDDYEEEEIRVS(ph)INEK_	3	1000.1	339
P07901	Heat shock protein HSP 90-alpha	Hsp90aa1	1	1	S	1.52296e-175	ESDDKPEIEDVGS(1)DEEEEEKK	_ESDDKPEIEDVGS(ph)DEEEEEKK_	3	839.341	263
P08551	Neurofilament light polypeptide	Nefl	1	1	S	1.96735e-05	AEEAKDEPPS(1)EGEAEEEEK	_AEEAKDEPPS(ph)EGEAEEEEK_	3	728.29	473
P08551	Neurofilament light polypeptide	Nefl	1	1	S	5.04123e-53	ESEEEEKKEES(1)AGEEQVAK	_ESEEEEKKEES(ph)AGEEQVAK_	2	1122.97	532
P08553	Neurofilament medium polypeptide	Nefm	1	2	S	7.54676e-47	EEEEEGEKEEEEEGQEEEEEEDEGVKS(1)DQAEEGGS(1)EK	_EEEEEGEKEEEEEGQEEEEEEDEGVKS(ph)DQAEEGGS(ph)EK_	3	1463.53	537
P08553	Neurofilament medium polypeptide	Nefm	1	2	S	7.54676e-47	EEEEEGEKEEEEEGQEEEEEEDEGVKS(1)DQAEEGGS(1)EK	_EEEEEGEKEEEEEGQEEEEEEDEGVKS(ph)DQAEEGGS(ph)EK_	3	1463.53	545
P08553	Neurofilament medium polypeptide	Nefm	1	1	S	5.78344e-10	GVVTNGLDVS(1)PAEEK	_GVVTNGLDVS(ph)PAEEK_	2	797.872	769
P09405	Nucleolin	Ncl	1	1	S	3.08996e-17	NLS(1)FNITEDELK	_NLS(ph)FNITEDELK_	2	751.842	403
P11499	Heat shock protein HSP 90-beta	Hsp90ab1	1	1	S	5.76645e-21	EREKEIS(1)DDEAEEEK	_EREKEIS(ph)DDEAEEEK_	2	958.394	226
P14873	Microtubule-associated protein 1B	Map1b	1	1	S	3.56375e-154	GEAEQS(1)EEEGEEEDKAEDAR	_GEAEQS(ph)EEEGEEEDKAEDAR_	2	1158.93	1013
P14873	Microtubule-associated protein 1B	Map1b	1	1	S	2.83073e-113	EVSSKEEQS(1)PVKAEVAEK	_EVSSKEEQS(ph)PVKAEVAEK_	2	1027.49	614
P14873	Microtubule-associated protein 1B	Map1b	1	1	S	1.22584e-63	TPGDFNYAYQKPENAAGS(1)PDEEDYDYESQEK	_TPGDFNYAYQKPENAAGS(ph)PDEEDYDYESQEK_	3	1213.15	1877
P14873	Microtubule-associated protein 1B	Map1b	1	1	S	1.27849e-11	VQSLEGEKLS(1)PK	_VQSLEGEKLS(ph)PK_	2	697.85	1775
P16014	Secretogranin-1	Chgb	1	1	S	6.51872e-17	SSYEGHPLS(1)EER	_SSYEGHPLS(ph)EER_	2	735.798	308
P16014	Secretogranin-1	Chgb	1	1	S	5.70802e-12	WWQQEEQLGPEES(1)REEVRFPDR	_WWQQEEQLGPEES(ph)REEVRFPDR_	3	970.766	493
P16054	Protein kinase C epsilon type	Prkce	1	1	S	2.36816e-51	ASSATDGQLAS(1)PGENGEVRPGQAK	_ASSATDGQLAS(ph)PGENGEVRPGQAK_	3	803.034	388
P16054	Protein kinase C epsilon type	Prkce	1	1	S	0.0017913	GFS(1)YFGEDLMP	_GFS(ph)YFGEDLMP_	2	671.757	729
P16054	Protein kinase C epsilon type	Prkce	1	1	S	5.45897e-25	LAAGAES(1)PQPASGNSPSEDDR	_LAAGAES(ph)PQPASGNSPSEDDR_	2	1068.45	329
P16125	L-lactate dehydrogenase B chain	Ldhb	1	1	S	3.39397e-05	LIAS(1)VADDEAAVPNNK	_LIAS(ph)VADDEAAVPNNK_	2	853.903	11
P16330	2',3'-cyclic-nucleotide 3'-phosphodiesterase	Cnp	1	1	S	1.04087e-11	NQWQLS(1)ADDLKK	_NQWQLS(ph)ADDLKK_	2	763.356	169
P16330	2',3'-cyclic-nucleotide 3'-phosphodiesterase	Cnp	1	1	S	0.0260078	GGS(1)QGEAVGELPR	_GGS(ph)QGEAVGELPR_	2	668.798	358
P17095	High mobility group protein HMG-I/HMG-Y	Hmga1	1	2	S	3.99341e-53	KLEKEEEEGISQES(1)S(1)EEEQ	_KLEKEEEEGISQES(ph)S(ph)EEEQ_	2	1198.97	102
P17095	High mobility group protein HMG-I/HMG-Y	Hmga1	1	2	S	3.99341e-53	KLEKEEEEGISQES(1)S(1)EEEQ	_KLEKEEEEGISQES(ph)S(ph)EEEQ_	2	1198.97	103
P17182	Alpha-enolase	Eno1	1	1	S	1.02996e-61	SGKYDLDFKS(1)PDDPSR	_SGKYDLDFKS(ph)PDDPSR_	2	953.915	263
P17183	Gamma-enolase	Eno2	1	1	S	4.74948e-29	DGKYDLDFKS(1)PADPSR	_DGKYDLDFKS(ph)PADPSR_	2	945.917	263
P19246	Neurofilament heavy polypeptide	Nefh	1	1	S	8.70234e-97	AKPLDVKS(1)PEAQTPVQEEAK	_AKPLDVKS(ph)PEAQTPVQEEAK_	2	1123.06	834
P19246	Neurofilament heavy polypeptide	Nefh	1	2	S	1.62322e-52	SPAAVKS(1)PAEAKS(1)PAAVK	_SPAAVKS(ph)PAEAKS(ph)PAAVK_	2	934.95	727
P19246	Neurofilament heavy polypeptide	Nefh	1	2	S	1.62322e-52	SPAAVKS(1)PAEAKS(1)PAAVK	_SPAAVKS(ph)PAEAKS(ph)PAAVK_	2	934.95	733
P19246	Neurofilament heavy polypeptide	Nefh	1	2	S	5.3207e-17	SPAEAKS(1)PAEAKS(1)PAEVK	_SPAEAKS(ph)PAEAKS(ph)PAEVK_	3	652.962	667
P19246	Neurofilament heavy polypeptide	Nefh	1	2	S	5.3207e-17	SPAEAKS(1)PAEAKS(1)PAEVK	_SPAEAKS(ph)PAEAKS(ph)PAEVK_	3	652.962	673
P19246	Neurofilament heavy polypeptide	Nefh	1	2	S	5.954e-79	SPAEAKS(1)PAEAKS(1)PIEVK	_SPAEAKS(ph)PAEAKS(ph)PIEVK_	2	999.963	757
P19246	Neurofilament heavy polypeptide	Nefh	1	2	S	5.954e-79	SPAEAKS(1)PAEAKS(1)PIEVK	_SPAEAKS(ph)PAEAKS(ph)PIEVK_	2	999.963	763
P19246	Neurofilament heavy polypeptide	Nefh	1	2;3	S	3.62485e-42	SPAEPKS(1)PAEPKS(1)PAEAK	_SPAEPKS(ph)PAEPKS(ph)PAEAK_	2	990.939	571
P19246	Neurofilament heavy polypeptide	Nefh	1	2;3	S	1.70071e-32	S(1)PAEAKS(1)PAEPKS(1)PATVK	_S(ph)PAEAKS(ph)PAEPKS(ph)PATVK_	2	1017.93	577
P19246	Neurofilament heavy polypeptide	Nefh	1	2	S	2.08599e-41	SPAEPKS(1)PAEAKS(1)PAEVK	_SPAEPKS(ph)PAEAKS(ph)PAEVK_	2	991.947	691
P19246	Neurofilament heavy polypeptide	Nefh	1	2;3	S	2.08599e-41	S(1)PAEVKS(1)PAEAKS(1)PAEVK	_S(ph)PAEVKS(ph)PAEAKS(ph)PAEVK_	2	1032.94	697
P19246	Neurofilament heavy polypeptide	Nefh	1	2;3	S	4.26269e-32	S(1)PAEVKS(1)PAEAKS(1)PAEVK	_S(ph)PAEVKS(ph)PAEAKS(ph)PAEVK_	2	1032.94	703
P19246	Neurofilament heavy polypeptide	Nefh	1	2	S	6.02312e-32	SPAEAKS(1)PIEVKS(1)PEK	_SPAEAKS(ph)PIEVKS(ph)PEK_	2	928.926	769
P19246	Neurofilament heavy polypeptide	Nefh	1	3	S	4.9983e-32	S(1)PGEAKS(1)PAEPKS(1)PAEPK	_S(ph)PGEAKS(ph)PAEPKS(ph)PAEPK_	2	1023.91	559
P19246	Neurofilament heavy polypeptide	Nefh	1	2;3	S	3.62485e-42	S(1)PGEAKS(1)PAEPKS(1)PAEPK	_S(ph)PGEAKS(ph)PAEPKS(ph)PAEPK_	2	1023.91	565
P19246	Neurofilament heavy polypeptide	Nefh	1	2;3	S	1.98649e-17	S(1)PAEVKS(1)PAEAKS(1)PAEVK	_S(ph)PAEVKS(ph)PAEAKS(ph)PAEVK_	2	1032.94	709
P19246	Neurofilament heavy polypeptide	Nefh	1	3	S	4.9983e-32	S(1)PGEAKS(1)PAEPKS(1)PAEPK	_S(ph)PGEAKS(ph)PAEPKS(ph)PAEPK_	2	1023.91	553
P20357	Microtubule-associated protein 2	Map2	1	1	S	1.84268e-35	APHWTSASLTEAAAHPHS(1)PEMK	_APHWTSASLTEAAAHPHS(ph)PEMK_	3	812.698	28
P20357	Microtubule-associated protein 2	Map2	1	1;2	S	2.53141e-70	DGS(1)PDAPAT(1)PEKEEVAFSEYK	_DGS(ph)PDAPAT(ph)PEKEEVAFSEYK_	2	1213.99	1352
P26231	Catenin alpha-1	Ctnna1	1	1	S	3.4595e-95	TPEELDDS(1)DFETEDFDVR	_TPEELDDS(ph)DFETEDFDVR_	2	1119.93	641
P26369	Splicing factor U2AF 65 kDa subunit	U2af2	1	1	S	2.10717e-14	GAKEEHGGLIRS(1)PR	_GAKEEHGGLIRS(ph)PR_	2	793.894	79
P26369	Splicing factor U2AF 65 kDa subunit	U2af2	1	1	S	0.0140006	S(1)DFDEFER	_(ac)S(ph)DFDEFER_	2	583.706	2
P35564	Calnexin	Canx	1	1	S	1.5875e-31	AEEDEILNRS(1)PR	_AEEDEILNRS(ph)PR_	3	503.563	582
P35802	Neuronal membrane glycoprotein M6-a	Gpm6a	1	1	S	4.46116e-17	YEDIKS(1)KEEQELHDIHSTR	_YEDIKS(ph)KEEQELHDIHSTR_	3	813.039	256
P38647	Stress-70 protein, mitochondrial	Hspa9	1	2	S	0.0227526	S(1)DIGEVILVGGMT(1)R	_S(ph)DIGEVILVGGMT(ph)R_	2	803.851	378
P43276	Histone H1.5	Hist1h1b	1	1	S	2.18023e-42	SETAPAETAAPAPVEKS(1)PAK	_(ac)SETAPAETAAPAPVEKS(ph)PAK_	2	1037.49	18
P46460	Vesicle-fusing ATPase	Nsf	1	1	S	0.00154947	EEGAS(1)PLDFD	_EEGAS(ph)PLDFD_	2	580.213	739
P48722	Heat shock 70 kDa protein 4L	Hspa4l	1	1	S	3.11101e-10	S(1)FDDPIVQTER	_S(ph)FDDPIVQTER_	2	693.8	74
Q3U3J1	2-oxoisovalerate dehydrogenase subunit alpha, mitochondrial	Bckdha	1	1	S	2.83509e-08	S(1)VDEVNYWDKQDHPISR	_S(ph)VDEVNYWDKQDHPISR_	3	723.32	348
P53986	Monocarboxylate transporter 1	Slc16a1	1	1;2	S	1.6943e-66	AAQSPQQHSSGDPTEEES(1)PV	_AAQSPQQHSSGDPTEEES(ph)PV_	2	1080.94	491
P53986	Monocarboxylate transporter 1	Slc16a1	1	1	S	6.83814e-33	SDANTDLIGGS(1)PK	_SDANTDLIGGS(ph)PK_	2	677.798	230
P56399	Ubiquitin carboxyl-terminal hydrolase 5	Usp5	1	1;2	S	6.52671e-10	SAAES(1)IS(0.999)ES(0.001)VPVGPK	_SAAES(ph)IS(ph)ESVPVGPK_	2	809.344	783
P56564	Excitatory amino acid transporter 1	Slc1a3	1	1	S	1.10901e-19	DVEMGNS(1)VIEENEMK	_DVEMGNS(ph)VIEENEMK_	2	902.362	512
P58404	Striatin-4	Strn4	1	1	S	4.334e-05	AS(1)PGPGGLSGGESLLVK	_AS(ph)PGPGGLSGGESLLVK_	2	803.398	223
P58871	182 kDa tankyrase-1-binding protein	Tnks1bp1	1	2	S	0.000289359	VPS(1)S(1)DEEVVEEPQSR	_VPS(ph)S(ph)DEEVVEEPQSR_	2	923.861	1611
P58871	182 kDa tankyrase-1-binding protein	Tnks1bp1	1	2	S	0.000289359	VPS(1)S(1)DEEVVEEPQSR	_VPS(ph)S(ph)DEEVVEEPQSR_	2	923.861	1612
P61264	Syntaxin-1B	Stx1b	1	1	S	2.52799e-127	SAKDS(1)DDEEEVVHVDR	_SAKDS(ph)DDEEEVVHVDR_	2	955.394	14
P61264	Syntaxin-1B	Stx1b	1	1	S	0.0174352	KQHS(1)AILAAPNPDEK	_KQHS(ph)AILAAPNPDEK_	3	566.945	58
P61329	Fibroblast growth factor 12	Fgf12	1	1	S	5.85622e-05	EPS(1)LHEIGEK	_EPS(ph)LHEIGEK_	2	609.774	212
P61967	AP-1 complex subunit sigma-1A	Ap1s1	1	1	S	2.81124e-61	AIEQADLLQEEDES(1)PR	_AIEQADLLQEEDES(ph)PR_	3	641.617	147
P63141	Potassium voltage-gated channel subfamily A member 2	Kcna2	1	2	S	0.00130312	IPS(1)S(1)PDLK	_IPS(ph)S(ph)PDLK_	2	508.709	440
P63141	Potassium voltage-gated channel subfamily A member 2	Kcna2	1	2	S	0.00130312	IPS(1)S(1)PDLK	_IPS(ph)S(ph)PDLK_	2	508.709	441
P63141	Potassium voltage-gated channel subfamily A member 2	Kcna2	1	1	S	4.00535e-12	SDYMEIQEGVNNS(1)NEDFREENLK	_SDYMEIQEGVNNS(ph)NEDFREENLK_	3	947.395	468
P70288	Histone deacetylase 2	Hdac2	1	1	S	1.79295e-17	MLPHAPGVQMQAIPEDAVHEDS(1)GDEDGEDPDKR	_MLPHAPGVQMQAIPEDAVHEDS(ph)GDEDGEDPDKR_	3	1222.52	394
P70408	Cadherin-10	Cdh10	1	1	S	1.02269e-05	LAEMYGGGES(1)DKDA	_LAEMYGGGES(ph)DKDA_	2	761.792	784
P70441	Na(+)/H(+) exchange regulatory cofactor NHE-RF1	Slc9a3r1	1	1	S	0.00194324	S(1)ADAAAGEPLPR	_(ac)S(ph)ADAAAGEPLPR_	2	638.782	2
P70663	SPARC-like protein 1	Sparcl1	1	1	S	2.51731e-24	AAGS(1)KEHIPHTEQQDQEGK	_AAGS(ph)KEHIPHTEQQDQEGK_	3	723.99	283
P97868	E3 ubiquitin-protein ligase RBBP6	Rbbp6	1	1	S	1.01424e-09	WDKDDFES(1)EEEDVK	_WDKDDFES(ph)EEEDVK_	2	925.854	1329
P99027	60S acidic ribosomal protein P2	Rplp2	1	2	S	3.44002e-38	KEES(1)EES(1)DDDMGFGLFD	_KEES(ph)EES(ph)DDDMGFGLFD_	2	1055.35	102
P99027	60S acidic ribosomal protein P2	Rplp2	1	2	S	3.44002e-38	KEES(1)EES(1)DDDMGFGLFD	_KEES(ph)EES(ph)DDDMGFGLFD_	2	1055.35	105
Q04690	Neurofibromin	Nf1	1	1	S	1.559e-09	S(1)FDHLISDTK	_S(ph)FDHLISDTK_	2	621.774	2545
Q0PHV7	Dapper homolog 3	Dact3	1	1	S	1.8631e-10	S(1)LGDASPSAPESVGAR	_S(ph)LGDASPSAPESVGAR_	2	790.851	165
Q0VF59	Disks large-associated protein 2	Dlgap2	1	1	S	0.00624027	EKS(1)LDLPDR	_EKS(ph)LDLPDR_	3	384.848	1013
Q2TBE6	Phosphatidylinositol 4-kinase type 2-alpha	Pi4k2a	1	1;2	S	1.37985e-07	MDET(0.001)S(0.999)PLVS(1)PER	_(ac)MDETS(ph)PLVS(ph)PER_	2	781.796	9
Q8R0A7	Uncharacterized protein KIAA0513	Kiaa0513	1	1	S	8.19337e-47	TVTMIS(1)PEDEQKGEK	_TVTMIS(ph)PEDEQKGEK_	2	886.395	275
Q3TDQ1	Dolichyl-diphosphooligosaccharide--protein glycosyltransferase subunit STT3B	Stt3b	1	1;2	S	4.09416e-12	ENPPVEDS(1)S(1)DEDDKRNPGNLYDK	_ENPPVEDS(ph)S(ph)DEDDKRNPGNLYDK_	3	931.702	495
Q3TDQ1	Dolichyl-diphosphooligosaccharide--protein glycosyltransferase subunit STT3B	Stt3b	1	1;2	S	4.09416e-12	ENPPVEDS(1)S(1)DEDDKRNPGNLYDK	_ENPPVEDS(ph)S(ph)DEDDKRNPGNLYDK_	3	931.702	496
Q3TES0	IQ motif and SEC7 domain-containing protein 3	Iqsec3	1	1	S	2.61322e-05	AQAPELQQEEERPGAVGS(1)PR	_AQAPELQQEEERPGAVGS(ph)PR_	3	743.681	256
Q9R0U0	Serine/arginine-rich splicing factor 10	Srsf10	1	2	S	0.000961008	S(1)RS(1)FDYNYR	_S(ph)RS(ph)FDYNYR_	2	684.245	131
Q3TQI7	Uncharacterized protein C9orf78 homolog		1	1	S	2.11227e-10	VGDTEKPEPERS(1)PPNR	_VGDTEKPEPERS(ph)PPNR_	3	629.958	261
Q9CQY2	RNMT-activating mini protein	Fam103a1	1	1	S	0.000930744	RPPES(1)PPIVEEWNSR	_RPPES(ph)PPIVEEWNSR_	3	624.96	36
Q3TRR0	Microtubule-associated protein 9	Map9	1	1	S	0.0456762	KQS(1)LEPDKADHIR	_KQS(ph)LEPDKADHIR_	4	404.95	414
Q3TXS7	26S proteasome non-ATPase regulatory subunit 1	Psmd1	1	2	S	5.67478e-49	TASAVAGKT(1)PDAS(1)PEPK	_TASAVAGKT(ph)PDAS(ph)PEPK_	2	893.887	315
Q3U0V1	Far upstream element-binding protein 2	Khsrp	1	1	S	4.06589e-18	VQIS(1)PDSGGLPER	_VQIS(ph)PDSGGLPER_	2	717.835	182
Q9Z1R2	Large proline-rich protein BAG6	Bag6	1	1	S	8.62633e-11	ENAS(1)PAPGTTAEEAMSR	_ENAS(ph)PAPGTTAEEAMSR_	2	899.869	995
Q3UHE1	Membrane-associated phosphatidylinositol transfer protein 3	Pitpnm3	1	1;2	S	1.35767e-07	GS(1)PPLLDAPAS(1)PPQAPR	_GS(ph)PPLLDAPAS(ph)PPQAPR_	2	915.913	495
Q3UHE1	Membrane-associated phosphatidylinositol transfer protein 3	Pitpnm3	1	2	S	1.35767e-07	GS(1)PPLLDAPAS(1)PPQAPR	_GS(ph)PPLLDAPAS(ph)PPQAPR_	2	915.913	504
Q3UHX2	28 kDa heat- and acid-stable phosphoprotein	Pdap1	1	1;2	S	3.84912e-132	SLDS(1)DES(1)EDEDDDYQQK	_SLDS(ph)DES(ph)EDEDDDYQQK_	2	1089.35	60
Q3UHX2	28 kDa heat- and acid-stable phosphoprotein	Pdap1	1	1;2	S	1.47072e-79	SLDS(1)DES(1)EDEDDDYQQKR	_SLDS(ph)DES(ph)EDEDDDYQQKR_	2	1167.4	63
Q6PDG5	SWI/SNF complex subunit SMARCC2	Smarcc2	1	1	S	0.000114569	DMDEPS(1)PVPNVEEVTLPK	_DMDEPS(ph)PVPNVEEVTLPK_	2	1038.47	347
Q3UMU9	Hepatoma-derived growth factor-related protein 2	Hdgfrp2	1	2	S	6.82108e-25	GGS(1)S(1)GEELEDEEPVK	_GGS(ph)S(ph)GEELEDEEPVK_	2	861.313	366
Q3UMU9	Hepatoma-derived growth factor-related protein 2	Hdgfrp2	1	2	S	6.82108e-25	GGS(1)S(1)GEELEDEEPVK	_GGS(ph)S(ph)GEELEDEEPVK_	2	861.313	367
Q3UNH4	G protein-regulated inducer of neurite outgrowth 1	Gprin1	1	1	S	1.30572e-07	APS(1)WDAGAPPPR	_APS(ph)WDAGAPPPR_	2	651.287	714
Q3UNH4	G protein-regulated inducer of neurite outgrowth 1	Gprin1	1	1	S	1.7345e-35	NSELVS(1)PVKPER	_NSELVS(ph)PVKPER_	2	717.853	369
Q4FK66	Pre-mRNA-splicing factor 38A	Prpf38a	1	2	S	2.18238e-19	VSALEEDMDDVES(1)S(1)EEEEEEDEKLER	_VSALEEDMDDVES(ph)S(ph)EEEEEEDEKLER_	3	1077.41	193
Q4FK66	Pre-mRNA-splicing factor 38A	Prpf38a	1	2	S	2.18238e-19	VSALEEDMDDVES(1)S(1)EEEEEEDEKLER	_VSALEEDMDDVES(ph)S(ph)EEEEEEDEKLER_	3	1077.41	194
Q569Z6	Thyroid hormone receptor-associated protein 3	Thrap3	1	2	S	1.85673e-06	ERS(1)PALKS(1)PLQSVVVR	_ERS(ph)PALKS(ph)PLQSVVVR_	3	642.659	248
Q569Z6	Thyroid hormone receptor-associated protein 3	Thrap3	1	1	S	0.00104798	HGLTHEELKS(1)PR	_HGLTHEELKS(ph)PR_	3	495.24	695
Q569Z6	Thyroid hormone receptor-associated protein 3	Thrap3	1	1	S	3.92699e-07	MDS(1)FDEDLAR	_MDS(ph)FDEDLAR_	2	639.739	572
Q569Z6	Thyroid hormone receptor-associated protein 3	Thrap3	1	1	S	2.42923e-08	S(1)REEEWDPEYTPK	_S(ph)REEEWDPEYTPK_	2	873.356	860
Q569Z6	Thyroid hormone receptor-associated protein 3	Thrap3	1	1;2	S	7.0454e-35	WAHDKFS(1)GEEGEIEDDES(0.427)GT(0.573)ENREEK	_WAHDKFS(ph)GEEGEIEDDESGT(ph)ENREEK_	3	1061.74	924
Q60829	Protein phosphatase 1 regulatory subunit 1B	Ppp1r1b	1	1	S	3.11796e-15	ATLSEPGEEPQHPS(1)PP	_ATLSEPGEEPQHPS(ph)PP_	2	876.877	192
Q61136	Serine/threonine-protein kinase PRP4 homolog	Prpf4b	1	2	S	2.73137e-10	EVIEAS(1)DKEGLS(1)PAKR	_EVIEAS(ph)DKEGLS(ph)PAKR_	3	630.287	88
Q61136	Serine/threonine-protein kinase PRP4 homolog	Prpf4b	1	2	S	2.73137e-10	EVIEAS(1)DKEGLS(1)PAKR	_EVIEAS(ph)DKEGLS(ph)PAKR_	3	630.287	94
Q61423	Potassium voltage-gated channel subfamily A member 4	Kcna4	1	1	S	5.74174e-81	ELS(1)EEEEDEEEEEEEEEEGR	_ELS(ph)EEEEDEEEEEEEEEEGR_	2	1281.95	122
Q61771	Kinesin-like protein KIF3B	Kif3b	1	1	S	0.000176345	DYEGPAIS(1)PK	_DYEGPAIS(ph)PK_	2	578.75	681
Q62048	Astrocytic phosphoprotein PEA-15	Pea15	1	1	S	1.67244e-19	YKDIIRQPS(1)EEEIIK	_YKDIIRQPS(ph)EEEIIK_	2	970.99	116
Q62093	Serine/arginine-rich splicing factor 2	Srsf2	1	2;3	S	1.28202e-06	S(1)KS(1)PPKS(1)PEEEGAVSS	_S(ph)KS(ph)PPKS(ph)PEEEGAVSS_	2	928.344	206
Q62093	Serine/arginine-rich splicing factor 2	Srsf2	1	2;3	S	1.28202e-06	S(1)KS(1)PPKS(1)PEEEGAVSS	_S(ph)KS(ph)PPKS(ph)PEEEGAVSS_	2	928.344	208
Q62093	Serine/arginine-rich splicing factor 2	Srsf2	1	3	S	1.28202e-06	S(1)KS(1)PPKS(1)PEEEGAVSS	_S(ph)KS(ph)PPKS(ph)PEEEGAVSS_	2	928.344	212
Q62261	Spectrin beta chain, brain 1	Sptbn1	1	1	S	5.9122e-63	VSEEAESQQWDTSKGDQVSQNGLPAEQGS(1)PR	_VSEEAESQQWDTSKGDQVSQNGLPAEQGS(ph)PR_	3	1142.17	2137
Q62318	Transcription intermediary factor 1-beta	Trim28	1	1	S	8.13339e-52	S(1)GEGEVSGLLR	_S(ph)GEGEVSGLLR_	2	592.271	473
Q640R3	Hepatocyte cell adhesion molecule	Hepacam	1	1	S	5.04568e-47	QNS(1)LEYMDQNDDRLK	_QNS(ph)LEYMDQNDDRLK_	2	974.909	280
Q64727	Vinculin	Vcl	1	1	S	2.37221e-11	GWLRDPNAS(1)PGDAGEQAIR	_GWLRDPNAS(ph)PGDAGEQAIR_	3	697.32	290
Q80ZF8	Brain-specific angiogenesis inhibitor 3	Bai3	1	1	S	0.00343994	IS(1)LNDDEEEK	_IS(ph)LNDDEEEK_	2	636.256	1220
Q6P4T2		Snrnp200	1	1	S	1.15269e-10	EEAS(1)DDDMEGDEAVVR	_EEAS(ph)DDDMEGDEAVVR_	2	923.838	225
Q6P9K8	Caskin-1	Caskin1	1	1	S	5.02167e-06	VPLPGPGS(1)PEVK	_VPLPGPGS(ph)PEVK_	2	628.818	1259
Q6PE13	Proline-rich transmembrane protein 3	Prrt3	1	1	S	1.55552e-24	RGS(1)QPDAELDGAGTSLLR	_RGS(ph)QPDAELDGAGTSLLR_	2	961.952	845
Q6ZPF3	T-lymphoma invasion and metastasis-inducing protein 2	Tiam2	1	1	S	4.77657e-62	ESDILS(1)DEDEDFHHPLK	_ESDILS(ph)DEDEDFHHPLK_	2	1053.44	1590
Q6ZQ58	La-related protein 1	Larp1	1	1	S	9.93184e-18	ESPRPPAAAEAPAGS(1)DGEDGGRR	_ESPRPPAAAEAPAGS(ph)DGEDGGRR_	3	777.343	81
Q6ZWU9	40S ribosomal protein S27	Rps27	1	1	S	9.63398e-05	DLLHPS(1)PEEEK	_DLLHPS(ph)PEEEK_	2	687.303	11
Q7TQ95	Protein lunapark	Lnp	1	1	S	0.000177823	ADS(1)VPNLEPSEESLVTK	_ADS(ph)VPNLEPSEESLVTK_	2	947.938	411
Q7TSJ2	Microtubule-associated protein 6	Map6	1	1	S	3.93742e-06	AQS(1)PLLPEPLK	_AQS(ph)PLLPEPLK_	2	636.834	687
Q80T41	Gamma-aminobutyric acid type B receptor subunit 2	Gabbr2	1	1	S	1.06404e-12	DPIEDINS(1)PEHIQR	_DPIEDINS(ph)PEHIQR_	2	871.891	883
Q80WJ7	Protein LYRIC	Mtdh	1	1	S	1.14185e-24	SQEPISNDQKVS(1)DDDKEK	_SQEPISNDQKVS(ph)DDDKEK_	3	714.646	423
Q80X80	C2 domain-containing protein 2-like	C2cd2l	1	1	S	2.71829e-07	SLSPAATVTAELHYEQGS(1)PR	_SLSPAATVTAELHYEQGS(ph)PR_	3	732.011	411
Q80YA9	Connector enhancer of kinase suppressor of ras 2	Cnksr2	1	1;2	S	1.40361e-34	IKQEQDYWS(1)ES(1)DKEEADTPSTPK	_IKQEQDYWS(ph)ES(ph)DKEEADTPSTPK_	3	957.726	685
Q80YA9	Connector enhancer of kinase suppressor of ras 2	Cnksr2	1	2	S	1.40361e-34	IKQEQDYWS(1)ES(1)DKEEADTPSTPK	_IKQEQDYWS(ph)ES(ph)DKEEADTPSTPK_	3	957.726	687
Q80YA9	Connector enhancer of kinase suppressor of ras 2	Cnksr2	1	1	S	5.48718e-08	LGDS(1)LQDLYR	_LGDS(ph)LQDLYR_	2	630.287	906
Q8BG39	Synaptic vesicle glycoprotein 2B	Sv2b	1	1;2	S	3.29544e-35	SNEQNQEEDAQS(1)DVT(1)EGHDEEDEIYEGEYQGIPHPDDVK	_SNEQNQEEDAQS(ph)DVT(ph)EGHDEEDEIYEGEYQGIPHPDDVK_	3	1545.6	33
Q8BGC0	HIV Tat-specific factor 1 homolog	Htatsf1	1	1	S	0.000151053	EFEEDS(1)DEKEEEGDDDEEEVVYER	_EFEEDS(ph)DEKEEEGDDDEEEVVYER_	3	1010.71	621
Q8BGE6	Cysteine protease ATG4B	Atg4b	1	1	S	1.57938e-26	FFDS(1)EDEDFEILSL	_FFDS(ph)EDEDFEILSL_	2	893.361	383
Q8BH66	Atlastin-1	Atl1	1	1;2	S	1.06619e-18	SSDWS(1)S(1)EEEEPVRK	_SSDWS(ph)S(ph)EEEEPVRK_	2	912.84	22
Q8BH66	Atlastin-1	Atl1	1	1;2	S	1.06619e-18	SSDWS(1)S(1)EEEEPVRK	_SSDWS(ph)S(ph)EEEEPVRK_	2	912.84	23
Q8BJI1	Sodium-dependent neutral amino acid transporter SLC6A17	Slc6a17	1	1	S	1.55704e-08	DIS(1)NLEENDETR	_DIS(ph)NLEENDETR_	2	757.804	665
Q8BPN8	DmX-like protein 2	Dmxl2	1	1	S	1.14486e-158	FGNVDADS(1)PVEETIQDHSALK	_FGNVDADS(ph)PVEETIQDHSALK_	2	1176.52	1288
Q8BPN8	DmX-like protein 2	Dmxl2	1	1	S	1.02481e-09	KQS(1)EVEADLGYPGGK	_KQS(ph)EVEADLGYPGGK_	2	829.377	2636
Q8BPN8	DmX-like protein 2	Dmxl2	1	2	S	9.28916e-25	QLDHES(1)DDADREDEERS(1)QDER	_QLDHES(ph)DDADREDEERS(ph)QDER_	3	912.001	423
Q8BPN8	DmX-like protein 2	Dmxl2	1	1;2	S	9.28916e-25	QLDHES(1)DDADREDEERS(1)QDER	_QLDHES(ph)DDADREDEERS(ph)QDER_	3	912.001	434
Q8BR92	Paralemmin-2	Palm2	1	1	S	1.20552e-37	AELVLIDEDDEKS(1)LR	_AELVLIDEDDEKS(ph)LR_	2	912.935	315
Q8BRV5	Uncharacterized protein KIAA1671	Kiaa1671	1	1	S	3.88488e-05	RDES(1)DEEPPRVER	_RDES(ph)DEEPPRVER_	3	565.244	205
Q8BTI8	Serine/arginine repetitive matrix protein 2	Srrm2	1	3	S	0.00184216	S(1)LT(1)RS(1)PPAIR	_S(ph)LT(ph)RS(ph)PPAIR_	2	669.274	2019
Q8BTI8	Serine/arginine repetitive matrix protein 2	Srrm2	1	3	S	0.00184216	S(1)LT(1)RS(1)PPAIR	_S(ph)LT(ph)RS(ph)PPAIR_	2	669.274	2023
Q8BTI8	Serine/arginine repetitive matrix protein 2	Srrm2	1	2;3	S	0.0298481	S(1)RS(1)RS(1)PLAIR	_S(ph)RS(ph)RS(ph)PLAIR_	2	691.791	1996
Q8BTI8	Serine/arginine repetitive matrix protein 2	Srrm2	1	2;3	S	0.0298481	S(1)RS(1)RS(1)PLAIR	_S(ph)RS(ph)RS(ph)PLAIR_	2	691.791	1998
Q8BTI8	Serine/arginine repetitive matrix protein 2	Srrm2	1	3	S	0.0409675	S(1)RS(1)RS(1)PLAIR	_S(ph)RS(ph)RS(ph)PLAIR_	2	691.791	1994
Q8BTI8	Serine/arginine repetitive matrix protein 2	Srrm2	1	1;2	S	0.04085	S(1)RT(1)PLLPR	_S(ph)RT(ph)PLLPR_	2	550.257	1984
Q8BUK6	Protein Hook homolog 3	Hook3	1	1	S	6.93983e-21	LNQSDSIEDPNS(1)PAGR	_LNQSDSIEDPNS(ph)PAGR_	2	890.381	238
Q8BX70	Vacuolar protein sorting-associated protein 13C	Vps13c	1	1	S	6.83969e-08	TANAS(1)LEEIIDK	_TANAS(ph)LEEIIDK_	2	692.324	736
Q8C031	Leucine-rich repeat-containing protein 4C	Lrrc4c	1	1	S	0.00130049	MNS(1)KDNVQETQI	_MNS(ph)KDNVQETQI_	2	743.816	631
Q8C078	Calcium/calmodulin-dependent protein kinase kinase 2	Camkk2	1	1	S	0.00163041	S(1)FGNPFEGSR	_S(ph)FGNPFEGSR_	2	589.237	495
Q8C4Y1		Max	1	1	S	2.81838e-10	S(1)DNDDIEVESDADKR	_(ac)S(ph)DNDDIEVESDADKR_	2	915.357	2
S4R291	Ankyrin-2	Ank2	1	1	S	7.39263e-42	ARS(1)YIETETESR	_ARS(ph)YIETETESR_	2	761.333	3357
S4R291	Ankyrin-2	Ank2	1	1	S	8.52545e-10	GS(1)PIVQEPEEASEPK	_GS(ph)PIVQEPEEASEPK_	2	838.874	3759
S4R291	Ankyrin-2	Ank2	1	1	S	5.19719e-93	IVDEQGDMDFQIS(1)PDRK	_IVDEQGDMDFQIS(ph)PDRK_	2	1036.95	2085
S4R291	Ankyrin-2	Ank2	1	3	S	4.57194e-05	KGS(1)S(1)EES(1)VDEDRGLVPEPLPTAK	_KGS(ph)S(ph)EES(ph)VDEDRGLVPEPLPTAK_	3	894.045	1699
S4R291	Ankyrin-2	Ank2	1	3	S	4.57194e-05	KGS(1)S(1)EES(1)VDEDRGLVPEPLPTAK	_KGS(ph)S(ph)EES(ph)VDEDRGLVPEPLPTAK_	3	894.045	1700
S4R291	Ankyrin-2	Ank2	1	3	S	4.57194e-05	KGS(1)S(1)EES(1)VDEDRGLVPEPLPTAK	_KGS(ph)S(ph)EES(ph)VDEDRGLVPEPLPTAK_	3	894.045	1703
S4R291	Ankyrin-2	Ank2	1	1	S	1.75605e-26	LLRDPDGS(1)AEDDSLEQTSLMESSGK	_LLRDPDGS(ph)AEDDSLEQTSLMESSGK_	3	920.735	2470
S4R291	Ankyrin-2	Ank2	1	1	S	4.13744e-58	SHLAEDSQTHSADAADGS(1)DGDLNR	_SHLAEDSQTHSADAADGS(ph)DGDLNR_	3	850.344	2713
S4R291	Ankyrin-2	Ank2	1	1	S	1.63581e-17	S(1)PQGLELPLPNR	_S(ph)PQGLELPLPNR_	2	700.85	2359
Q8C996	Transmembrane protein 163	Tmem163	1	1	S	6.61635e-07	ISESGQFS(1)DGLEDR	_ISESGQFS(ph)DGLEDR_	2	810.333	60
Q8C996	Transmembrane protein 163	Tmem163	1	1	S	0.000117237	S(1)PPGPGVPRPPPR	_S(ph)PPGPGVPRPPPR_	2	695.853	11
Q8CH25	SAFB-like transcription modulator	Sltm	1	1	S	8.05819e-47	DVQDAIAQS(1)PEKEAK	_DVQDAIAQS(ph)PEKEAK_	2	854.893	289
Q8CHW4	Translation initiation factor eIF-2B subunit epsilon	Eif2b5	1	1	S	0.00264379	AGS(1)PQLDDIR	_AGS(ph)PQLDDIR_	2	576.258	540
Q8CI71	Coiled-coil domain-containing protein 132	Ccdc132	1	1;2	S	2.81972e-52	SAYQDYDS(1)DS(1)DVPEELKR	_SAYQDYDS(ph)DS(ph)DVPEELKR_	2	1138.94	559
Q8CI71	Coiled-coil domain-containing protein 132	Ccdc132	1	2	S	2.10598e-24	SAYQDYDS(1)DS(1)DVPEELKR	_SAYQDYDS(ph)DS(ph)DVPEELKR_	2	1138.94	561
Q8CI75	DIS3-like exonuclease 2	Dis3l2	1	1	S	1.50636e-12	RPGLEKAS(1)DEEPED	_RPGLEKAS(ph)DEEPED_	2	826.346	864
Q8JZQ9	Eukaryotic translation initiation factor 3 subunit B	Eif3b	1	1;2	S	2.66361e-86	GHPSAGAEEEGGS(1)DGS(1)AAEAEPR	_GHPSAGAEEEGGS(ph)DGS(ph)AAEAEPR_	2	1164.43	120
Q8JZQ9	Eukaryotic translation initiation factor 3 subunit B	Eif3b	1	2	S	2.66361e-86	GHPSAGAEEEGGS(1)DGS(1)AAEAEPR	_GHPSAGAEEEGGS(ph)DGS(ph)AAEAEPR_	2	1164.43	123
Q8JZW4	Copine-5	Cpne5	1	3;4	S	4.961e-07	PRPPPAAPAQS(1)PPQS(1)PAHS(1)PPGS(0.999)PVHT(0.002)HI	_PRPPPAAPAQS(ph)PPQS(ph)PAHS(ph)PPGS(ph)PVHTHI_	3	1078.12	575
Q8JZX4	Splicing factor 45	Rbm17	1	1	S	7.76125e-15	RPDPDS(1)DEDEDYERER	_RPDPDS(ph)DEDEDYERER_	3	701.603	155
Q8K039	Uncharacterized protein KIAA1143 homolog		1	1	S	0.00362288	KIQPQLPDEDGNHS(1)DKEDEQPQVVVLK	_KIQPQLPDEDGNHS(ph)DKEDEQPQVVVLK_	4	792.133	50
Q8K070	Sterile alpha motif domain-containing protein 14	Samd14	1	1	S	6.26604e-11	DAS(1)PPEPASPTIGLDKK	_DAS(ph)PPEPASPTIGLDKK_	2	901.932	173
Q8K0T0	Reticulon-1	Rtn1	1	1	S	6.80843e-21	REQDS(1)PPMKPGALDAIR	_REQDS(ph)PPMKPGALDAIR_	3	654.315	487
Q8K1J5	UPF0667 protein C1orf55 homolog		1	1	S	5.84167e-26	EDGIDAVEVAADRPGS(1)PR	_EDGIDAVEVAADRPGS(ph)PR_	2	967.436	269
Q8K1M6	Dynamin-1-like protein	Dnm1l	1	1	S	0.000185424	SKPIPIMPAS(1)PQK	_SKPIPIMPAS(ph)PQK_	2	737.38	622
Q8K2C9	3-hydroxyacyl-CoA dehydratase 3	ptplad1	1	1	S	1.53393e-11	WLDES(1)DAEMELR	_WLDES(ph)DAEMELR_	2	787.316	114
Q8K3X4	Interferon regulatory factor 2-binding protein-like	Irf2bpl	1	1	S	3.76413e-14	KAS(1)PEPPDSAESALK	_KAS(ph)PEPPDSAESALK_	2	803.872	526
Q8R1Q8	Cytoplasmic dynein 1 light intermediate chain 1	Dync1li1	1	1	S	3.0373e-32	DFQEYVEPGEDFPAS(1)PQRR	_DFQEYVEPGEDFPAS(ph)PQRR_	2	1174.01	207
Q8R4E6	Purine-rich element-binding protein gamma	Purg	1	2;3	S	3.87371e-26	HS(0.001)APS(0.999)PPVS(1)VGS(1)EEHPHSVLK	_HSAPS(ph)PPVS(ph)VGS(ph)EEHPHSVLK_	3	806.669	163
Q8VBT0	Thioredoxin-related transmembrane protein 1	Tmx1	1	1	S	1.28986e-84	KVEEEQEADEEDVS(1)EEEAEDREGASK	_KVEEEQEADEEDVS(ph)EEEAEDREGASK_	3	1016.08	245
Q8VD37	SH3-containing GRB2-like protein 3-interacting protein 1	Sgip1	1	1	S	0.0012425	HVPS(1)PLNLEEVQKK	_HVPS(ph)PLNLEEVQKK_	3	566.626	371
Q8VD37	SH3-containing GRB2-like protein 3-interacting protein 1	Sgip1	1	2;3	S	3.28112e-17	WVHFS(1)DAS(1)PEHVT(1)PELTPR	_WVHFS(ph)DAS(ph)PEHVT(ph)PELTPR_	3	815.662	316
Q8VD37	SH3-containing GRB2-like protein 3-interacting protein 1	Sgip1	1	1;2;3	S	1.72588e-32	WVHFS(1)DAS(1)PEHVT(1)PELTPR	_WVHFS(ph)DAS(ph)PEHVT(ph)PELTPR_	3	815.662	319
Q8VDN2	Sodium/potassium-transporting ATPase subunit alpha-1	Atp1a1	1	1	S	1.66128e-19	S(1)PDFTNENPLETR	_S(ph)PDFTNENPLETR_	2	800.338	228
Q8VDZ4	Palmitoyltransferase ZDHHC5	Zdhhc5	1	1	S	4.6545e-07	GDS(1)LKEPTSIADSSR	_GDS(ph)LKEPTSIADSSR_	2	821.87	380
Q8VE52	Opioid growth factor receptor-like protein 1	Ogfrl1	1	1	S	3.63043e-07	AS(1)PVPEDHAEAAGAEQGGESTEGNAKPK	_AS(ph)PVPEDHAEAAGAEQGGESTEGNAKPK_	3	938.745	65
Q8VED9	Galectin-related protein A	Lgalsla	1	2	S	1.36214e-05	LDDGHLNNS(1)LGS(1)PVQADVYFPR	_LDDGHLNNS(ph)LGS(ph)PVQADVYFPR_	3	858.707	22
Q8VED9	Galectin-related protein A	Lgalsla	1	1;2	S	5.84359e-18	LDDGHLNNS(1)LGS(1)PVQADVYFPR	_LDDGHLNNS(ph)LGS(ph)PVQADVYFPR_	3	858.707	25
Q91XF0	Pyridoxine-5'-phosphate oxidase	Pnpo	1	1	S	9.5251e-59	GLATGDS(1)PLGPMTHHGEEDWVYER	_GLATGDS(ph)PLGPMTHHGEEDWVYER_	3	912.058	241
Q91XV3	Brain acid soluble protein 1	Basp1	1	2;3	S	1.18997e-36	KAEGAGT(0.012)EEEGT(0.988)PKES(1)EPQAAADATEVK	_KAEGAGTEEEGT(ph)PKES(ph)EPQAAADATEVK_	3	997.423	40
Q91XV3	Brain acid soluble protein 1	Basp1	1	1	S	2.03312e-27	EEAPKAEPEKS(1)EGAAEEQPEPAPAPEQEAAAPGPAAGGEAPK	_EEAPKAEPEKS(ph)EGAAEEQPEPAPAPEQEAAAPGPAAGGEAPK_	3	1400.64	92
Q91XV3	Brain acid soluble protein 1	Basp1	1	2	S	5.16716e-58	AGEAS(1)AES(0.964)T(0.036)GAADGAAPEEGEAK	_AGEAS(ph)AES(ph)TGAADGAAPEEGEAK_	2	1118.42	128
Q9Z2F7	BCL2/adenovirus E1B 19 kDa protein-interacting protein 3-like	Bnip3l	1	3	S	3.56527e-06	DHS(1)S(1)QS(1)EEEVVEGEKEVEALKK	_DHS(ph)S(ph)QS(ph)EEEVVEGEKEVEALKK_	3	909.368	116
Q9Z2F7	BCL2/adenovirus E1B 19 kDa protein-interacting protein 3-like	Bnip3l	1	3	S	3.56527e-06	DHS(1)S(1)QS(1)EEEVVEGEKEVEALKK	_DHS(ph)S(ph)QS(ph)EEEVVEGEKEVEALKK_	3	909.368	117
Q9Z2F7	BCL2/adenovirus E1B 19 kDa protein-interacting protein 3-like	Bnip3l	1	3	S	3.56527e-06	DHS(1)S(1)QS(1)EEEVVEGEKEVEALKK	_DHS(ph)S(ph)QS(ph)EEEVVEGEKEVEALKK_	3	909.368	119
Q99J36	THUMP domain-containing protein 1	Thumpd1	1	2	S	6.44308e-26	FIDKDQQPS(1)GS(1)EGEDDDAEAALKK	_FIDKDQQPS(ph)GS(ph)EGEDDDAEAALKK_	4	689.036	86
Q99J36	THUMP domain-containing protein 1	Thumpd1	1	2	S	6.44308e-26	FIDKDQQPS(1)GS(1)EGEDDDAEAALKK	_FIDKDQQPS(ph)GS(ph)EGEDDDAEAALKK_	4	689.036	88
Q99L45	Eukaryotic translation initiation factor 2 subunit 2	Eif2s2	1	1	S	0.000754471	S(1)GDEMIFDPTMSK	_(ac)S(ph)GDEMIFDPTMSK_	2	790.306	2
Q99LI7	Cleavage stimulation factor subunit 3	Cstf3	1	1	S	5.31216e-12	RPNEDS(1)DEDEEKGAVVPPVHDIYR	_RPNEDS(ph)DEDEEKGAVVPPVHDIYR_	3	949.426	691
Q99NE5	Regulating synaptic membrane exocytosis protein 1	Rims1	1	1	S	0.00291479	S(1)LDEIHPTR	_S(ph)LDEIHPTR_	2	574.261	812
Q99P72	Reticulon-4	Rtn4	1	1	S	4.92454e-34	VVKEDGVMS(1)PEK	_VVKEDGVMS(ph)PEK_	3	466.551	344
Q99PT1	Rho GDP-dissociation inhibitor 1	Arhgdia	1	1	S	1.7313e-07	S(1)IQEIQELDKDDESLR	_S(ph)IQEIQELDKDDESLR_	2	999.457	34
Q9CPQ3	Mitochondrial import receptor subunit TOM22 homolog	Tomm22	1	1	S	3.4316e-12	AAAVAAAGAGEPLS(1)PEELLPK	_(ac)AAAVAAAGAGEPLS(ph)PEELLPK_	3	695.349	15
Q9CW46	Ribonucleoprotein PTB-binding 1	Raver1	1	1	S	1.88515e-46	AADVSVTHRPPLS(1)PEAEAEAETPETVDR	_(ac)AADVSVTHRPPLS(ph)PEAEAEAETPETVDR_	3	1032.81	14
Q9CZ44	NSFL1 cofactor p47	Nsfl1c	1	1	S	0.00807746	RHS(1)GQDVHVVLK	_RHS(ph)GQDVHVVLK_	3	485.58	176
Q9CZH7	Matrix-remodeling-associated protein 7	Mxra7	1	1	S	9.41139e-22	VAEPEES(1)EAEEPAAEGR	_VAEPEES(ph)EAEEPAAEGR_	2	940.383	79
Q9CZW5	Mitochondrial import receptor subunit TOM70	Tomm70a	1	1	S	2.55411e-106	AS(1)PALGSGHHDGSGDSLEMSSLDR	_AS(ph)PALGSGHHDGSGDSLEMSSLDR_	3	821.68	94
Q9D0V7	Receptor-binding cancer antigen expressed on SiSo cells	Ebag9	1	1	S	5.82478e-18	KLS(1)GDQITLPTTVDYSSVPK	_KLS(ph)GDQITLPTTVDYSSVPK_	2	1115.06	36
Q9D1E6	Tubulin-folding cofactor B	Tbcb	1	1	S	0.00124167	YEIS(1)PEAYER	_YEIS(ph)PEAYER_	2	668.776	110
Q9D6W8	Uncharacterized protein C17orf59 homolog		1	1	S	8.88198e-12	RGS(1)PGGVEMNVELPQQEGDDDDDEDEEAAAGR	_RGS(ph)PGGVEMNVELPQQEGDDDDDEDEEAAAGR_	3	1156.47	130
Q9DBC7	cAMP-dependent protein kinase type I-alpha regulatory subunit	Prkar1a	1	1;2	S	6.09061e-17	EDEIS(1)PPPPNPVVK	_EDEIS(ph)PPPPNPVVK_	2	799.379	83
Q9DBR0	A-kinase anchor protein 8	Akap8	1	2	S	4.83261e-12	ADS(1)DGDLS(1)ENDDGAGDLR	_ADS(ph)DGDLS(ph)ENDDGAGDLR_	2	991.338	320
Q9DBR0	A-kinase anchor protein 8	Akap8	1	2	S	4.83261e-12	ADS(1)DGDLS(1)ENDDGAGDLR	_ADS(ph)DGDLS(ph)ENDDGAGDLR_	2	991.338	325
Q9DBR1	5'-3' exoribonuclease 2	Xrn2	1	2	S	3.41304e-75	KAEDS(1)DS(1)EPEPEDNVR	_KAEDS(ph)DS(ph)EPEPEDNVR_	2	988.862	499
Q9DBR1	5'-3' exoribonuclease 2	Xrn2	1	2	S	3.41304e-75	KAEDS(1)DS(1)EPEPEDNVR	_KAEDS(ph)DS(ph)EPEPEDNVR_	2	988.862	501
Q9DBR7	Protein phosphatase 1 regulatory subunit 12A	Ppp1r12a	1	1	S	0.00216563	RIS(1)EMEEELK	_RIS(ph)EMEEELK_	2	672.299	994
Q9DCB4	cAMP-regulated phosphoprotein 21	Arpp21	1	1	S	4.46595e-57	SES(1)LDEEEKLELQR	_SES(ph)LDEEEKLELQR_	2	892.901	32
Q9DCL8	Protein phosphatase inhibitor 2	Ppp1r2	1	1;2;3	S	3.24484e-65	EQES(1)S(1)GEEDNDLSPEER	_EQES(ph)S(ph)GEEDNDLSPEER_	2	1055.36	122
Q9DCL8	Protein phosphatase inhibitor 2	Ppp1r2	1	1;2;3	S	7.35006e-33	EQES(1)S(1)GEEDNDLSPEER	_EQES(ph)S(ph)GEEDNDLSPEER_	2	1055.36	123
Q9DCL8	Protein phosphatase inhibitor 2	Ppp1r2	1	3	S	3.38095e-08	T(0.005)REQES(0.998)S(0.998)GEEDNDLS(1)PEER	_TREQES(ph)S(ph)GEEDNDLS(ph)PEER_	3	816.282	131
Q9EPN1	Neurobeachin	Nbea	1	1	S	8.29446e-65	TPLENVPGNLS(1)PIKDPDR	_TPLENVPGNLS(ph)PIKDPDR_	2	1021.5	1519
Q9EQC8		Prcc	1	1;2	S	3.14136e-17	IAAPELQKGDS(1)DS(1)EEDEPAKK	_IAAPELQKGDS(ph)DS(ph)EEDEPAKK_	3	806.343	157
Q9EQC8		Prcc	1	2	S	0.024733	IAAPELQKGDS(1)DS(1)EEDEPAKK	_IAAPELQKGDS(ph)DS(ph)EEDEPAKK_	3	806.343	159
Q9ERA6	Tuftelin-interacting protein 11	Tfip11	1	2	S	9.78923e-09	GAAEEADS(1)EDS(1)DAEEKPVKQEDFPK	_GAAEEADS(ph)EDS(ph)DAEEKPVKQEDFPK_	3	961.049	96
Q9ERA6	Tuftelin-interacting protein 11	Tfip11	1	2	S	9.78923e-09	GAAEEADS(1)EDS(1)DAEEKPVKQEDFPK	_GAAEEADS(ph)EDS(ph)DAEEKPVKQEDFPK_	3	961.049	99
Q9ET77	Junctophilin-3	Jph3	1	1	S	3.85002e-05	EFS(1)PSFQHR	_EFS(ph)PSFQHR_	2	607.753	420
Q9JIS5	Synaptic vesicle glycoprotein 2A	Sv2a	1	2;3	S	1.00458e-67	GEGAQDEEEGGAS(1)S(1)DAT(1)EGHDEDDEIYEGEYQGIPR	_GEGAQDEEEGGAS(ph)S(ph)DAT(ph)EGHDEDDEIYEGEYQGIPR_	3	1361.15	80
Q9JIS5	Synaptic vesicle glycoprotein 2A	Sv2a	1	2;3	S	1.00458e-67	GEGAQDEEEGGAS(1)S(1)DAT(1)EGHDEDDEIYEGEYQGIPR	_GEGAQDEEEGGAS(ph)S(ph)DAT(ph)EGHDEDDEIYEGEYQGIPR_	3	1361.15	81
Q9JKF6	Poliovirus receptor-related protein 1	Pvrl1	1	1	S	2.58851e-12	AGIPQHHPPMAQNLQYPDDS(1)DDEKK	_AGIPQHHPPMAQNLQYPDDS(ph)DDEKK_	3	971.095	421
Q9JKK1	Syntaxin-6	Stx6	1	1	S	0.0129064	S(1)MEDPFFVVK	_(ac)S(ph)MEDPFFVVK_	2	660.783	2
Q9JLM8	Serine/threonine-protein kinase DCLK1	Dclk1	1	1	S	4.73539e-11	REES(1)EEGFQIPATITER	_REES(ph)EEGFQIPATITER_	2	1036.47	392
Q9JME5	AP-3 complex subunit beta-2	Ap3b2	1	1	S	4.77913e-89	AFYGS(1)EEDEAKGPGSEEAATAALPAR	_AFYGS(ph)EEDEAKGPGSEEAATAALPAR_	2	1352.59	272
Q9QYB8	Beta-adducin	Add2	1	1;4	S	2.17859e-57	LEQEQEGEKDIATEKPGS(1)PVK	_LEQEQEGEKDIATEKPGS(ph)PVK_	3	798.048	594
Q9QYX7	Protein piccolo	Pclo	1	1	S	2.10017e-11	ENPELVDDLS(1)PR	_ENPELVDDLS(ph)PR_	2	732.324	1439
Q9QYX7	Protein piccolo	Pclo	1	2;3	S	4.86648e-53	TPPSNLS(1)PIEDAS(0.996)PT(0.004)EELR	_TPPSNLS(ph)PIEDAS(ph)PTEELR_	2	1106.97	1766
Q9QYX7	Protein piccolo	Pclo	1	1;2	S	1.49669e-32	RHS(1)WHDEDDETFDESPELK	_RHS(ph)WHDEDDETFDESPELK_	3	817.996	1563
Q9QYX7	Protein piccolo	Pclo	1	1;2	S	2.92364e-52	HSWHDEDDETFDES(1)PELK	_HSWHDEDDETFDES(ph)PELK_	2	1148.44	1575
Q9R078	5'-AMP-activated protein kinase subunit beta-1	Prkab1	1	1	S	5.52082e-05	S(1)QNNFVAILDLPEGEHQYK	_S(ph)QNNFVAILDLPEGEHQYK_	3	761.354	108
Q9R0Q7	Prostaglandin E synthase 3	Ptges3	1	1	S	9.82667e-59	DWEDDS(1)DEDMSNFDR	_DWEDDS(ph)DEDMSNFDR_	2	978.317	113
Q9R1Q8	Transgelin-3	Tagln3	1	1	S	0.00759309	GFS(1)EEQLR	_GFS(ph)EEQLR_	2	523.221	163
Q9WV69	Dematin	Epb49	1	1	S	7.11708e-153	KGAEEEEEEEDDDS(1)EEEIK	_KGAEEEEEEEDDDS(ph)EEEIK_	3	773.623	226
Q9WV92	Band 4.1-like protein 3	Epb41l3	1	1	S	7.9392e-61	S(1)LDGASVSENHEIYMK	_S(ph)LDGASVSENHEIYMK_	2	930.398	451
Q9WVF8	Tumor suppressor candidate 2	Tusc2	1	1	S	6.73142e-18	RGS(1)MFYDEDGDLAHEFYEETIVTK	_RGS(ph)MFYDEDGDLAHEFYEETIVTK_	3	978.084	50
Q9Z0H8	CAP-Gly domain-containing linker protein 2	Clip2	1	1	S	0.000494807	VLLLEANRHS(1)PGPER	_VLLLEANRHS(ph)PGPER_	3	589.968	924
Q9Z0V2	Potassium voltage-gated channel subfamily D member 2	Kcnd2	1	1	S	1.64397e-07	GS(1)VQELSTIQIR	_GS(ph)VQELSTIQIR_	2	705.853	552
Q9Z1T1	AP-3 complex subunit beta-1	Ap3b1	1	1	S	2.91106e-26	NFYES(1)EEEEEEKEK	_NFYES(ph)EEEEEEKEK_	2	949.864	276
Q9Z1W9	STE20/SPS1-related proline-alanine-rich protein kinase	Stk39	1	1	S	2.94147e-45	TEDGDWEWS(1)DDEMDEKSEEGK	_TEDGDWEWS(ph)DDEMDEKSEEGK_	2	1298.96	397
Q9Z1Z0	General vesicular transport factor p115	Uso1	1	1	S	8.55045e-25	LKDLGHPVEEEDES(1)GDQEDDDDEIDDGDKDQDI	_LKDLGHPVEEEDES(ph)GDQEDDDDEIDDGDKDQDI_	4	953.126	940
Q9Z204	Heterogeneous nuclear ribonucleoproteins C1/C2	Hnrnpc	1	1	S	3.17213e-31	MESEAGADDS(1)AEEGDLLDDDDNEDRGDDQLELK	_M(ox)ESEAGADDS(ph)AEEGDLLDDDDNEDRGDDQLELK_	3	1236.48	268
Q9Z2H5	Band 4.1-like protein 1	Epb41l1	1	1	S	1.23159e-112	GPSSQEDESGGLEDS(1)PDR	_GPSSQEDESGGLEDS(ph)PDR_	2	971.371	677
Q9Z2H5	Band 4.1-like protein 1	Epb41l1	1	1	S	0.00218394	LVS(1)PEPPPK	_LVS(ph)PEPPPK_	2	522.262	378
Q9Z2H5	Band 4.1-like protein 1	Epb41l1	1	1	S	1.46665e-35	PASVSENHDAGPEGDKREDDAES(1)GGR	_PASVSENHDAGPEGDKREDDAES(ph)GGR_	3	921.381	461
Z4YJR7	Sorbin and SH3 domain-containing protein 2	Sorbs2	1	1	S	6.03992e-05	RGS(1)LPDNSILHR	_RGS(ph)LPDNSILHR_	3	482.24	728
A0A087WSJ2	Calcium-activated potassium channel subunit alpha-1	Kcnma1	1	2	T	0.000717728	RLEDEQPPT(1)LS(1)PK	_RLEDEQPPT(ph)LS(ph)PK_	2	835.365	709
A2A699	Protein FAM171A2	Fam171a2	1	2;3	T	1.34592e-11	RDS(1)LT(1)S(1)PEDELGAEVGDEAGDKK	_RDS(ph)LT(ph)S(ph)PEDELGAEVGDEAGDKK_	3	886.68	787
Q52KI8	Serine/arginine repetitive matrix protein 1	Srrm1	1	2	T	1.5409e-75	KET(1)ES(1)EAEDDNLDDLER	_KET(ph)ES(ph)EAEDDNLDDLER_	3	723.27	913
Q0VF55		Atp2b3	1	1	T	7.785e-20	EAGHGPGKDEMT(1)DEELAEGEEEIDHAER	_EAGHGPGKDEMT(ph)DEELAEGEEEIDHAER_	3	1054.09	1079
A2AR02	Peptidyl-prolyl cis-trans isomerase G	Ppig	1	2	T	0.0159699	S(1)ET(1)PPHWR	_S(ph)ET(ph)PPHWR_	2	585.212	356
A2ARP8	Microtubule-associated protein 1A	Mtap1a	1	1	T	1.20222e-07	EAELT(1)PENIAAAR	_EAELT(ph)PENIAAAR_	2	732.84	871
A2AWA9	Rab GTPase-activating protein 1	Rabgap1	1	1	T	1.18589e-26	GVSDEDT(1)DEEKETLK	_GVSDEDT(ph)DEEKETLK_	2	887.867	991
B2RUJ5	Amyloid beta A4 precursor protein-binding family A member 1	Apba1	1	2	T	0.0339271	AAEDMPEAEQDLERAPT(1)PGGGHPDS(1)PGLPAPAGQQQR	_AAEDMPEAEQDLERAPT(ph)PGGGHPDS(ph)PGLPAPAGQQQR_	4	985.177	309
H3BIV5	A-kinase anchor protein 5	Akap5	1	1	T	4.11723e-08	SSAIQMGT(1)PELEK	_SSAIQMGT(ph)PELEK_	2	735.831	227
F6ZGR6		D430041D05Rik	1	2	T	2.81209e-11	NVT(1)AS(1)DEEEGAGLFDSAGK	_NVT(ph)AS(ph)DEEEGAGLFDSAGK_	2	1028.89	1161
D3Z183	Major facilitator superfamily domain-containing protein 6	Mfsd6	1	1	T	2.86138e-16	VAILT(1)DDEEEQKRK	_VAILT(ph)DDEEEQKRK_	3	585.284	11
E9PUJ6	Probable E3 ubiquitin-protein ligase MYCBP2	Mycbp2	1	1	T	6.64144e-27	LISGDAEPT(1)PEQEEK	_LISGDAEPT(ph)PEQEEK_	2	861.877	3992
E9Q1G8	Septin-7	2015-09-07	1	1	T	4.60487e-05	IYEFPET(1)DDEEENK	_IYEFPET(ph)DDEEENK_	2	919.356	228
P70704	Probable phospholipid-transporting ATPase IA	Atp8a1	1	3	T	5.00169e-39	TDDVS(1)EKT(1)S(1)LADQEEVR	_TDDVS(ph)EKT(ph)S(ph)LADQEEVR_	2	1081.4	28
G3XA19		Ephx3	1	3	T	0.013318	KDMPEFVVT(1)ALLAPS(1)RLS(1)LK	_KDMPEFVVT(ph)ALLAPS(ph)RLS(ph)LK_	3	819.055	64
O54774	AP-3 complex subunit delta-1	Ap3d1	1	3	T	4.074e-22	HS(0.007)S(0.993)LPT(1)ES(1)DEDIAPAQR	_HSS(ph)LPT(ph)ES(ph)DEDIAPAQR_	2	1046.89	758
P11798	Calcium/calmodulin-dependent protein kinase type II subunit alpha	Camk2a	1	1;2;3;4	T	7.1856e-79	ESS(0.004)ES(0.994)T(0.002)NT(1)T(1)IEDEDTKVR	_ESSES(ph)TNT(ph)T(ph)IEDEDTKVR_	2	1140.91	336
P11798	Calcium/calmodulin-dependent protein kinase type II subunit alpha	Camk2a	1	1;2;3;4	T	1.47298e-79	ESS(0.004)ES(0.994)T(0.002)NT(1)T(1)IEDEDTKVR	_ESSES(ph)TNT(ph)T(ph)IEDEDTKVR_	2	1140.91	337
P20357	Microtubule-associated protein 2	Map2	1	1;2	T	1.83127e-57	DGS(1)PDAPAT(1)PEKEEVAFSEYK	_DGS(ph)PDAPAT(ph)PEKEEVAFSEYK_	2	1213.99	1358
P38647	Stress-70 protein, mitochondrial	Hspa9	1	2	T	0.0227526	S(1)DIGEVILVGGMT(1)R	_S(ph)DIGEVILVGGMT(ph)R_	2	803.851	390
P46096	Synaptotagmin-1	Syt1	1	1	T	1.40338e-85	DDDAETGLT(1)DGEEKEEPKEEEK	_DDDAETGLT(ph)DGEEKEEPKEEEK_	3	858.348	128
P63216	Guanine nucleotide-binding protein G(I)/G(S)/G(O) subunit gamma-3	Gng3	1	1	T	8.86309e-14	GET(1)PVNSTMSIGQAR	_GET(ph)PVNSTMSIGQAR_	2	814.361	5
P63318	Protein kinase C gamma type	Prkcg	1	1	T	0.00716111	AAPALT(1)PPDR	_AAPALT(ph)PPDR_	2	544.76	655
Q3TXS7	26S proteasome non-ATPase regulatory subunit 1	Psmd1	1	2	T	5.67478e-49	TASAVAGKT(1)PDAS(1)PEPKDQTLK	_TASAVAGKT(ph)PDAS(ph)PEPKDQTLK_	3	791.364	311
Q3USB7	Inactive phospholipase C-like protein 1	Plcl1	1	1	T	1.56168e-17	KLPSESDLLEGEVT(1)DEDEEAEMSR	_KLPSESDLLEGEVT(ph)DEDEEAEMSR_	3	930.063	557
Q80TL4	Protein KIAA1045	Kiaa1045	1	1	T	4.12991e-27	RGT(1)VEGSVQEVQEEK	_RGT(ph)VEGSVQEVQEEK_	2	877.901	47
Q8BG39	Synaptic vesicle glycoprotein 2B	Sv2b	1	2	T	3.29544e-35	SNEQNQEEDAQS(1)DVT(1)EGHDEEDEIYEGEYQGIPHPDDVK	_SNEQNQEEDAQS(ph)DVT(ph)EGHDEEDEIYEGEYQGIPHPDDVK_	3	1545.6	36
Q8BJF9	Charged multivesicular body protein 2b	Chmp2b	1	2	T	0.0122425	T(1)LQT(1)MQNFQKENMK	_T(ph)LQT(ph)M(ox)QNFQKENM(ox)K_	2	966.885	121
Q8BJF9	Charged multivesicular body protein 2b	Chmp2b	1	2	T	0.0122425	T(1)LQT(1)MQNFQKENMK	_T(ph)LQT(ph)M(ox)QNFQKENM(ox)K_	2	966.885	124
Q8BTI8	Serine/arginine repetitive matrix protein 2	Srrm2	1	3	T	0.00184216	S(1)LT(1)RS(1)PPAIR	_S(ph)LT(ph)RS(ph)PPAIR_	2	669.274	2021
Q8BTI8	Serine/arginine repetitive matrix protein 2	Srrm2	1	2	T	0.04085	S(1)RT(1)PLLPR	_S(ph)RT(ph)PLLPR_	2	550.257	1986
S4R291	Ankyrin-2	Ank2	1	1	T	5.61028e-14	RFT(1)PEEEMFK	_RFT(ph)PEEEMFK_	2	697.297	2537
Q91XV3	Brain acid soluble protein 1	Basp1	1	1;2;3	T	6.34469e-27	AEGAGT(1)EEEGT(0.998)PKES(0.002)EPQAAADATEVK	_AEGAGT(ph)EEEGT(ph)PKESEPQAAADATEVK_	2	1431.58	31
Q91XV3	Brain acid soluble protein 1	Basp1	1	1;2;3	T	3.61598e-89	AEGAGTEEEGT(1)PKES(1)EPQAAADATEVK	_AEGAGTEEEGT(ph)PKES(ph)EPQAAADATEVK_	3	954.725	36
Q9EQF6	Dihydropyrimidinase-related protein 5	Dpysl5	1	2	T	8.89682e-15	EMGT(1)PLADT(0.997)PT(0.003)RPVTR	_EMGT(ph)PLADT(ph)PTRPVTR_	2	951.415	509
Q9JIS5	Synaptic vesicle glycoprotein 2A	Sv2a	1	2;3	T	2.86782e-45	GEGAQDEEEGGAS(1)S(1)DAT(1)EGHDEDDEIYEGEYQGIPR	_GEGAQDEEEGGAS(ph)S(ph)DAT(ph)EGHDEDDEIYEGEYQGIPR_	3	1361.15	84
Q9WV18	Gamma-aminobutyric acid type B receptor subunit 1	Gabbr1	1	1	T	0.00277014	HPPT(1)PPDPSGGLPR	_HPPT(ph)PPDPSGGLPR_	3	502.236	929
Q9Z0P4	Paralemmin-1	Palm	1	2	T	6.15572e-15	SETLVNAQQT(1)PLGT(1)PK	_SETLVNAQQT(ph)PLGT(ph)PK_	2	922.416	141
Q9Z0P4	Paralemmin-1	Palm	1	1;2	T	3.14385e-15	SETLVNAQQT(1)PLGT(1)PK	_SETLVNAQQT(ph)PLGT(ph)PK_	2	922.416	145
Q9Z2Q6	Septin-5	2015-09-05	1	1	T	7.44465e-12	LAT(1)PEDKQDIDK	_LAT(ph)PEDKQDIDK_	2	726.835	13
O08852	Polycystin-1	Pkd1	1	2	Y	0.0171643	VLLEALY(1)FS(1)LVAK	_VLLEALY(ph)FS(ph)LVAK_	2	813.403	3604
Q5QNV8	Uncharacterized protein C17orf66 homolog	Gm11435	1	3	Y	0.0688317	LEAPAFS(1)FY(1)FS(1)KPKK	_LEAPAFS(ph)FY(ph)FS(ph)KPKK_	3	667.285	532
Q8C428	Transmembrane channel-like protein 7	Tmc7	1	1	Y	0.0610374	Y(1)ELRADLEEER	_Y(ph)ELRADLEEER_	3	501.556	330
Q8VDM1	Zinc finger CCCH-type with G patch domain-containing protein	Zgpat	1	3	Y	0.0547709	VLY(1)LY(1)PT(1)HK	_VLY(ph)LY(ph)PT(ph)HK_	2	687.271	168
Q8VDM1	Zinc finger CCCH-type with G patch domain-containing protein	Zgpat	1	3	Y	0.0547709	VLY(1)LY(1)PT(1)HK	_VLY(ph)LY(ph)PT(ph)HK_	2	687.271	170
Q99JP7	Gamma-glutamyltransferase 7	Ggt7	0.999999	2	S	7.47958e-22	LPSSSSEMGS(1)QDGS(1)PLR	_LPSSSSEMGS(ph)QDGS(ph)PLR_	2	947.868	79
B2RUJ5	Amyloid beta A4 precursor protein-binding family A member 1	Apba1	0.999999	2;3	S	1.62331e-19	LHHYDERS(1)DGES(1)DS(1)PEKEAEFAPYPR	_LHHYDERS(ph)DGES(ph)DS(ph)PEKEAEFAPYPR_	3	1101.09	250
D3Z5K8	SH3 and multiple ankyrin repeat domains protein 2	Shank2	0.999999	2	S	0.000300353	RAPS(1)PVVS(0.965)PT(0.035)ELSK	_RAPS(ph)PVVS(ph)PTELSK_	2	814.378	1699
O35927	Catenin delta-2	Ctnnd2	0.999999	2	S	3.2019e-06	T(0.002)PS(0.238)IS(0.761)PVRVS(1)PNNR	_TPSIS(ph)PVRVS(ph)PNNR_	2	842.384	1087
E9QN63	Arf-GAP with SH3 domain, ANK repeat and PH domain-containing protein 1	Asap1	0.999999	1	S	3.08898e-17	QDEMDES(1)DDDLDDKPSPIKK	_QDEMDES(ph)DDDLDDKPSPIKK_	3	800.665	732
F8WGL3	Cofilin-1	Cfl1	0.999999	1	S	0.0302298	AS(1)GVAVSDGVIK	_(ac)AS(ph)GVAVSDGVIK_	2	612.797	3
P09405	Nucleolin	Ncl	0.999999	1	S	7.19979e-08	GLS(1)EDTTEETLK	_GLS(ph)EDTTEETLK_	2	701.803	577
P12961	Neuroendocrine protein 7B2	Scg5	0.999999	1	S	2.85307e-05	SVPHFS(1)EEEKEAE	_SVPHFS(ph)EEEKEAE_	2	799.325	205
P14873	Microtubule-associated protein 1B	Map1b	0.999999	1	S	0.000149025	SDIS(1)PLTPR	_SDIS(ph)PLTPR_	2	533.252	1781
P63318	Protein kinase C gamma type	Prkcg	0.999999	1;2;3;4	S	3.39919e-54	MGPSSSPIPS(1)PS(1)PS(0.999)PT(0.001)DSKR	_MGPSSSPIPS(ph)PS(ph)PS(ph)PTDSKR_	2	1126.44	328
P97427	Dihydropyrimidinase-related protein 1	Crmp1	0.999999	1	S	0.0105817	S(1)IPHITSDR	_S(ph)IPHITSDR_	2	553.256	8
Q0VF59	Disks large-associated protein 2	Dlgap2	0.999999	1	S	0.00107622	ADS(1)IEIYIPEAQTR	_ADS(ph)IEIYIPEAQTR_	2	843.393	1048
Q3B7Z2	Oxysterol-binding protein 1	Osbp	0.999999	2	S	3.45857e-10	MLAES(1)DDS(1)GDEESVSQTDKTELQSTLR	_MLAES(ph)DDS(ph)GDEESVSQTDKTELQSTLR_	3	1044.43	188
Q3UHD6	Sorting nexin-27	Snx27	0.999999	1	S	7.35454e-20	SES(1)GYGFNVR	_SES(ph)GYGFNVR_	2	598.243	49
Q3UHK1	Proton myo-inositol cotransporter	Slc2a13	0.999999	1	S	0.000547125	GSNYHLSDNDAS(1)DVE	_GSNYHLSDNDAS(ph)DVE_	2	851.815	634
Q64332	Synapsin-2	Syn2	0.999999	1;2	S	8.09693e-47	TPALS(1)PQRPLTTQQPQSGTLKEPDSSK	_TPALS(ph)PQRPLTTQQPQSGTLKEPDSSK_	3	991.496	426
Q6NXI6	Regulation of nuclear pre-mRNA domain-containing protein 2	Rprd2	0.999999	1	S	6.29261e-21	DVEDMELS(1)DVEDDGSK	_DVEDMELS(ph)DVEDDGSK_	2	931.848	392
Q6PDG8	Vacuolar fusion protein MON1 homolog A	Mon1a	0.999999	1	S	2.80099e-14	S(1)YEDLTELEDR	_S(ph)YEDLTELEDR_	2	725.293	56
Q6PGL7	WASH complex subunit FAM21	Fam21	0.999999	1	S	1.32637e-11	GLFS(1)DEEDSEDLFSSQSSSKPK	_GLFS(ph)DEEDSEDLFSSQSSSKPK_	3	833.686	533
Q6PGL7	WASH complex subunit FAM21	Fam21	0.999999	1	S	1.10281e-25	VPLLFS(1)DEEDSEVPSGVKPEDLK	_VPLLFS(ph)DEEDSEVPSGVKPEDLK_	3	870.414	723
Q8BX70	Vacuolar protein sorting-associated protein 13C	Vps13c	0.999999	2	S	1.48938e-17	ALLGTSLLLDGVES(1)ES(1)DEEFFDAEDGDSQAAR	_ALLGTSLLLDGVES(ph)ES(ph)DEEFFDAEDGDSQAAR_	3	1182.83	871
Q8C079	Protein FAM40A	Fam40a	0.999999	1	S	1.74481e-30	AAS(1)PPASASDLIEQQQK	_AAS(ph)PPASASDLIEQQQK_	2	910.925	335
Q8C1D8	Protein IWS1 homolog	Iws1	0.999999	2	S	0.000141992	AAVLS(1)DS(1)EDDAGNASAK	_AAVLS(ph)DS(ph)EDDAGNASAK_	2	890.837	343
S4R291	Ankyrin-2	Ank2	0.999999	1;2	S	0.00261252	S(0.23)DS(0.77)NAS(1)FLR	_SDS(ph)NAS(ph)FLR_	2	578.707	34
Q8JZW4	Copine-5	Cpne5	0.999999	3;4	S	4.961e-07	PRPPPAAPAQS(1)PPQS(1)PAHS(1)PPGS(0.999)PVHT(0.002)HI	_PRPPPAAPAQS(ph)PPQS(ph)PAHS(ph)PPGS(ph)PVHTHI_	3	1078.12	579
Q8K310	Matrin-3	Matr3	0.999999	1	S	2.41867e-26	RDS(1)FDDRGPSLNPVLDYDHGSR	_RDS(ph)FDDRGPSLNPVLDYDHGSR_	3	866.717	188
Q99P72	Reticulon-4	Rtn4	0.999999	1	S	8.372e-20	DDS(1)PKEYTDLEVSNK	_DDS(ph)PKEYTDLEVSNK_	2	910.385	857
Q9Z2H5	Band 4.1-like protein 1	Epb41l1	0.999999	2	S	2.86018e-07	RLPSSPAS(1)PS(1)PK	_RLPSSPAS(ph)PS(ph)PK_	2	692.307	546
B2RW11		Ankrd34a	0.999999	1	T	0.000430789	RNT(1)APEAQESGLPSGLR	_RNT(ph)APEAQESGLPSGLR_	3	621.63	315
D3Z7R4		Syt1	0.999999	1	T	6.42793e-106	DQDDDAETGLT(1)DGEEKEEPKEEEK	_DQDDDAETGLT(ph)DGEEKEEPKEEEK_	2	1408.56	125
A0A087WS83	Voltage-dependent R-type calcium channel subunit alpha-1E	Cacna1e	0.999998	1	S	4.40505e-10	EVS(1)PMSAPNMPSIER	_EVS(ph)PMSAPNMPSIER_	2	862.873	737
F6ZKC7		Cstf2	0.999998	1	S	2.05625e-11	GQGTLQHS(1)PVGPAGPASIER	_GQGTLQHS(ph)PVGPAGPASIER_	2	1019.99	145
A2ARP8	Microtubule-associated protein 1A	Mtap1a	0.999998	1;2	S	1.34438e-25	MAS(1)PPPSGPPSAAHT(0.045)PFHQS(0.954)PVEEK	_MAS(ph)PPPSGPPSAAHTPFHQS(ph)PVEEK_	3	915.059	1229
A2AWA9	Rab GTPase-activating protein 1	Rabgap1	0.999998	1	S	6.8471e-10	GVS(1)DEDTDEEKETLK	_GVS(ph)DEDTDEEKETLK_	2	887.867	987
Q5DTL9	Sodium-driven chloride bicarbonate exchanger	Slc4a10	0.999998	1	S	7.21938e-45	ERDSGLEDGRES(1)PSFDTPSQR	_ERDSGLEDGRES(ph)PSFDTPSQR_	3	815.682	89
B2RQ80	Traf2 and NCK-interacting protein kinase	Tnik	0.999998	1	S	6.98874e-05	QNS(1)DPTSENPPLPTR	_QNS(ph)DPTSENPPLPTR_	2	866.881	640
B2RRE2	Unconventional myosin-XVIIIa	Myo18a	0.999998	2	S	1.12898e-57	FSHSYLS(1)DS(1)DTEAK	_FSHSYLS(ph)DS(ph)DTEAK_	2	873.818	2034
Q9ES28	Rho guanine nucleotide exchange factor 7	Arhgef7	0.999998	1	S	0.0118719	MS(1)GFIYQGK	_M(ox)S(ph)GFIYQGK_	2	563.736	497
E9PW07	Protein Dos	Dos	0.999998	1	S	2.37012e-11	GAGDEVSELPAPARS(1)PPR	_GAGDEVSELPAPARS(ph)PPR_	2	943.444	527
Q9QVP9	Protein-tyrosine kinase 2-beta	Ptk2b	0.999998	1	S	0.000123977	RNS(1)LPQIPTLNLEAR	_RNS(ph)LPQIPTLNLEAR_	3	601.316	375
E9Q8P8	Protein FAM131B	Fam131b	0.999998	1	S	1.08914e-34	KVSDVTSSGVQS(1)FDEEEGDANN	_KVSDVTSSGVQS(ph)FDEEEGDANN_	2	1197.48	350
O08539	Myc box-dependent-interacting protein 1	Bin1	0.999998	2;3	S	4.92122e-54	GNKS(1)PS(1)PPPDGS(1)PAATPEIR	_GNKS(ph)PS(ph)PPPDGS(ph)PAATPEIR_	3	738.967	304
O88737	Protein bassoon	Bsn	0.999998	1;2;3	S	6.98745e-20	SQAS(1)EEESPVSPLGR	_SQAS(ph)EEESPVSPLGR_	2	826.862	3512
P47809	Dual specificity mitogen-activated protein kinase kinase 4	Map2k4	0.999998	1	S	0.000168914	LKIS(1)PEQHWDFTAEDLK	_LKIS(ph)PEQHWDFTAEDLK_	3	713.005	88
Q5U3K5	Rab-like protein 1	Parf	0.999998	1;2	S	1.08098e-71	NISLS(1)S(1)EEEAEGLAGHPR	_NISLS(ph)S(ph)EEEAEGLAGHPR_	2	1028.42	483
Q8BX70	Vacuolar protein sorting-associated protein 13C	Vps13c	0.999998	2	S	1.48938e-17	ALLGTSLLLDGVES(1)ES(1)DEEFFDAEDGDSQAAR	_ALLGTSLLLDGVES(ph)ES(ph)DEEFFDAEDGDSQAAR_	3	1182.83	873
Q8R4E6	Purine-rich element-binding protein gamma	Purg	0.999998	3	S	3.87371e-26	HS(0.001)APS(0.999)PPVS(1)VGS(1)EEHPHSVLK	_HSAPS(ph)PPVS(ph)VGS(ph)EEHPHSVLK_	3	806.669	166
Q99KH8	Serine/threonine-protein kinase 24	Stk24	0.999998	1	S	1.82085e-20	AHS(1)PVQSGLPGMQNLK	_(ac)AHS(ph)PVQSGLPGMQNLK_	2	893.421	4
Q9Z2H5	Band 4.1-like protein 1	Epb41l1	0.999998	1;2	S	1.54658e-06	S(1)LDGAEFSR	_S(ph)LDGAEFSR_	2	531.219	430
E9Q401	Ryanodine receptor 2	Ryr2	0.999998	1	T	4.4882e-25	EAAVPEEEGGT(1)PEKEISIEDAK	_EAAVPEEEGGT(ph)PEKEISIEDAK_	2	1204.54	1864
Q3U2G2	Heat shock 70 kDa protein 4	Hspa4	0.999998	1	T	1.92278e-25	MQVDQEEPHTEEQQQQPQT(1)PAENK	_MQVDQEEPHTEEQQQQPQT(ph)PAENK_	3	977.082	540
E9QAD8	IQ motif and SEC7 domain-containing protein 2	Iqsec2	0.999997	1	S	0.00163448	MQFS(1)FEEYEK	_MQFS(ph)FEEYEK_	2	709.273	393
E9PV22	Leucine-rich repeat-containing protein 47	Lrrc47	0.999997	1	S	0.0146611	KQHRES(1)GEGEEEVADSAR	_KQHRES(ph)GEGEEEVADSAR_	3	698.634	315
E9Q4Z6	Double zinc ribbon and ankyrin repeat-containing protein 1	6330439K17Rik	0.999997	1	S	0.00739674	FTQGLEDQLS(1)PPGNR	_FTQGLEDQLS(ph)PPGNR_	2	869.893	769
O88703	Potassium/sodium hyperpolarization-activated cyclic nucleotide-gated channel 2	Hcn2	0.999997	2	S	7.65547e-11	RAPPGPLPPAASPGPPAAS(1)PPAAPS(0.529)S(0.471)PR	_RAPPGPLPPAASPGPPAAS(ph)PPAAPS(ph)SPR_	3	910.105	750
Q0VBL3		Rbm15	0.999997	2	S	1.5378e-13	S(1)RS(1)PLDKDAYAPSSSVVGTSVGSHR	_S(ph)RS(ph)PLDKDAYAPSSSVVGTSVGSHR_	3	907.407	258
Q60902	Epidermal growth factor receptor substrate 15-like 1	Eps15l1	0.999997	1	S	1.76131e-07	GIDPPQVLS(1)PDMVPPSER	_GIDPPQVLS(ph)PDMVPPSER_	2	1007.47	353
Q9ESX5	H/ACA ribonucleoprotein complex subunit 4	Dkc1	0.999997	1	S	2.82975e-11	TVLES(1)GGETGDGDNDTTK	_TVLES(ph)GGETGDGDNDTTK_	2	938.378	481
S4R1F9			0.999997	2	S	0.00242438	QS(0.002)DS(0.998)NAS(1)FLR	_QSDS(ph)NAS(ph)FLR_	2	642.737	30
B1ART2		Vps13d	0.999996	1	S	1.13344e-06	EKDDVS(1)PQPLMTDLER	_EKDDVS(ph)PQPLMTDLER_	2	976.937	1139
Q68FL4	Putative adenosylhomocysteinase 3	Ahcyl2	0.999996	1	S	3.48703e-24	DGGEALVS(1)PDGTVTEAPR	_DGGEALVS(ph)PDGTVTEAPR_	2	925.912	109
P19246	Neurofilament heavy polypeptide	Nefh	0.999996	1	S	0.000210945	HPTDIRPPEQVKS(1)PAK	_HPTDIRPPEQVKS(ph)PAK_	3	627.319	859
Q0VBL3		Rbm15	0.999996	2	S	1.5378e-13	S(1)RS(1)PLDKDAYAPSSSVVGTSVGSHR	_S(ph)RS(ph)PLDKDAYAPSSSVVGTSVGSHR_	3	907.407	256
Q5EBJ4	Ermin	Ermn	0.999996	1	S	0.0207238	EGS(1)PLKEESLAR	_EGS(ph)PLKEESLAR_	2	698.329	211
P14873	Microtubule-associated protein 1B	Map1b	0.999996	1	T	0.00370937	DLTGQVPT(1)PPVK	_DLTGQVPT(ph)PPVK_	2	666.334	527
A2AIR7	Voltage-dependent N-type calcium channel subunit alpha-1B	Cacna1b	0.999995	1	S	0.0059771	IGS(1)DPYLGQR	_IGS(ph)DPYLGQR_	2	593.269	2245
Q9D0L8	mRNA cap guanine-N7 methyltransferase	Rnmt	0.999995	1;2	S	1.04549e-25	ASVASDPES(1)PPGGNEPAAASGQR	_ASVASDPES(ph)PPGGNEPAAASGQR_	2	1116.48	15
D3Z0M6	Cytoplasmic dynein 1 intermediate chain 1	Dync1i1	0.999995	1	S	1.65063e-106	ETQTPLATHQS(1)EEDEEDEEMVEPK	_ETQTPLATHQS(ph)EEDEEDEEMVEPK_	2	1441.08	179
O55022	Membrane-associated progesterone receptor component 1	Pgrmc1	0.999995	1	S	1.6686e-82	EGEEPTVYS(1)DDEEPKDETAR	_EGEEPTVYS(ph)DDEEPKDETAR_	3	792.651	181
P16014	Secretogranin-1	Chgb	0.999995	1	S	3.67133e-20	WTEGGGHS(1)REGVDDQESLRPSNQQASK	_WTEGGGHS(ph)REGVDDQESLRPSNQQASK_	4	759.586	129
P55821	Stathmin-2	Stmn2	0.999995	2	S	0.00985119	RAS(1)GQAFELILKPPS(0.934)PIS(0.066)EAPR	_RAS(ph)GQAFELILKPPS(ph)PISEAPR_	3	842.084	50
Q5QNQ6	Oxysterol-binding protein 2	Osbp2	0.999995	1;2	S	8.44455e-15	T(0.043)QS(0.957)DDS(1)GDDDEEPAAPADNSELHHTLK	_TQS(ph)DDS(ph)GDDDEEPAAPADNSELHHTLK_	3	1018.72	284
Q78ZA7	Nucleosome assembly protein 1-like 4	Nap1l4	0.999995	1	S	3.28411e-25	REFITGDVEPTDAESAWHS(1)ENEEEDK	_REFITGDVEPTDAESAWHS(ph)ENEEEDK_	3	1034.09	125
S4R291	Ankyrin-2	Ank2	0.999995	1;2	S	2.51919e-06	T(0.007)EGDS(0.993)PAAALS(1)PQMHQEPVQQDFSGK	_TEGDS(ph)PAAALS(ph)PQMHQEPVQQDFSGK_	3	972.403	3687
Q8VD37	SH3-containing GRB2-like protein 3-interacting protein 1	Sgip1	0.999995	1	S	4.10117e-11	NLS(1)SEEVARPR	_NLS(ph)SEEVARPR_	2	669.314	169
Q3UHJ0	AP2-associated protein kinase 1	Aak1	0.999995	1;2	T	7.97214e-10	VGSLT(1)PPS(0.5)S(0.5)PK	_VGSLT(ph)PPS(ph)SPK_	2	615.264	618
P61807	Stannin	Snn	0.999994	1	S	4.93167e-07	LMTANS(1)PEVHG	_LMTANS(ph)PEVHG_	2	618.26	83
P63318	Protein kinase C gamma type	Prkcg	0.999994	2;3;4	S	3.39919e-54	MGPSSSPIPS(1)PS(1)PS(0.999)PT(0.001)DSKR	_MGPSSSPIPS(ph)PS(ph)PS(ph)PTDSKR_	2	1126.44	326
Q9Z2H5	Band 4.1-like protein 1	Epb41l1	0.999994	2	S	2.86018e-07	LPSSPAS(1)PS(1)PK	_LPSSPAS(ph)PS(ph)PK_	2	614.257	544
E0CXB9	Catenin alpha-2	Ctnna2	0.999994	2;3	T	4.21271e-17	S(0.006)RT(0.203)S(0.79)VQT(1)EDDQLIAGQSAR	_SRTS(ph)VQT(ph)EDDQLIAGQSAR_	2	1111.48	670
A2ARP8	Microtubule-associated protein 1A	Mtap1a	0.999993	1	S	1.4705e-45	KVAELEEEQS(1)QGSSSYSDWVK	_KVAELEEEQS(ph)QGSSSYSDWVK_	2	1233.54	352
A2ARP8	Microtubule-associated protein 1A	Mtap1a	0.999993	1	S	3.31869e-35	SHWDDGTNDS(1)DLEK	_SHWDDGTNDS(ph)DLEK_	2	849.818	2320
A2RSJ4	UHRF1-binding protein 1-like	Uhrf1bp1l	0.999993	2	S	6.88766e-08	NLGS(1)PPKS(0.781)PT(0.217)HAS(0.001)PQHTQTEK	_NLGS(ph)PPKS(ph)PTHASPQHTQTEK_	3	801.356	414
O88737	Protein bassoon	Bsn	0.999993	1	S	1.54087e-07	DYLS(1)DSELNQLR	_DYLS(ph)DSELNQLR_	2	766.835	3022
P35436	Glutamate [NMDA] receptor subunit epsilon-1	Grin2a	0.999993	2	S	9.30587e-05	KKS(1)PDFNLT(0.081)GS(0.911)QS(0.009)NMLK	_KKS(ph)PDFNLTGS(ph)QSNMLK_	3	685.639	882
Q8C0T5	Signal-induced proliferation-associated 1-like protein 1	Sipa1l1	0.999993	1	S	2.01712e-11	TLS(1)DESIYSSQR	_TLS(ph)DESIYSSQR_	2	733.314	1564
Q8R464	Cell adhesion molecule 4	Cadm4	0.999993	1	S	4.86191e-79	GSYLTHEAS(1)GLDEQGEAR	_GSYLTHEAS(ph)GLDEQGEAR_	2	1000.42	361
Q99NE5	Regulating synaptic membrane exocytosis protein 1	Rims1	0.999993	1	S	8.64831e-05	LQTHDESSLPLPQPS(1)PFMPR	_LQTHDESSLPLPQPS(ph)PFMPR_	3	786.371	716
A2AMI2	Eukaryotic translation initiation factor 4 gamma 3	Eif4g3	0.999992	1;2	S	1.63508e-15	EMQDKAES(1)ES(1)DGQAEETADPQSLHSGR	_EMQDKAES(ph)ES(ph)DGQAEETADPQSLHSGR_	3	1031.4	470
A2AMI2	Eukaryotic translation initiation factor 4 gamma 3	Eif4g3	0.999992	1;2	S	1.63508e-15	EMQDKAES(1)ES(1)DGQAEETADPQSLHSGR	_EMQDKAES(ph)ES(ph)DGQAEETADPQSLHSGR_	3	1031.4	472
P51830	Adenylate cyclase type 9	Adcy9	0.999992	1	S	1.4679e-24	GQGTAS(1)PGSVSDLAQTVK	_GQGTAS(ph)PGSVSDLAQTVK_	2	891.917	610
G3X9G2	Misshapen-like kinase 1	Mink1	0.999992	1	S	3.30736e-07	SDSVLPASHGHLPQAGS(1)LER	_SDSVLPASHGHLPQAGS(ph)LER_	3	713.339	766
P63318	Protein kinase C gamma type	Prkcg	0.999992	1	S	0.0013747	RGS(1)DELYAIK	_RGS(ph)DELYAIK_	2	616.29	373
P16283	Anion exchange protein 3	Slc4a3	0.999991	1	S	9.37219e-16	FSIGS(1)DEDDSPGLPVK	_FSIGS(ph)DEDDSPGLPVK_	2	871.88	170
P14873	Microtubule-associated protein 1B	Map1b	0.999991	2	S	7.28264e-05	SLMS(1)S(1)PEDLTK	_SLMS(ph)S(ph)PEDLTK_	2	684.264	828
Q60598	Src substrate cortactin	Cttn	0.999991	1;2	T	3.37203e-20	KQT(1)PPASPSPQPIEDRPPSSPIYEDAAPFK	_KQT(ph)PPASPSPQPIEDRPPSSPIYEDAAPFK_	3	1109.87	401
Q8K019	Bcl-2-associated transcription factor 1	Bclaf1	0.99999	1	S	0.000870261	SIFREES(1)PLR	_SIFREES(ph)PLR_	2	657.316	529
D3YTL8	Protein spire homolog 1	Spire1	0.99999	1	S	1.44155e-12	S(1)VDKSDEELQFPK	_S(ph)VDKSDEELQFPK_	2	801.358	565
H3BJD6		Ppp1r9a	0.99999	2	S	1.41627e-07	GSSDSLDS(1)LS(1)PR	_GSSDSLDS(ph)LS(ph)PR_	2	690.758	190
H7BX95	Serine/arginine-rich splicing factor 1	Srsf1	0.99999	2	S	4.01739e-08	VKVDGPRS(1)PS(1)YGR	_VKVDGPRS(ph)PS(ph)YGR_	2	789.347	201
P16388	Potassium voltage-gated channel subfamily A member 1	Kcna1	0.99999	1	S	2.26765e-09	TVMSGENADEASTAPGHPQDGS(1)YPR	_TVMSGENADEASTAPGHPQDGS(ph)YPR_	3	885.366	23
Q8BHS6	Armadillo repeat-containing X-linked protein 3	Armcx3	0.99999	1	S	8.14793e-15	YNDWS(1)DDDDDSNESK	_YNDWS(ph)DDDDDSNESK_	2	942.808	61
Q8C1D8	Protein IWS1 homolog	Iws1	0.99999	2	S	0.000141992	AAVLS(1)DS(1)EDDAGNASAK	_AAVLS(ph)DS(ph)EDDAGNASAK_	2	890.837	345
Q9QYX7	Protein piccolo	Pclo	0.99999	1	S	1.17167e-52	ASYDSVEDSSESENS(1)PVAR	_ASYDSVEDSSESENS(ph)PVAR_	2	1054.92	1457
Q9DBS2	Tumor protein p63-regulated gene 1-like protein	Tprg1l	0.99999	1	T	1.82598e-39	DTVDSAGTSPTAVLAAGEDAGAGRPGAGT(1)PLR	_DTVDSAGTSPTAVLAAGEDAGAGRPGAGT(ph)PLR_	3	1006.81	34
O70435	Proteasome subunit alpha type-3	Psma3	0.999989	1	S	1.24995e-08	ESLKEEDES(1)DDDNM	_ESLKEEDES(ph)DDDNM_	2	868.298	250
Q2PFD7	PH and SEC7 domain-containing protein 3	Psd3	0.999989	2;3	S	3.84622e-146	SHS(1)S(1)PSLNPDAS(1)PVTAK	_SHS(ph)S(ph)PSLNPDAS(ph)PVTAK_	2	967.87	1009
Q3TRR0	Microtubule-associated protein 9	Map9	0.999989	1	S	0.000176676	MNDFHIS(1)DDEEKNSPR	_MNDFHIS(ph)DDEEKNSPR_	3	671.938	79
P39447	Tight junction protein ZO-1	Tjp1	0.999988	1;2	S	5.0839e-15	VQIPVSHPDPEPVS(1)DNEDDS(1)YDEEVHDPR	_VQIPVSHPDPEPVS(ph)DNEDDS(ph)YDEEVHDPR_	3	1159.47	125
P20357	Microtubule-associated protein 2	Map2	0.999988	2	T	1.94064e-15	KET(1)S(0.999)PET(0.001)SLIQDEVALK	_KET(ph)S(ph)PETSLIQDEVALK_	2	1024.47	1160
Q80UU9	Membrane-associated progesterone receptor component 2	Pgrmc2	0.999988	1	T	4.14985e-34	LLKPGEEPSEYT(1)DEEDTKDHSK	_LLKPGEEPSEYT(ph)DEEDTKDHSK_	3	876.385	205
Q8C2Q7	Heterogeneous nuclear ribonucleoprotein H	Hnrnph1	0.999987	1	S	4.7308e-15	HTGPNS(1)PDTANDGFVR	_HTGPNS(ph)PDTANDGFVR_	2	882.87	104
Q8BTI8	Serine/arginine repetitive matrix protein 2	Srrm2	0.999987	3	S	3.94766e-05	HAS(1)S(0.999)S(0.984)PES(0.017)LKPTPAPGSR	_HAS(ph)S(ph)S(ph)PESLKPTPAPGSR_	2	1023.41	433
P34152	Focal adhesion kinase 1	Ptk2	0.999986	1	S	6.47546e-21	LQPQEIS(1)PPPTANLDR	_LQPQEIS(ph)PPPTANLDR_	2	928.451	948
Q80U58	Pumilio homolog 2	Pum2	0.999985	1	S	0.0006301	QAS(1)PTEVVER	_QAS(ph)PTEVVER_	2	598.271	181
Q6ZPF3	T-lymphoma invasion and metastasis-inducing protein 2	Tiam2	0.999985	1	S	1.02424e-05	QGS(1)PTKDIEIQFQR	_QGS(ph)PTKDIEIQFQR_	2	863.912	1604
Q2PFD7	PH and SEC7 domain-containing protein 3	Psd3	0.999983	1;2;3	S	3.84622e-146	SHS(1)S(0.998)PS(0.002)LNPDASPVTAK	_SHS(ph)S(ph)PSLNPDASPVTAK_	2	927.887	1000
P14873	Microtubule-associated protein 1B	Map1b	0.999983	1	S	9.335e-25	ESVVS(1)GDDRAEEDMDDVLEK	_ESVVS(ph)GDDRAEEDMDDVLEK_	3	773.317	992
Q923F1		Clns1a	0.999983	1	S	5.8558e-47	LGEESKEPLS(1)DEDEEDNDDVEPISEFR	_LGEESKEPLS(ph)DEDEEDNDDVEPISEFR_	3	1068.11	100
A0A087WSJ2	Calcium-activated potassium channel subunit alpha-1	Kcnma1	0.999982	2	S	0.0123254	S(0.453)S(0.547)PDNS(1)PVHGMLR	_SS(ph)PDNS(ph)PVHGMLR_	2	778.802	928
Q8BP27	Swi5-dependent recombination DNA repair protein 1 homolog	Sfr1	0.999982	1;2	S	1.42918e-15	ENPPS(1)PPT(0.091)S(0.909)PAAPQPR	_ENPPS(ph)PPTS(ph)PAAPQPR_	2	901.879	67
Q8VED9	Galectin-related protein A	Lgalsla	0.999982	1	S	0.0456118	AGS(1)VADSDAVVK	_(ac)AGS(ph)VADSDAVVK_	2	620.776	4
Q99LH9	SH3 domain-binding protein 5-like	Sh3bp5l	0.999981	1	S	1.76845e-32	GLSDHAS(1)LDGQELGAQSR	_GLSDHAS(ph)LDGQELGAQSR_	2	960.926	361
E9PV45	Ubiquitin carboxyl-terminal hydrolase	Usp24	0.99998	1	S	0.000482363	VSDQNS(1)PVLPK	_VSDQNS(ph)PVLPK_	2	632.303	2045
F6ZFU0	Elongation factor 1-delta	Eef1d	0.99998	1	S	4.97743e-08	ATAPQTQHVS(1)PMR	_ATAPQTQHVS(ph)PMR_	2	752.342	404
Q9CWU4	UPF0690 protein C1orf52 homolog		0.99998	1	S	2.38467e-17	LLPEGEETVES(1)DDDKDER	_LLPEGEETVES(ph)DDDKDER_	2	1078.45	156
Q80ZK9	WD and tetratricopeptide repeats protein 1	Wdtc1	0.999979	1	S	2.25856e-07	KDS(1)ISEDEMVLR	_KDS(ph)ISEDEMVLR_	2	751.334	511
Q65CL1	Catenin alpha-3	Ctnna3	0.999979	1	S	0.0103414	TPEELEDVS(1)DLEDDHEVR	_TPEELEDVS(ph)DLEDDHEVR_	3	736.306	637
Q3V1K7	Solute carrier organic anion transporter family member 2B1	Slco2b1	0.999978	1	S	1.86565e-10	KVS(1)VEPQDSHQDAQPR	_KVS(ph)VEPQDSHQDAQPR_	3	634.29	31
P39447	Tight junction protein ZO-1	Tjp1	0.999977	1;2	S	5.0839e-15	VQIPVSHPDPEPVS(1)DNEDDS(1)YDEEVHDPR	_VQIPVSHPDPEPVS(ph)DNEDDS(ph)YDEEVHDPR_	3	1159.47	131
F7BNZ5	Breast carcinoma-amplified sequence 1 homolog	Bcas1	0.999977	1;2	S	2.62906e-14	TPS(1)PPEPEPAGTAQK	_TPS(ph)PPEPEPAGTAQK_	2	793.859	271
P70441	Na(+)/H(+) exchange regulatory cofactor NHE-RF1	Slc9a3r1	0.999977	1;2	S	1.99646e-113	SASSDTSEELNSQDS(1)PKR	_SASSDTSEELNSQDS(ph)PKR_	2	1009.42	297
Q8BTI8	Serine/arginine repetitive matrix protein 2	Srrm2	0.999977	2	S	0.000950615	SLS(1)YS(1)PVER	_SLS(ph)YS(ph)PVER_	2	599.233	2648
O09126	Semaphorin-4D	Sema4d	0.999976	1	S	3.09083e-07	SDFS(1)DLEQSVK	_SDFS(ph)DLEQSVK_	2	667.779	782
Q9Z0P4	Paralemmin-1	Palm	0.999976	1;2	S	2.03459e-100	ENS(0.039)AAPS(0.138)PGRPQS(0.823)AS(1)PAKEEQK	_ENSAAPSPGRPQS(ph)AS(ph)PAKEEQK_	2	1213.52	124
Q8C996	Transmembrane protein 163	Tmem163	0.999975	1	S	2.35558e-13	ISES(1)GQFSDGLEDR	_ISES(ph)GQFSDGLEDR_	2	810.333	56
P08113	Endoplasmin	Hsp90b1	0.999974	1	S	6.55589e-07	TETVEEPLEEDEAAKEEKEES(1)DDEAAVEEEEEEK	_TETVEEPLEEDEAAKEEKEES(ph)DDEAAVEEEEEEK_	4	1001.66	306
A0A087WP33	Autophagy-related protein 9A	Atg9a	0.999973	1	S	1.67336e-25	LEASYSDS(1)PPGEEDLLVHVAEGSK	_LEASYSDS(ph)PPGEEDLLVHVAEGSK_	3	870.393	11
Q9QYC0	Alpha-adducin	Add1	0.999973	1;2;3	S	4.04462e-11	EKS(1)PPDQS(0.008)AVPNT(0.952)PPS(0.021)T(0.018)PVKLEEDLPQEPTSR	_EKS(ph)PPDQSAVPNT(ph)PPSTPVKLEEDLPQEPTSR_	3	1210.89	600
Q61036	Serine/threonine-protein kinase PAK 3	Pak3	0.999972	1	S	2.54329e-19	TASEPPLAPPVS(1)EEEDEEEEEEEDDNEPPPVIAPRPEHTK	_TASEPPLAPPVS(ph)EEEDEEEEEEEDDNEPPPVIAPRPEHTK_	4	1136.75	186
P14873	Microtubule-associated protein 1B	Map1b	0.999972	1;2	S	7.28264e-05	SLMS(1)S(1)PEDLTK	_SLMS(ph)S(ph)PEDLTK_	2	684.264	829
Q9R0U0	Serine/arginine-rich splicing factor 10	Srsf10	0.99997	1;2	S	0.000961008	S(1)RS(1)FDYNYR	_S(ph)RS(ph)FDYNYR_	2	684.245	133
Q9CT10	Ran-binding protein 3	Ranbp3	0.999969	1	S	3.62239e-122	SPS(1)ESAEETHTLEEK	_SPS(ph)ESAEETHTLEEK_	2	877.362	148
F6TYB7	Myelin basic protein	Mbp	0.999969	1	T	3.99061e-35	NIVTPRT(1)PPPSQGK	_NIVTPRT(ph)PPPSQGK_	2	786.401	159
S4R291	Ankyrin-2	Ank2	0.999968	1;2	S	4.23753e-27	TEGDS(1)PAAALSPQMHQEPVQQDFSGK	_TEGDS(ph)PAAALSPQMHQEPVQQDFSGK_	3	945.748	3681
Q9JI99	Sphingosine-1-phosphate phosphatase 1	Sgpp1	0.999968	1	S	5.61723e-18	RNS(1)LTGEEGELVK	_RNS(ph)LTGEEGELVK_	2	756.359	101
D3YXK0		Jakmip2	0.999966	2	S	0.0294932	LTDIQIELHQEKS(1)KVS(1)K	_LTDIQIELHQEKS(ph)KVS(ph)K_	2	1078.52	42
P14873	Microtubule-associated protein 1B	Map1b	0.999966	1;2;3;4	S	3.44569e-26	SPSLS(1)PSPPS(1)PIEK	_SPSLS(ph)PSPPS(ph)PIEK_	2	791.844	1260
A2A5Y6	Microtubule-associated protein	Mapt	0.999964	2;3	S	5.78929e-71	AKTDHGAEIVYKS(1)PVVS(1)GDT(0.681)S(0.319)PR	_AKTDHGAEIVYKS(ph)PVVS(ph)GDT(ph)SPR_	3	885.382	708
B2RQ80	Traf2 and NCK-interacting protein kinase	Tnik	0.999964	1	S	1.2262e-12	SEGS(1)PVLPHEPSK	_SEGS(ph)PVLPHEPSK_	2	722.329	769
O54774	AP-3 complex subunit delta-1	Ap3d1	0.999964	2;3	S	1.27468e-91	HSS(1)LPTES(1)DEDIAPAQR	_HSS(ph)LPTES(ph)DEDIAPAQR_	2	1006.9	755
Q64332	Synapsin-2	Syn2	0.999964	2	T	4.0848e-10	T(1)PALS(0.999)PQRPLTTQQPQSGTLKEPDSSK	_T(ph)PALS(ph)PQRPLTTQQPQSGTLKEPDSSK_	3	1018.15	422
D3YXK0		Jakmip2	0.999963	2	S	0.0294932	LTDIQIELHQEKS(1)KVS(1)K	_LTDIQIELHQEKS(ph)KVS(ph)K_	2	1078.52	45
Q6NZR5		Skiv2l	0.999963	2	S	0.00175643	GDNAS(1)PS(0.985)PS(0.014)GT(0.001)PLVR	_GDNAS(ph)PS(ph)PSGTPLVR_	2	807.832	240
Q61234	Alpha-1-syntrophin	Snta1	0.999962	1	S	2.29873e-17	NSAGGTSVGWDS(1)PPASPLQR	_NSAGGTSVGWDS(ph)PPASPLQR_	2	1032.46	183
E9PWP6		Rims1	0.999961	1;2	S	1.5951e-18	AQTTARVS(1)PPES(1)PR	_AQTTARVS(ph)PPES(ph)PR_	2	828.861	443
Q9DAZ9	Zinc finger FYVE domain-containing protein 19	Zfyve19	0.999959	1	S	1.13051e-07	VTLQDYHLPDS(1)DEDEETAIQR	_VTLQDYHLPDS(ph)DEDEETAIQR_	3	852.038	280
Q6DID3	Protein SCAF8	Scaf8	0.999959	1	S	2.60013e-07	ASEPVKEPVQTAQS(1)PAPVEK	_ASEPVKEPVQTAQS(ph)PAPVEK_	3	724.691	617
Q3U4B1		Ssbp4	0.999958	1	S	0.0146171	NS(1)PGAVGGLSNAPGTPR	_NS(ph)PGAVGGLSNAPGTPR_	2	816.38	320
Q64336	T-box brain protein 1	Tbr1	0.999958	1	S	5.10084e-06	SKLS(1)PVLDGVSELR	_SKLS(ph)PVLDGVSELR_	2	790.408	84
Q3UVL4	Protein fat-free homolog	Ffr	0.999957	1	S	2.25259e-27	AAAAAVGPGLGSGPGDS(1)PEGPEADAPER	_(ac)AAAAAVGPGLGSGPGDS(ph)PEGPEADAPER_	3	875.72	18
Q05D44	Eukaryotic translation initiation factor 5B	Eif5b	0.999957	1	S	7.91313e-12	SVPTVDS(1)GNEDDDSSFK	_SVPTVDS(ph)GNEDDDSSFK_	2	939.867	215
Q9CPS8	UPF0733 protein C2orf88 homolog		0.999957	1	S	4.22698e-26	TPS(1)PGEQQQVQEVK	_TPS(ph)PGEQQQVQEVK_	2	817.875	40
Q9Z0U1	Tight junction protein ZO-2	Tjp2	0.999957	1	S	2.04045e-05	GSYGS(1)DPEEEEYR	_GSYGS(ph)DPEEEEYR_	2	799.288	1136
Q8K3A9	7SK snRNA methylphosphate capping enzyme	Mepce	0.999957	2	T	2.84498e-06	ALNAET(1)PKS(0.182)S(0.818)PLPAK	_ALNAET(ph)PKSS(ph)PLPAK_	2	842.391	188
A2ARP8	Microtubule-associated protein 1A	Mtap1a	0.999956	1;2	S	4.30584e-14	VPSAPGQES(1)PVPDTK	_VPSAPGQES(ph)PVPDTK_	2	794.866	2027
P14873	Microtubule-associated protein 1B	Map1b	0.999956	2;3;4	S	3.73946e-13	SPSLS(1)PSPPS(1)PIEK	_SPSLS(ph)PSPPS(ph)PIEK_	2	791.844	1255
Q9CQV8	14-3-3 protein beta/alpha	Ywhab	0.999956	1	T	4.97838e-06	T(1)MDKSELVQK	_(ac)T(ph)MDKSELVQK_	2	650.796	2
Q7TPW1	Nexilin	Nexn	0.999955	1	S	2.06245e-18	EMLAS(1)DDEEESSPK	_EMLAS(ph)DDEEESSPK_	2	823.811	16
A2A5Y6	Microtubule-associated protein	Mapt	0.999955	1;2	T	2.23457e-10	TTPSPKT(1)PPGSGEPPK	_TTPSPKT(ph)PPGSGEPPK_	2	829.395	489
Q99NE5	Regulating synaptic membrane exocytosis protein 1	Rims1	0.999952	1	S	7.06074e-16	QGS(1)PTQSPPADTSFGSR	_QGS(ph)PTQSPPADTSFGSR_	2	900.383	1023
A2A5R2		Arfgef2	0.99995	2	S	1.56448e-17	ELEKPMQSKPQS(1)PVIQAT(0.001)AGS(0.999)PK	_ELEKPMQSKPQS(ph)PVIQATAGS(ph)PK_	3	871.079	218
G3X928		Sec23ip	0.999949	1	S	0.000203402	IVES(1)PELSKDEDYLGK	_IVES(ph)PELSKDEDYLGK_	2	951.443	924
B1AQX7	SRC kinase signaling inhibitor 1	Srcin1	0.999948	1	S	5.82325e-08	RGS(1)DELTVPR	_RGS(ph)DELTVPR_	2	605.285	1022
Q6PCP5	Mitochondrial fission factor	Mff	0.999948	2	S	0.0226139	NDS(0.001)IVT(0.999)PS(1)PPQAR	_NDSIVT(ph)PS(ph)PPQAR_	2	771.323	151
Q8BJU0	Small glutamine-rich tetratricopeptide repeat-containing protein alpha	Sgta	0.999947	1	T	1.2236e-21	APDRT(1)PPSEEDSAEAER	_APDRT(ph)PPSEEDSAEAER_	2	968.9	82
E9Q3M9		2010300C02Rik	0.999944	1	S	4.78043e-12	ALS(1)HDSIFFPESGQDPARPVR	_ALS(ph)HDSIFFPESGQDPARPVR_	3	802.713	92
Q8R1B4	Eukaryotic translation initiation factor 3 subunit C	Eif3c	0.999942	1	S	0.0116831	QPLLLS(1)EDEEDTKR	_QPLLLS(ph)EDEEDTKR_	3	584.94	39
E9QAU4	Sickle tail protein	Etl4	0.999941	1;2	S	2.05999e-59	GDAAGDKLELSEDS(1)PNSEQELDKIGGK	_GDAAGDKLELSEDS(ph)PNSEQELDKIGGK_	3	961.436	1086
E9QAD8	IQ motif and SEC7 domain-containing protein 2	Iqsec2	0.999941	1	S	1.00834e-12	AQNPAYFEGKPAS(1)LDEGAMAGAR	_AQNPAYFEGKPAS(ph)LDEGAMAGAR_	3	811.03	412
Q9QYB8	Beta-adducin	Add2	0.999941	1	S	5.76079e-34	SEDTVPEAAS(1)PPPSQGQHYFDR	_(ac)SEDTVPEAAS(ph)PPPSQGQHYFDR_	2	1269.03	11
Q60829	Protein phosphatase 1 regulatory subunit 1B	Ppp1r1b	0.99994	1	S	2.25353e-14	AVQHLQTISNLSENQAS(1)EEEDELGELR	_AVQHLQTISNLSENQAS(ph)EEEDELGELR_	3	1040.48	97
J3QNK8	Abl interactor 1	Abi1	0.999937	1	S	2.87674e-15	TNPPTQKPPS(1)PPVSGR	_TNPPTQKPPS(ph)PPVSGR_	2	870.427	183
Q7TQD2	Tubulin polymerization-promoting protein	Tppp	0.999934	1	S	3.24083e-27	RLS(1)LESEGANEGATAAPELSALEEAFRR	_RLS(ph)LESEGANEGATAAPELSALEEAFRR_	3	1018.82	31
E9QKC6	Tripartite motif-containing protein 2	Trim2	0.999932	2	S	0.000390402	VIRS(1)ADVS(0.569)PT(0.348)T(0.083)EGVKR	_VIRS(ph)ADVS(ph)PTTEGVKR_	2	937.942	450
Q9JIX8	Apoptotic chromatin condensation inducer in the nucleus	Acin1	0.99993	1	S	0.000257181	SLS(1)PLSGTTDTK	_SLS(ph)PLSGTTDTK_	2	643.797	479
Q8VD37	SH3-containing GRB2-like protein 3-interacting protein 1	Sgip1	0.99993	2;3	T	3.28112e-17	WVHFS(1)DAS(1)PEHVT(1)PELTPR	_WVHFS(ph)DAS(ph)PEHVT(ph)PELTPR_	3	815.662	324
A2AM05	Centlein	Cntln	0.999928	1	S	0.046862	KDLKMS(1)VLISK	_KDLKMS(ph)VLISK_	2	671.364	1219
P11499	Heat shock protein HSP 90-beta	Hsp90ab1	0.999926	1	S	1.09e-06	IEDVGS(1)DEEDDSGKDKK	_IEDVGS(ph)DEEDDSGKDKK_	2	973.399	255
E9Q0N0	Intersectin-1	Itsn1	0.999925	1	S	3.46369e-75	LPEEPSS(1)EDEQQPEK	_LPEEPSS(ph)EDEQQPEK_	2	911.375	335
P14873	Microtubule-associated protein 1B	Map1b	0.999919	1	S	7.68211e-60	DYNASASTIS(1)PPSSMEEDKFSK	_DYNASASTIS(ph)PPSSMEEDKFSK_	3	824.349	1204
P35564	Calnexin	Canx	0.999918	1	S	5.50219e-05	QKS(1)DAEEDGVTGSQDEEDSKPK	_QKS(ph)DAEEDGVTGSQDEEDSKPK_	3	820.341	553
Q6P9R2	Serine/threonine-protein kinase OSR1	Oxsr1	0.999915	1	S	3.42027e-12	LHKTEDGGWEWS(1)DDEFDEESEEGR	_LHKTEDGGWEWS(ph)DDEFDEESEEGR_	3	988.049	339
Q8VCI5	Peroxisomal biogenesis factor 19	Pex19	0.999912	1	S	2.23162e-07	AKPS(1)PEHAPTISAPDASGPQK	_AKPS(ph)PEHAPTISAPDASGPQK_	3	722.679	35
Q6PGL7	WASH complex subunit FAM21	Fam21	0.999911	1	S	3.33063e-07	VDNARVS(1)PEVGSADVASIAQK	_VDNARVS(ph)PEVGSADVASIAQK_	3	731.69	747
Q9CSN1	SNW domain-containing protein 1	Snw1	0.999909	2	S	0.0226166	GPPS(1)PPAPVMHS(0.875)PS(0.125)RK	_GPPS(ph)PPAPVMHS(ph)PSRK_	3	601.267	224
Q99JF8	PC4 and SFRS1-interacting protein	Psip1	0.999908	1	S	9.50454e-25	ETNVSKEDTDQEEKAS(1)NEDVTK	_ETNVSKEDTDQEEKAS(ph)NEDVTK_	3	859.368	129
S4R291	Ankyrin-2	Ank2	0.999905	1	S	3.23297e-18	HKLNVPETMTEVLDVS(1)DEEGDDTVTGDGGEYLRPEDLK	_HKLNVPETMTEVLDVS(ph)DEEGDDTVTGDGGEYLRPEDLK_	4	1071.49	846
Q3UPL0	Protein transport protein Sec31A	Sec31a	0.999902	1;2	S	2.08049e-05	DSDQVAQS(1)DGEES(1)PAAEEQLLGER	_DSDQVAQS(ph)DGEES(ph)PAAEEQLLGER_	3	907.358	526
Q3UPL0	Protein transport protein Sec31A	Sec31a	0.999902	2	S	2.08049e-05	DSDQVAQS(1)DGEES(1)PAAEEQLLGER	_DSDQVAQS(ph)DGEES(ph)PAAEEQLLGER_	3	907.358	531
O88543	COP9 signalosome complex subunit 3	Cops3	0.999901	1	S	6.95963e-16	SMGS(1)QEDDSGNKPSSYS	_SMGS(ph)QEDDSGNKPSSYS_	2	928.338	410
A2ARP8	Microtubule-associated protein 1A	Mtap1a	0.999899	1	S	4.4856e-07	EAELTPENIAAAREES(1)EPEVK	_EAELTPENIAAAREES(ph)EPEVK_	3	798.035	882
Q91YM2	Rho GTPase-activating protein 35	Arhgap35	0.999898	1	S	7.13121e-14	TSFSVGS(1)DDELGPIR	_TSFSVGS(ph)DDELGPIR_	2	830.367	1179
Q3V3V9	Leucine-rich repeat-containing protein 16C	Rltpr	0.999893	1	S	0.000149809	KAGS(1)DGDIMDSSTETPPISIK	_KAGS(ph)DGDIMDSSTETPPISIK_	3	743.671	1134
Q9WTS4	Teneurin-1	Odz1	0.99989	2	S	6.67281e-10	HGYQLEMGS(0.996)DVDT(0.004)ETEGAAS(1)PDHALR	_HGYQLEMGS(ph)DVDTETEGAAS(ph)PDHALR_	3	982.726	116
F8VQN6	Rho guanine nucleotide exchange factor 12	Arhgef12	0.999888	1	S	1.34747e-33	TDWSSGDASRPSSDSADS(1)PK	_TDWSSGDASRPSSDSADS(ph)PK_	2	1066.92	309
A2A5Y6	Microtubule-associated protein	Mapt	0.999885	2	S	3.99332e-14	SGYS(0.982)S(0.018)PGS(1)PGTPGSR	_SGYS(ph)SPGS(ph)PGTPGSR_	2	777.287	510
H3BJD6		Ppp1r9a	0.999884	1	S	0.000439773	RPS(1)PGEVSKGDTMENVEVK	_RPS(ph)PGEVSKGDTMENVEVK_	3	713.664	841
Q3UM45	Protein phosphatase 1 regulatory subunit 7	Ppp1r7	0.999882	2	S	0.00226897	VES(1)EES(0.999)GDEEGKKHGGGGIVANLS(0.001)EQSLK	_VES(ph)EES(ph)GDEEGKKHGGGGIVANLSEQSLK_	3	1044.13	24
Q8BNW9	Kelch repeat and BTB domain-containing protein 11	Kbtbd11	0.999877	1	S	1.73832e-27	ASAAEGSEAS(1)PPSLR	_ASAAEGSEAS(ph)PPSLR_	2	755.333	70
E9QN63	Arf-GAP with SH3 domain, ANK repeat and PH domain-containing protein 1	Asap1	0.999876	1	S	1.18684e-10	TLS(1)DPPSPLPHGPPNK	_TLS(ph)DPPSPLPHGPPNK_	2	867.417	854
P27546	Microtubule-associated protein 4	Map4	0.999876	1;2	S	6.15956e-19	AAVGVTGNDIT(0.134)T(0.866)PPNKEPPPS(1)PEKK	_AAVGVTGNDITT(ph)PPNKEPPPS(ph)PEKK_	3	902.093	667
Q3TIR3	Synembryn-A	Ric8a	0.999875	1;2	S	4.19626e-18	GLMAGGRPEGQYS(1)EDEDTDTEEYR	_GLMAGGRPEGQYS(ph)EDEDTDTEEYR_	3	929.036	435
O70166	Stathmin-3	Stmn3	0.999874	1	S	0.00362568	AS(1)GQSFEVILK	_AS(ph)GQSFEVILK_	2	629.808	50
F8SLQ3	PEX5-related protein	Pex5l	0.999872	1	S	1.01093e-06	MSKS(1)PVDSSVLEGVK	_MSKS(ph)PVDSSVLEGVK_	2	821.892	436
P56695	Wolframin	Wfs1	0.99987	1	S	2.40967e-28	LNATAS(1)LEQDKIEPPR	_LNATAS(ph)LEQDKIEPPR_	2	931.456	32
P63011	Ras-related protein Rab-3A	Rab3a	0.999868	1	S	2.6864e-06	MSES(1)LDTADPAVTGAK	_M(ox)SES(ph)LDTADPAVTGAK_	2	844.858	190
Q9QYX7	Protein piccolo	Pclo	0.999867	3	T	1.18216e-17	ERPKT(1)PPS(0.169)NLS(0.831)PIEDAS(0.986)PT(0.014)EELR	_ERPKT(ph)PPSNLS(ph)PIEDAS(ph)PTEELR_	3	935.071	1760
P54285	Voltage-dependent L-type calcium channel subunit beta-3	Cacnb3	0.999865	1	S	0.000844358	DSLMPS(1)DEASESSR	_DSLMPS(ph)DEASESSR_	2	795.803	403
P35436	Glutamate [NMDA] receptor subunit epsilon-1	Grin2a	0.999864	1	S	0.00330827	KMPS(1)IESDV	_KMPS(ph)IESDV_	2	543.233	1459
P06837	Neuromodulin	Gap43	0.999863	1;2	S	2.7961e-34	ATTDNS(1)PS(0.5)S(0.5)KAEDGPAKEEPK	_ATTDNS(ph)PS(ph)SKAEDGPAKEEPK_	3	773.652	142
Q3UJU9	Regulator of microtubule dynamics protein 3	Fam82a2	0.999862	1	S	9.31526e-39	SHS(1)LPNSLDYAQASER	_SHS(ph)LPNSLDYAQASER_	2	927.905	46
Q8BTG7	Protein NDRG4	Ndrg4	0.999862	1	S	0.017412	RLS(1)GGAVPSASMTR	_RLS(ph)GGAVPSASMTR_	2	735.35	298
Q8R574	Phosphoribosyl pyrophosphate synthase-associated protein 2	Prpsap2	0.999843	1	S	3.37783e-28	LGIAVIHGEAQDAESDLVDGRHS(1)PPMVR	_LGIAVIHGEAQDAESDLVDGRHS(ph)PPMVR_	4	763.119	227
Q8R361	Rab11 family-interacting protein 5	Rab11fip5	0.999842	1	S	0.000182985	TYS(1)DEASQLR	_TYS(ph)DEASQLR_	2	625.258	307
Q68FF6	ARF GTPase-activating protein GIT1	Git1	0.999838	2	S	1.54409e-24	SQSELDDQHDYDS(1)VAS(0.994)DEDT(0.006)DQEPLPSAGATR	_SQSELDDQHDYDS(ph)VAS(ph)DEDTDQEPLPSAGATR_	3	1213.47	394
Q58A65	C-Jun-amino-terminal kinase-interacting protein 4	Spag9	0.999834	1;2	S	4.54774e-47	SASQSS(1)LDKLDQELK	_SASQSS(ph)LDKLDQELK_	2	864.906	733
Q9ESX5	H/ACA ribonucleoprotein complex subunit 4	Dkc1	0.999834	3	S	0.0100397	KRDS(1)ES(0.999)ES(0.998)DET(0.003)PTVPQLK	_KRDS(ph)ES(ph)ES(ph)DETPTVPQLK_	3	762.637	451
Q9WV92	Band 4.1-like protein 3	Epb41l3	0.999832	1	S	0.0476415	QLEYQQFEDDKLS(1)QR	_QLEYQQFEDDKLS(ph)QR_	3	669.633	96
Q5U3K5	Rab-like protein 1	Parf	0.999826	1	S	1.27034e-12	FPVREDLS(1)DVTDEDTGPAQPPPPSK	_FPVREDLS(ph)DVTDEDTGPAQPPPPSK_	3	925.423	594
Q9R0L6	Pericentriolar material 1 protein	Pcm1	0.999818	1	S	1.34932e-09	VTNAIS(1)PESSPGVGR	_VTNAIS(ph)PESSPGVGR_	2	775.864	65
P26883	Peptidyl-prolyl cis-trans isomerase FKBP1A	Fkbp1a	0.999812	1	S	5.50171e-06	GVQVETIS(1)PGDGR	_GVQVETIS(ph)PGDGR_	2	697.819	9
F7BNZ5	Breast carcinoma-amplified sequence 1 homolog	Bcas1	0.999808	1	S	0.00352784	RMS(1)DAQVQTDPVSIGPVGK	_RMS(ph)DAQVQTDPVSIGPVGK_	3	688.998	361
Q61937	Nucleophosmin	Npm1	0.999807	2	S	0.0001775	LKCGS(0.017)GPVHIS(0.983)GQHLVAVEEDAES(1)EDEDEEDVK	_LKCGSGPVHIS(ph)GQHLVAVEEDAES(ph)EDEDEEDVK_	3	1237.52	125
Q811P8	Rho GTPase-activating protein 32	Arhgap32	0.999805	1	S	3.16689e-42	SAKS(1)EESLTSLHAVDGDSK	_SAKS(ph)EESLTSLHAVDGDSK_	2	1020.96	706
B1AQX7	SRC kinase signaling inhibitor 1	Srcin1	0.999793	2	S	5.08159e-05	LSYAGGRPPS(0.999)Y(0.001)AGS(1)PVHHAAER	_LSYAGGRPPS(ph)YAGS(ph)PVHHAAER_	3	814.025	378
Q6I6G8	E3 ubiquitin-protein ligase HECW2	Hecw2	0.99979	1	S	2.65729e-08	ANS(1)DTDLVTSESR	_ANS(ph)DTDLVTSESR_	2	737.807	48
O88737	Protein bassoon	Bsn	0.999788	1;2;4	S	1.25926e-70	SKTPPSNLS(1)PIEDAS(1)PTEELR	_SKTPPSNLS(ph)PIEDAS(ph)PTEELR_	2	1214.54	1114
Q8BGU5	Cyclin-Y	Ccny	0.999788	1	S	1.08655e-28	SAS(1)ADNLILPR	_SAS(ph)ADNLILPR_	2	618.803	326
F6X0J3		Fam149a	0.999788	3	T	0.00573817	T(1)LRGFS(0.945)AS(0.056)GARGS(0.999)GLGGR	_T(ph)LRGFS(ph)ASGARGS(ph)GLGGR_	2	973.905	89
Q9JL26	Formin-like protein 1	Fmnl1	0.999787	1	S	1.39711e-11	EAAADTSGREEPPTPKS(1)PPK	_EAAADTSGREEPPTPKS(ph)PPK_	3	715.667	1021
Q9Z2U1	Proteasome subunit alpha type-5	Psma5	0.999787	1	S	3.30879e-05	ITS(1)PLMEPSSIEK	_ITS(ph)PLMEPSSIEK_	2	756.357	56
S4R291	Ankyrin-2	Ank2	0.999784	1;2	S	0.00261252	SDS(1)NASFLR	_SDS(ph)NASFLR_	2	538.724	31
Q6AXD2	Abl interactor 2	Abi2	0.999782	1	S	9.22054e-12	TTPPTQKPPS(1)PPMSGK	_TTPPTQKPPS(ph)PPMSGK_	2	865.913	183
Q52KI8	Serine/arginine repetitive matrix protein 1	Srrm1	0.999779	1	S	0.0165654	RYS(1)PPIQR	_RYS(ph)PPIQR_	2	548.769	616
A2ARS0	Ankyrin repeat domain-containing protein 63	Ankrd63	0.999779	1;2	S	2.12636e-60	GSNSDS(1)PPGHPAPAPS(1)PERR	_GSNSDS(ph)PPGHPAPAPS(ph)PERR_	3	724.967	193
F8WHU5	Sister chromatid cohesion protein PDS5 homolog B	Pds5b	0.999777	1	S	6.05143e-17	AES(1)PETSAVESTQSTPQK	_AES(ph)PETSAVESTQSTPQK_	2	978.925	1359
Q9Z2H5	Band 4.1-like protein 1	Epb41l1	0.999777	1;2	S	1.09018e-18	SLPELDRDKS(1)DS(0.978)ET(0.022)EGLVFAQDLK	_SLPELDRDKS(ph)DS(ph)ETEGLVFAQDLK_	3	951.426	648
P16014	Secretogranin-1	Chgb	0.999775	1	S	5.35509e-18	ADEFPDFYDS(1)EEQMGPHQEANDEK	_ADEFPDFYDS(ph)EEQMGPHQEANDEK_	3	970.036	626
E9Q3M9		2010300C02Rik	0.999773	1	S	1.06123e-11	S(1)PPEMSLLHDVGPGTTIK	_S(ph)PPEMSLLHDVGPGTTIK_	2	979.968	162
Q8BPN8	DmX-like protein 2	Dmxl2	0.999765	1	S	3.25539e-25	RQS(1)ESIAAPPVASEDMDK	_RQS(ph)ESIAAPPVASEDMDK_	2	1005.95	2394
Q9WUD1	STIP1 homology and U box-containing protein 1	Stub1	0.999758	2	S	5.55051e-18	LGT(0.624)GGGGS(0.376)PDKS(1)PSAQELK	_LGT(ph)GGGGSPDKS(ph)PSAQELK_	2	973.419	24
Q8JZW4	Copine-5	Cpne5	0.999751	2;3;4	S	4.961e-07	PRPPPAAPAQS(1)PPQS(1)PAHS(1)PPGS(0.999)PVHT(0.002)HI	_PRPPPAAPAQS(ph)PPQS(ph)PAHS(ph)PPGS(ph)PVHTHI_	3	1078.12	583
Q4KMM3	Oxidation resistance protein 1	Oxr1	0.99975	1	S	6.94586e-07	RDS(1)ETEVEELR	_RDS(ph)ETEVEELR_	2	721.812	488
O55143	Sarcoplasmic/endoplasmic reticulum calcium ATPase 2	Atp2a2	0.999745	1	S	9.77131e-11	EFDELSPS(1)AQR	_EFDELSPS(ph)AQR_	2	679.785	663
A2ARP8	Microtubule-associated protein 1A	Mtap1a	0.999741	1	S	7.31742e-12	QLS(1)PESLGTLQFGELSLGKEEK	_QLS(ph)PESLGTLQFGELSLGKEEK_	3	824.075	1443
Q9Z0U1	Tight junction protein ZO-2	Tjp2	0.999741	1	S	1.80081e-07	KVQVAPLQGS(1)PPLSHDDR	_KVQVAPLQGS(ph)PPLSHDDR_	3	675.337	107
Q5SRX1	TOM1-like protein 2	Tom1l2	0.99974	1	S	3.78076e-18	AAETVPDLPS(1)PPTEAPAPASNTSTR	_AAETVPDLPS(ph)PPTEAPAPASNTSTR_	2	1279.09	479
Q8R146	Acylamino-acid-releasing enzyme	Apeh	0.999737	1	S	9.37542e-20	ALDVSAS(1)DEEMARPK	_ALDVSAS(ph)DEEMARPK_	2	849.874	187
E9Q3M9		2010300C02Rik	0.999736	1	S	2.58366e-05	DMS(1)PSEGDVAPPK	_DMS(ph)PSEGDVAPPK_	2	705.286	570
Q569Z6	Thyroid hormone receptor-associated protein 3	Thrap3	0.999735	2	S	1.85673e-06	ERS(1)PALKS(1)PLQSVVVR	_ERS(ph)PALKS(ph)PLQSVVVR_	3	642.659	253
A2A5Y6	Microtubule-associated protein	Mapt	0.999734	1;2	T	0.0251126	VAVVRT(1)PPKS(0.944)PS(0.051)AS(0.005)K	_VAVVRT(ph)PPKS(ph)PSASK_	3	561.946	539
D3Z4T9	Zinc finger Ran-binding domain-containing protein 2	Zranb2	0.999733	1	S	1.92569e-27	YKLDEDEDEDDADLSKYNLDAS(1)EEEDSNK	_YKLDEDEDEDDADLSKYNLDAS(ph)EEEDSNK_	3	1158.8	198
P70174	Histamine H1 receptor	Hrh1	0.99973	1	S	1.31872e-05	RIS(1)ETSEDQTLVDR	_RIS(ph)ETSEDQTLVDR_	2	864.894	344
Q7TSC1	Protein PRRC2A	Prrc2a	0.999725	1	S	3.11818e-17	S(1)EGSEYEEIPKR	_S(ph)EGSEYEEIPKR_	2	752.322	1087
H7BX08	Calmodulin-regulated spectrin-associated protein 2	Camsap2	0.999725	1	S	1.03338e-05	SVS(1)NEGLTLNNSR	_SVS(ph)NEGLTLNNSR_	2	735.833	456
E9Q3M9		2010300C02Rik	0.999711	1	S	1.24909e-11	DLS(1)PSEGDVAPPK	_DLS(ph)PSEGDVAPPK_	2	696.308	612
Q9JJV4	Voltage-dependent calcium channel gamma-4 subunit	Cacng4	0.999704	2	S	8.0947e-07	S(0.015)T(0.015)EAS(0.97)PS(0.001)RDAS(1)PVGLK	_STEAS(ph)PSRDAS(ph)PVGLK_	2	881.376	259
Q2PFD7	PH and SEC7 domain-containing protein 3	Psd3	0.999701	2;3	S	1.6167e-91	SHS(1)S(1)PSLNPDAS(1)PVTAK	_SHS(ph)S(ph)PSLNPDAS(ph)PVTAK_	2	967.87	1001
E9QK41	Actin-binding LIM protein 1	Ablim1	0.99968	1	S	7.43436e-10	TLS(1)PTPSAEGYQDVR	_TLS(ph)PTPSAEGYQDVR_	2	850.88	475
Q8BJF9	Charged multivesicular body protein 2b	Chmp2b	0.999677	1	S	0.00130167	ATIS(1)DEEIER	_ATIS(ph)DEEIER_	2	621.766	199
Q9WV92	Band 4.1-like protein 3	Epb41l3	0.999677	1;2	S	3.09186e-46	TDTAADGET(0.002)S(0.998)ATES(1)DQEEDAEIK	_TDTAADGETS(ph)ATES(ph)DQEEDAEIK_	2	1286.97	547
A2AFQ0	E3 ubiquitin-protein ligase HUWE1	Huwe1	0.999676	1	S	6.17418e-35	GSGTAS(1)DDEFENLR	_GSGTAS(ph)DDEFENLR_	2	789.309	1907
B2RRE2	Unconventional myosin-XVIIIa	Myo18a	0.999676	2	S	3.70927e-07	S(0.251)S(0.277)S(0.305)PT(0.08)S(0.088)HWKPLAPDPS(1)DDEHDPVDSISRPR	_SSS(ph)PTSHWKPLAPDPS(ph)DDEHDPVDSISRPR_	3	1158.17	2013
J3QNT7	Epsin-2	Epn2	0.999658	1	S	2.49915e-18	TTS(1)PDLFESQSLTSASSKPSSAR	_TTS(ph)PDLFESQSLTSASSKPSSAR_	3	822.046	488
G3X9J1	Sodium/calcium exchanger 1	Slc8a1	0.999656	1	S	3.26264e-25	GMIIEHEGDRPAS(1)KTEIEMDGK	_GMIIEHEGDRPAS(ph)KTEIEMDGK_	3	841.713	282
P14873	Microtubule-associated protein 1B	Map1b	0.999655	1	S	1.95799e-13	LGGDVS(1)PTQIDVSQFGSFK	_LGGDVS(ph)PTQIDVSQFGSFK_	2	1031.48	1497
Q8BMI3	ADP-ribosylation factor-binding protein GGA3	Gga3	0.999654	1	S	0.0351436	TLIPS(1)PPPRPK	_TLIPS(ph)PPPRPK_	2	641.85	159
Q3B7Z2	Oxysterol-binding protein 1	Osbp	0.999649	2	S	3.45857e-10	MLAES(1)DDS(1)GDEESVSQTDKTELQSTLR	_MLAES(ph)DDS(ph)GDEESVSQTDKTELQSTLR_	3	1044.43	191
O70251	Elongation factor 1-beta	Eef1b	0.999645	1	S	2.41804e-35	YGPSSVEDTTGSGAADAKDDDDIDLFGS(1)DDEEESEEAK	_YGPSSVEDTTGSGAADAKDDDDIDLFGS(ph)DDEEESEEAK_	3	1349.53	106
F8VPU2		Farp1	0.999645	1	S	2.00875e-43	SPDEATAADQES(1)EDDLSASR	_SPDEATAADQES(ph)EDDLSASR_	2	1087.42	892
Q3UJU9	Regulator of microtubule dynamics protein 3	Fam82a2	0.999643	1	S	4.10233e-10	KDS(1)LDLDVEAASSPAAAALEEDDSSGR	_KDS(ph)LDLDVEAASSPAAAALEEDDSSGR_	3	933.745	212
D3YUV1	Nuclear receptor-binding protein	Nrbp1	0.999641	1	S	1.06178e-09	S(1)EGESQTVVSSGSDPK	_(ac)S(ph)EGESQTVVSSGSDPK_	2	858.354	2
P19246	Neurofilament heavy polypeptide	Nefh	0.999638	2;3	S	1.70071e-32	S(1)PAEAKS(1)PAEPKS(1)PATVK	_S(ph)PAEAKS(ph)PAEPKS(ph)PATVK_	2	1017.93	583
P80560	Receptor-type tyrosine-protein phosphatase N2	Ptprn2	0.999638	2	S	1.35409e-11	SEQPEEVLS(1)S(0.998)EEET(0.002)AGVEHVR	_SEQPEEVLS(ph)S(ph)EEETAGVEHVR_	2	1251.01	422
Q80X80	C2 domain-containing protein 2-like	C2cd2l	0.999638	1;2	S	3.85212e-48	LDS(1)PS(0.007)RS(0.839)PS(0.153)KVEVT(0.001)EK	_LDS(ph)PSRS(ph)PSKVEVTEK_	2	959.932	464
Q8VD37	SH3-containing GRB2-like protein 3-interacting protein 1	Sgip1	0.999633	3	T	0.00887143	WVHFS(0.186)DAS(0.82)PEHVT(0.994)PELT(1)PR	_WVHFSDAS(ph)PEHVT(ph)PELT(ph)PR_	3	815.662	328
F6SEU4	Ras GTPase-activating protein SynGAP	Syngap1	0.999628	1	S	0.0268984	TVS(1)VPVEGR	_TVS(ph)VPVEGR_	2	512.247	87
Q9Z2H5	Band 4.1-like protein 1	Epb41l1	0.999627	2	T	9.7517e-05	RLPSS(0.001)PAS(0.019)PS(0.98)PKGT(1)PEK	_RLPSSPASPS(ph)PKGT(ph)PEK_	3	632.627	550
O35954	Membrane-associated phosphatidylinositol transfer protein 1	Pitpnm1	0.999611	1	S	0.000600103	RGS(1)MNNEMLSPEVGPVRDPLADGVEVLGR	_RGS(ph)MNNEMLSPEVGPVRDPLADGVEVLGR_	3	1058.84	593
B8QI35	Liprin-alpha-3	Ppfia3	0.999608	1	S	0.0295281	S(1)LPGSALELR	_S(ph)LPGSALELR_	2	561.781	508
Q924N4	Solute carrier family 12 member 6	Slc12a6	0.999607	2	S	3.23286e-07	LT(0.124)S(0.877)IGS(1)DEDEETETYQEK	_LTS(ph)IGS(ph)DEDEETETYQEK_	2	1117.42	1032
A2ASS6	Titin	Ttn	0.999587	1	S	0.0434647	VTNDNLLS(1)RK	_VTNDNLLS(ph)RK_	2	620.308	18562
P46097	Synaptotagmin-2	Syt2	0.999585	1	T	1.48141e-47	GGQDDDDAETGLT(1)EGEGEGEEEKEPENLGK	_GGQDDDDAETGLT(ph)EGEGEGEEEKEPENLGK_	3	1072.1	128
Q9DCS2	UPF0585 protein C16orf13 homolog	0610011F06Rik	0.999583	1	S	0.0122696	IS(1)PQSNVDFDLTLR	_IS(ph)PQSNVDFDLTLR_	2	842.901	149
H7BX08	Calmodulin-regulated spectrin-associated protein 2	Camsap2	0.999582	1	S	3.02741e-12	LNQSS(1)PDNLTDTK	_LNQSS(ph)PDNLTDTK_	2	756.833	590
P27546	Microtubule-associated protein 4	Map4	0.99958	1	S	2.44286e-05	DMS(1)PSAETEAPLAK	_DMS(ph)PSAETEAPLAK_	2	763.826	517
E9Q6C7	Latrophilin-2	Lphn2	0.999571	1	S	0.0174514	GNS(1)DGYIIPINK	_GNS(ph)DGYIIPINK_	2	685.821	1458
Q9WV69	Dematin	Epb49	0.999564	1	S	0.00170938	HLS(1)AEDFSR	_HLS(ph)AEDFSR_	2	571.237	372
Q5U3K5	Rab-like protein 1	Parf	0.999554	2	S	3.23675e-32	NISLS(1)S(1)EEEAEGLAGHPR	_NISLS(ph)S(ph)EEEAEGLAGHPR_	2	1028.42	482
Q07113	Cation-independent mannose-6-phosphate receptor	Igf2r	0.999547	1	S	2.56094e-06	LVSFHDDS(1)DEDLLHI	_LVSFHDDS(ph)DEDLLHI_	2	917.898	2476
B2RUJ5	Amyloid beta A4 precursor protein-binding family A member 1	Apba1	0.999545	2;3	S	1.62331e-19	LHHYDERS(1)DGES(1)DS(1)PEKEAEFAPYPR	_LHHYDERS(ph)DGES(ph)DS(ph)PEKEAEFAPYPR_	3	1101.09	246
Q8BTI8	Serine/arginine repetitive matrix protein 2	Srrm2	0.999538	2	S	0.000950615	SLS(1)YS(1)PVER	_SLS(ph)YS(ph)PVER_	2	599.233	2646
Q9QYC0	Alpha-adducin	Add1	0.999521	1;2;3	T	6.00095e-28	EKSPPDQSAVPNT(1)PPS(0.544)T(0.456)PVKLEEDLPQEPTSR	_EKSPPDQSAVPNT(ph)PPS(ph)TPVKLEEDLPQEPTSR_	4	908.421	610
G5E884		Pak1	0.999509	1;2	S	6.72941e-12	TVSETPAVPPVS(1)EDEDDDDDATPPPVIAPRPEHTK	_TVSETPAVPPVS(ph)EDEDDDDDATPPPVIAPRPEHTK_	4	951.685	174
F6WMJ3	Rho guanine nucleotide exchange factor 6	Arhgef6	0.999488	1	S	5.44999e-06	EIKPS(0.001)ERPLS(0.999)PK	_EIKPSERPLS(ph)PK_	2	730.879	248
E9Q3M9		2010300C02Rik	0.999485	1	S	0.00111847	DMS(0.999)PS(0.001)KDNMAPPK	_DMS(ph)PSKDNMAPPK_	2	749.309	465
P20357	Microtubule-associated protein 2	Map2	0.999473	2	S	0.00189277	GSAQES(0.999)LDT(0.017)IS(0.983)PK	_GSAQES(ph)LDTIS(ph)PK_	2	746.802	603
Q8R1F6	Protein hid-1 homolog		0.99946	1	S	3.91332e-35	T(0.001)GS(0.999)QEGTSMEGSRPAAPAEPGTLK	_TGS(ph)QEGTSMEGSRPAAPAEPGTLK_	3	813.7	593
Q60875	Rho guanine nucleotide exchange factor 2	Arhgef2	0.999447	1;2	S	1.49628e-33	LQDS(0.001)S(0.999)DPDTGSEEEVSSR	_LQDSS(ph)DPDTGSEEEVSSR_	2	1009.4	940
Q60932	Voltage-dependent anion-selective channel protein 1	Vdac1	0.999427	1	S	2.17277e-19	LTFDSSFS(0.999)PNT(0.001)GKK	_LTFDSSFS(ph)PNTGKK_	2	804.869	117
Q3UKW2	Calmodulin	Calm1	0.999406	1	S	2.488e-06	KMKDT(0.001)DS(0.999)EEEIR	_KMKDTDS(ph)EEEIR_	3	520.892	130
Q9Z1X2	Phosphatidylserine synthase 2	Ptdss2	0.999403	1	S	1.8492e-08	VAGGSGS(0.001)ES(0.999)PLLK	_VAGGSGSES(ph)PLLK_	2	641.308	16
P63216	Guanine nucleotide-binding protein G(I)/G(S)/G(O) subunit gamma-3	Gng3	0.999395	1	S	1.07885e-19	GETPVNSTMS(0.999)IGQAR	_GETPVNSTMS(ph)IGQAR_	2	814.361	12
Q2TBE6	Phosphatidylinositol 4-kinase type 2-alpha	Pi4k2a	0.999391	2	S	1.37985e-07	MDET(0.001)S(0.999)PLVS(1)PER	_(ac)MDETS(ph)PLVS(ph)PER_	2	781.796	5
Q6PCP5	Mitochondrial fission factor	Mff	0.999348	2	T	0.0226139	NDS(0.001)IVT(0.999)PS(1)PPQAR	_NDSIVT(ph)PS(ph)PPQAR_	2	771.323	149
Q9EPR4	Solute carrier family 23 member 2	Slc23a2	0.999346	1;2	S	4.50267e-16	SSLAET(0.001)LDS(0.795)T(0.205)GS(0.999)LDPQR	_SSLAETLDS(ph)TGS(ph)LDPQR_	2	968.9	81
Q6PFD9		Nup98	0.999342	1	S	0.0139323	Y(0.001)GLQDS(0.999)DEEEEEHPPK	_YGLQDS(ph)DEEEEEHPPK_	3	661.261	888
Q8BTI8	Serine/arginine repetitive matrix protein 2	Srrm2	0.999326	1	S	0.000156642	PSMS(0.999)PTPLDR	_PSMS(ph)PTPLDR_	2	590.757	2075
S4R2L4			0.999315	1	S	0.00327418	KKEQSDIS(0.001)IS(0.999)PR	_KKEQSDISIS(ph)PR_	3	489.912	32
Q99NE5	Regulating synaptic membrane exocytosis protein 1	Rims1	0.999309	2	S	9.37001e-05	MERPS(0.005)IS(0.012)VIS(0.949)PT(0.036)S(0.999)PGALK	_MERPSISVIS(ph)PTS(ph)PGALK_	2	1015.48	566
P20357	Microtubule-associated protein 2	Map2	0.999306	1;2	S	2.26344e-91	KET(1)S(0.999)PET(0.001)SLIQDEVALK	_KET(ph)S(ph)PETSLIQDEVALK_	2	1024.47	1161
B7ZNX6	Protein LAP2	Erbb2ip	0.999297	2	S	7.11915e-05	HIVNHDDVFEES(0.001)EELS(0.999)S(0.999)DEEMK	_HIVNHDDVFEESEELS(ph)S(ph)DEEMK_	3	926.689	599
B7ZNX6	Protein LAP2	Erbb2ip	0.999297	2	S	7.11915e-05	HIVNHDDVFEES(0.001)EELS(0.999)S(0.999)DEEMK	_HIVNHDDVFEESEELS(ph)S(ph)DEEMK_	3	926.689	600
Q91XV3	Brain acid soluble protein 1	Basp1	0.999282	1;2	S	3.09443e-119	AGEASAES(0.999)T(0.001)GAADGAAPEEGEAK	_AGEASAES(ph)TGAADGAAPEEGEAK_	2	1078.44	131
A2AH25	Rho GTPase-activating protein 1	Arhgap1	0.99928	2;3	S	1.73355e-21	SDDS(0.998)KS(0.029)S(0.973)S(0.999)PEPVTHLK	_SDDS(ph)KSS(ph)S(ph)PEPVTHLK_	2	977.368	91
Q3TWW8		Srsf6	0.99925	1	S	6.30103e-07	S(0.001)HS(0.999)PLPAPPSK	_SHS(ph)PLPAPPSK_	2	599.287	303
D3Z3B8		Dlg1	0.999221	1	S	3.03505e-47	KGS(0.999)S(0.001)DELQAEPEPSR	_KGS(ph)SDELQAEPEPSR_	2	855.373	40
Q3USH5	Splicing factor, suppressor of white-apricot homolog	Sfswap	0.999217	1	S	1.64227e-05	VKLDDDS(0.999)EEDEES(0.001)R	_VKLDDDS(ph)EEDEESR_	2	873.341	601
Q3UH99	Protein shisa-6 homolog	Shisa6	0.999213	1	S	1.82424e-38	ETISAIDT(0.001)S(0.999)PKENTPVR	_ETISAIDTS(ph)PKENTPVR_	2	969.464	247
A0A087WS83	Voltage-dependent R-type calcium channel subunit alpha-1E	Cacna1e	0.999199	1;2	S	1.43149e-12	FGEAVVVGRPGS(0.999)GDGDS(0.001)DQSR	_FGEAVVVGRPGS(ph)GDGDSDQSR_	3	724.65	15
Q9D6W8	Uncharacterized protein C17orf59 homolog		0.999195	1	S	2.67205e-10	T(0.001)LS(0.999)GEEEAESVGVSSR	_TLS(ph)GEEEAESVGVSSR_	2	858.87	43
E9QM38	Solute carrier family 12 member 2	Slc12a2	0.999191	1	S	1.17936e-58	EGLDISHLQGQEELLSSQEKS(0.999)PGT(0.001)K	_EGLDISHLQGQEELLSSQEKS(ph)PGTK_	3	930.778	938
F6X0J3		Fam149a	0.999184	3	S	0.00573817	T(1)LRGFS(0.945)AS(0.056)GARGS(0.999)GLGGR	_T(ph)LRGFS(ph)ASGARGS(ph)GLGGR_	2	973.905	101
Q9ES00	Ubiquitin conjugation factor E4 B	Ube4b	0.999171	1	S	4.40155e-35	NNESQWKDS(0.999)PLAT(0.001)R	_NNESQWKDS(ph)PLATR_	2	863.383	674
Q68FF6	ARF GTPase-activating protein GIT1	Git1	0.999166	1;2	S	7.50891e-31	SQSELDDQHDYDSVAS(0.999)DEDT(0.001)DQEPLPSAGATR	_SQSELDDQHDYDSVAS(ph)DEDTDQEPLPSAGATR_	3	1186.81	397
P26339	Chromogranin-A	Chga	0.999153	2	S	0.00592243	GWRPS(0.723)S(0.278)REDS(0.999)VEAR	_GWRPS(ph)SREDS(ph)VEAR_	2	896.364	414
P97825	Hematological and neurological expressed 1 protein	Hn1	0.99914	1	S	3.44931e-27	S(0.001)NS(0.999)SEASSGDFLDLK	_SNS(ph)SEASSGDFLDLK_	2	818.841	87
Q60902	Epidermal growth factor receptor substrate 15-like 1	Eps15l1	0.999139	1;2	S	1.5558e-11	STPSHGSVSSLNS(0.001)T(0.007)GS(0.993)LS(0.999)PK	_STPSHGSVSSLNSTGS(ph)LS(ph)PK_	3	697.299	255
P14873	Microtubule-associated protein 1B	Map1b	0.999134	2;3	S	3.47993e-07	KIAELEEERS(0.999)QGS(0.974)T(0.019)S(0.009)NS(0.999)DWMK	_KIAELEEERS(ph)QGS(ph)TSNS(ph)DWMK_	3	889.015	343
A2A5R2		Arfgef2	0.999116	1;2	S	2.72563e-25	ELEKPMQSKPQS(1)PVIQAT(0.001)AGS(0.999)PK	_ELEKPMQSKPQS(ph)PVIQATAGS(ph)PK_	3	871.079	227
P14873	Microtubule-associated protein 1B	Map1b	0.999113	2	S	7.53374e-23	ES(0.067)S(0.933)PLYS(0.999)PGFS(0.001)DSTSAAK	_ESS(ph)PLYS(ph)PGFSDSTSAAK_	2	995.89	1793
P20357	Microtubule-associated protein 2	Map2	0.999113	1	S	1.94298e-11	VKDEFTAEKEAS(0.999)PPT(0.001)SADK	_VKDEFTAEKEAS(ph)PPTSADK_	3	710.659	938
P20357	Microtubule-associated protein 2	Map2	0.999102	1;2	S	3.9425e-18	GSAQESLDT(0.001)IS(0.999)PK	_GSAQESLDTIS(ph)PK_	2	706.819	608
Q3UM45	Protein phosphatase 1 regulatory subunit 7	Ppp1r7	0.99906	2	S	0.00226897	VES(1)EES(0.999)GDEEGKKHGGGGIVANLS(0.001)EQSLK	_VES(ph)EES(ph)GDEEGKKHGGGGIVANLSEQSLK_	3	1044.13	27
O70166	Stathmin-3	Stmn3	0.999053	1;4	S	1.89184e-10	ASGQSFEVILKS(0.494)PS(0.602)DLS(0.904)PES(0.999)PVLS(0.589)S(0.412)PPK	_ASGQSFEVILKSPS(ph)DLS(ph)PES(ph)PVLS(ph)SPPK_	3	1068.46	68
P14873	Microtubule-associated protein 1B	Map1b	0.99905	1;2	S	4.8692e-53	AS(0.001)LS(0.999)PMDEPVPDS(0.004)ES(0.996)PVEK	_ASLS(ph)PMDEPVPDSES(ph)PVEK_	2	1087.44	1373
P14873	Microtubule-associated protein 1B	Map1b	0.999049	1;2;3	S	3.24803e-17	KIAELEEERS(0.999)QGS(0.974)T(0.019)S(0.009)NS(0.999)DWMK	_KIAELEEERS(ph)QGS(ph)TSNS(ph)DWMK_	3	889.015	336
B1AQX7	SRC kinase signaling inhibitor 1	Srcin1	0.999005	2	S	5.08159e-05	LSYAGGRPPS(0.999)Y(0.001)AGS(1)PVHHAAER	_LSYAGGRPPS(ph)YAGS(ph)PVHHAAER_	3	814.025	374
O88737	Protein bassoon	Bsn	0.999003	4	S	3.18895e-05	S(0.999)KT(0.997)PPS(0.7)NLS(0.305)PIEDAS(0.964)PT(0.036)EELR	_S(ph)KT(ph)PPS(ph)NLSPIEDAS(ph)PTEELR_	3	863.338	1100
E9PUI5	Formin-binding protein 1-like	Fnbp1l	0.998988	1	S	0.00258758	TIS(0.999)DGT(0.001)ISAAK	_TIS(ph)DGTISAAK_	2	572.268	295
F7BNZ5	Breast carcinoma-amplified sequence 1 homolog	Bcas1	0.998967	2	T	1.10123e-07	KTSNS(0.001)VEKT(0.999)PS(1)PPEPEPAGTAQK	_KTSNSVEKT(ph)PS(ph)PPEPEPAGTAQK_	3	847.382	269
A2A7S8	Uncharacterized protein KIAA1522	Kiaa1522	0.998962	1	S	3.31864e-32	GS(0.999)PS(0.001)GGSTAETSDTASIR	_GS(ph)PSGGSTAETSDTASIR_	2	880.87	402
Q3UH59	Myosin-10	Myh10	0.998947	1	S	3.82853e-33	QLHIEGASLELS(0.999)DDDT(0.001)ESK	_QLHIEGASLELS(ph)DDDTESK_	3	722.986	1993
Q6NVE8	WD repeat-containing protein 44	Wdr44	0.998946	1	S	4.89766e-37	EYVSNDAT(0.001)QS(0.999)DDEEKLQSQQTDTDGGR	_EYVSNDATQS(ph)DDEEKLQSQQTDTDGGR_	3	1032.76	405
Q6P9K8	Caskin-1	Caskin1	0.998942	1	S	0.00440298	RGS(0.999)GEPAEQS(0.001)HFMEDGTAR	_RGS(ph)GEPAEQSHFMEDGTAR_	3	714.628	1083
D3YXR8	RIMS-binding protein 2	Rimbp2	0.998934	1	S	2.91418e-05	DHLS(0.999)PDFY(0.001)DESETDPGAEELPAR	_DHLS(ph)PDFYDESETDPGAEELPAR_	3	890.701	859
E0CXZ9	Voltage-gated potassium channel subunit beta-2	Kcnab2	0.998934	1	S	0.00015103	MYPESTT(0.001)GS(0.999)PAR	_(ac)MYPESTTGS(ph)PAR_	2	709.787	9
P56399	Ubiquitin carboxyl-terminal hydrolase 5	Usp5	0.998932	2	S	6.52671e-10	SAAES(1)IS(0.999)ES(0.001)VPVGPK	_SAAES(ph)IS(ph)ESVPVGPK_	2	809.344	785
Q8R4E6	Purine-rich element-binding protein gamma	Purg	0.998901	2;3	S	3.87371e-26	HS(0.001)APS(0.999)PPVS(1)VGS(1)EEHPHSVLK	_HSAPS(ph)PPVS(ph)VGS(ph)EEHPHSVLK_	3	806.669	159
Q9ESX5	H/ACA ribonucleoprotein complex subunit 4	Dkc1	0.998866	3	S	0.0100397	KRDS(1)ES(0.999)ES(0.998)DET(0.003)PTVPQLK	_KRDS(ph)ES(ph)ES(ph)DETPTVPQLK_	3	762.637	453
Q3UVX5	Metabotropic glutamate receptor 5	Grm5	0.998845	2	S	0.00389637	PRS(0.999)PS(0.995)PIS(0.004)T(0.002)LSHLAGSAGR	_PRS(ph)PS(ph)PISTLSHLAGSAGR_	3	684.321	1014
Q3UNH4	G protein-regulated inducer of neurite outgrowth 1	Gprin1	0.998832	1	S	5.3999e-20	ERPGS(0.999)T(0.001)GEGDLVSLR	_ERPGS(ph)TGEGDLVSLR_	2	826.886	219
A2A5Y6	Microtubule-associated protein	Mapt	0.998832	2;3	Y	5.354e-07	TDHGAEIVY(0.999)KS(0.998)PVVS(0.002)GDTSPR	_TDHGAEIVY(ph)KS(ph)PVVSGDTSPR_	2	1188.02	702
Q8JZW4	Copine-5	Cpne5	0.9988	2;3;4	S	6.85378e-07	PRPPPAAPAQS(0.001)PPQS(0.001)PAHS(0.998)PPGS(0.999)PVHT(0.001)HI	_PRPPPAAPAQSPPQSPAHS(ph)PPGS(ph)PVHTHI_	3	1024.81	587
Q9QYG0	Protein NDRG2	Ndrg2	0.998787	1;2;3	S	1.6348e-21	S(0.011)RT(0.989)AS(0.999)LT(0.001)SAASIDGSR	_SRT(ph)AS(ph)LTSAASIDGSR_	2	870.372	332
O35188	Fractalkine	Cx3cl1	0.998745	1	S	3.29484e-24	S(0.001)LGS(0.999)EEINPVHTDNFQER	_SLGS(ph)EEINPVHTDNFQER_	2	1076.47	262
P80560	Receptor-type tyrosine-protein phosphatase N2	Ptprn2	0.998735	1;2	S	6.61313e-18	KSEQPEEVLS(0.999)S(0.999)EEET(0.002)AGVEHVR	_KSEQPEEVLS(ph)S(ph)EEETAGVEHVR_	3	877.04	423
Q3UHB8		Gm1568	0.998693	1;2	S	3.66597e-07	S(0.001)FS(0.999)LGDLS(0.001)HSPQTAQHVER	_SFS(ph)LGDLSHSPQTAQHVER_	3	725.999	303
Q9Z2H5	Band 4.1-like protein 1	Epb41l1	0.998689	1	S	6.55844e-42	GPS(0.001)S(0.999)QEDESGGLEDSPDR	_GPSS(ph)QEDESGGLEDSPDR_	2	971.371	666
Q99JT2	Serine/threonine-protein kinase MST4	Mst4	0.998671	1	S	2.37868e-25	WKAEGHS(0.999)DEES(0.001)DSEGSDSESSSR	_WKAEGHS(ph)DEESDSEGSDSESSSR_	3	859.988	300
Q8K019	Bcl-2-associated transcription factor 1	Bclaf1	0.998633	1	S	2.1074e-09	KAEGEPQEES(0.999)PLKS(0.001)K	_KAEGEPQEES(ph)PLKSK_	2	868.909	177
Q8VCY8	Lipid phosphate phosphatase-related protein type 2	Lppr2	0.998581	1	S	7.32314e-18	LSPWEDLSQAPT(0.001)MDS(0.999)PLEKNPR	_LSPWEDLSQAPTMDS(ph)PLEKNPR_	3	864.4	312
Q8BTI8	Serine/arginine repetitive matrix protein 2	Srrm2	0.998577	3	S	3.94766e-05	HAS(1)S(0.999)S(0.984)PES(0.017)LKPTPAPGSR	_HAS(ph)S(ph)S(ph)PESLKPTPAPGSR_	2	1023.41	434
P63318	Protein kinase C gamma type	Prkcg	0.998564	1;2;3;4	S	3.39919e-54	MGPSSSPIPS(1)PS(1)PS(0.999)PT(0.001)DSKR	_MGPSSSPIPS(ph)PS(ph)PS(ph)PTDSKR_	2	1126.44	330
Q8K4R4	Cytoplasmic phosphatidylinositol transfer protein 1	Pitpnc1	0.998559	1	S	0.000796105	S(0.999)APET(0.001)LTLPDPEKK	_S(ph)APETLTLPDPEKK_	2	803.392	299
Q9ET77	Junctophilin-3	Jph3	0.998548	1	S	1.13482e-15	SLPVALES(0.999)DEET(0.001)GDELK	_SLPVALES(ph)DEETGDELK_	2	956.427	706
A2AJI0	MAP7 domain-containing protein 1	Map7d1	0.998546	1;3	S	0.000686907	AAEEKEPAAPAS(0.999)PAPS(0.986)PVPS(0.507)PT(0.507)PAQPQK	_AAEEKEPAAPAS(ph)PAPS(ph)PVPS(ph)PTPAQPQK_	3	997.438	544
Q6PAL8	DENN domain-containing protein 5A	Dennd5a	0.998537	1	S	0.0352377	FNS(0.999)Y(0.001)DISR	_FNS(ph)YDISR_	2	541.221	193
Q3TXS7	26S proteasome non-ATPase regulatory subunit 1	Psmd1	0.998525	1	T	9.21706e-25	T(0.001)VGT(0.999)PIASVPGSTNTGTVPGSEK	_TVGT(ph)PIASVPGSTNTGTVPGSEK_	2	1119.04	273
Q99P72	Reticulon-4	Rtn4	0.998522	1	S	3.281e-14	EAEEKLPS(0.999)DT(0.001)EKEDR	_EAEEKLPS(ph)DTEKEDR_	3	619.27	953
Q9QYB8	Beta-adducin	Add2	0.998518	1;2;3	S	8.53318e-18	DKTESVTS(0.001)GPLS(0.999)PEGS(0.984)PS(0.037)KS(0.86)PS(0.119)K	_DKTESVTSGPLS(ph)PEGS(ph)PSKS(ph)PSK_	3	848.018	692
A2AH25	Rho GTPase-activating protein 1	Arhgap1	0.998497	2;3	S	1.73355e-21	SDDS(0.998)KS(0.029)S(0.973)S(0.999)PEPVTHLK	_SDDS(ph)KSS(ph)S(ph)PEPVTHLK_	2	977.368	87
S4R1F9			0.99847	1;2	S	0.00242438	QS(0.002)DS(0.998)NAS(1)FLR	_QSDS(ph)NAS(ph)FLR_	2	642.737	27
G3X915	LysM and putative peptidoglycan-binding domain-containing protein 2	Lysmd2	0.998466	1	S	0.0266053	AHRPS(0.002)APS(0.998)PPPR	_AHRPSAPS(ph)PPPR_	3	450.554	24
E9QN52	Leucine-rich repeat flightless-interacting protein 2	Lrrfip2	0.99846	1	S	4.20043e-07	RGS(0.998)GDT(0.001)S(0.001)S(0.001)LIDPDTSLSELR	_RGS(ph)GDTSSLIDPDTSLSELR_	2	1093.5	111
O35344	Importin subunit alpha-3	Kpna3	0.998426	1	S	8.59427e-12	NVPQEES(0.998)LEDS(0.002)DVDADFK	_NVPQEES(ph)LEDSDVDADFK_	2	1058.93	56
V9GXH3			0.998417	1	S	4.00483e-05	SNQT(0.001)NHKPS(0.998)PDQDEEEGIWA	_SNQTNHKPS(ph)PDQDEEEGIWA_	3	787.992	981
Q8C6G8	WD repeat-containing protein 26	Wdr26	0.998415	1	S	0.00233187	RLS(0.998)QS(0.002)DEDVIR	_RLS(ph)QSDEDVIR_	2	699.325	101
Q02053	Ubiquitin-like modifier-activating enzyme 1	Uba1	0.998393	1	S	2.94402e-05	AT(0.002)LPS(0.998)PDKLPGFK	_ATLPS(ph)PDKLPGFK_	2	725.871	835
Q56A07	Sodium channel subunit beta-2	Scn2b	0.998391	1	S	1.77528e-90	EQKLS(0.998)T(0.002)DDLKTEEEGK	_EQKLS(ph)TDDLKTEEEGK_	2	965.438	192
P70441	Na(+)/H(+) exchange regulatory cofactor NHE-RF1	Slc9a3r1	0.998343	1;2	S	1.54276e-76	S(0.001)AS(0.998)S(0.001)DTSEELNS(0.013)QDS(0.987)PKR	_SAS(ph)SDTSEELNSQDS(ph)PKR_	2	1049.4	285
Q8JZW4	Copine-5	Cpne5	0.998328	1	S	6.80923e-07	FDLYDVDSKS(0.998)PDLS(0.001)K	_FDLYDVDSKS(ph)PDLSK_	2	904.903	103
Q2M3X8	Phosphatase and actin regulator 1	Phactr1	0.998275	1	S	1.99308e-05	S(0.002)KS(0.998)DTPYLAEAR	_SKS(ph)DTPYLAEAR_	2	709.322	67
Q62261	Spectrin beta chain, brain 1	Sptbn1	0.99825	1;2;3;4	S	1.04904e-29	T(0.448)S(0.582)S(0.97)KES(0.002)S(0.998)PVPS(0.991)PT(0.009)LDR	_TS(ph)S(ph)KESS(ph)PVPS(ph)PTLDR_	2	1004.36	2164
G5E884	Serine/threonine-protein kinase PAK 1	Pak1	0.99824	1	S	2.3758e-34	DVATSPIS(0.998)PT(0.002)ENNTTPPDALTR	_DVATSPIS(ph)PTENNTTPPDALTR_	2	1189.05	222
Q9CQU3	Protein RER1	Rer1	0.998228	1	S	5.20618e-17	VDPSLMEDS(0.998)DDGPS(0.002)LPTK	_VDPSLMEDS(ph)DDGPSLPTK_	2	991.919	95
D3Z4V2	Pre-mRNA 3'-end-processing factor FIP1	Fip1l1	0.998166	2	S	3.80727e-05	ERDHS(0.865)PT(0.135)PS(0.002)VFNS(0.998)DEER	_ERDHS(ph)PTPSVFNS(ph)DEER_	3	721.279	501
Q9Z0P4	Paralemmin-1	Palm	0.998154	2	S	8.22825e-71	ENSAAPS(0.005)PGRPQS(0.998)AS(0.997)PAKEEQK	_ENSAAPSPGRPQS(ph)AS(ph)PAKEEQK_	3	809.351	122
E9QKC6	Tripartite motif-containing protein 2	Trim2	0.998146	2	S	0.000390402	VIRS(1)ADVS(0.998)PT(0.002)TEGVKR	_VIRS(ph)ADVS(ph)PTTEGVKR_	3	625.631	454
P48678	Prelamin-A/C	Lmna	0.998097	2	S	0.00140796	LRLS(0.998)PS(0.974)PT(0.023)S(0.004)QR	_LRLS(ph)PS(ph)PTSQR_	2	701.318	390
Q6DFZ1		Gbf1	0.998094	1	S	3.47096e-46	ADAPDAGAQS(0.998)DS(0.002)ELPSYHQNDVSLDR	_ADAPDAGAQS(ph)DSELPSYHQNDVSLDR_	3	946.733	1298
Q9ESX5	H/ACA ribonucleoprotein complex subunit 4	Dkc1	0.998043	3	S	0.0100397	KRDS(1)ES(0.999)ES(0.998)DET(0.003)PTVPQLK	_KRDS(ph)ES(ph)ES(ph)DETPTVPQLK_	3	762.637	455
P55088	Aquaporin-4	Aqp4	0.998032	1	S	0.00344294	GS(0.998)Y(0.002)MEVEDNR	_GS(ph)YMEVEDNR_	2	640.237	276
Q9WV92	Band 4.1-like protein 3	Epb41l3	0.998022	1;2	S	3.09186e-46	TDTAADGET(0.002)S(0.998)ATES(1)DQEEDAEIK	_TDTAADGETS(ph)ATES(ph)DQEEDAEIK_	2	1286.97	543
Q3UNH4	G protein-regulated inducer of neurite outgrowth 1	Gprin1	0.99801	1	S	2.04127e-34	DLAAAAAQKS(0.998)PS(0.002)AEAAAPPPGPR	_DLAAAAAQKS(ph)PSAEAAAPPPGPR_	2	1112.54	691
A2AUD5	Tumor protein D54	Tpd52l2	0.997985	1	S	0.0190073	NS(0.001)AT(0.001)FKS(0.998)FEDR	_NSATFKS(ph)FEDR_	2	691.293	189
Q7TQF7	Amphiphysin	Amph	0.997982	2	T	0.00160062	IAKT(0.998)PS(0.982)PPEEPS(0.02)PLPSPTASPNHTLAPASPAPVRPR	_IAKT(ph)PS(ph)PPEEPSPLPSPTASPNHTLAPASPAPVRPR_	4	956.975	260
D3YUT2	Alpha-protein kinase 3	Alpk3	0.997971	1	S	0.00507977	AEERES(0.001)PT(0.001)VS(0.998)PR	_AEERESPTVS(ph)PR_	2	719.322	1169
Q9DC11	Plexin domain-containing protein 2	Plxdc2	0.99797	1	S	0.0053432	RGS(0.998)GHPAY(0.002)AEVEPVGEK	_RGS(ph)GHPAYAEVEPVGEK_	3	621.619	507
Q1HFZ0	tRNA (cytosine(34)-C(5))-methyltransferase	Nsun2	0.997897	1	S	0.00075377	EGVILT(0.002)NENAAS(0.998)PEQPGDEDAK	_EGVILTNENAAS(ph)PEQPGDEDAK_	3	788.679	723
Q3TXZ6	cGMP-dependent 3',5'-cyclic phosphodiesterase	Pde2a	0.997895	1	S	2.61772e-66	RPEAVQNT(0.002)S(0.998)VDASEDQKDEK	_RPEAVQNTS(ph)VDASEDQKDEK_	3	776.011	204
Q6PDI6	Protein FAM63B	Fam63b	0.997884	1	S	0.000670785	VT(0.002)AS(0.998)PELAEAAAGR	_VTAS(ph)PELAEAAAGR_	2	711.835	99
Q9EP97	Sentrin-specific protease 3	Senp3	0.997871	1	S	0.0135165	GS(0.998)PPVPS(0.002)GPPMEEDGLR	_GS(ph)PPVPSGPPMEEDGLR_	2	901.395	206
Q6PH08	ERC protein 2	Erc2	0.997821	1	S	1.9552e-11	SQHS(0.002)NHRPS(0.998)PDQDDEEGIWA	_SQHSNHRPS(ph)PDQDDEEGIWA_	3	795.656	946
Q99LH9	SH3 domain-binding protein 5-like	Sh3bp5l	0.997812	1	S	2.00589e-06	SEVVEDEGPRS(0.998)PVAEEPGGS(0.001)GSNSSETK	_SEVVEDEGPRS(ph)PVAEEPGGSGSNSSETK_	3	966.416	30
O35099	Mitogen-activated protein kinase kinase kinase 5	Map3k5	0.997749	1	S	5.90605e-05	TLFLGIPDENFEDHS(0.002)APPS(0.998)PEEK	_TLFLGIPDENFEDHSAPPS(ph)PEEK_	3	883.73	1040
Q99NF2	Nasal embryonic luteinizing hormone-releasing hormone factor	Nelf	0.997737	1	S	0.014622	S(0.001)WS(0.998)DPT(0.002)PMK	_SWS(ph)DPTPMK_	2	564.725	294
Q60875	Rho guanine nucleotide exchange factor 2	Arhgef2	0.997725	1;2	S	7.12211e-13	LS(0.998)PPHS(0.002)PR	_LS(ph)PPHSPR_	2	485.729	955
Q8VDJ3	Vigilin	Hdlbp	0.997689	1	S	0.00123903	VAT(0.002)LNS(0.998)EEENDPPTYK	_VATLNS(ph)EEENDPPTYK_	2	943.906	31
P70670	Nascent polypeptide-associated complex subunit alpha, muscle-specific form	Naca	0.997685	1	S	5.25684e-32	VQGEAVSNIQENTQTPT(0.002)VQEES(0.998)EEEEVDETGVEVK	_VQGEAVSNIQENTQTPTVQEES(ph)EEEEVDETGVEVK_	3	1314.25	2138
P05063	Fructose-bisphosphate aldolase C	Aldoc	0.997669	1	S	1.16682e-05	GILAADES(0.002)VGS(0.998)MAK	_GILAADESVGS(ph)MAK_	2	714.826	39
A0JNY3	Gephyrin	Gphn	0.997645	1	S	1.98446e-22	DTASLSTTPS(0.002)ES(0.998)PR	_DTASLSTTPSES(ph)PR_	2	764.83	306
P97427	Dihydropyrimidinase-related protein 1	Crmp1	0.997632	2	S	2.42174e-17	HAAPAPS(0.007)AKS(0.998)S(0.919)PS(0.076)KHQPPPIR	_HAAPAPSAKS(ph)S(ph)PSKHQPPPIR_	3	774.37	521
Q62172	RalA-binding protein 1	Ralbp1	0.997621	2	S	7.90181e-07	T(0.002)GEPS(0.998)PPHDVLHEPPDT(0.414)VS(0.586)DDDKDHGK	_TGEPS(ph)PPHDVLHEPPDTVS(ph)DDDKDHGK_	3	1027.76	48
Q5DTL9	Sodium-driven chloride bicarbonate exchanger	Slc4a10	0.997594	1	S	1.18675e-12	NDVS(0.998)RENS(0.002)TVDFSK	_NDVS(ph)RENSTVDFSK_	2	839.359	276
Q99LL5	Periodic tryptophan protein 1 homolog	Pwp1	0.997528	1	S	5.57069e-07	GKLQEEGGS(0.998)EEEEAGNPS(0.002)EDGMQSGPTQAPPR	_GKLQEEGGS(ph)EEEEAGNPSEDGMQSGPTQAPPR_	3	1126.81	49
B8QI35	Liprin-alpha-3	Ppfia3	0.997485	1	T	0.00105795	GEGPAVPGDT(0.997)PPPT(0.003)PR	_GEGPAVPGDT(ph)PPPTPR_	2	812.872	714
O35495	Cyclin-dependent kinase 14	Cdk14	0.997461	1	S	0.0237056	FGKADS(0.997)Y(0.003)EKLEK	_FGKADS(ph)YEKLEK_	3	498.901	134
Q9QYG0	Protein NDRG2	Ndrg2	0.997389	2	S	9.96296e-19	T(0.002)AS(0.998)LTSAAS(0.997)IDGS(0.003)R	_TAS(ph)LTSAAS(ph)IDGSR_	2	748.805	338
Q9WV92	Band 4.1-like protein 3	Epb41l3	0.997377	1	T	4.25667e-37	GISQTNLITT(0.003)VT(0.997)PEKK	_GISQTNLITTVT(ph)PEKK_	3	603.983	495
Q52KR3	Protein prune homolog 2	Prune2	0.997375	1	S	4.36941e-08	SSGQES(0.003)ES(0.997)IPEYTAEEEREDNR	_SSGQESES(ph)IPEYTAEEEREDNR_	3	874.687	2850
Q810U4	Neuronal cell adhesion molecule	Nrcam	0.997366	1	S	2.37526e-12	EDAHADPEIQPMKEDDGT(0.003)FGEYS(0.997)DAEDHKPLK	_EDAHADPEIQPMKEDDGTFGEYS(ph)DAEDHKPLK_	4	924.394	1178
Q64213	Splicing factor 1	Sf1	0.997302	2	S	1.92086e-06	TGDLGIPPNPEDRS(0.997)PS(0.988)PEPIY(0.011)NS(0.004)EGKR	_TGDLGIPPNPEDRS(ph)PS(ph)PEPIYNSEGKR_	3	1028.12	80
Q62417	Sorbin and SH3 domain-containing protein 1	Sorbs1	0.99729	1;2	S	1.03223e-11	GTPSSSPVSPQES(0.997)PKHES(0.002)K	_GTPSSSPVSPQES(ph)PKHESK_	3	682.644	62
B7ZBV9	Potassium voltage-gated channel subfamily KQT member 2	Kcnq2	0.997284	2	S	3.60056e-17	RS(0.94)PS(0.06)ADQSLDDS(0.997)PS(0.003)KVPK	_RS(ph)PSADQSLDDS(ph)PSKVPK_	3	691.968	476
Q8BTI8	Serine/arginine repetitive matrix protein 2	Srrm2	0.997281	1	S	0.000481256	DKFS(0.997)PT(0.001)QDRPESSTVLK	_DKFS(ph)PTQDRPESSTVLK_	3	672.321	1151
P56399	Ubiquitin carboxyl-terminal hydrolase 5	Usp5	0.997271	1	S	0.0015435	S(0.997)AAES(0.003)ISESVPVGPK	_S(ph)AAESISESVPVGPK_	2	769.361	779
P46935	E3 ubiquitin-protein ligase NEDD4	Nedd4	0.997202	1	T	1.22062e-25	RPS(0.003)PDDDLT(0.997)DEDNDDMQLQAQR	_RPSPDDDLT(ph)DEDNDDMQLQAQR_	3	885.361	287
O88737	Protein bassoon	Bsn	0.997198	1;2	S	6.83945e-49	SLSDPKPLS(0.997)PT(0.003)AEESAK	_SLSDPKPLS(ph)PTAEESAK_	2	918.935	2866
Q569Z6	Thyroid hormone receptor-associated protein 3	Thrap3	0.997159	1	S	0.000132581	RIDIS(0.997)PS(0.003)TFR	_RIDIS(ph)PSTFR_	2	636.311	679
P26645	Myristoylated alanine-rich C-kinase substrate	Marcks	0.997116	1	S	1.30563e-74	EAAEAEPAEPS(0.003)S(0.997)PAAEAEGASASSTSSPK	_EAAEAEPAEPSS(ph)PAAEAEGASASSTSSPK_	2	1398.59	113
Q3THK7	GMP synthase [glutamine-hydrolyzing]	Gmps	0.99711	1	S	1.20644e-14	TLNMTT(0.003)S(0.997)PEEK	_TLNMTTS(ph)PEEK_	2	665.783	332
P63085	Mitogen-activated protein kinase 1	Mapk1	0.997074	1	Y	1.08292e-32	VADPDHDHTGFLT(0.002)EY(0.997)VATR	_VADPDHDHTGFLTEY(ph)VATR_	3	741.995	185
A0JNY3	Gephyrin	Gphn	0.997067	2;3	S	6.81613e-13	VKEVHDELEDLPS(1)PPPPLS(0.997)PPPT(0.002)T(0.001)SPHK	_VKEVHDELEDLPS(ph)PPPPLS(ph)PPPTTSPHK_	3	1067.5	194
E9QAU4	Sickle tail protein	Etl4	0.997018	2	S	1.86209e-06	GDAAGDKLELS(0.01)EDS(0.993)PNS(0.997)EQELDKIGGK	_GDAAGDKLELSEDS(ph)PNS(ph)EQELDKIGGK_	3	988.092	1089
Q6P5F6	Zinc transporter ZIP10	Slc39a10	0.997007	1	S	6.44541e-20	LNETELTDLEAQQES(0.997)PPKNY(0.003)LGVEEEK	_LNETELTDLEAQQES(ph)PPKNYLGVEEEK_	3	1061.83	593
G3X9G2	Misshapen-like kinase 1	Mink1	0.99699	1	S	2.19597e-07	QNS(0.997)DPT(0.003)SEGPGPSPNPPSWVRPDNEAPPK	_QNS(ph)DPTSEGPGPSPNPPSWVRPDNEAPPK_	3	1045.47	644
P31650	Sodium- and chloride-dependent GABA transporter 3	Slc6a11	0.99696	1	S	4.33556e-05	AAEEARGS(0.997)ET(0.003)LGGGGGGAAGTR	_AAEEARGS(ph)ETLGGGGGGAAGTR_	2	1006.45	21
P80560	Receptor-type tyrosine-protein phosphatase N2	Ptprn2	0.996938	1	S	9.43881e-119	ADSVAGAIQSDPAEGS(0.997)QES(0.003)HGR	_ADSVAGAIQSDPAEGS(ph)QESHGR_	3	750.32	339
Q5SRX1	TOM1-like protein 2	Tom1l2	0.996882	1	S	1.61491e-07	GIEFPMADLDALS(0.997)PIHT(0.003)PQR	_GIEFPM(ox)ADLDALS(ph)PIHTPQR_	3	768.696	160
Q5SSM3	Rho GTPase-activating protein 44	Arhgap44	0.996875	1	S	1.03022e-11	HSATDKRDS(0.997)EEES(0.003)ESTAL	_HSATDKRDS(ph)EEESESTAL_	2	1036.43	805
Q6P5B5	Fragile X mental retardation syndrome-related protein 2	Fxr2	0.996826	2	S	0.000331283	T(0.034)DGS(0.966)IS(0.997)GDRQPVT(0.003)VADYISR	_TDGS(ph)IS(ph)GDRQPVTVADYISR_	3	766.333	605
Q9Z0P4	Paralemmin-1	Palm	0.996791	2	S	1.60858e-06	T(0.064)S(0.075)T(0.861)PVRS(0.997)PGGS(0.002)T(0.001)MMK	_TST(ph)PVRS(ph)PGGSTMMK_	3	566.233	157
O88737	Protein bassoon	Bsn	0.996789	4	T	3.18895e-05	S(0.999)KT(0.997)PPS(0.7)NLS(0.305)PIEDAS(0.964)PT(0.036)EELR	_S(ph)KT(ph)PPS(ph)NLSPIEDAS(ph)PTEELR_	3	863.338	1102
A1L3P4	Sodium/hydrogen exchanger	Slc9a6	0.996651	1	S	6.87073e-26	LVLPMDDSEPALNSLDDT(0.003)RHS(0.997)PA	_LVLPMDDSEPALNSLDDTRHS(ph)PA_	3	858.391	700
Q9WTQ5	A-kinase anchor protein 12	Akap12	0.996641	2	S	1.66691e-25	EKEPTKPLES(0.997)PT(0.038)S(0.965)PVSNETTSSFK	_EKEPTKPLES(ph)PTS(ph)PVSNETTSSFK_	3	927.415	270
Q9EQF6	Dihydropyrimidinase-related protein 5	Dpysl5	0.996636	2	T	8.89682e-15	EMGT(1)PLADT(0.997)PT(0.003)RPVTR	_EMGT(ph)PLADT(ph)PTRPVTR_	2	951.415	514
D3YXJ0		Dgkh	0.996632	3	S	7.15574e-13	AGAGSQHHPQGVAGGAVAGASAVS(0.005)PT(0.013)AAGPGEDS(0.997)S(0.997)DS(0.988)EAEQEGPQK	_AGAGSQHHPQGVAGGAVAGASAVSPTAAGPGEDS(ph)S(ph)DS(ph)EAEQEGPQK_	4	1113.71	35
D3YXJ0		Dgkh	0.996632	3	S	7.15574e-13	AGAGSQHHPQGVAGGAVAGASAVS(0.005)PT(0.013)AAGPGEDS(0.997)S(0.997)DS(0.988)EAEQEGPQK	_AGAGSQHHPQGVAGGAVAGASAVSPTAAGPGEDS(ph)S(ph)DS(ph)EAEQEGPQK_	4	1113.71	36
Q9JIX8	Apoptotic chromatin condensation inducer in the nucleus	Acin1	0.996609	2	S	0.00734735	S(0.045)QS(0.958)PS(0.997)PPPLPEDLEK	_SQS(ph)PS(ph)PPPLPEDLEK_	2	890.876	391
Q6PAJ1	Breakpoint cluster region protein	Bcr	0.996577	1	S	2.77396e-18	ASAPRPPPAPADGADPAPVEESEARPDGEGS(0.997)PS(0.003)K	_ASAPRPPPAPADGADPAPVEESEARPDGEGS(ph)PSK_	3	1130.51	122
Q5EBP8	Heterogeneous nuclear ribonucleoprotein A1	Hnrnpa1	0.996509	1;2	S	3.17877e-05	S(0.956)KS(0.048)ES(0.997)PKEPEQLR	_(ac)S(ph)KSES(ph)PKEPEQLR_	2	858.866	6
Q5SWZ5	Myosin phosphatase Rho-interacting protein	Mprip	0.996504	1	S	3.64177e-12	AATEALGEKS(0.997)PEGT(0.003)T(0.001)VSGYDIMK	_AATEALGEKS(ph)PEGTTVSGYDIMK_	3	812.373	2208
D3YUJ3		Ccnyl1	0.996448	1	S	4.66248e-13	S(0.004)LS(0.996)ADNFIGIQR	_SLS(ph)ADNFIGIQR_	2	700.832	352
P14873	Microtubule-associated protein 1B	Map1b	0.996432	1;2	S	4.8692e-53	AS(0.001)LS(0.999)PMDEPVPDS(0.004)ES(0.996)PVEK	_ASLS(ph)PMDEPVPDSES(ph)PVEK_	2	1087.44	1384
B7ZCJ1	Rho GTPase-activating protein 21	Arhgap21	0.996386	1	S	1.46815e-10	S(0.004)KS(0.996)YDEGLDDYREDAK	_SKS(ph)YDEGLDDYREDAK_	3	657.605	885
Q68FH0	Plakophilin-4	Pkp4	0.996366	1;2;3	S	8.1398e-13	S(0.004)PS(0.996)IDSIQKDPR	_SPS(ph)IDSIQKDPR_	2	711.835	511
O35927	Catenin delta-2	Ctnnd2	0.996366	1	S	4.08198e-05	S(0.004)PS(0.996)IDSIQKDPR	_SPS(ph)IDSIQKDPR_	2	711.835	531
Q9WTS4	Teneurin-1	Odz1	0.996351	2	S	6.67281e-10	HGYQLEMGS(0.996)DVDT(0.004)ETEGAAS(1)PDHALR	_HGYQLEMGS(ph)DVDTETEGAAS(ph)PDHALR_	3	982.726	105
A2ARP8	Microtubule-associated protein 1A	Mtap1a	0.996339	1	S	0.00308898	KHS(0.996)PGEIT(0.004)GPGGHFMTSDSSLTK	_KHS(ph)PGEITGPGGHFMTSDSSLTK_	3	817.705	1527
P14873	Microtubule-associated protein 1B	Map1b	0.996312	1	S	9.80156e-19	QGFPDRES(0.996)PVS(0.004)DLTSTGLYQDK	_QGFPDRES(ph)PVSDLTSTGLYQDK_	3	840.715	1438
Q5DQR4	Syntaxin-binding protein 5-like	Stxbp5l	0.996266	2	S	6.72791e-11	SLSGSTNTVS(0.996)S(0.966)EGVT(0.038)K	_SLSGSTNTVS(ph)S(ph)EGVTK_	2	857.353	597
P68404	Protein kinase C beta type	Prkcb	0.996227	1	T	0.000150745	QPVELT(0.996)PT(0.004)DK	_QPVELT(ph)PTDK_	2	604.284	642
P05480	Neuronal proto-oncogene tyrosine-protein kinase Src	Src	0.99607	1	S	8.80335e-31	S(0.996)LEPS(0.004)ENVHGAGGAFPASQTPSKPASADGHR	_S(ph)LEPSENVHGAGGAFPASQTPSKPASADGHR_	3	1047.15	17
Q9QYX7	Protein piccolo	Pclo	0.996069	1;2;3	S	4.86648e-53	TPPSNLS(1)PIEDAS(0.996)PT(0.004)EELR	_TPPSNLS(ph)PIEDAS(ph)PTEELR_	2	1106.97	1772
Q03517	Secretogranin-2	Scg2	0.995976	1	S	2.33241e-07	IETQT(0.001)QEEVRDS(0.996)KENT(0.003)EK	_IETQTQEEVRDS(ph)KENTEK_	3	748.672	270
Q9D4C9	Clavesin-1	Clvs1	0.995942	1	S	0.00232573	S(0.004)QS(0.996)VVEAGTLK	_SQS(ph)VVEAGTLK_	2	599.789	329
Q80ZX8	Sperm-associated antigen 1	Spag1	0.995928	2	S	8.4043e-07	IQVQEVDGS(0.996)S(0.996)DEEPERPAEAS(0.002)AT(0.003)S(0.003)APAR	_IQVQEVDGS(ph)S(ph)DEEPERPAEASATSAPAR_	3	1029.44	739
Q80ZX8	Sperm-associated antigen 1	Spag1	0.995928	2	S	8.4043e-07	IQVQEVDGS(0.996)S(0.996)DEEPERPAEAS(0.002)AT(0.003)S(0.003)APAR	_IQVQEVDGS(ph)S(ph)DEEPERPAEASATSAPAR_	3	1029.44	740
D9HP81	Regulating synaptic membrane exocytosis protein 2	Rims2	0.995816	1	S	0.000267006	RHS(0.996)DVS(0.004)LANAELEDSR	_RHS(ph)DVSLANAELEDSR_	3	626.95	369
Q8K019	Bcl-2-associated transcription factor 1	Bclaf1	0.995812	1	S	0.00116543	RIDIS(0.996)PS(0.004)ALR	_RIDIS(ph)PSALR_	2	604.313	656
Q9WV69	Dematin	Epb49	0.995803	3	S	0.0233018	S(0.64)T(0.681)S(0.681)PPPS(0.996)PEVWAES(0.002)R	_ST(ph)S(ph)PPPS(ph)PEVWAESR_	2	933.841	96
P14873	Microtubule-associated protein 1B	Map1b	0.995742	1	S	9.10481e-06	RES(0.996)VVS(0.004)GDDRAEEDMDDVLEK	_RES(ph)VVSGDDRAEEDMDDVLEK_	3	825.351	989
A0A087WQE8	Kinesin-like protein KIF1A	Kif1a	0.995725	1	S	6.86261e-27	S(0.004)DS(0.996)LILDHQWELEK	_SDS(ph)LILDHQWELEK_	2	896.911	1471
P60904	DnaJ homolog subfamily C member 5	Dnajc5	0.9957	1	S	3.43797e-36	SLS(0.996)T(0.004)SGESLYHVLGLDKNATSDDIKK	_SLS(ph)TSGESLYHVLGLDKNATSDDIKK_	3	953.465	10
Q6PHU5	Sortilin	Sort1	0.995484	1	S	0.000542258	S(0.005)GYHDDS(0.995)DEDLLE	_SGYHDDS(ph)DEDLLE_	2	787.78	819
Q9JLM8	Serine/threonine-protein kinase DCLK1	Dclk1	0.995475	3	S	6.22004e-07	S(0.005)GKS(0.995)PS(0.988)PS(0.019)PT(0.366)S(0.624)PGS(0.004)LR	_SGKS(ph)PS(ph)PSPTS(ph)PGSLR_	2	891.349	330
Q9ES97	Reticulon-3	Rtn3	0.995458	1	S	3.02297e-34	ETTGGAPT(0.005)MS(0.995)PDLEQEQLTIR	_ETTGGAPTMS(ph)PDLEQEQLTIR_	2	1177.53	673
E9Q9C3	Afadin	Mllt4	0.99533	1	S	1.47112e-10	YVLSSQHRPDIS(0.995)PT(0.005)ER	_YVLSSQHRPDIS(ph)PTER_	2	982.965	655
Q3UGS4	Protein FAM195B	Fam195b	0.995279	1	S	3.42974e-24	S(0.995)PT(0.005)NSSEIFTPAHEENVR	_S(ph)PTNSSEIFTPAHEENVR_	2	1047.96	21
P53986	Monocarboxylate transporter 1	Slc16a1	0.995251	1	S	1.81775e-07	S(0.005)KES(0.995)LQEAGKSDANTDLIGGSPK	_SKES(ph)LQEAGKSDANTDLIGGSPK_	3	804.715	213
Q3UVX5	Metabotropic glutamate receptor 5	Grm5	0.995241	2	S	0.00389637	PRS(0.999)PS(0.995)PIS(0.004)T(0.002)LSHLAGSAGR	_PRS(ph)PS(ph)PISTLSHLAGSAGR_	3	684.321	1016
Q9QYX7	Protein piccolo	Pclo	0.995219	1	T	8.9554e-15	IVDSGVQT(0.995)DDEET(0.005)ADR	_IVDSGVQT(ph)DDEETADR_	2	915.375	3376
Q6NXN1	UPF0485 protein C1orf144 homolog	D4Ertd22e	0.995191	1	S	4.34246e-07	ILGS(0.005)AS(0.995)PEEEQEKPILDRPTR	_ILGSAS(ph)PEEEQEKPILDRPTR_	3	815.739	107
Q8CI71	Coiled-coil domain-containing protein 132	Ccdc132	0.995134	2	S	5.10273e-06	FLEQS(0.011)RS(0.953)PS(0.037)VS(0.995)PS(0.004)K	_FLEQSRS(ph)PSVS(ph)PSK_	2	854.871	498
P11798	Calcium/calmodulin-dependent protein kinase type II subunit alpha	Camk2a	0.995071	1;2;3;4	S	2.75269e-137	KNDGVKES(0.944)S(0.995)ES(0.03)T(0.03)NT(0.001)TIEDEDTK	_KNDGVKES(ph)S(ph)ESTNTTIEDEDTK_	2	1294.02	331
Q7TQF7	Amphiphysin	Amph	0.995008	1;2	S	2.93415e-31	T(0.004)PS(0.995)PPEEPS(0.001)PLPSPTASPNHTLAPASPAPVRPR	_TPS(ph)PPEEPSPLPSPTASPNHTLAPASPAPVRPR_	3	1144.9	262
Q6WVG3	BTB/POZ domain-containing protein KCTD12	Kctd12	0.99476	1	S	5.1794e-12	S(0.995)PS(0.005)GGAAGPLLTPSQSLDGSRR	_S(ph)PSGGAAGPLLTPSQSLDGSRR_	2	1096.03	187
P11798	Calcium/calmodulin-dependent protein kinase type II subunit alpha	Camk2a	0.994651	2;3;4	S	4.45034e-66	ESS(0.005)ES(0.995)TNT(0.999)T(0.001)IEDEDTKVR	_ESSES(ph)TNT(ph)TIEDEDTKVR_	2	1100.93	333
O88935	Synapsin-1	Syn1	0.994577	1	S	5.15193e-21	GSHSQSS(0.003)S(0.995)PGALT(0.002)LGR	_GSHSQSSS(ph)PGALTLGR_	2	811.37	438
Q9R0P4	Small acidic protein	Smap	0.994508	1	S	7.93151e-58	S(0.005)AS(0.995)PDDDLGSSNWEAADLGNEER	_SAS(ph)PDDDLGSSNWEAADLGNEER_	2	1258	17
O35607	Bone morphogenetic protein receptor type-2	Bmpr2	0.993935	1	S	8.42717e-20	LNINS(0.006)S(0.994)PDEHEPLLR	_LNINSS(ph)PDEHEPLLR_	2	907.428	863
P55088	Aquaporin-4	Aqp4	0.99391	1	S	0.000741614	S(0.994)QVET(0.006)EDLILKPGVVHVIDIDRGEEK	_S(ph)QVETEDLILKPGVVHVIDIDRGEEK_	4	750.384	285
O35136	Neural cell adhesion molecule 2	Ncam2	0.99384	1	S	3.09389e-12	IT(0.006)NHEDGS(0.994)PVNEPNETTPLTEPEKLPLKEENGK	_ITNHEDGS(ph)PVNEPNETTPLTEPEKLPLKEENGK_	4	934.945	786
Q6Q477		Atp2b4	0.99383	1	S	1.94338e-12	TQDGVALEIQPLNS(0.994)QEGLDS(0.006)EDKEK	_TQDGVALEIQPLNS(ph)QEGLDSEDKEK_	3	941.769	329
E0CXB9	Catenin alpha-2	Ctnna2	0.9936	1;2;3	S	4.83584e-53	SRT(0.006)S(0.994)VQTEDDQLIAGQSAR	_SRTS(ph)VQTEDDQLIAGQSAR_	2	1071.49	667
P06837	Neuromodulin	Gap43	0.99334	1	T	2.29972e-34	QADVPAAVTDAAAT(0.005)T(0.993)PAAEDAAT(0.001)K	_QADVPAAVTDAAATT(ph)PAAEDAATK_	2	1168.54	172
Q8K019	Bcl-2-associated transcription factor 1	Bclaf1	0.993282	1	S	3.23472e-08	ADGDWDDQEVLDYFS(0.993)DKES(0.007)AK	_ADGDWDDQEVLDYFS(ph)DKESAK_	3	838.339	383
Q60902	Epidermal growth factor receptor substrate 15-like 1	Eps15l1	0.993241	2	S	1.68626e-11	STPSHGSVSSLNS(0.001)T(0.007)GS(0.993)LS(0.999)PK	_STPSHGSVSSLNSTGS(ph)LS(ph)PK_	3	697.299	253
P08553	Neurofilament medium polypeptide	Nefm	0.993207	2	T	0.00115502	EGS(0.475)S(0.531)EKDEGEQEEEEGET(0.993)EAEGEGEEAEAK	_EGSS(ph)EKDEGEQEEEEGET(ph)EAEGEGEEAEAK_	3	1129.74	565
Q8K382	DENN domain-containing protein 1A	Dennd1a	0.993179	1	S	3.17484e-07	ESDSAEGDET(0.007)ES(0.993)PEQLVR	_ESDSAEGDETES(ph)PEQLVR_	2	1029.41	546
Q80UP8	Sodium-dependent phosphate transporter 2	Slc20a2	0.993162	1	S	0.000500131	ES(0.001)ALS(0.006)RAS(0.993)DESLR	_ESALSRAS(ph)DESLR_	2	750.838	256
E9QNN1		Dhx9	0.993147	1	S	2.62444e-35	AEAENNSGVESSGYGS(0.993)PGPT(0.007)WDR	_AEAENNSGVESSGYGS(ph)PGPTWDR_	2	1223.99	137
Q62261	Spectrin beta chain, brain 1	Sptbn1	0.993064	2;3;4	S	1.04904e-29	T(0.091)S(0.12)S(0.789)KES(0.212)S(0.788)PVPS(0.993)PT(0.007)LDR	_TSS(ph)KESS(ph)PVPS(ph)PTLDR_	2	964.378	2168
A2AI52	Ubiquitin carboxyl-terminal hydrolase	Usp8	0.993016	1	S	4.95795e-49	SYS(0.993)S(0.007)PDITQALQEEEKR	_SYS(ph)SPDITQALQEEEKR_	2	1030.96	691
Q62261	Spectrin beta chain, brain 1	Sptbn1	0.99296	2;3;4	S	1.48658e-16	T(0.003)S(0.004)S(0.993)KES(0.357)S(0.643)PVPSPTLDR	_TSS(ph)KESS(ph)PVPSPTLDR_	2	924.395	2160
Q9QYG0	Protein NDRG2	Ndrg2	0.992943	2;3	T	1.6348e-21	S(0.991)RT(0.993)AS(0.015)LTSAASIDGSR	_S(ph)RT(ph)ASLTSAASIDGSR_	2	870.372	330
Q4KMM3	Oxidation resistance protein 1	Oxr1	0.992938	2	S	1.68756e-14	VVS(0.98)S(0.02)T(0.007)S(0.993)EEEEAFTEK	_VVS(ph)STS(ph)EEEEAFTEK_	2	916.35	204
B0QZN5	Vesicle-associated membrane protein 2	Vamp2	0.992909	1	S	2.94981e-05	ADALQAGAS(0.993)QFET(0.006)S(0.002)AAK	_ADALQAGAS(ph)QFETSAAK_	2	873.391	75
Q61214	Dual specificity tyrosine-phosphorylation-regulated kinase 1A	Dyrk1a	0.992749	1	Y	0.042245	IYQY(0.993)IQS(0.007)R	_IYQY(ph)IQSR_	2	575.768	321
E0CX32	Coiled-coil domain-containing protein 85A	Ccdc85a	0.992674	1	S	0.00904605	HHAS(0.007)GGS(0.993)PEHLQKPR	_HHASGGS(ph)PEHLQKPR_	4	430.203	228
Q68FF6	ARF GTPase-activating protein GIT1	Git1	0.992621	1	S	2.03181e-08	HGS(0.993)GADS(0.007)DYENTQSGDPLLGLEGK	_HGS(ph)GADSDYENTQSGDPLLGLEGK_	3	843.026	601
A2ARP8	Microtubule-associated protein 1A	Mtap1a	0.992582	1	S	5.85375e-10	SEPQDFQEDS(0.993)WGDT(0.007)K	_SEPQDFQEDS(ph)WGDTK_	2	924.852	1261
Q8BTI8	Serine/arginine repetitive matrix protein 2	Srrm2	0.992547	2	S	1.21044e-05	RS(0.275)S(0.64)S(0.092)ELS(0.993)PEVVEK	_RSS(ph)SELS(ph)PEVVEK_	2	803.842	1343
Q80X80	C2 domain-containing protein 2-like	C2cd2l	0.99252	1	T	0.000513705	NLGT(0.993)PT(0.007)SSTPRPSITPTK	_NLGT(ph)PTSSTPRPSITPTK_	2	967.983	417
Q6PDG5	SWI/SNF complex subunit SMARCC2	Smarcc2	0.992423	1	S	1.2359e-05	TLTDEVNS(0.992)PDS(0.008)DRR	_TLTDEVNS(ph)PDSDRR_	3	562.244	283
Q3UHD9	Arf-GAP with GTPase, ANK repeat and PH domain-containing protein 2	Agap2	0.992252	1	S	0.000447537	LRT(0.007)DS(0.992)QS(0.001)EAVAIQAIR	_LRTDS(ph)QSEAVAIQAIR_	2	919.462	921
H3BJS0	Cutaneous T-cell lymphoma-associated antigen 5 homolog	Ctage5	0.992188	1	S	0.0253265	S(0.008)LS(0.992)PPWEQDRR	_SLS(ph)PPWEQDRR_	2	725.827	599
Q99P72	Reticulon-4	Rtn4	0.992035	1	S	1.79066e-57	MEDIDQSSLVSSS(0.008)ADS(0.992)PPRPPPAFK	_(ac)MEDIDQSSLVSSSADS(ph)PPRPPPAFK_	2	1390.63	16
B7ZCJ1	Rho GTPase-activating protein 21	Arhgap21	0.991912	2	S	0.0284703	KGS(0.992)S(0.94)S(0.067)EVFS(0.001)DAAR	_KGS(ph)S(ph)SEVFSDAAR_	2	750.792	928
Q9Z0P4	Paralemmin-1	Palm	0.991865	1;2	T	6.14458e-43	EENQTGPTT(0.008)T(0.992)PS(0.963)DT(0.037)QDLDMK	_EENQTGPTTT(ph)PS(ph)DTQDLDMK_	2	1184.45	363
Q8JZQ9	Eukaryotic translation initiation factor 3 subunit B	Eif3b	0.991854	2	S	5.89055e-19	AKPAAQSEEETAT(0.053)S(0.947)PAAS(0.992)PT(0.008)PQSAER	_AKPAAQSEEETATS(ph)PAAS(ph)PTPQSAER_	2	1386.59	79
O88737	Protein bassoon	Bsn	0.99164	1;2	S	1.04073e-16	S(0.008)LS(0.992)DPKPLS(0.992)PT(0.008)AEESAK	_SLS(ph)DPKPLS(ph)PTAEESAK_	2	958.918	2860
B1AY10	Transcriptional repressor NF-X1	Nfx1	0.99152	1	S	0.000299218	EHS(0.992)PS(0.007)ES(0.001)EKEVVIADPR	_EHS(ph)PSESEKEVVIADPR_	3	663.637	147
O35607	Bone morphogenetic protein receptor type-2	Bmpr2	0.991457	1	S	9.55346e-21	ES(0.009)S(0.991)DENLMEHSLK	_ESS(ph)DENLMEHSLK_	2	799.824	681
O88935	Synapsin-1	Syn1	0.991422	1	S	7.36837e-21	TNT(0.008)GS(0.991)AMLEQIAMSDR	_TNTGS(ph)AMLEQIAMSDR_	2	902.884	341
B2RUG9		Apc	0.991288	1	S	0.00209617	DLQRPDS(0.001)EHAFS(0.991)PDS(0.008)ENFDWK	_DLQRPDSEHAFS(ph)PDSENFDWK_	3	867.362	2092
O88737	Protein bassoon	Bsn	0.991202	1	S	1.45664e-07	TIELNSTGSYGHELDLGQGPDPNLDREPELEMES(0.001)LT(0.008)GS(0.991)PEDR	_TIELNSTGSYGHELDLGQGPDPNLDREPELEMESLTGS(ph)PEDR_	4	1170.27	980
Q9QYG0	Protein NDRG2	Ndrg2	0.991154	2;3	S	0.0103715	S(0.991)RT(0.993)AS(0.015)LTSAASIDGSR	_S(ph)RT(ph)ASLTSAASIDGSR_	2	870.372	328
Q80X50	Ubiquitin-associated protein 2-like	Ubap2l	0.990678	1	S	9.59084e-09	STS(0.001)APQMS(0.991)PGS(0.004)S(0.003)DNQSSSPQPAQQK	_STSAPQMS(ph)PGSSDNQSSSPQPAQQK_	3	871.369	487
Q9D394	Protein RUFY3	Rufy3	0.990661	1	T	2.51478e-09	S(0.009)ALT(0.991)PPTDMPTPTTDK	_(ac)SALT(ph)PPTDMPTPTTDK_	2	897.897	5
Q9WV69	Dematin	Epb49	0.990589	1;3	S	5.58692e-07	S(0.005)T(0.005)S(0.991)PPPSPEVWAESR	_STS(ph)PPPSPEVWAESR_	2	853.875	92
Q9QXW9	Large neutral amino acids transporter small subunit 2	Slc7a8	0.990186	2	S	0.00227468	NHPGS(0.99)DT(0.533)S(0.477)PEAEASSGGGGVALK	_NHPGS(ph)DT(ph)SPEAEASSGGGGVALK_	2	1142.96	18
Q9QYX7	Protein piccolo	Pclo	0.990155	2	S	0.000309904	SHGPLLPT(0.02)IEDS(0.99)S(0.989)EEEELREEEELLKEQEK	_SHGPLLPTIEDS(ph)S(ph)EEEELREEEELLKEQEK_	4	921.413	1708
Q9DCP2	Sodium-coupled neutral amino acid transporter 3	Slc38a3	0.990077	1	S	1.83861e-09	S(0.01)PS(0.99)KEPHFTDFEGK	_SPS(ph)KEPHFTDFEGK_	2	843.364	53
Q68FM7		Arhgef11	0.990005	1	S	0.000154322	HPGDAPVLNHPS(0.99)PPGS(0.01)QEPAYQGSTSSR	_HPGDAPVLNHPS(ph)PPGSQEPAYQGSTSSR_	3	984.109	1125
A2A5Y6	Microtubule-associated protein	Mapt	0.989998	2	S	3.08725e-10	T(0.005)T(0.005)PS(0.99)PKT(0.998)PPGS(0.002)GEPPK	_TTPS(ph)PKT(ph)PPGSGEPPK_	2	869.378	486
S4R291	Ankyrin-2	Ank2	0.989808	1	S	2.60762e-07	ERAEGFES(0.99)ES(0.01)EDGATKPK	_ERAEGFES(ph)ESEDGATKPK_	3	682.96	3374
S4R291	Ankyrin-2	Ank2	0.98951	1;2	T	2.22009e-26	VGT(0.99)PT(0.633)DIHS(0.377)EKELPIT(0.001)NDITDSSQK	_VGT(ph)PT(ph)DIHSEKELPITNDITDSSQK_	3	962.433	2227
E9Q9C3	Afadin	Mllt4	0.989464	1	S	0.0189655	T(0.001)S(0.009)S(0.989)VVTLEVAK	_TSS(ph)VVTLEVAK_	2	607.307	1090
Q9QYX7	Protein piccolo	Pclo	0.989441	2	S	0.000309904	SHGPLLPT(0.02)IEDS(0.99)S(0.989)EEEELREEEELLKEQEK	_SHGPLLPTIEDS(ph)S(ph)EEEELREEEELLKEQEK_	4	921.413	1709
A2ANP1	Protein FAM219A	2310028H24Rik	0.989333	1	S	1.59952e-14	GYSSLDQSPDEKPLVALDT(0.011)DS(0.989)DDDFDMSR	_GYSSLDQSPDEKPLVALDTDS(ph)DDDFDMSR_	3	1100.13	98
B2RRE2		Myo18a	0.989259	1	S	6.64283e-08	EPADLDPEAAS(0.989)PAYS(0.011)QAK	_EPADLDPEAAS(ph)PAYSQAK_	2	970.42	340
Q99L43	Phosphatidate cytidylyltransferase 2	Cds2	0.98917	1;2	S	1.02039e-19	VVREDAPPEDKES(0.989)ES(0.011)EAK	_VVREDAPPEDKES(ph)ESEAK_	3	698.979	20
Q9Z2I9	Succinyl-CoA ligase [ADP-forming] subunit beta, mitochondrial	Sucla2	0.988856	1	S	4.66379e-05	INFDS(0.989)NS(0.011)AYR	_INFDS(ph)NSAYR_	2	633.761	279
Q8VCV2	Protein NDRG3	Ndrg3	0.988793	2	S	5.53084e-29	THSTS(0.002)S(0.397)S(0.601)IGS(0.989)GES(0.009)PFS(0.002)R	_THSTSSS(ph)IGS(ph)GESPFSR_	2	942.364	351
Q61609	Sodium-dependent phosphate transporter 1	Slc20a1	0.988777	2	S	0.0238987	S(0.498)S(0.498)PS(0.015)ES(0.989)PLMEK	_S(ph)SPSES(ph)PLMEK_	2	676.248	273
P05063	Fructose-bisphosphate aldolase C	Aldoc	0.988659	1	S	5.42754e-06	GILAADES(0.989)VGS(0.011)MAK	_GILAADES(ph)VGSMAK_	2	714.826	36
Q80YA9	Connector enhancer of kinase suppressor of ras 2	Cnksr2	0.988247	1	S	2.9897e-13	GS(0.012)ES(0.988)PNSFLDQEYR	_GSES(ph)PNSFLDQEYR_	2	854.846	390
Q9WV92	Band 4.1-like protein 3	Epb41l3	0.988189	1	S	5.34093e-14	VESTSVGS(0.012)IS(0.988)PGGAK	_VESTSVGSIS(ph)PGGAK_	2	728.34	804
P35564	Calnexin	Canx	0.988179	1	S	3.10343e-35	QKSDAEEDGVT(0.012)GS(0.988)QDEEDSKPK	_QKSDAEEDGVTGS(ph)QDEEDSKPK_	2	1230.01	563
D3YXJ0		Dgkh	0.988056	3	S	7.15574e-13	AGAGSQHHPQGVAGGAVAGASAVS(0.005)PT(0.013)AAGPGEDS(0.997)S(0.997)DS(0.988)EAEQEGPQK	_AGAGSQHHPQGVAGGAVAGASAVSPTAAGPGEDS(ph)S(ph)DS(ph)EAEQEGPQK_	4	1113.71	38
Q8VD37	SH3-containing GRB2-like protein 3-interacting protein 1	Sgip1	0.98802	1	S	4.88258e-33	T(0.012)GS(0.988)PLTVATGNDQAATEAK	_TGS(ph)PLTVATGNDQAATEAK_	2	956.438	265
Q9D3L3	Synaptosomal-associated protein	Snap23	0.98801	1	S	8.98623e-16	ATWGDGGDNS(0.988)PS(0.012)NVVSK	_ATWGDGGDNS(ph)PSNVVSK_	2	885.87	121
Q68FF6	ARF GTPase-activating protein GIT1	Git1	0.987795	1	S	5.12326e-06	SLS(0.012)S(0.988)PTDNLELSAR	_SLSS(ph)PTDNLELSAR_	2	785.361	371
Q64213	Splicing factor 1	Sf1	0.987669	2	S	1.92086e-06	TGDLGIPPNPEDRS(0.997)PS(0.988)PEPIY(0.011)NS(0.004)EGKR	_TGDLGIPPNPEDRS(ph)PS(ph)PEPIYNSEGKR_	3	1028.12	82
Q9JLM8	Serine/threonine-protein kinase DCLK1	Dclk1	0.987652	3	S	6.22004e-07	S(0.005)GKS(0.995)PS(0.988)PS(0.019)PT(0.366)S(0.624)PGS(0.004)LR	_SGKS(ph)PS(ph)PSPTS(ph)PGSLR_	2	891.349	332
Q8BTI8	Serine/arginine repetitive matrix protein 2	Srrm2	0.987555	2	S	1.29965e-11	S(0.006)S(0.007)S(0.988)PVT(0.001)ELT(0.5)ARS(0.498)PVKQDK	_SSS(ph)PVTELT(ph)ARSPVKQDK_	3	697.324	1068
E9Q8N8	Electrogenic sodium bicarbonate cotransporter 1	Slc4a4	0.987492	1	S	1.99737e-28	NLTSS(0.012)S(0.987)LNDISDKPEK	_NLTSSS(ph)LNDISDKPEK_	2	914.422	257
S4R221	Rho GTPase-activating protein 12	Arhgap12	0.987289	1	S	0.00924334	VLSSTINNQVAEADEAAEEET(0.013)PDS(0.987)PGVEK	_VLSSTINNQVAEADEAAEEETPDS(ph)PGVEK_	3	1037.13	589
Q6NZR5		Skiv2l	0.987097	1	S	0.00142944	AS(0.013)S(0.987)LEDLVLK	_ASS(ph)LEDLVLK_	2	577.789	253
Q6ZWR6	Nesprin-1	Syne1	0.986903	1	S	0.0139483	T(0.013)LPS(0.987)EDEEGEEDKEFYLR	_TLPS(ph)EDEEGEEDKEFYLR_	3	755.986	8308
Q8BTI8	Serine/arginine repetitive matrix protein 2	Srrm2	0.986861	2	S	1.29965e-11	S(0.134)S(0.134)S(0.731)PVTELT(0.013)ARS(0.987)PVKQDK	_SSS(ph)PVTELTARS(ph)PVKQDK_	2	1045.48	1077
O55003	BCL2/adenovirus E1B 19 kDa protein-interacting protein 3	Bnip3	0.986512	1	S	0.00192262	AEIDS(0.013)HS(0.987)FGEK	_AEIDSHS(ph)FGEK_	2	650.266	79
A2AJI0	MAP7 domain-containing protein 1	Map7d1	0.986455	3	S	0.0184019	AAEEKEPAAPAS(0.999)PAPS(0.986)PVPS(0.507)PT(0.507)PAQPQK	_AAEEKEPAAPAS(ph)PAPS(ph)PVPS(ph)PTPAQPQK_	3	997.438	548
Q02248	Catenin beta-1	Ctnnb1	0.986235	1	S	6.1396e-11	RT(0.014)S(0.986)MGGTQQQFVEGVR	_RTS(ph)MGGTQQQFVEGVR_	2	930.925	552
O70318	Band 4.1-like protein 2	Epb41l2	0.986129	1	S	0.000301309	EPT(0.007)QADVEDQILGKEES(0.986)LPEEES(0.007)R	_EPTQADVEDQILGKEES(ph)LPEEESR_	3	936.753	116
O35954	Membrane-associated phosphatidylinositol transfer protein 1	Pitpnm1	0.985791	1;2	S	1.26713e-11	SSTEARPGTSTAGTPDGPEAPPGPDAS(0.986)PDAS(0.014)FGK	_SSTEARPGTSTAGTPDGPEAPPGPDAS(ph)PDASFGK_	3	1098.15	300
Q8K400	Syntaxin-binding protein 5	Stxbp5	0.985784	1	S	0.000652253	KLS(0.986)LPT(0.014)DLKPDLDVK	_KLS(ph)LPTDLKPDLDVK_	2	881.474	760
P31750	RAC-alpha serine/threonine-protein kinase	Akt1	0.985701	1	S	3.41534e-45	S(0.002)GS(0.986)PS(0.013)DNSGAEEMEVSLAKPK	_SGS(ph)PSDNSGAEEMEVSLAKPK_	2	1100.48	124
Q9CQV4	Protein FAM134C	Fam134c	0.985572	1	S	2.41452e-26	GQTPLTEGSEDLDGHS(0.986)DPEES(0.014)FAR	_GQTPLTEGSEDLDGHS(ph)DPEESFAR_	3	885.368	320
P20357	Microtubule-associated protein 2	Map2	0.985513	1;3	S	2.08697e-26	ARVDHGAEIITQS(0.986)PS(0.014)R	_ARVDHGAEIITQS(ph)PSR_	2	908.939	1783
O88703	Potassium/sodium hyperpolarization-activated cyclic nucleotide-gated channel 2	Hcn2	0.985442	1	S	5.44108e-12	DS(0.015)AS(0.985)PGAASGLDPLDSAR	_DSAS(ph)PGAASGLDPLDSAR_	2	883.883	842
Q640R3	Hepatocyte cell adhesion molecule	Hepacam	0.985344	1;2	S	9.71959e-05	T(0.001)HT(0.013)S(0.985)PPRAPS(0.543)S(0.457)PGR	_THTS(ph)PPRAPS(ph)SPGR_	2	804.34	379
Q9JLM8	Serine/threonine-protein kinase DCLK1	Dclk1	0.985181	1	S	7.66694e-18	AQPAPPELNSESEDYS(0.985)PS(0.013)S(0.002)SETVR	_AQPAPPELNSESEDYS(ph)PSSSETVR_	3	886.38	742
A2AGQ4	MAP kinase-activating death domain protein	Madd	0.984665	1	S	3.66248e-18	KRS(0.985)PT(0.015)ENVNTPVGK	_KRS(ph)PTENVNTPVGK_	2	803.901	1058
Q6NZR5		Skiv2l	0.984664	2	S	0.00175643	GDNAS(1)PS(0.985)PS(0.014)GT(0.001)PLVR	_GDNAS(ph)PS(ph)PSGTPLVR_	2	807.832	242
Q8BTI8	Serine/arginine repetitive matrix protein 2	Srrm2	0.984477	3	S	3.94766e-05	HAS(1)S(0.999)S(0.984)PES(0.017)LKPTPAPGSR	_HAS(ph)S(ph)S(ph)PESLKPTPAPGSR_	2	1023.41	435
A2ARP8	Microtubule-associated protein 1A	Mtap1a	0.984378	1;2	S	1.75271e-47	TEATQGLDYVPSAGT(0.001)IS(0.984)PT(0.012)S(0.002)SLEEDK	_TEATQGLDYVPSAGTIS(ph)PTSSLEEDK_	2	1388.63	1133
E9Q3M9		2010300C02Rik	0.984373	1	T	1.37218e-10	DTSLPKGDT(0.984)PPPET(0.015)IT(0.001)DTNLETPSDTER	_DTSLPKGDT(ph)PPPETITDTNLETPSDTER_	3	1036.47	660
S4R291	Ankyrin-2	Ank2	0.984308	1	S	9.55495e-13	TERHS(0.984)PVFS(0.016)GKPEK	_TERHS(ph)PVFSGKPEK_	2	839.901	1828
Q9WUD1	STIP1 homology and U box-containing protein 1	Stub1	0.984058	1;2	S	1.40963e-42	LGT(0.016)GGGGS(0.984)PDKSPSAQELK	_LGTGGGGS(ph)PDKSPSAQELK_	2	933.436	20
Q9R0P9	Ubiquitin carboxyl-terminal hydrolase isozyme L1	Uchl1	0.983923	1	S	2.15801e-18	QFLSET(0.016)EKLS(0.984)PEDR	_QFLSETEKLS(ph)PEDR_	2	879.901	125
Q9QYB8	Beta-adducin	Add2	0.983797	2;3	S	4.36128e-25	DKTESVTS(0.001)GPLS(0.999)PEGS(0.984)PS(0.037)KS(0.86)PS(0.119)K	_DKTESVTSGPLS(ph)PEGS(ph)PSKS(ph)PSK_	3	848.018	696
Q3UHK1	Proton myo-inositol cotransporter	Slc2a13	0.983651	1	S	8.6379e-10	VKGS(0.016)NYHLS(0.984)DNDASDVE	_VKGSNYHLS(ph)DNDASDVE_	2	965.397	629
Q8K019	Bcl-2-associated transcription factor 1	Bclaf1	0.983525	2	S	0.00513562	Y(0.156)S(0.843)PS(0.007)QNS(0.984)PIHHIPS(0.011)RR	_YS(ph)PSQNS(ph)PIHHIPSRR_	3	679.301	289
B1APX2	Uncharacterized protein KIAA0930 homolog	5031439G07Rik	0.98342	1	S	0.00104398	S(0.011)HS(0.983)ANDS(0.005)EEFFREDDSGADLHNATNLR	_SHS(ph)ANDSEEFFREDDSGADLHNATNLR_	4	779.326	367
Q61937	Nucleophosmin	Npm1	0.983338	2	S	0.0001775	LKCGS(0.017)GPVHIS(0.983)GQHLVAVEEDAES(1)EDEDEEDVK	_LKCGSGPVHIS(ph)GQHLVAVEEDAES(ph)EDEDEEDVK_	3	1237.52	112
B2RUJ5	Amyloid beta A4 precursor protein-binding family A member 1	Apba1	0.983211	1	S	3.49573e-72	SAS(0.983)T(0.017)ESGFHNHTDTAEGDVLAAAR	_SAS(ph)TESGFHNHTDTAEGDVLAAAR_	3	842.029	84
A6ZI44	Fructose-bisphosphate aldolase	Aldoa	0.983152	1	S	9.48121e-37	GILAADEST(0.017)GS(0.983)IAKR	_GILAADESTGS(ph)IAKR_	2	784.888	93
Q0VAW6	Uncharacterized protein C18orf25 homolog	8030462N17Rik	0.982457	1	S	5.48394e-12	RDS(0.982)S(0.017)ESQLASTESDKPTTGR	_RDS(ph)SESQLASTESDKPTTGR_	3	744.664	66
D3Z3G6	Mitogen-activated protein kinase 3	Mapk3	0.982268	1	Y	6.02366e-17	IADPEHDHTGFLT(0.016)EY(0.982)VAT(0.002)R	_IADPEHDHTGFLTEY(ph)VATR_	3	751.339	205
Q3TIR3	Synembryn-A	Ric8a	0.982199	2	T	1.54312e-08	GLMAGGRPEGQYS(1)EDEDT(0.982)DT(0.018)EEYR	_GLMAGGRPEGQYS(ph)EDEDT(ph)DTEEYR_	3	955.691	440
S4R291	Ankyrin-2	Ank2	0.98214	1	S	0.0323466	HLPVS(0.982)PGKT(0.018)EK	_HLPVS(ph)PGKTEK_	2	636.821	1925
P20357	Microtubule-associated protein 2	Map2	0.981856	1	T	1.71176e-45	SGTSTPTTPGSTAIT(0.018)PGT(0.982)PPSYSSR	_SGTSTPTTPGSTAITPGT(ph)PPSYSSR_	2	1244.57	1609
A2A5Y6	Microtubule-associated protein	Mapt	0.981826	2	S	3.99332e-14	SGYS(0.982)S(0.018)PGS(1)PGTPGSR	_SGYS(ph)SPGS(ph)PGTPGSR_	2	777.287	506
Q9DBC7	cAMP-dependent protein kinase type I-alpha regulatory subunit	Prkar1a	0.981717	1;2	S	6.10816e-08	T(0.012)DS(0.982)REDEIS(0.007)PPPPNPVVK	_TDS(ph)REDEISPPPPNPVVK_	2	1028.98	77
B9EI38	RalBP1-associated Eps domain-containing protein 2	Reps2	0.981633	1	S	1.04195e-25	S(0.018)FS(0.982)VEREPQENNSNYPDEPWR	_SFS(ph)VEREPQENNSNYPDEPWR_	3	887.373	246
Q9QYB8	Beta-adducin	Add2	0.981495	4	S	2.65856e-05	DIAT(0.144)EKPGS(0.843)PVKS(0.35)T(0.681)PAS(0.981)PVQS(0.726)PS(0.274)K	_DIATEKPGS(ph)PVKST(ph)PAS(ph)PVQS(ph)PSK_	3	910.049	602
Q02053	Ubiquitin-like modifier-activating enzyme 1	Uba1	0.98141	1	S	0.0371016	IHVS(0.981)DQELQS(0.013)ANAS(0.005)VDDS(0.001)RLEELK	_IHVS(ph)DQELQSANASVDDSRLEELK_	3	921.766	810
O55003	BCL2/adenovirus E1B 19 kDa protein-interacting protein 3	Bnip3	0.981285	1	S	0.000370189	NST(0.019)LS(0.981)EEDYIER	_NSTLS(ph)EEDYIER_	2	768.317	88
Q8VDU5	SNF-related serine/threonine-protein kinase	Snrk	0.980883	1	S	2.29139e-27	RDS(0.981)S(0.019)EGPPGSEGDGGGQSKPSSGGGVDK	_RDS(ph)SEGPPGSEGDGGGQSKPSSGGGVDK_	3	890.042	569
G5E829		Atp2b1	0.980872	1	S	1.88238e-17	SATSSSPGS(0.981)PLHS(0.019)LETSL	_SATSSSPGS(ph)PLHSLETSL_	2	919.414	1211
Q5DTM8	E3 ubiquitin-protein ligase BRE1A	Rnf20	0.980318	1	S	0.000276796	ALVVPEPEPDS(0.02)DS(0.98)NQER	_ALVVPEPEPDSDS(ph)NQER_	2	981.428	138
E9QAD8	IQ motif and SEC7 domain-containing protein 2	Iqsec2	0.980303	1	S	6.29496e-05	HS(0.02)WDS(0.98)PAFNNDVVQR	_HSWDS(ph)PAFNNDVVQR_	3	617.932	744
Q52KI8	Serine/arginine repetitive matrix protein 1	Srrm1	0.980054	3	S	0.016167	KPPAPPS(0.98)PVQS(0.111)QS(0.773)PS(0.201)T(0.184)NWS(0.751)PAVPAK	_KPPAPPS(ph)PVQSQS(ph)PSTNWS(ph)PAVPAK_	3	932.413	810
Q4KMM3	Oxidation resistance protein 1	Oxr1	0.979953	2	S	1.68756e-14	VVS(0.98)S(0.02)T(0.007)S(0.993)EEEEAFTEK	_VVS(ph)STS(ph)EEEEAFTEK_	2	916.35	201
Q7TSI3	Serine/threonine-protein phosphatase 6 regulatory subunit 1	Ppp6r1	0.979854	3	S	1.10577e-05	NTVDLVNT(0.06)HHLHS(0.98)S(0.98)S(0.98)DDEDDRLK	_NTVDLVNTHHLHS(ph)S(ph)S(ph)DDEDDRLK_	3	963.049	530
Q7TSI3	Serine/threonine-protein phosphatase 6 regulatory subunit 1	Ppp6r1	0.979853	3	S	1.10577e-05	NTVDLVNT(0.06)HHLHS(0.98)S(0.98)S(0.98)DDEDDRLK	_NTVDLVNTHHLHS(ph)S(ph)S(ph)DDEDDRLK_	3	963.049	529
Q7TSI3	Serine/threonine-protein phosphatase 6 regulatory subunit 1	Ppp6r1	0.979853	3	S	1.10577e-05	NTVDLVNT(0.06)HHLHS(0.98)S(0.98)S(0.98)DDEDDRLK	_NTVDLVNTHHLHS(ph)S(ph)S(ph)DDEDDRLK_	3	963.049	531
Q9Z1T6	1-phosphatidylinositol 3-phosphate 5-kinase	Pikfyve	0.979813	1	S	7.43708e-11	ATDDKS(0.017)S(0.98)PT(0.003)LDSANDLPR	_(ac)ATDDKSS(ph)PTLDSANDLPR_	2	1012.94	8
Q6GUQ1	Epidermal growth factor-like protein 8	Egfl8	0.979518	1	T	0.0189515	KPHPGALT(0.98)CDAICS(0.02)K	_KPHPGALT(ph)CDAICSK_	2	810.867	109
Q9Z1R2	Large proline-rich protein BAG6	Bag6	0.979269	1	S	0.00175486	PLT(0.02)S(0.979)PESLS(0.001)R	_PLTS(ph)PESLSR_	2	583.776	1103
P97445	Voltage-dependent P/Q-type calcium channel subunit alpha-1A	Cacna1a	0.979025	1	S	6.86465e-08	EMGTDGYS(0.979)DS(0.021)EHYLPMEGQTR	_EMGTDGYS(ph)DSEHYLPMEGQTR_	3	828.322	2028
P11798	Calcium/calmodulin-dependent protein kinase type II subunit alpha	Camk2a	0.97895	1;2;3;4	S	3.03417e-137	NDGVKES(0.979)S(0.019)ES(0.001)T(0.001)NTTIEDEDTKVR	_NDGVKES(ph)SESTNTTIEDEDTKVR_	3	878.719	330
P06837	Neuromodulin	Gap43	0.978946	1	S	4.74297e-25	KGEGDAAPSEEKAGS(0.979)AET(0.021)ESAAK	_KGEGDAAPSEEKAGS(ph)AETESAAK_	3	767.336	128
Q9QXW9	Large neutral amino acids transporter small subunit 2	Slc7a8	0.97887	1;2	S	2.18783e-45	NHPGSDT(0.021)S(0.979)PEAEASSGGGGVALK	_NHPGSDTS(ph)PEAEASSGGGGVALK_	2	1102.98	21
A2ARP8	Microtubule-associated protein 1A	Mtap1a	0.978819	1	S	3.65209e-07	STPSQVTS(0.002)EEKDGHS(0.979)PMS(0.019)K	_STPSQVTSEEKDGHS(ph)PMSK_	3	704.637	2875
O70318	Band 4.1-like protein 2	Epb41l2	0.978521	1	S	7.75689e-10	AKEVENEQT(0.01)PVS(0.979)EPEEEKGS(0.012)QPGPPVER	_AKEVENEQTPVS(ph)EPEEEKGSQPGPPVER_	3	1052.82	38
Q9Z2H5	Band 4.1-like protein 1	Epb41l1	0.978235	2	S	2.44325e-12	SLPELDRDKS(1)DS(0.978)ET(0.022)EGLVFAQDLK	_SLPELDRDKS(ph)DS(ph)ETEGLVFAQDLK_	3	951.426	650
Q62417	Sorbin and SH3 domain-containing protein 1	Sorbs1	0.978141	2	S	3.6635e-05	GTPSS(0.001)S(0.02)PVS(0.978)PQES(0.997)PKHES(0.003)K	_GTPSSSPVS(ph)PQES(ph)PKHESK_	3	709.299	58
A7YQ68	Prickle-like protein 2	Prickle2	0.978085	1	S	0.00297776	YVT(0.022)S(0.978)DELLHK	_YVTS(ph)DELLHK_	2	642.797	863
Q8BJI1	Sodium-dependent neutral amino acid transporter SLC6A17	Slc6a17	0.977986	1	S	8.44849e-35	EHS(0.978)NEHVT(0.022)ESVADLLALEEPVDYK	_EHS(ph)NEHVTESVADLLALEEPVDYK_	3	935.427	13
B2RRE2	Unconventional myosin-XVIIIa	Myo18a	0.977637	3	S	8.13577e-06	S(0.009)RDES(0.01)AS(0.05)ET(0.505)S(0.55)T(0.879)PS(0.978)EHS(0.019)AAPSPQVEVR	_SRDESASETS(ph)T(ph)PS(ph)EHSAAPSPQVEVR_	3	994.391	157
P36916	Guanine nucleotide-binding protein-like 1	Gnl1	0.977081	1;2	S	5.40011e-29	EEQTDT(0.023)S(0.977)DGESVTHHIR	_EEQTDTS(ph)DGESVTHHIR_	3	674.28	51
Q80U49	Protein KIAA0284	Kiaa0284	0.976988	1	S	1.26894e-11	GHKHEDGTQS(0.977)DS(0.023)EDPLAK	_GHKHEDGTQS(ph)DSEDPLAK_	3	677.62	360
Q58A65	C-Jun-amino-terminal kinase-interacting protein 4	Spag9	0.976924	2	S	4.20143e-07	S(0.013)AS(0.977)QS(0.032)S(0.978)LDKLDQELK	_SAS(ph)QSS(ph)LDKLDQELK_	2	904.889	730
G3X9V4	Glutamate [NMDA] receptor subunit epsilon-2	Grin2b	0.976615	1	S	0.000149677	QS(0.001)VMNS(0.977)PT(0.022)AT(0.001)MNNTHSNILR	_QSVMNS(ph)PTATMNNTHSNILR_	3	766.012	886
Q9WVQ1	Membrane-associated guanylate kinase, WW and PDZ domain-containing protein 2	Magi2	0.976443	1	S	1.70384e-24	IIPQEELNS(0.976)PT(0.02)S(0.004)APSSEK	_IIPQEELNS(ph)PTSAPSSEK_	2	1003.97	1013
Q3UVT7	Palmdelphin	Palmd	0.976234	1	S	6.43105e-05	MELSPS(0.024)RAS(0.976)PGK	_MELSPSRAS(ph)PGK_	2	670.307	375
A2ARP8	Microtubule-associated protein 1A	Mtap1a	0.976191	2	S	1.34438e-25	MAS(1)PPPSGPPS(0.001)AAHT(0.023)PFHQS(0.976)PVEEK	_M(ox)AS(ph)PPPSGPPSAAHTPFHQS(ph)PVEEK_	3	920.391	1246
Q9QYX7	Protein piccolo	Pclo	0.975949	1	S	2.31705e-05	KTTLYFDEEPELEMES(0.001)LT(0.023)DS(0.976)PEDR	_KTTLYFDEEPELEMESLTDS(ph)PEDR_	3	985.423	1642
Q62417	Sorbin and SH3 domain-containing protein 1	Sorbs1	0.975818	1	S	6.34116e-05	S(0.024)KS(0.976)EMNYIEGEK	_SKS(ph)EMNYIEGEK_	2	747.813	270
A2A4P4	Alanyl-tRNA editing protein Aarsd1	Aarsd1	0.975711	1	S	0.0108007	GAQADHFT(0.004)ES(0.013)PLS(0.976)PGS(0.007)QVQVR	_GAQADHFTESPLS(ph)PGSQVQVR_	3	764.353	219
G5E884		Pak1	0.975625	2	T	0.00905664	T(0.001)VS(0.002)ET(0.002)PAVPPVS(0.995)EDEDDDDDAT(0.976)PPPVIAPRPEHT(0.025)K	_TVSETPAVPPVS(ph)EDEDDDDDAT(ph)PPPVIAPRPEHTK_	4	971.676	184
Q9DCB4	R3H domain-containing protein 2	R3hdm1	0.974613	1	S	3.47702e-05	S(0.025)KS(0.975)IEEREEEYQR	_SKS(ph)IEEREEEYQR_	3	588.26	278
P48678	Prelamin-A/C	Lmna	0.974293	2	S	0.00140796	LRLS(0.998)PS(0.974)PT(0.023)S(0.004)QR	_LRLS(ph)PS(ph)PTSQR_	2	701.318	392
Q99P72	Reticulon-4	Rtn4	0.974235	1	S	1.95315e-05	LS(0.026)AS(0.974)PQEVGKPYLESFQPNLHITK	_LSAS(ph)PQEVGKPYLESFQPNLHITK_	3	921.797	768
J3QNU6	Beta-arrestin-1	Arrb1	0.974093	1	S	1.54467e-44	GMKDDKDEEDDGT(0.026)GS(0.974)PHLNNR	_GM(ox)KDDKDEEDDGTGS(ph)PHLNNR_	3	809.324	413
B1AZP2	Disks large-associated protein 4	Dlgap4	0.974042	1	S	8.24075e-05	S(0.974)LDRLDS(0.026)VDMLLPSK	_S(ph)LDRLDSVDMLLPSK_	2	884.931	415
P14873	Microtubule-associated protein 1B	Map1b	0.973653	2;3	S	2.64418e-07	KIAELEEERS(0.999)QGS(0.974)T(0.019)S(0.009)NS(0.999)DWMK	_KIAELEEERS(ph)QGS(ph)TSNS(ph)DWMK_	3	889.015	339
Q8R1Q8	Cytoplasmic dynein 1 light intermediate chain 1	Dync1li1	0.973488	1;2;3	S	2.87447e-18	KPASVSPTTPT(0.022)S(0.973)PT(0.004)EGEAS	_KPASVSPTTPTS(ph)PTEGEAS_	2	962.433	516
P97492	Regulator of G-protein signaling 14	Rgs14	0.97321	1	S	0.000322922	PLREPGS(0.009)S(0.009)HLGS(0.973)PDT(0.009)AR	_PLREPGSSHLGS(ph)PDTAR_	2	928.936	203
E9PVY8	Microtubule-actin cross-linking factor 1	Macf1	0.972963	1	S	0.0114068	RQGS(0.973)FS(0.027)EDVISHK	_RQGS(ph)FSEDVISHK_	3	523.907	3887
A2AH25	Rho GTPase-activating protein 1	Arhgap1	0.972912	2;3	S	1.73355e-21	SDDS(0.998)KS(0.029)S(0.973)S(0.999)PEPVTHLK	_SDDS(ph)KSS(ph)S(ph)PEPVTHLK_	2	977.368	90
G5E884	Serine/threonine-protein kinase PAK 1	Pak1	0.972485	1	S	0.0242825	YMS(0.972)FT(0.028)DK	_YMS(ph)FTDK_	2	486.183	144
Q9ERZ4	Muscarinic acetylcholine receptor M2	Chrm2	0.971986	1	S	0.000147224	EKKEPVANQDPVS(0.972)PS(0.028)LVQGR	_EKKEPVANQDPVS(ph)PSLVQGR_	3	753.377	232
Q9QYX7	Protein piccolo	Pclo	0.971276	1	S	5.67883e-05	LDLNMLS(0.971)DS(0.029)ENPQHLELHEPPK	_LDLNMLS(ph)DSENPQHLELHEPPK_	3	879.407	4522
A2ARP8	Microtubule-associated protein 1A	Mtap1a	0.971227	2;3	S	1.24646e-27	TEATQGLDYVPS(0.209)AGT(0.332)IS(0.456)PT(0.006)S(0.026)S(0.971)LEEDKGFK	_TEATQGLDYVPSAGTIS(ph)PTSS(ph)LEEDKGFK_	4	797.854	1137
A6MDD2	Receptor-type tyrosine-protein phosphatase-like N	Ptprn	0.970863	1	S	1.81558e-75	AEDS(0.971)S(0.029)EGHEEEVLGGR	_AEDS(ph)SEGHEEEVLGGR_	2	890.855	309
A2ARP8	Microtubule-associated protein 1A	Mtap1a	0.970799	1	S	8.92612e-05	SPFEIIS(0.027)PPAS(0.971)PPEMT(0.002)GQR	_SPFEIISPPAS(ph)PPEMTGQR_	3	707.662	2010
Q60790	Ras GTPase-activating protein 3	Rasa3	0.970652	1	S	0.0254019	QQS(0.002)EIS(0.003)T(0.025)HS(0.971)I	_QQSEISTHS(ph)I_	2	605.261	833
Q68FD9	UPF0606 protein KIAA1549	Kiaa1549	0.970542	2	S	0.0294673	LIT(0.055)T(0.957)DS(0.971)DGT(0.016)Y(0.001)K	_LITT(ph)DS(ph)DGTYK_	2	687.267	1613
Q69ZK9	Neuroligin-2	Nlgn2	0.970413	1	S	3.55149e-05	RLS(0.97)PPGGS(0.028)GS(0.002)GVPGGGPLLPTAGR	_RLS(ph)PPGGSGSGVPGGGPLLPTAGR_	3	742.046	714
Q60902	Epidermal growth factor receptor substrate 15-like 1	Eps15l1	0.970313	1	S	0.010555	TVFAGAVPVLPAS(0.97)PPPKDS(0.029)LR	_TVFAGAVPVLPAS(ph)PPPKDSLR_	3	733.724	229
K3W4S4	C-Jun-amino-terminal kinase-interacting protein 3	Mapk8ip3	0.97024	1	S	8.15427e-10	ANKT(0.015)S(0.97)PT(0.012)S(0.003)GEGTRPGGIIHVYGDDSSDK	_ANKTS(ph)PTSGEGTRPGGIIHVYGDDSSDK_	3	976.112	1200
B9EJ86	Oxysterol-binding protein	Osbpl8	0.970163	3	S	1.07025e-06	GYSSPEPDIQDS(0.967)S(0.97)GS(0.882)EAQS(0.174)VKPS(0.004)T(0.003)R	_GYSSPEPDIQDS(ph)S(ph)GS(ph)EAQSVKPSTR_	3	950.37	808
Q9Z2H5	Band 4.1-like protein 1	Epb41l1	0.970056	1;2	S	6.09813e-35	S(1)LDGAEFS(0.011)RPAS(0.97)VS(0.018)ENHDAGPEGDKR	_S(ph)LDGAEFSRPAS(ph)VSENHDAGPEGDKR_	3	963.401	441
I7HJQ9	Myotubularin-related protein 1	Mtmr1	0.969983	1	S	2.99309e-10	GS(0.017)S(0.97)PT(0.013)HSATPVHTSV	_GSS(ph)PTHSATPVHTSV_	2	772.841	659
Q9JJV4	Voltage-dependent calcium channel gamma-4 subunit	Cacng4	0.969967	2	S	8.0947e-07	S(0.015)T(0.015)EAS(0.97)PS(0.001)RDAS(1)PVGLK	_STEAS(ph)PSRDAS(ph)PVGLK_	2	881.376	253
Q9QYX7	Protein piccolo	Pclo	0.969927	1	S	4.75415e-17	LPTAVSLYS(0.97)PT(0.03)DEQSVMQK	_LPTAVSLYS(ph)PTDEQSVMQK_	2	1087.51	1829
Q8K3X4	Interferon regulatory factor 2-binding protein-like	Irf2bpl	0.96987	3	S	0.00214965	RNS(0.791)S(0.406)S(0.805)PVS(0.97)PAS(0.028)VPGQR	_RNS(ph)SS(ph)PVS(ph)PASVPGQR_	2	933.371	641
B1AQX7	SRC kinase signaling inhibitor 1	Srcin1	0.969811	2	S	8.86116e-39	KDS(0.97)GS(0.03)SSVFAES(1)PGGK	_KDS(ph)GSSSVFAES(ph)PGGK_	2	850.334	547
Q8BPN8	DmX-like protein 2	Dmxl2	0.969675	1	S	2.67315e-06	LDHELS(0.97)LDRES(0.03)EAGTGSSEHEDGER	_LDHELS(ph)LDRESEAGTGSSEHEDGER_	3	945.728	451
Q6NS60	F-box only protein 41	Fbxo41	0.969384	1	S	9.14777e-16	RHS(0.969)T(0.031)EGEEGDVSDVGSR	_RHS(ph)TEGEEGDVSDVGSR_	2	948.89	476
A2AMI2	Eukaryotic translation initiation factor 4 gamma 3	Eif4g3	0.969018	1	S	0.000811928	T(0.015)S(0.015)S(0.969)PTSLPPLAR	_TSS(ph)PTSLPPLAR_	2	653.824	267
Q5XG69	Protein FAM169A	Fam169a	0.968963	1	S	4.63195e-17	HFQDSEFSS(0.031)S(0.969)QGEDENVAK	_HFQDSEFSSS(ph)QGEDENVAK_	2	1110.94	348
Q9QYB5	Gamma-adducin	Add3	0.968739	1;2	S	3.67613e-38	TEEVLS(0.737)PDGS(0.262)PS(0.032)KS(0.969)PS(0.001)K	_TEEVLS(ph)PDGSPSKS(ph)PSK_	2	952.9	681
Q8VHI6	Wiskott-Aldrich syndrome protein family member 3	Wasf3	0.968635	1	S	9.84817e-12	LSQSVHHGASSEGS(0.012)LS(0.969)PDT(0.02)R	_LSQSVHHGASSEGSLS(ph)PDTR_	3	711.318	235
Q8K0T0	Reticulon-1	Rtn1	0.968002	1	S	4.0752e-08	GS(0.032)VS(0.968)EDELIAAIK	_GSVS(ph)EDELIAAIK_	2	706.339	352
Q80U49	Protein KIAA0284	Kiaa0284	0.967823	1	S	3.00377e-17	EIHDVAGDGDSLGS(0.968)PGPT(0.032)R	_EIHDVAGDGDSLGS(ph)PGPTR_	3	653.953	1341
B9EJ86	Oxysterol-binding protein	Osbpl8	0.966669	3	S	1.07025e-06	GYSSPEPDIQDS(0.967)S(0.97)GS(0.882)EAQS(0.174)VKPS(0.004)T(0.003)R	_GYSSPEPDIQDS(ph)S(ph)GS(ph)EAQSVKPSTR_	3	950.37	807
Q9EPN1	Neurobeachin	Nbea	0.966645	1;2	S	3.4807e-19	AVPNVDAGSIIS(0.001)DT(0.032)ERS(0.967)DDGKES(0.001)GK	_AVPNVDAGSIISDTERS(ph)DDGKESGK_	3	876.399	1257
Q6P5B5	Fragile X mental retardation syndrome-related protein 2	Fxr2	0.966297	2	S	0.00530205	T(0.034)DGS(0.966)IS(0.997)GDRQPVT(0.003)VADYISR	_TDGS(ph)IS(ph)GDRQPVTVADYISR_	3	766.333	603
Q9QYC0	Alpha-adducin	Add1	0.966142	1	S	2.3226e-06	AAVVT(0.034)S(0.966)PPPTTAPHK	_AAVVTS(ph)PPPTTAPHK_	2	777.39	12
Q80X80	C2 domain-containing protein 2-like	C2cd2l	0.965689	1	S	4.36575e-18	SDIS(0.034)ERPS(0.966)VDDVESETGSTGALETR	_SDISERPS(ph)VDDVESETGSTGALETR_	3	906.398	613
Q5DQR4	Syntaxin-binding protein 5-like	Stxbp5l	0.965605	1;2	S	1.51e-48	SLSGSTNTVS(0.996)S(0.966)EGVT(0.038)K	_SLSGSTNTVS(ph)S(ph)EGVTK_	2	857.353	598
Q9WTQ5	A-kinase anchor protein 12	Akap12	0.965512	1	S	2.93092e-100	GPSEAPQEAEAEEGAT(0.034)S(0.966)DGEK	_GPSEAPQEAEAEEGATS(ph)DGEK_	2	1084.93	584
P14873	Microtubule-associated protein 1B	Map1b	0.965335	1	S	1.37674e-45	DVMSDETNNEET(0.005)ES(0.965)PS(0.03)QEFVNITK	_DVMSDETNNEETES(ph)PSQEFVNITK_	2	1412.08	1151
Q9WTQ5	A-kinase anchor protein 12	Akap12	0.965162	2	S	1.66691e-25	EKEPTKPLES(0.997)PT(0.038)S(0.965)PVSNETTSSFK	_EKEPTKPLES(ph)PTS(ph)PVSNETTSSFK_	3	927.415	273
D3Z5K8	SH3 and multiple ankyrin repeat domains protein 2	Shank2	0.965007	1;2	S	1.61386e-08	RAPS(1)PVVS(0.965)PT(0.035)ELSK	_RAPS(ph)PVVS(ph)PTELSK_	2	814.378	1703
Q9CQJ6	Density-regulated protein	Denr	0.964347	1	S	2.10402e-26	LT(0.035)VENS(0.964)PKQETGITEGQGPVGEEEEK	_LTVENS(ph)PKQETGITEGQGPVGEEEEK_	3	955.773	73
P31648	Sodium- and chloride-dependent GABA transporter 1	Slc6a1	0.964096	1	S	1.28732e-34	VADGQIS(0.964)T(0.036)EVSEAPVASDKPK	_VADGQIS(ph)TEVSEAPVASDKPK_	2	1104.53	14
Q8K0U4	Heat shock 70 kDa protein 12A	Hspa12a	0.963831	1	S	0.000174518	LDLT(0.034)GS(0.964)GGT(0.003)AVPAR	_LDLTGS(ph)GGTAVPAR_	2	697.837	631
Q3B7Z2	Oxysterol-binding protein 1	Osbp	0.963602	1	S	9.65512e-16	S(0.036)LS(0.964)ELESLKLPAESNEK	_SLS(ph)ELESLKLPAESNEK_	2	977.474	238
Q62318	Transcription intermediary factor 1-beta	Trim28	0.963533	1;2	S	1.90488e-17	AASAAATAAASAATAASAAS(0.004)GS(0.964)PGS(0.03)GEGS(0.002)AGGEK	_(ac)AASAAATAAASAATAASAASGS(ph)PGSGEGSAGGEK_	3	948.416	23
Q9DD18	D-tyrosyl-tRNA(Tyr) deacylase 1	Dtd1	0.963442	2	S	9.96085e-07	S(0.167)AS(0.87)S(0.963)GAEGDVSSEREP	_SAS(ph)S(ph)GAEGDVSSEREP_	2	862.806	197
F8WHW6	Phosphatidylinositol 4-phosphate 5-kinase type-1 gamma	Pip5k1c	0.963401	1	S	1.36625e-57	TQS(0.963)S(0.037)GQDGRPQEEPHAEDLQK	_TQS(ph)SGQDGRPQEEPHAEDLQK_	3	806.35	554
Q05D44	Eukaryotic translation initiation factor 5B	Eif5b	0.963303	1	S	3.26813e-08	KTARPNSEAPLS(0.963)GS(0.037)EDADDSNK	_KTARPNSEAPLS(ph)GSEDADDSNK_	3	790.347	137
P98191	Phosphatidate cytidylyltransferase 1	Cds1	0.963051	1;2	S	1.63756e-72	EGEAAGGDHET(0.262)ES(0.733)T(0.041)S(0.963)DKET(0.001)DIDDR	_EGEAAGGDHETES(ph)TS(ph)DKETDIDDR_	3	908.666	37
P97379	Ras GTPase-activating protein-binding protein 2	G3bp2	0.962998	1	T	1.10975e-16	S(0.037)AT(0.963)PPPAEPASLPQEPPK	_SAT(ph)PPPAEPASLPQEPPK_	2	947.453	227
Q9Z0P4	Paralemmin-1	Palm	0.962936	1;2	S	8.90628e-34	EENQTGPTT(0.008)T(0.992)PS(0.963)DT(0.037)QDLDMK	_EENQTGPTTT(ph)PS(ph)DTQDLDMK_	2	1184.45	365
Q80X80	C2 domain-containing protein 2-like	C2cd2l	0.962933	1	S	1.70525e-11	EAGLS(0.963)QS(0.037)HDDLSNTTATPSVR	_EAGLS(ph)QSHDDLSNTTATPSVR_	3	756.004	660
Z4YJR7		Sorbs2	0.962382	2	S	2.8065e-11	KPLSVS(0.074)PS(0.033)T(0.016)DGLRS(0.914)PS(0.962)PPPR	_KPLSVSPSTDGLRS(ph)PS(ph)PPPR_	3	745.691	139
O70439	Syntaxin-7	Stx7	0.962119	1	T	4.99025e-12	EFGSLPT(0.008)T(0.962)PS(0.03)EQR	_EFGSLPTT(ph)PSEQR_	2	764.838	79
Q9QYC0	Alpha-adducin	Add1	0.962014	1	S	1.29596e-07	WLHSGRGDDASEEGQNGS(0.038)S(0.962)PK	_WLHSGRGDDASEEGQNGSS(ph)PK_	3	765.321	465
Q9QYX7	Protein piccolo	Pclo	0.961341	1	S	0.000179402	S(0.039)MS(0.961)DPKPLSPTADESSR	_SMS(ph)DPKPLSPTADESSR_	3	628.94	3610
S4R291	Ankyrin-2	Ank2	0.96102	1	S	2.20588e-41	ES(0.039)ES(0.961)DQEPEEEIGMTSEK	_ESES(ph)DQEPEEEIGMTSEK_	2	1067.41	1428
S4R2H6			0.96102	1	S	2.20588e-41	ES(0.039)ES(0.961)DQEPEEEIGMTSEK	_ESES(ph)DQEPEEEIGMTSEK_	2	1067.41	1452
Q61074	Protein phosphatase 1G	Ppm1g	0.960758	1	S	2.58742e-07	KLEEALS(0.961)T(0.039)EGAEDTGNSDK	_KLEEALS(ph)TEGAEDTGNSDK_	2	1037.45	524
Q9R1V6	Disintegrin and metalloproteinase domain-containing protein 22	Adam22	0.960646	2;3	S	3.63641e-06	S(0.118)NS(0.581)T(0.289)ET(0.012)LS(0.009)PAKS(0.961)PS(0.092)S(0.551)S(0.288)T(0.089)GS(0.009)IASSR	_SNS(ph)TETLSPAKS(ph)PSS(ph)STGSIASSR_	3	860.349	864
F2Z3U3		Raph1	0.960631	1	T	7.1514e-22	SLPAS(0.001)GT(0.961)PQS(0.039)PPAVK	_SLPASGT(ph)PQSPPAVK_	2	758.874	896
B1AQD9	Protein unc-119 homolog A	Unc119	0.960615	2	S	1.44984e-06	SAEPTREPGAEAES(0.961)GS(0.961)ES(0.079)EPEPGPGPR	_SAEPTREPGAEAES(ph)GS(ph)ESEPEPGPGPR_	3	956.385	39
B1AQD9	Protein unc-119 homolog A	Unc119	0.960524	2	S	1.44984e-06	SAEPTREPGAEAES(0.961)GS(0.961)ES(0.079)EPEPGPGPR	_SAEPTREPGAEAES(ph)GS(ph)ESEPEPGPGPR_	3	956.385	37
Q99NE5	Regulating synaptic membrane exocytosis protein 1	Rims1	0.959447	1	S	3.05504e-11	ET(0.04)S(0.959)PISSHPVTWQPSK	_ETS(ph)PISSHPVTWQPSK_	2	930.93	413
Q8BP27	Swi5-dependent recombination DNA repair protein 1 homolog	Sfr1	0.959088	2	S	1.42918e-15	ENPPS(0.114)PPT(0.927)S(0.959)PAAPQPR	_ENPPSPPT(ph)S(ph)PAAPQPR_	3	601.589	71
Q3UL36	Arginine and glutamate-rich protein 1	Arglu1	0.95877	1	S	0.0121522	AS(0.041)S(0.959)PPDRIDIFGR	_ASS(ph)PPDRIDIFGR_	2	755.856	75
A2AAE1	Uncharacterized protein KIAA1109	Kiaa1109	0.95857	1	S	9.05364e-19	VVFENEQDNNS(0.959)LT(0.041)K	_VVFENEQDNNS(ph)LTK_	2	858.877	2755
Q99L43	Phosphatidate cytidylyltransferase 2	Cds2	0.95832	1;2	S	4.99226e-36	EDAPPEDKESESEAKLDGET(0.01)AS(0.958)DS(0.03)ES(0.001)R	_EDAPPEDKESESEAKLDGETAS(ph)DSESR_	3	996.742	32
Q9JIX8	Apoptotic chromatin condensation inducer in the nucleus	Acin1	0.958208	2	S	0.00734735	S(0.045)QS(0.958)PS(0.997)PPPLPEDLEK	_SQS(ph)PS(ph)PPPLPEDLEK_	2	890.876	389
Q8BHE3	Caytaxin	Atcay	0.957309	1	S	1.38413e-11	LGGAVEDS(0.001)S(0.035)S(0.957)PPS(0.005)T(0.001)LNLSGAHR	_LGGAVEDSSS(ph)PPSTLNLSGAHR_	2	1116.52	46
Q68FD9	UPF0606 protein KIAA1549	Kiaa1549	0.957294	2	T	0.0294673	LIT(0.055)T(0.957)DS(0.971)DGT(0.016)Y(0.001)K	_LITT(ph)DS(ph)DGTYK_	2	687.267	1611
Q68FH0	Plakophilin-4	Pkp4	0.95714	3	S	0.000275569	LQHTGPADDGAT(0.464)RS(0.601)PS(0.978)IDS(0.957)IQKDPR	_LQHTGPADDGATRS(ph)PS(ph)IDS(ph)IQKDPR_	3	968.077	514
Q5QNQ6	Oxysterol-binding protein 2	Osbp2	0.956981	2	S	8.44455e-15	T(0.043)QS(0.957)DDS(1)GDDDEEPAAPADNSELHHTLK	_TQS(ph)DDS(ph)GDDDEEPAAPADNSELHHTLK_	3	1018.72	281
E9Q942	UPF0766 protein C6orf228 homolog		0.956548	1;2	S	1.03791e-23	ELVGDTGSQEGDNEQPS(0.957)GS(0.957)ET(0.087)EEDPSASPQK	_ELVGDTGSQEGDNEQPS(ph)GS(ph)ETEEDPSASPQK_	3	1122.1	59
E9Q942	UPF0766 protein C6orf228 homolog		0.956548	2	S	1.03791e-23	ELVGDTGSQEGDNEQPS(0.957)GS(0.957)ET(0.087)EEDPSASPQK	_ELVGDTGSQEGDNEQPS(ph)GS(ph)ETEEDPSASPQK_	3	1122.1	61
A2AHC3	Calmodulin-regulated spectrin-associated protein 1	Camsap1	0.956266	1	S	0.0187359	T(0.044)DVS(0.956)PPSPQMPR	_TDVS(ph)PPSPQMPR_	2	696.305	550
P06837	Neuromodulin	Gap43	0.956228	2	S	1.06993e-09	AAQPPT(0.018)ET(0.253)AES(0.956)S(0.773)QAEEEKDAVDEAKPK	_AAQPPTETAES(ph)S(ph)QAEEEKDAVDEAKPK_	3	1006.1	192
Q5EBP8	Heterogeneous nuclear ribonucleoprotein A1	Hnrnpa1	0.955766	2	S	3.17877e-05	S(0.956)KS(0.048)ES(0.997)PKEPEQLR	_(ac)S(ph)KSES(ph)PKEPEQLR_	2	858.866	2
O54724	Polymerase I and transcript release factor	Ptrf	0.955718	1	S	9.99709e-10	ATEEPSGT(0.044)GS(0.956)DELIK	_ATEEPSGTGS(ph)DELIK_	2	807.351	42
A2AN08	E3 ubiquitin-protein ligase UBR4	Ubr4	0.955681	1	S	0.00475847	TLSDVEDQKELAS(0.956)PVS(0.044)PELR	_TLSDVEDQKELAS(ph)PVSPELR_	3	765.037	178
Q8K382	DENN domain-containing protein 1A	Dennd1a	0.955338	1	S	0.026772	T(0.044)MPS(0.955)PQAETQDPR	_TMPS(ph)PQAETQDPR_	2	769.321	473
Q9CY58	Plasminogen activator inhibitor 1 RNA-binding protein	Serbp1	0.955287	1	S	1.16638e-07	S(0.045)KS(0.955)EEAHAEDSVMDHHFR	_SKS(ph)EEAHAEDSVMDHHFR_	3	731.3	329
P47867	Secretogranin-3	Scg3	0.955222	1	S	3.56861e-07	LFPAPPEKS(0.955)QEET(0.031)DS(0.012)T(0.003)KEEAAK	_LFPAPPEKS(ph)QEETDSTKEEAAK_	3	838.055	365
O08919	Numb-like protein	Numbl	0.954034	1;2	S	9.44842e-13	KAEAAAAPAVAPGPAQPGHVS(0.954)PT(0.102)PAT(0.314)T(0.314)S(0.314)PGEKGEAGT(0.001)PVAAGTTAAAIPR	_KAEAAAAPAVAPGPAQPGHVS(ph)PTPAT(ph)TSPGEKGEAGTPVAAGTTAAAIPR_	4	1179.58	263
P70441	Na(+)/H(+) exchange regulatory cofactor NHE-RF1	Slc9a3r1	0.953858	2	S	2.76148e-05	S(0.005)AS(0.806)S(0.188)DT(0.002)SEELNS(0.954)QDS(0.046)PKR	_SAS(ph)SDTSEELNS(ph)QDSPKR_	3	699.938	294
Q8CI71	Coiled-coil domain-containing protein 132	Ccdc132	0.9534	1;2	S	6.25819e-09	FLEQS(0.011)RS(0.953)PS(0.037)VS(0.995)PS(0.004)K	_FLEQSRS(ph)PSVS(ph)PSK_	2	854.871	494
O35607	Bone morphogenetic protein receptor type-2	Bmpr2	0.953334	1	S	5.53606e-07	S(0.043)VS(0.953)PT(0.004)VNPMSTAMQNER	_SVS(ph)PTVNPMSTAMQNER_	2	964.916	515
Q8BR65	Sin3 histone deacetylase corepressor complex component SDS3	Suds3	0.95317	2	S	1.00972e-11	RPAS(0.953)PS(0.441)S(0.605)PEHLPATPAESPAQR	_RPAS(ph)PSS(ph)PEHLPATPAESPAQR_	3	815.032	234
S4R291	Ankyrin-2	Ank2	0.952988	1	T	5.16164e-17	TQDQQEYYVT(0.047)T(0.953)PGAEVEDPQK	_TQDQQEYYVTT(ph)PGAEVEDPQK_	2	1253.54	3713
P43006	Excitatory amino acid transporter 2	Slc1a2	0.952304	1	S	1.062e-07	MHDSHLS(0.952)S(0.048)DEPK	_MHDSHLS(ph)SDEPK_	2	731.787	24
Q7TQH0	Ataxin-2-like protein	Atxn2l	0.951567	1	S	1.78598e-24	EVDGLLTSDPMGS(0.952)PVS(0.042)S(0.006)K	_EVDGLLTSDPMGS(ph)PVSSK_	2	949.926	597
P14873	Microtubule-associated protein 1B	Map1b	0.951558	3;4	S	1.71688e-05	LS(0.009)PAKS(0.952)PS(0.209)LS(0.829)PS(0.002)PPS(0.999)PIEK	_LSPAKS(ph)PSLS(ph)PSPPS(ph)PIEK_	3	720.321	1251
Q8BTI8	Serine/arginine repetitive matrix protein 2	Srrm2	0.951511	1	S	6.01344e-08	SEQPLSQVLPS(0.048)LS(0.952)PEHK	_SEQPLSQVLPSLS(ph)PEHK_	2	978.477	1216
B7ZBV9	Potassium voltage-gated channel subfamily KQT member 2	Kcnq2	0.951265	1	S	0.0397643	EPEPAPPY(0.005)HS(0.951)PEDS(0.044)R	_EPEPAPPYHS(ph)PEDSR_	3	596.581	673
P11627	Neural cell adhesion molecule L1	L1cam	0.951191	2	S	0.0418478	DET(0.004)FGEY(0.15)RS(0.894)LES(0.951)DNEEK	_DETFGEYRS(ph)LES(ph)DNEEK_	3	736.607	1184
Q9QYB8	Beta-adducin	Add2	0.950566	1;2;3	S	2.63543e-25	DKTESVTSGPLSPEGS(0.833)PS(0.171)KS(0.951)PS(0.046)K	_DKTESVTSGPLSPEGS(ph)PSKS(ph)PSK_	3	821.363	700
Q7TQF7	Amphiphysin	Amph	0.949622	2	S	2.33286e-12	T(0.13)PS(0.87)PPEEPSPLPS(0.95)PT(0.049)AS(0.001)PNHTLAPASPAPVRPR	_TPS(ph)PPEEPSPLPS(ph)PTASPNHTLAPASPAPVRPR_	4	878.921	272
Q99P72	Reticulon-4	Rtn4	0.948759	2	S	0.000157021	RRGS(0.925)GS(0.949)VDET(0.126)LFALPAASEPVIPSSAEK	_RRGS(ph)GS(ph)VDETLFALPAASEPVIPSSAEK_	3	1011.14	167
Q99NE5	Regulating synaptic membrane exocytosis protein 1	Rims1	0.948577	2	S	9.37001e-05	MERPS(0.005)IS(0.012)VIS(0.949)PT(0.036)S(0.999)PGALK	_MERPSISVIS(ph)PTS(ph)PGALK_	2	1015.48	563
Q9QYX7	Protein piccolo	Pclo	0.948192	1	S	2.86592e-12	AYLQGVAEDRDYMS(0.948)DS(0.03)EVS(0.005)S(0.008)T(0.008)RPS(0.002)R	_AYLQGVAEDRDYMS(ph)DSEVSSTRPSR_	3	967.09	3763
O88703	Potassium/sodium hyperpolarization-activated cyclic nucleotide-gated channel 2	Hcn2	0.94785	2	S	0.0428121	T(0.462)S(0.518)PY(0.019)GVPGS(0.948)PAT(0.052)R	_TS(ph)PYGVPGS(ph)PATR_	2	725.294	771
Q80ZF8	Brain-specific angiogenesis inhibitor 3	Bai3	0.947416	1	S	1.10581e-121	SETGSTISMS(0.053)S(0.947)LER	_SETGSTISMSS(ph)LER_	2	782.832	1411
Q62261	Spectrin beta chain, brain 1	Sptbn1	0.947295	1	S	5.45403e-25	AQTLPTSVVTITSES(0.052)S(0.947)PGKR	_AQTLPTSVVTITSESS(ph)PGKR_	2	1070.04	2340
Q8JZQ9	Eukaryotic translation initiation factor 3 subunit B	Eif3b	0.947103	1;2	S	5.89055e-19	AKPAAQSEEETAT(0.053)S(0.947)PAAS(0.992)PT(0.008)PQSAER	_AKPAAQSEEETATS(ph)PAAS(ph)PTPQSAER_	2	1386.59	75
Q9JHS9	Protein CWC15 homolog	Cwc15	0.946998	2	T	5.83926e-10	LDQIPAANLDADDPLT(0.947)DEEDEDFEEES(0.863)DDDDT(0.19)AALLAELEK	_LDQIPAANLDADDPLT(ph)DEEDEDFEEES(ph)DDDDTAALLAELEK_	4	1174.48	110
Q8R1Q8	Cytoplasmic dynein 1 light intermediate chain 1	Dync1li1	0.946326	1;2;3	S	2.87447e-18	KPAS(0.053)VS(0.946)PT(0.848)T(0.223)PT(0.214)S(0.706)PT(0.008)EGEAS(0.001)	_KPASVS(ph)PT(ph)TPTS(ph)PTEGEAS_	2	1042.4	510
F6X0J3		Fam149a	0.944619	3	S	0.00573817	T(1)LRGFS(0.945)AS(0.056)GARGS(0.999)GLGGR	_T(ph)LRGFS(ph)ASGARGS(ph)GLGGR_	2	973.905	94
A2A5Y6	Microtubule-associated protein	Mapt	0.944272	2	S	0.0251126	VAVVRT(1)PPKS(0.944)PS(0.051)AS(0.005)K	_VAVVRT(ph)PPKS(ph)PSASK_	3	561.946	543
Q6PIE5	Sodium/potassium-transporting ATPase subunit alpha-2	Atp1a2	0.944209	1	S	0.0205577	EDS(0.944)PQS(0.056)HVLVMK	_EDS(ph)PQSHVLVMK_	2	725.326	496
E9QB01		Ncam1	0.944048	1	T	2.36932e-11	HTEPNET(0.056)T(0.944)PLTEPEKGPVETK	_HTEPNETT(ph)PLTEPEKGPVETK_	3	805.376	803
Q3UHB8		Gm1568	0.943865	2	S	9.47413e-05	S(0.002)FS(0.998)LGDLS(0.048)HS(0.944)PQT(0.009)AQHVER	_SFS(ph)LGDLSHS(ph)PQTAQHVER_	3	752.654	310
Q60771	Claudin-11	Cldn11	0.943695	1;2	S	1.54399e-18	FYYSS(0.335)GS(0.625)S(0.064)S(0.944)PT(0.032)HAK	_FYYSSGS(ph)SS(ph)PTHAK_	2	839.813	198
Q91W39	Nuclear receptor coactivator 5	Ncoa5	0.942491	1	S	0.000333293	MNTAPS(0.004)RPS(0.942)PT(0.054)R	_(ac)MNTAPSRPS(ph)PTR_	2	718.821	9
Q9EQH3	Vacuolar protein sorting-associated protein 35	Vps35	0.941977	1	S	3.06146e-11	S(0.058)RRES(0.942)PESEGPIYEGLIL	_SRRES(ph)PESEGPIYEGLIL_	2	1056.5	783
E9Q9H0	Disks large homolog 1	Dlg1	0.941742	1	S	2.42209e-05	NLSEIENVHGFVS(0.036)HS(0.023)HIS(0.942)PIK	_NLSEIENVHGFVSHSHIS(ph)PIK_	3	808.728	158
P39447	Tight junction protein ZO-1	Tjp1	0.941019	1	S	0.0023089	AVPVS(0.941)PS(0.059)AVEEDEDEDGHTVVATAR	_AVPVS(ph)PSAVEEDEDEDGHTVVATAR_	3	887.396	1614
E9Q9Q2		R3hdm1	0.940423	1	S	1.99146e-10	KAAS(0.94)T(0.06)DLGAGEAVVGK	_KAAS(ph)TDLGAGEAVVGK_	2	777.382	1007
B7ZBV9	Potassium voltage-gated channel subfamily KQT member 2	Kcnq2	0.940263	1;2	S	3.60056e-17	RS(0.94)PS(0.06)ADQSLDDS(0.997)PS(0.003)KVPK	_RS(ph)PSADQSLDDS(ph)PSKVPK_	3	691.968	466
Q9QYX7	Protein piccolo	Pclo	0.94007	2	S	7.57534e-05	DSFSQES(0.06)S(0.94)PS(0.118)S(0.724)PS(0.158)DLAK	_DSFSQESS(ph)PSS(ph)PSDLAK_	2	964.864	1338
B7ZCJ1	Rho GTPase-activating protein 21	Arhgap21	0.940035	2	S	0.0284703	KGS(0.992)S(0.94)S(0.067)EVFS(0.001)DAAR	_KGS(ph)S(ph)SEVFSDAAR_	2	750.792	929
Q6ZPQ6	Membrane-associated phosphatidylinositol transfer protein 2	Pitpnm2	0.939614	2	S	0.0410255	GAS(0.94)PS(0.107)RHS(0.792)IS(0.161)EWR	_GAS(ph)PSRHS(ph)ISEWR_	2	815.332	316
Q9ES97	Reticulon-3	Rtn3	0.939535	2	S	1.01918e-05	YVEDT(0.121)DGS(0.94)S(0.94)PEDLMAVLTGAEEK	_YVEDTDGS(ph)S(ph)PEDLMAVLTGAEEK_	3	872.683	596
Q9ES97	Reticulon-3	Rtn3	0.939535	2	S	1.01918e-05	YVEDT(0.121)DGS(0.94)S(0.94)PEDLMAVLTGAEEK	_YVEDTDGS(ph)S(ph)PEDLMAVLTGAEEK_	3	872.683	597
E9PUL5	Proline-rich transmembrane protein 2	Prrt2	0.93863	1	S	0.0177123	AAS(0.939)S(0.05)S(0.011)QVSEMK	_(ac)AAS(ph)SSQVSEMK_	2	623.755	4
Q5XG69	Protein FAM169A	Fam169a	0.937605	1	S	2.32262e-17	TSPDTDSEMLIDQSPS(0.009)DDKGHT(0.019)EENLS(0.938)PVS(0.035)K	_TSPDTDSEMLIDQSPSDDKGHTEENLS(ph)PVSK_	3	1147.16	512
Q6PAJ1	Breakpoint cluster region protein	Bcr	0.937165	1	S	0.000213254	HQDGLPY(0.002)IDDS(0.937)PS(0.04)S(0.014)S(0.006)PHLSSK	_HQDGLPYIDDS(ph)PSSSPHLSSK_	3	783.013	461
O54781	SRSF protein kinase 2	Srpk2	0.936606	2	S	0.022659	T(0.002)VS(0.937)AS(0.209)S(0.651)T(0.2)GDLPK	_TVS(ph)ASS(ph)TGDLPK_	2	661.767	487
O88935	Synapsin-1	Syn1	0.936204	1	S	7.21237e-09	PQPPPPPPS(0.056)AAS(0.936)PGAT(0.007)PGSATASAER	_PQPPPPPPSAAS(ph)PGATPGSATASAER_	3	826.055	39
Q3UGY8	Brefeldin A-inhibited guanine nucleotide-exchange protein 3	Arfgef3	0.935872	1	S	2.86828e-07	DGAES(0.032)S(0.032)RDS(0.936)MEINEADFR	_DGAESSRDS(ph)MEINEADFR_	3	703.612	471
Q5U3K5	Rab-like protein 1	Parf	0.935408	1	T	1.72446e-05	FPVREDLS(0.064)DVT(0.935)DEDTGPAQPPPPSK	_FPVREDLSDVT(ph)DEDTGPAQPPPPSK_	3	925.423	597
P08553	Neurofilament medium polypeptide	Nefm	0.9354	1;2	S	5.40546e-28	EGS(0.935)S(0.935)EKDEGEQEEEEGET(0.129)EAEGEGEEAEAK	_EGS(ph)S(ph)EKDEGEQEEEEGETEAEGEGEEAEAK_	3	1129.74	550
P08553	Neurofilament medium polypeptide	Nefm	0.9354	1;2	S	5.40546e-28	EGS(0.935)S(0.935)EKDEGEQEEEEGET(0.129)EAEGEGEEAEAK	_EGS(ph)S(ph)EKDEGEQEEEEGETEAEGEGEEAEAK_	3	1129.74	551
A9DA50	Leucine-rich repeat and immunoglobulin-like domain-containing nogo receptor-interacting protein 1	Lingo1	0.935008	1	S	0.00484425	HNIEIEY(0.019)VPRKS(0.935)DAGIS(0.035)S(0.01)ADAPR	_HNIEIEYVPRKS(ph)DAGISSADAPR_	4	652.066	602
P55821	Stathmin-2	Stmn2	0.934351	1;2	S	9.2024e-05	ASGQAFELILKPPS(0.934)PIS(0.066)EAPR	_ASGQAFELILKPPS(ph)PISEAPR_	3	763.394	62
P06837	Neuromodulin	Gap43	0.934331	1	S	3.66792e-59	EGDGSATTDAAPAT(0.061)S(0.934)PKAEEPS(0.004)KAGDAPSEEK	_EGDGSATTDAAPATS(ph)PKAEEPSKAGDAPSEEK_	3	1061.13	96
Q9QYX7	Protein piccolo	Pclo	0.933928	1;2	S	7.6645e-11	DQFGS(0.533)S(0.533)HS(0.934)LPEVQQHMR	_DQFGS(ph)SHS(ph)LPEVQQHMR_	3	714.954	4325
Q5XG69	Protein FAM169A	Fam169a	0.933199	2	S	2.85567e-07	AVDS(0.933)S(0.8)S(0.267)EEIEVEVPVVDRR	_AVDS(ph)S(ph)SEEIEVEVPVVDRR_	2	1138	630
P14873	Microtubule-associated protein 1B	Map1b	0.932837	1;2	S	7.53374e-23	ES(0.067)S(0.933)PLYS(0.999)PGFS(0.001)DSTSAAK	_ESS(ph)PLYS(ph)PGFSDSTSAAK_	2	995.89	1789
O08539	Myc box-dependent-interacting protein 1	Bin1	0.932233	1	S	0.0450493	VNHEPEPAS(0.02)GAS(0.932)PGAT(0.047)IPK	_VNHEPEPASGAS(ph)PGATIPK_	3	646.97	324
Q9JKC6	Cell cycle exit and neuronal differentiation protein 1	Cend1	0.931492	1	S	2.02374e-17	ADPVLLNNHSNLKPAPTVPAAPS(0.061)S(0.931)PDAT(0.004)S(0.004)EPK	_ADPVLLNNHSNLKPAPTVPAAPSS(ph)PDATSEPK_	4	829.662	90
Q7M750	Opalin	Opalin	0.930632	1	S	0.000737691	IS(0.034)ENPRRS(0.931)PT(0.035)HEMNPR	_ISENPRRS(ph)PTHEMNPR_	4	500.983	90
Q9CSN1	SNW domain-containing protein 1	Snw1	0.930337	2	S	0.0226166	GPPS(1)PPAPVMHS(0.93)PS(0.07)R	_GPPS(ph)PPAPVMHS(ph)PSR_	2	837.349	232
Q9ES97	Reticulon-3	Rtn3	0.930133	1	T	4.75386e-11	ET(0.067)T(0.93)GGAPT(0.001)MS(0.001)PDLEQEQLTIR	_ETT(ph)GGAPTMSPDLEQEQLTIR_	3	785.358	666
F8VPN7	Dedicator of cytokinesis protein 9	Dock9	0.92898	1	S	0.00611571	LDKLPVHVYEVDEEADKDEDAAS(0.929)LGS(0.071)QK	_LDKLPVHVYEVDEEADKDEDAAS(ph)LGSQK_	4	795.871	164
Q8CAA7	Glucose 1,6-bisphosphate synthase	Pgm2l1	0.928867	1	S	0.00106211	AVAGVMIT(0.071)AS(0.929)HNR	_AVAGVMITAS(ph)HNR_	2	703.834	175
E9QLK9	Clathrin coat assembly protein AP180	Snap91	0.928742	1;2	S	4.06222e-11	SSPATTVT(0.019)S(0.929)PNS(0.039)T(0.013)PAK	_SSPATTVTS(ph)PNSTPAK_	2	813.375	313
P70698	CTP synthase 1	Ctps	0.928407	1	S	0.00146768	SGSS(0.069)S(0.928)PDS(0.002)EITELK	_SGSSS(ph)PDSEITELK_	2	758.824	575
Q8BR63	Protein FAM177A1	Fam177a1	0.927595	2	T	0.00171984	VIHFVS(0.001)GET(0.002)MEEY(0.18)S(0.889)T(0.928)DEDEVDGLDKK	_VIHFVSGETMEEYS(ph)T(ph)DEDEVDGLDKK_	3	1044.76	66
Q6PB70	Anoctamin-8	Ano8	0.927458	1	S	0.00852859	RRPGPS(0.006)PDGLLEEGS(0.927)PT(0.066)MVEK	_RRPGPSPDGLLEEGS(ph)PTMVEK_	3	778.038	637
E9QKI4	Proline-rich AKT1 substrate 1	Akt1s1	0.927365	2	S	2.29696e-10	S(0.44)S(0.56)DEENGPPS(0.073)S(0.927)PDLDR	_SS(ph)DEENGPPSS(ph)PDLDR_	2	931.33	284
B9EKR1		Ptprz1	0.927045	1	S	0.000315606	EVS(0.073)ADVS(0.927)EEENFLTDFK	_EVSADVS(ph)EEENFLTDFK_	2	1019.93	576
Q6ZPE2	Myotubularin-related protein 5	Sbf1	0.926493	1	S	7.48857e-19	ALYLEPS(0.049)DGVS(0.926)PT(0.025)QETGEAQSQDDER	_ALYLEPSDGVS(ph)PTQETGEAQSQDDER_	3	968.08	706
E9PUL5	Proline-rich transmembrane protein 2	Prrt2	0.925947	1;2	T	1.35586e-17	AELAPET(0.006)T(0.035)ET(0.926)PVET(0.033)PETVQATDLSLNPEEGSK	_AELAPETTET(ph)PVETPETVQATDLSLNPEEGSK_	3	1155.2	74
P14873	Microtubule-associated protein 1B	Map1b	0.925413	1	S	3.91917e-79	QGVDDIEKFEDEGAGFEES(0.059)S(0.925)ET(0.016)GDYEEK	_QGVDDIEKFEDEGAGFEESS(ph)ETGDYEEK_	3	1073.76	934
Q99P72	Reticulon-4	Rtn4	0.925309	1;2	S	1.49082e-27	RRGS(0.925)GS(0.949)VDET(0.126)LFALPAASEPVIPSSAEK	_RRGS(ph)GS(ph)VDETLFALPAASEPVIPSSAEK_	3	1011.14	165
Q8CIP4	MAP/microtubule affinity-regulating kinase 4	Mark4	0.925039	1	S	5.51568e-36	RS(0.925)PT(0.074)S(0.001)TGDTELKEER	_RS(ph)PTSTGDTELKEER_	2	893.404	438
Q9ER67		Maged2	0.924875	1	S	0.00407072	GKHPDGEEDGNS(0.925)DQS(0.071)QAS(0.004)EATGGR	_GKHPDGEEDGNS(ph)DQSQASEATGGR_	3	837	191
Q9JIK5	Nucleolar RNA helicase 2	Ddx21	0.924408	1	S	0.000117142	EIIT(0.076)EEPS(0.924)EEEADMPKPK	_EIITEEPS(ph)EEEADMPKPK_	2	1076.47	118
Q99JF8	PC4 and SFRS1-interacting protein	Psip1	0.923376	2	S	5.73166e-08	NLAKPGVT(0.021)S(0.11)T(0.591)S(0.354)DS(0.923)EDEDDQEGEK	_NLAKPGVTST(ph)SDS(ph)EDEDDQEGEK_	3	871.004	274
P14873	Microtubule-associated protein 1B	Map1b	0.9227	2;3;4	S	1.71688e-05	DVS(0.076)DERLS(0.923)PAKS(0.395)PS(0.414)LS(0.207)PS(0.397)PPS(0.588)PIEK	_DVSDERLS(ph)PAKS(ph)PSLSPSPPS(ph)PIEK_	3	954.087	1247
P16054	Protein kinase C epsilon type	Prkce	0.921655	1	S	2.60087e-18	LAAGAESPQPAS(0.056)GNS(0.922)PS(0.022)EDDRSK	_LAAGAESPQPASGNS(ph)PSEDDRSK_	3	784.343	337
Q4VA93	Protein kinase C	Prkca	0.920471	1	S	7.02445e-26	STLNPQWNES(0.92)FT(0.08)FK	_STLNPQWNES(ph)FTFK_	2	889.893	226
F6SLK1		Gak	0.920373	1	S	6.83943e-11	FEEKEPET(0.001)GLDNT(0.079)S(0.92)PK	_FEEKEPETGLDNTS(ph)PK_	2	950.914	112
B1AQY2	Rho GTPase-activating protein 23	Arhgap23	0.919632	1	S	0.000321571	RHS(0.92)T(0.061)S(0.02)DLSDATFSDIR	_RHS(ph)TSDLSDATFSDIR_	3	629.946	678
P97427	Dihydropyrimidinase-related protein 1	Crmp1	0.919396	2	S	2.42174e-17	HAAPAPS(0.007)AKS(0.998)S(0.919)PS(0.076)KHQPPPIR	_HAAPAPSAKS(ph)S(ph)PSKHQPPPIR_	3	774.37	522
Q8VHJ5	Serine/threonine-protein kinase MARK1	Mark1	0.917081	2	S	0.0112557	S(0.917)RPS(0.518)S(0.518)DLNNS(0.036)T(0.011)LQSPAHLK	_S(ph)RPS(ph)SDLNNSTLQSPAHLK_	3	737.998	390
H3BLH0	Probable global transcription activator SNF2L2	Smarca2	0.915672	3	S	1.26432e-07	IAKEEES(1)EEES(1)NEEEEEDDEEES(0.916)ES(0.084)EAK	_IAKEEES(ph)EEES(ph)NEEEEEDDEEES(ph)ESEAK_	3	1176.4	1539
Q7TME0	Lipid phosphate phosphatase-related protein type 4	Lppr4	0.915662	1	S	2.627e-25	PGSSQLVHIPEETQENIS(0.003)T(0.081)S(0.916)PK	_PGSSQLVHIPEETQENISTS(ph)PK_	2	1229.58	549
P61982	14-3-3 protein gamma	Ywhag	0.915299	1	S	0.00376099	DNLT(0.001)LWT(0.083)S(0.915)DQQDDDGGEGNN	_DNLTLWTS(ph)DQQDDDGGEGNN_	2	1137.43	235
Q14BI1		Slc24a2	0.914805	1	S	1.74792e-61	S(0.915)PT(0.085)AGDKDGPTLPSKPR	_S(ph)PTAGDKDGPTLPSKPR_	3	601.959	374
P28028	Serine/threonine-protein kinase B-raf	Braf	0.914779	1	S	8.42155e-34	RDS(0.915)S(0.085)DDWEIPDGQITVGQR	_RDS(ph)SDDWEIPDGQITVGQR_	3	751.997	483
Z4YJR7		Sorbs2	0.914084	2	S	2.8065e-11	KPLSVS(0.074)PS(0.033)T(0.016)DGLRS(0.914)PS(0.962)PPPR	_KPLSVSPSTDGLRS(ph)PS(ph)PPPR_	3	745.691	137
A0A087WQ31	CLIP-associating protein 1	Clasp1	0.913986	1	S	1.30821e-12	S(0.086)RS(0.914)DIDVNAAASAK	_SRS(ph)DIDVNAAASAK_	2	742.841	600
S4R291	Ankyrin-2	Ank2	0.913523	1	S	2.49964e-11	ES(0.914)ES(0.086)DQEPEEEIGMTSEK	_ES(ph)ESDQEPEEEIGM(ox)TSEK_	2	1075.4	1426
S4R2H6			0.913523	1	S	4.44635e-26	ES(0.914)ES(0.086)DQEPEEEIGMTSEK	_ES(ph)ESDQEPEEEIGM(ox)TSEK_	2	1075.4	1450
E9Q6P5		Ttc7b	0.911778	1	S	4.22784e-17	VEQALSEVAS(0.051)S(0.912)LQS(0.03)S(0.007)APK	_VEQALSEVASS(ph)LQSSAPK_	2	955.959	678
P35436	Glutamate [NMDA] receptor subunit epsilon-1	Grin2a	0.910519	2	S	9.30587e-05	KKS(1)PDFNLT(0.081)GS(0.911)QS(0.009)NMLK	_KKS(ph)PDFNLTGS(ph)QSNMLK_	3	685.639	890
P14873	Microtubule-associated protein 1B	Map1b	0.910355	1	S	0.000142962	MSISEGT(0.09)VS(0.91)DK	_MSISEGTVS(ph)DK_	2	617.257	1523
Q9QYX7	Protein piccolo	Pclo	0.909552	1	S	0.00886304	SMS(0.002)DPKPLS(0.91)PT(0.088)ADESSR	_SMSDPKPLS(ph)PTADESSR_	3	628.94	3616
Q8K2L8	Trafficking protein particle complex subunit 12	Trappc12	0.908035	2	S	0.00221035	LPS(0.002)S(0.002)T(0.002)DKEVVDT(0.086)LS(0.908)NGS(0.721)ET(0.276)DGDDT(0.004)PR	_LPSSTDKEVVDTLS(ph)NGS(ph)ETDGDDTPR_	3	965.732	125
J3QNT7	Epsin-2	Epn2	0.907808	1	S	1.25672e-07	GS(0.092)S(0.908)QPNLSTSYSEQEYGK	_GSS(ph)QPNLSTSYSEQEYGK_	2	1021.42	173
Q9QYB5	Gamma-adducin	Add3	0.907612	2	S	3.63217e-11	TEEVLS(0.003)PDGS(0.908)PS(0.204)KS(0.821)PS(0.065)KK	_TEEVLSPDGS(ph)PSKS(ph)PSKK_	3	678.301	677
Q9JIX8	Apoptotic chromatin condensation inducer in the nucleus	Acin1	0.9075	1	S	2.61322e-05	EAVVDLHADDS(0.073)RIS(0.907)EDET(0.019)ER	_EAVVDLHADDSRIS(ph)EDETER_	3	789.343	898
Q8VD37	SH3-containing GRB2-like protein 3-interacting protein 1	Sgip1	0.907165	2	S	1.33624e-05	DT(0.394)DS(0.453)T(0.246)GS(0.907)PDRDGMQPSPHEPPYHSK	_DTDS(ph)TGS(ph)PDRDGMQPSPHEPPYHSK_	3	966.707	27
Q8C0L9	Glycerophosphocholine phosphodiesterase GPCPD1	Gpcpd1	0.906472	1	S	6.48998e-13	LTLEGLEEDEDDDDDKVS(0.906)PT(0.094)VLHK	_LTLEGLEEDEDDDDDKVS(ph)PTVLHK_	3	931.418	178
P81122	Insulin receptor substrate 2	Irs2	0.904413	1	S	7.11443e-07	ASSPAES(0.087)S(0.904)PEDS(0.009)GYMR	_ASSPAESS(ph)PEDSGYMR_	2	875.835	728
O70166	Stathmin-3	Stmn3	0.903823	4	S	1.67359e-07	ASGQSFEVILKS(0.494)PS(0.602)DLS(0.904)PES(0.999)PVLS(0.589)S(0.412)PPK	_ASGQSFEVILKSPS(ph)DLS(ph)PES(ph)PVLS(ph)SPPK_	3	1068.46	65
Q3URD3	Sarcolemmal membrane-associated protein	Slmap	0.902734	1	S	4.7359e-21	ESDLSDT(0.04)LS(0.903)PS(0.057)KEK	_ESDLSDTLS(ph)PSKEK_	2	808.359	469
A2ACM0	Regulatory-associated protein of mTOR	Rptor	0.902073	1	S	2.22901e-24	ILDTSSLTQSAPAS(0.902)PT(0.098)NK	_ILDTSSLTQSAPAS(ph)PTNK_	2	955.959	863
Q9Z0U1	Tight junction protein ZO-2	Tjp2	0.900127	1	S	1.70814e-07	SYHEAYEPDYGGGYS(0.9)PS(0.1)YDRR	_SYHEAYEPDYGGGYS(ph)PSYDRR_	3	850.34	239
Q810A7	ATP-dependent RNA helicase DDX42	Ddx42	0.90012	1	S	3.31219e-07	YMAENPTAGVVQEEEEDNLEY(0.097)DS(0.9)DGNPIAPS(0.003)KK	_YMAENPTAGVVQEEEEDNLEYDS(ph)DGNPIAPSKK_	3	1240.54	185
P49070	Calcium signal-modulating cyclophilin ligand	Camlg	0.899246	1	S	0.00570185	IMGFHRPGS(0.099)GS(0.899)EEENQT(0.001)K	_IMGFHRPGSGS(ph)EEENQTK_	3	695.302	55
P54726	UV excision repair protein RAD23 homolog A	Rad23a	0.898717	1;2	S	2.84417e-07	EDKS(0.899)PS(0.076)EES(0.164)T(0.151)T(0.138)T(0.339)T(0.117)S(0.108)PES(0.007)IS(0.001)GSVPSSGSSGR	_EDKS(ph)PSEESTTT(ph)TSPESISGSVPSSGSSGR_	3	1044.09	123
P70663	SPARC-like protein 1	Sparcl1	0.896833	1;2	S	1.36779e-05	AEKPS(0.001)ALNS(0.897)EEET(0.101)HEQS(0.001)TEQDK	_AEKPSALNS(ph)EEETHEQSTEQDK_	4	642.525	70
A2AGQ4	MAP kinase-activating death domain protein	Madd	0.896224	1	S	3.24787e-17	S(0.001)S(0.001)S(0.003)S(0.003)TTAS(0.001)S(0.011)S(0.896)PS(0.042)T(0.042)VVHSAHSEAADSTEMGDK	_SSSSTTASSS(ph)PSTVVHSAHSEAADSTEMGDK_	3	1040.1	708
P35235	Tyrosine-protein phosphatase non-receptor type 11	Ptpn11	0.895756	1	Y	1.436e-06	IQNTGDY(0.896)Y(0.104)DLYGGEK	_IQNTGDY(ph)YDLYGGEK_	2	908.377	62
Q99KX1	Myeloid leukemia factor 2	Mlf2	0.894412	1	S	1.51277e-05	LAIQGPEDS(0.894)PS(0.106)R	_LAIQGPEDS(ph)PSR_	2	675.308	237
P11627	Neural cell adhesion molecule L1	L1cam	0.894161	2	S	0.0418478	DET(0.004)FGEY(0.15)RS(0.894)LES(0.951)DNEEK	_DETFGEYRS(ph)LES(ph)DNEEK_	3	736.607	1181
P58871	182 kDa tankyrase-1-binding protein	Tnks1bp1	0.893693	1	S	1.19228e-17	MQAES(0.001)QS(0.894)PT(0.106)NVDLEDKER	_MQAESQS(ph)PTNVDLEDKER_	3	719.644	1063
G3X9J1		Slc8a1	0.89326	1	S	1.01489e-07	TEDGT(0.002)ANAGS(0.893)DY(0.011)EFT(0.087)EGT(0.007)VIFKPGETQK	_TEDGTANAGS(ph)DYEFTEGTVIFKPGETQK_	3	1024.78	452
K4DI58	Cell adhesion molecule 3	Cadm3	0.892137	1	S	3.95261e-07	GT(0.005)Y(0.004)LT(0.056)HEAKGS(0.892)DDAPDADT(0.043)AIINAEGGQSGGDDKK	_GTYLTHEAKGS(ph)DDAPDADTAIINAEGGQSGGDDKK_	4	896.897	402
Q91W96	Anaphase-promoting complex subunit 4	Anapc4	0.89165	2	S	1.28399e-10	IKEEVLS(0.892)ES(0.502)ET(0.606)EAHQDAAALDPDVVIK	_IKEEVLS(ph)ESET(ph)EAHQDAAALDPDVVIK_	3	1032.81	777
Q7TT50	Serine/threonine-protein kinase MRCK beta	Cdc42bpb	0.891091	1	S	4.99062e-05	HSTPSNSSNPSGPPS(0.891)PNS(0.109)PHR	_HSTPSNSSNPSGPPS(ph)PNSPHR_	3	740.985	1692
O54916	RalBP1-associated Eps domain-containing protein 1	Reps1	0.89029	1	S	6.31937e-07	LIDLEDSADVGEQPGEVGY(0.007)S(0.1)GS(0.89)PAEAPPS(0.003)K	_LIDLEDSADVGEQPGEVGYSGS(ph)PAEAPPSK_	3	1032.13	392
Q8BR63	Protein FAM177A1	Fam177a1	0.889297	2	S	0.00171984	VIHFVS(0.001)GET(0.002)MEEY(0.18)S(0.889)T(0.928)DEDEVDGLDKK	_VIHFVSGETMEEYS(ph)T(ph)DEDEVDGLDKK_	3	1044.76	65
P14873	Microtubule-associated protein 1B	Map1b	0.888013	1	T	1.91081e-13	DYNASAS(0.028)T(0.888)IS(0.084)PPSSMEEDKFSK	_DYNASAST(ph)ISPPSSMEEDKFSK_	2	1236.02	1202
A0A087WNU5			0.886937	1	S	1.01785e-11	S(0.113)DKGHS(0.887)PEDDWTEFSSEEIR	_SDKGHS(ph)PEDDWTEFSSEEIR_	3	810.996	701
Q810U3	Neurofascin	Nfasc	0.885022	4	S	0.000923816	DVPLGPEDPKEEDGS(0.771)FDY(0.724)S(0.503)DEDNKPLQGS(0.538)QT(0.524)S(0.885)LDGT(0.056)IK	_DVPLGPEDPKEEDGS(ph)FDY(ph)SDEDNKPLQGS(ph)QTS(ph)LDGTIK_	3	1481.59	1177
Q03517	Secretogranin-2	Scg2	0.884931	1	S	5.86663e-26	RVPS(0.003)PVS(0.112)S(0.885)EDDLQEEEQLEQAIK	_RVPSPVSS(ph)EDDLQEEEQLEQAIK_	3	902.755	533
Q9CQS4	Solute carrier family 25 member 46	Slc25a46	0.883321	1	T	0.0080054	SFGS(0.008)GT(0.009)ELGHWVT(0.099)T(0.883)PPDIPGS(0.001)R	_SFGSGTELGHWVTT(ph)PPDIPGSR_	3	793.365	45
B9EJ86	Oxysterol-binding protein	Osbpl8	0.882115	3	S	1.07025e-06	GYSSPEPDIQDS(0.967)S(0.97)GS(0.882)EAQS(0.174)VKPS(0.004)T(0.003)R	_GYSSPEPDIQDS(ph)S(ph)GS(ph)EAQSVKPSTR_	3	950.37	810
Q9R0L6	Pericentriolar material 1 protein	Pcm1	0.881566	1	S	4.97722e-07	RS(0.118)S(0.882)LVDEAPEDEEFEQK	_RSS(ph)LVDEAPEDEEFEQK_	2	1044.44	645
A2RSJ4	UHRF1-binding protein 1-like	Uhrf1bp1l	0.88105	1	S	5.54822e-08	DGS(0.059)T(0.059)RLS(0.881)LDDDGNHNPPSNPVTGK	_DGSTRLS(ph)LDDDGNHNPPSNPVTGK_	3	858.38	1020
P14873	Microtubule-associated protein 1B	Map1b	0.880508	1;2;3	S	1.75036e-20	TLEVVSPSQSVTGSAGHTPYYQS(0.881)PT(0.119)DEK	_TLEVVSPSQSVTGSAGHTPYYQS(ph)PTDEK_	3	1015.8	1334
E9Q8N8		Slc4a4	0.880067	1	S	8.61819e-06	GS(0.009)LDS(0.88)DNDDEKDPQHS(0.077)S(0.029)NAT(0.005)HHADK	_GSLDS(ph)DNDDEKDPQHSSNATHHADK_	4	700.782	1029
B2RRE2	Unconventional myosin-XVIIIa	Myo18a	0.878873	3	T	8.13577e-06	S(0.009)RDES(0.01)AS(0.05)ET(0.505)S(0.55)T(0.879)PS(0.978)EHS(0.019)AAPSPQVEVR	_SRDESASETS(ph)T(ph)PS(ph)EHSAAPSPQVEVR_	3	994.391	155
Q8VD37	SH3-containing GRB2-like protein 3-interacting protein 1	Sgip1	0.878631	1	T	2.15433e-34	DTDS(0.044)T(0.879)GS(0.077)PDRDGMQPSPHEPPYHSK	_DTDST(ph)GSPDRDGMQPSPHEPPYHSK_	3	940.052	25
Q924N4	Solute carrier family 12 member 6	Slc12a6	0.876766	2	S	3.23286e-07	LT(0.124)S(0.877)IGS(1)DEDEETETYQEK	_LTS(ph)IGS(ph)DEDEETETYQEK_	2	1117.42	1029
Q80TZ3	Putative tyrosine-protein phosphatase auxilin	Dnajc6	0.876591	3	S	0.000817717	SRCEEDHAALVNQES(0.877)EQS(0.853)DDELLT(0.853)LS(0.233)S(0.185)PHGNAEGDKPHGAK	_SRCEEDHAALVNQES(ph)EQS(ph)DDELLT(ph)LSSPHGNAEGDKPHGAK_	4	1160.98	478
Q61644	Protein kinase C and casein kinase substrate in neurons protein 1	Pacsin1	0.876229	2	S	9.10524e-07	KAEGATLSNAT(0.025)GAVES(0.134)T(0.134)S(0.134)QAGDRGS(0.571)VS(0.118)S(0.876)Y(0.005)DR	_KAEGATLSNATGAVESTSQAGDRGS(ph)VSS(ph)YDR_	3	1078.13	346
O54916	RalBP1-associated Eps domain-containing protein 1	Reps1	0.876166	1	S	3.0983e-18	SHSGT(0.124)S(0.876)PDNTAPPPPPPRPQPSHSR	_SHSGTS(ph)PDNTAPPPPPPRPQPSHSR_	3	894.412	539
P54728	UV excision repair protein RAD23 homolog B	Rad23b	0.876165	1	T	0.0371114	ILS(0.016)DDT(0.876)ALKEY(0.108)KIDEK	_ILSDDT(ph)ALKEYKIDEK_	3	654.322	57
P16283	Anion exchange protein 3	Slc4a3	0.876013	1	S	0.0122871	GS(0.876)PS(0.124)GLAPILR	_GS(ph)PSGLAPILR_	2	574.297	296
Q7TSH8	Uncharacterized protein KIAA0195	Kiaa0195	0.875004	1	S	4.19878e-07	VEPPHS(0.125)S(0.875)HEDLTDDLSTR	_VEPPHSS(ph)HEDLTDDLSTR_	3	705.639	445
Q9QYX7	Protein piccolo	Pclo	0.874498	1	S	2.06923e-17	KDS(0.001)FS(0.002)QES(0.001)S(0.004)PS(0.874)S(0.118)PSDLAK	_KDSFSQESSPS(ph)SPSDLAK_	2	988.928	1340
E9PZA8	Synaptotagmin-7	Syt7	0.874433	1	T	4.4053e-06	NSLET(0.08)VGT(0.874)PDS(0.045)GR	_NSLETVGT(ph)PDSGR_	2	706.806	58
Q5DQR4	Syntaxin-binding protein 5-like	Stxbp5l	0.874395	1	S	0.00334186	S(0.058)LS(0.874)GS(0.054)T(0.012)NT(0.001)VSSEGVTK	_SLS(ph)GSTNTVSSEGVTK_	2	817.369	590
Q80Y56	Rabenosyn-5	Zfyve20	0.874272	1	S	1.39564e-11	DSLS(0.006)T(0.032)HT(0.079)S(0.874)PS(0.008)QSPNSVHGSR	_DSLSTHTS(ph)PSQSPNSVHGSR_	3	720.982	214
Q9JLM8	Serine/threonine-protein kinase DCLK1	Dclk1	0.874039	1;3	S	6.36635e-18	SPSPSPT(0.123)S(0.874)PGS(0.003)LRK	_SPSPSPTS(ph)PGSLRK_	2	739.356	337
B1AZP2	Disks large-associated protein 4	Dlgap4	0.873471	2	S	2.58353e-20	SEVTSQSGLS(0.003)NS(0.123)S(0.873)DS(0.585)LDS(0.114)S(0.114)T(0.114)RPPS(0.031)VT(0.043)R	_SEVTSQSGLSNSS(ph)DS(ph)LDSSTRPPSVTR_	3	981.087	609
Q8C845	EF-hand domain-containing protein D2	Efhd2	0.873032	1	S	9.08505e-07	ADLNQGIGEPQS(0.873)PS(0.127)RR	_ADLNQGIGEPQS(ph)PSRR_	2	902.921	74
Q9QYC0	Alpha-adducin	Add1	0.872458	1	S	1.13442e-23	EKSPPDQS(0.872)AVPNT(0.127)PPSTPVKLEEDLPQEPTSR	_EKSPPDQS(ph)AVPNTPPSTPVKLEEDLPQEPTSR_	3	1184.24	605
E9Q8T1	Transforming acidic coiled-coil-containing protein 2	Tacc2	0.87221	1	S	0.0171348	ET(0.07)QQEPGEES(0.872)PVPS(0.056)EEHLAPET(0.001)K	_ETQQEPGEES(ph)PVPSEEHLAPETK_	3	876.716	2057
Q99NE5	Regulating synaptic membrane exocytosis protein 1	Rims1	0.871882	1	S	8.59793e-13	S(0.127)S(0.872)DS(0.001)DVSDVSAISR	_SS(ph)DSDVSDVSAISR_	2	752.812	1111
E9PUI5	Formin-binding protein 1-like	Fnbp1l	0.870716	1	S	1.10416e-14	HSSDINHLVT(0.12)QGRES(0.871)PEGS(0.005)Y(0.004)TDDANQEVR	_HSSDINHLVTQGRES(ph)PEGSYTDDANQEVR_	4	831.116	501
Q9Z2C9	Myotubularin-related protein 7	Mtmr7	0.870695	1	S	0.023304	SPS(0.001)GGEHAPS(0.015)EDS(0.113)GKDRDS(0.871)DEAVFLTA	_SPSGGEHAPSEDSGKDRDS(ph)DEAVFLTA_	3	947.733	652
Q8VCE2	GPN-loop GTPase 1	Gpn1	0.870549	1	S	5.25045e-43	GTLDEEDEEADS(0.871)DT(0.129)DDIDHR	_GTLDEEDEEADS(ph)DTDDIDHR_	3	786.291	338
Q9DD18	D-tyrosyl-tRNA(Tyr) deacylase 1	Dtd1	0.869906	2	S	9.96085e-07	S(0.167)AS(0.87)S(0.963)GAEGDVSSEREP	_SAS(ph)S(ph)GAEGDVSSEREP_	2	862.806	196
Q9CT10	Ran-binding protein 3	Ranbp3	0.869728	1	S	9.37833e-86	S(0.87)PS(0.13)ESAEETHTLEEK	_S(ph)PSESAEETHTLEEK_	2	877.362	146
Q9QYX7	Protein piccolo	Pclo	0.868794	1;2	S	9.94231e-30	DSFSQESS(0.007)PS(0.037)S(0.869)PS(0.086)DLAK	_DSFSQESSPSS(ph)PSDLAK_	2	924.88	1341
P20357	Microtubule-associated protein 2	Map2	0.868566	1;2	S	1.94837e-18	AS(0.187)QPS(0.813)PPAQEAGYSTLAQSYTPDHPSELPEEPS(0.131)S(0.869)PQER	_ASQPS(ph)PPAQEAGYSTLAQSYTPDHPSELPEEPSS(ph)PQER_	3	1409.27	655
E9PWE8	Dihydropyrimidinase-related protein 3	Dpysl3	0.866283	1	T	1.56204e-13	GMYDGPVFDLT(0.034)T(0.1)T(0.866)PK	_GMYDGPVFDLTTT(ph)PK_	2	861.378	622
P27546	Microtubule-associated protein 4	Map4	0.866044	2	T	2.70791e-12	AAVGVTGNDIT(0.134)T(0.866)PPNKEPPPS(1)PEKK	_AAVGVTGNDITT(ph)PPNKEPPPS(ph)PEKK_	3	902.093	658
D3Z4V2	Pre-mRNA 3'-end-processing factor FIP1	Fip1l1	0.865373	2	S	3.80727e-05	ERDHS(0.865)PT(0.135)PS(0.002)VFNS(0.998)DEER	_ERDHS(ph)PTPSVFNS(ph)DEER_	3	721.279	493
E0CXB9	Catenin alpha-2	Ctnna2	0.864816	1	S	2.95082e-119	QVQEAIAGISSAAQAT(0.048)S(0.865)PT(0.087)DEAK	_QVQEAIAGISSAAQATS(ph)PTDEAK_	2	1177.05	275
Q61136	Serine/threonine-protein kinase PRP4 homolog	Prpf4b	0.864325	2	S	0.0281273	S(0.864)KDAS(0.136)PINRWS(0.68)PT(0.32)R	_S(ph)KDASPINRWS(ph)PTR_	2	887.887	427
Q9JHS9	Protein CWC15 homolog	Cwc15	0.863362	2	S	5.83926e-10	LDQIPAANLDADDPLT(0.947)DEEDEDFEEES(0.863)DDDDT(0.19)AALLAELEK	_LDQIPAANLDADDPLT(ph)DEEDEDFEEES(ph)DDDDTAALLAELEK_	4	1174.48	121
Q9CYT6	Adenylyl cyclase-associated protein 2	Cap2	0.862442	1	S	5.44636e-22	S(0.113)NS(0.862)PQKHT(0.025)PVLELEGK	_SNS(ph)PQKHTPVLELEGK_	3	615.303	316
Q9Z0P4	Paralemmin-1	Palm	0.861198	2	T	1.60858e-06	T(0.064)S(0.075)T(0.861)PVRS(0.997)PGGS(0.002)T(0.001)MMK	_TST(ph)PVRS(ph)PGGSTMMK_	3	566.233	153
E9Q4K0	Actin-binding LIM protein 2	Ablim2	0.860058	2	S	3.62054e-07	T(0.539)S(0.585)S(0.86)PS(0.012)S(0.003)AGSVSLGHYTPTSR	_TS(ph)S(ph)PSSAGSVSLGHYTPTSR_	3	713.631	384
O54829	Regulator of G-protein signaling 7	Rgs7	0.859469	1;2	S	4.85566e-26	S(0.128)HS(0.859)PT(0.607)HT(0.39)PT(0.015)PETKPPTEDELHQQIK	_SHS(ph)PT(ph)HTPTPETKPPTEDELHQQIK_	4	749.586	241
Q920I9	WD repeat-containing protein 7	Wdr7	0.859052	1	S	0.0118033	TYQVPPVQPAS(0.859)PGS(0.141)HNALK	_TYQVPPVQPAS(ph)PGSHNALK_	3	691.005	1455
A2AGQ4	MAP kinase-activating death domain protein	Madd	0.858007	1	T	7.93807e-12	AT(0.858)LS(0.138)DS(0.004)EIETNSATSAIFGK	_AT(ph)LSDSEIETNSATSAIFGK_	3	707.991	1236
Q8BRJ3	RELT-like protein 2	Rell2	0.857952	1	S	0.0190874	YGLHEHRDGS(0.858)PT(0.142)DR	_YGLHEHRDGS(ph)PTDR_	3	573.913	187
Q4KMM3	Oxidation resistance protein 1	Oxr1	0.857833	1	S	5.49195e-28	VVS(0.071)S(0.858)T(0.071)S(0.001)EEEEAFTEK	_VVSS(ph)TSEEEEAFTEK_	2	876.367	202
G3UW55		A230065H16Rik	0.856374	1	S	6.88422e-10	STPQPAAPES(0.856)PT(0.144)EGPR	_(ac)STPQPAAPES(ph)PTEGPR_	2	872.383	11
A2ARP8	Microtubule-associated protein 1A	Mtap1a	0.853295	1;2	S	2.07724e-28	ET(0.143)S(0.853)PT(0.004)RGEPVPAWEGKS(1)PEQEVR	_ETS(ph)PTRGEPVPAWEGKS(ph)PEQEVR_	2	1363.6	1872
Q80TZ3	Putative tyrosine-protein phosphatase auxilin	Dnajc6	0.852571	3	S	0.000817717	SRCEEDHAALVNQES(0.877)EQS(0.853)DDELLT(0.853)LS(0.233)S(0.185)PHGNAEGDKPHGAK	_SRCEEDHAALVNQES(ph)EQS(ph)DDELLT(ph)LSSPHGNAEGDKPHGAK_	4	1160.98	481
Q80TZ3	Putative tyrosine-protein phosphatase auxilin	Dnajc6	0.852523	3	T	0.000817717	SRCEEDHAALVNQES(0.877)EQS(0.853)DDELLT(0.853)LS(0.233)S(0.185)PHGNAEGDKPHGAK	_SRCEEDHAALVNQES(ph)EQS(ph)DDELLT(ph)LSSPHGNAEGDKPHGAK_	4	1160.98	487
Q80X80	C2 domain-containing protein 2-like	C2cd2l	0.852285	1;2	S	3.85212e-48	LDS(0.042)PS(0.042)RS(0.852)PS(0.063)KVEVTEK	_LDSPSRS(ph)PSKVEVTEK_	2	919.948	468
Q8VD37	SH3-containing GRB2-like protein 3-interacting protein 1	Sgip1	0.852052	1	S	1.44539e-11	VAEQTFIKDDYLET(0.001)LS(0.147)S(0.852)PK	_VAEQTFIKDDYLETLSS(ph)PK_	3	755.363	398
A6ZI44	Fructose-bisphosphate aldolase	Aldoa	0.85046	1	S	3.56245e-27	GILAADES(0.85)T(0.145)GS(0.004)IAKR	_GILAADES(ph)TGSIAKR_	2	784.888	90
Q8BRJ3	RELT-like protein 2	Rell2	0.850085	1	S	4.53344e-20	T(0.075)S(0.075)RGS(0.85)EPDDAQLQPPEDDDVNEDTVER	_TSRGS(ph)EPDDAQLQPPEDDDVNEDTVER_	3	1032.1	52
Q8R1Q8	Cytoplasmic dynein 1 light intermediate chain 1	Dync1li1	0.848463	3	T	0.000115979	KPAS(0.053)VS(0.946)PT(0.848)T(0.223)PT(0.214)S(0.706)PT(0.008)EGEAS(0.001)	_KPASVS(ph)PT(ph)TPTS(ph)PTEGEAS_	2	1042.4	512
A2A543	Voltage-dependent L-type calcium channel subunit beta-1	Cacnb1	0.848435	1	S	0.00849339	S(0.848)GDNS(0.12)S(0.026)S(0.005)S(0.001)LGDVVTGTR	_S(ph)GDNSSSSLGDVVTGTR_	2	859.865	186
E9PUJ6	Probable E3 ubiquitin-protein ligase MYCBP2	Mycbp2	0.847556	1	S	0.000316135	QVS(0.848)T(0.152)ENDSTLVHR	_QVS(ph)TENDSTLVHR_	2	783.351	1621
P14873	Microtubule-associated protein 1B	Map1b	0.847411	1	S	7.82752e-06	VLS(0.145)PLRS(0.847)PPLLGS(0.006)ES(0.001)PYEDFLSADSK	_VLSPLRS(ph)PPLLGSESPYEDFLSADSK_	3	962.139	1395
E9Q1T1	Calcium/calmodulin-dependent protein kinase type II subunit delta	Camk2d	0.846942	1	T	2.20064e-06	ESTES(0.008)S(0.015)NT(0.13)T(0.847)IEDEDVK	_ESTESSNTT(ph)IEDEDVK_	2	932.373	371
Q14BI1		Slc24a2	0.846401	1	S	1.68204e-08	GGS(0.846)S(0.154)ASLHNSLMR	_GGS(ph)SASLHNSLMR_	2	698.806	396
Q9Z1R2	Large proline-rich protein BAG6	Bag6	0.845903	1	S	2.17986e-14	RVGDPPQTLPEEPMEVQGAERT(0.154)S(0.846)PEPQR	_RVGDPPQTLPEEPMEVQGAERTS(ph)PEPQR_	3	1070.83	986
O54916	RalBP1-associated Eps domain-containing protein 1	Reps1	0.845569	2	S	0.000812372	PSAEQQEPVS(0.007)PVVS(0.045)PQQS(0.846)PPT(0.533)S(0.533)PHT(0.037)WR	_PSAEQQEPVSPVVSPQQS(ph)PPT(ph)SPHTWR_	3	1038.46	170
O35927	Catenin delta-2	Ctnnd2	0.845265	1	S	9.40717e-11	TSTAPS(0.155)S(0.845)PGVDSVPLQR	_TSTAPSS(ph)PGVDSVPLQR_	2	889.92	458
S4R291	Ankyrin-2	Ank2	0.845192	1	T	4.42609e-27	TQSESETQES(0.126)LT(0.845)PS(0.028)EVT(0.001)KPFPPSDASVK	_TQSESETQESLT(ph)PSEVTKPFPPSDASVK_	3	1029.47	2328
A2ARP8	Microtubule-associated protein 1A	Mtap1a	0.84432	1	T	4.05405e-11	VPSAPGQESPVPDTKS(0.029)T(0.126)PPT(0.844)R	_VPSAPGQESPVPDTKSTPPT(ph)R_	3	743.358	2038
Q9DBS2	Tumor protein p63-regulated gene 1-like protein	Tprg1l	0.843712	1	S	4.16214e-07	DT(0.156)VDS(0.844)AGT(0.001)SPTAVLAAGEDAGAGRPGAGTPLR	_DTVDS(ph)AGTSPTAVLAAGEDAGAGRPGAGTPLR_	3	1006.81	10
Q8K019	Bcl-2-associated transcription factor 1	Bclaf1	0.843347	2	S	0.00513562	Y(0.156)S(0.843)PS(0.007)QNS(0.984)PIHHIPS(0.011)RR	_YS(ph)PSQNS(ph)PIHHIPSRR_	3	679.301	284
Q6PE13	Proline-rich transmembrane protein 3	Prrt3	0.84309	1	S	0.0142985	GLAS(0.144)S(0.843)PT(0.012)GGALRPR	_GLASS(ph)PTGGALRPR_	2	710.359	833
Q8BYI9	Tenascin-R	Tnr	0.842194	1	S	9.74304e-11	ITFTPS(0.155)S(0.842)GIS(0.002)S(0.001)EVTVPR	_ITFTPSS(ph)GISSEVTVPR_	2	929.453	724
P20357	Microtubule-associated protein 2	Map2	0.841325	3	S	1.23543e-08	VDHGAEIIT(0.259)QS(0.728)PS(0.235)RS(0.62)S(0.316)VAS(0.841)PR	_VDHGAEIITQS(ph)PSRS(ph)SVAS(ph)PR_	3	812.012	1791
E9Q8N8	Electrogenic sodium bicarbonate cotransporter 1	Slc4a4	0.840476	1	S	0.000568981	IS(0.084)ENY(0.072)S(0.84)DKS(0.003)DVENADESSSSILKPLISPAAER	_ISENYS(ph)DKSDVENADESSSSILKPLISPAAER_	3	1177.88	65
Q80V62	Fanconi anemia group D2 protein homolog	Fancd2	0.839495	1	S	0.0104608	DICPS(0.839)ILLLAQT(0.136)LFHS(0.024)QDQR	_DICPS(ph)ILLLAQTLFHSQDQR_	2	1189.58	432
Q810U3	Neurofascin	Nfasc	0.836057	3;4	S	0.000923816	DVPLGPEDPKEEDGS(0.836)FDY(0.575)S(0.593)DEDNKPLQGS(0.794)QT(0.407)S(0.761)LDGT(0.033)IK	_DVPLGPEDPKEEDGS(ph)FDYS(ph)DEDNKPLQGS(ph)QTS(ph)LDGTIK_	3	1481.59	1160
E9QK41	Actin-binding LIM protein 1	Ablim1	0.835947	1	S	0.00156127	S(0.836)S(0.164)GREEDEEELLR	_S(ph)SGREEDEEELLR_	2	814.844	670
E9Q2L2	Disks large homolog 2	Dlg2	0.835511	1	S	1.87666e-05	NLSQIENVHGYVLQS(0.164)HIS(0.836)PLK	_NLSQIENVHGYVLQSHIS(ph)PLK_	3	819.416	65
O88737	Protein bassoon	Bsn	0.835333	1	S	4.64682e-15	GYS(0.004)YFT(0.026)GS(0.835)S(0.134)PPLSPSTPSESPTFSPGK	_GYSYFTGS(ph)SPPLSPSTPSESPTFSPGK_	2	1421.63	1481
Q64010	Adapter molecule crk	Crk	0.834554	1	S	9.44749e-08	DS(0.018)S(0.835)T(0.147)S(0.001)PGDYVLSVSENSR	_DSS(ph)TSPGDYVLSVSENSR_	2	990.415	41
O88935	Synapsin-1	Syn1	0.83447	1	S	0.00127145	S(0.151)QS(0.834)LT(0.015)NAFNLPEPAPPRPSLSQDEVK	_SQS(ph)LTNAFNLPEPAPPRPSLSQDEVK_	3	968.138	666
P26645	Myristoylated alanine-rich C-kinase substrate	Marcks	0.834441	1	S	1.5624e-06	AEDGAAPS(0.834)PS(0.12)S(0.029)ET(0.017)PK	_AEDGAAPS(ph)PSSETPK_	2	762.317	138
Q8C7M3	E3 ubiquitin-protein ligase TRIM9	Trim9	0.83291	1	S	4.96642e-10	NILVQTPES(0.006)ES(0.833)PQS(0.161)R	_NILVQTPESES(ph)PQSR_	2	882.912	46
O88935	Synapsin-1	Syn1	0.831487	1	S	0.000148649	RLS(0.831)DS(0.169)NFMANLPNGYMTDLQR	_RLS(ph)DSNFMANLPNGYMTDLQR_	3	841.71	9
Q8BTI8	Serine/arginine repetitive matrix protein 2	Srrm2	0.830534	2	S	6.77865e-05	IHT(0.004)T(0.01)ALT(0.035)GQS(0.332)PPLAS(0.601)GHQGEGDAPS(0.018)VEPGAT(0.003)NIQQPS(0.126)S(0.831)PAPS(0.028)T(0.013)K	_IHTTALTGQSPPLAS(ph)GHQGEGDAPSVEPGATNIQQPSS(ph)PAPSTK_	4	1120.52	323
Q8VD37	SH3-containing GRB2-like protein 3-interacting protein 1	Sgip1	0.829923	2	T	3.4513e-06	T(0.157)VPAT(0.83)PPRT(0.494)GS(0.494)PLT(0.024)VATGNDQAATEAK	_TVPAT(ph)PPRT(ph)GSPLTVATGNDQAATEAK_	3	937.77	259
B2RUP2	Protein unc-13 homolog D	Unc13d	0.828729	1	Y	0.0324364	LALVY(0.829)CS(0.171)LIK	_LALVY(ph)CSLIK_	2	601.816	672
Q8VD37	SH3-containing GRB2-like protein 3-interacting protein 1	Sgip1	0.828617	2	S	2.73968e-11	LPPGKPGVGDVS(0.444)RPFS(0.555)PPIHS(0.007)S(0.165)S(0.829)PPPIAPLAR	_LPPGKPGVGDVSRPFS(ph)PPIHSSS(ph)PPPIAPLAR_	4	847.681	491
P70429	Ena/VASP-like protein	Evl	0.828472	1	S	0.00903719	S(0.172)NS(0.828)VEKPVSSLLSR	_SNS(ph)VEKPVSSLLSR_	2	791.895	329
Q9QYC0	Alpha-adducin	Add1	0.827405	2;3	T	4.06898e-11	EKS(0.91)PPDQS(0.135)AVPNT(0.813)PPS(0.315)T(0.827)PVKLEEDLPQEPTSR	_EKS(ph)PPDQSAVPNT(ph)PPST(ph)PVKLEEDLPQEPTSR_	3	1237.55	614
Q61165	Sodium/hydrogen exchanger 1	Slc9a1	0.826685	1	S	2.01561e-05	SKEPSSPGTDDVFTPGS(0.002)S(0.004)DS(0.827)PS(0.115)S(0.052)QR	_SKEPSSPGTDDVFTPGSSDS(ph)PSSQR_	3	878.04	790
Q569Z6	Thyroid hormone receptor-associated protein 3	Thrap3	0.826104	1;2	S	1.00691e-25	WAHDKFSGEEGEIEDDES(0.826)GT(0.174)ENREEK	_WAHDKFSGEEGEIEDDES(ph)GTENREEK_	4	776.566	935
A0A087WS83	Voltage-dependent R-type calcium channel subunit alpha-1E	Cacna1e	0.826078	2	S	2.72516e-07	FGEAVVVGRPGS(0.998)GDGDS(0.826)DQS(0.176)R	_FGEAVVVGRPGS(ph)GDGDS(ph)DQSR_	3	751.305	20
P16014	Secretogranin-1	Chgb	0.824959	1	S	1.15207e-66	WAS(0.175)S(0.825)REDAGAPVEDSQGQTK	_WASS(ph)REDAGAPVEDSQGQTK_	2	1099.97	100
P43274	Histone H1.4	Hist1h1e	0.823654	1	S	5.0757e-06	S(0.824)ET(0.176)APAAPAAPAPAEK	_(ac)S(ph)ETAPAAPAAPAPAEK_	2	800.866	2
B1AQX7	SRC kinase signaling inhibitor 1	Srcin1	0.821508	1	S	1.48191e-05	GEPDPERS(0.176)S(0.822)PPMLS(0.003)ADDAEYPR	_GEPDPERSS(ph)PPMLSADDAEYPR_	2	1248.52	47
Q9CY64	Biliverdin reductase A	Blvra	0.8213	1	S	0.000112897	S(0.179)GS(0.821)LEEVPNVGVNK	_SGS(ph)LEEVPNVGVNK_	2	754.853	236
F6QFD1	cAMP-specific 3',5'-cyclic phosphodiesterase 4D	Pde4d	0.820879	1	S	0.00580422	EWY(0.003)QS(0.067)T(0.067)IPQS(0.821)PS(0.043)PAPDDQEEGR	_EWYQSTIPQS(ph)PSPAPDDQEEGR_	3	866.366	661
Q9JMG7	Hepatoma-derived growth factor-related protein 3	Hdgfrp3	0.820661	2	S	3.98281e-05	FTGYQTIQQQS(0.038)S(0.038)S(0.038)ET(0.038)EGEGGNT(0.208)ADAS(0.821)S(0.821)EEEGDRVEDGK	_FTGYQTIQQQSSSETEGEGGNTADAS(ph)S(ph)EEEGDRVEDGK_	3	1395.22	121
Q9JMG7	Hepatoma-derived growth factor-related protein 3	Hdgfrp3	0.820661	2	S	3.98281e-05	FTGYQTIQQQS(0.038)S(0.038)S(0.038)ET(0.038)EGEGGNT(0.208)ADAS(0.821)S(0.821)EEEGDRVEDGK	_FTGYQTIQQQSSSETEGEGGNTADAS(ph)S(ph)EEEGDRVEDGK_	3	1395.22	122
S4R291	Ankyrin-2	Ank2	0.81834	1	S	0.0184231	TEWQPS(0.818)PT(0.182)DIPLQK	_TEWQPS(ph)PTDIPLQK_	2	860.403	3310
Q9D0L8	mRNA cap guanine-N7 methyltransferase	Rnmt	0.81824	1	S	4.9104e-34	EFGEDLVEQNSSYVQDS(0.818)PS(0.182)K	_EFGEDLVEQNSSYVQDS(ph)PSK_	2	1169.49	64
Q9Z140	Copine-6	Cpne6	0.818197	1	S	3.9061e-31	PSTPAMTPS(0.182)PS(0.818)P	_PSTPAMTPSPS(ph)P_	2	625.262	556
B9EHT4	CAP-Gly domain-containing linker protein 3	Clip3	0.818155	1	S	0.000607456	TKTDPAPMAPPPRGEEEEEEEEDEPVPEAPS(0.818)PT(0.182)QER	_TKTDPAPMAPPPRGEEEEEEEEDEPVPEAPS(ph)PTQER_	4	1020.94	32
Q8K3A9	7SK snRNA methylphosphate capping enzyme	Mepce	0.817835	2	S	2.84498e-06	ALNAET(1)PKS(0.182)S(0.818)PLPAK	_ALNAET(ph)PKSS(ph)PLPAK_	2	842.391	192
O35633	Vesicular inhibitory amino acid transporter	Slc32a1	0.817661	1	S	4.00585e-27	GGAPLPPS(0.182)GS(0.818)KDQAVGAGGEFGGHDKPK	_GGAPLPPSGS(ph)KDQAVGAGGEFGGHDKPK_	3	900.092	97
P14873	Microtubule-associated protein 1B	Map1b	0.816923	1	T	9.85202e-50	T(0.092)T(0.092)RT(0.817)PEEGGYSYEISEK	_TTRT(ph)PEEGGYSYEISEK_	2	1013.94	1945
P14873	Microtubule-associated protein 1B	Map1b	0.816287	2;3	S	1.33006e-14	TLEVVS(0.816)PS(0.18)QS(0.004)VTGSAGHTPYYQS(0.819)PT(0.181)DEK	_TLEVVS(ph)PSQSVTGSAGHTPYYQS(ph)PTDEK_	3	1042.45	1317
Q7TPB0	Lipid phosphate phosphatase-related protein type 3	Lppr3	0.815784	1	S	5.35988e-05	SVS(0.816)T(0.184)DELGPPGR	_SVS(ph)TDELGPPGR_	2	647.787	320
Q9CQ22	Ragulator complex protein LAMTOR1	Lamtor1	0.815262	1	T	5.48517e-11	KLLLDPS(0.09)S(0.09)T(0.815)PT(0.005)K	_KLLLDPSST(ph)PTK_	2	690.363	28
Q80TB8	Synaptic vesicle membrane protein VAT-1 homolog-like	Vat1l	0.815088	2	S	9.16041e-28	TPTPLMANDS(0.815)T(0.188)ET(0.541)S(0.455)EAGEEEEDHEGDSENK	_TPTPLMANDS(ph)TET(ph)SEAGEEEEDHEGDSENK_	3	1137.09	390
A2A543	Voltage-dependent L-type calcium channel subunit beta-1	Cacnb1	0.814561	1	T	0.00118936	AT(0.009)HPPS(0.03)S(0.146)T(0.815)PPNPLLNR	_ATHPPSST(ph)PPNPLLNR_	2	889.933	418
S4R1C4			0.814283	1;2	S	1.80318e-95	RQS(0.148)S(0.633)VT(0.138)S(0.081)QSQDVASLS(0.089)S(0.814)PS(0.097)R	_RQSS(ph)VTSQSQDVASLSS(ph)PSR_	3	756.328	1130
P20357	Microtubule-associated protein 2	Map2	0.813474	2	S	1.94837e-18	AS(0.187)QPS(0.813)PPAQEAGYSTLAQSYTPDHPSELPEEPS(0.131)S(0.869)PQER	_ASQPS(ph)PPAQEAGYSTLAQSYTPDHPSELPEEPSS(ph)PQER_	3	1409.27	626
P23242	Gap junction alpha-1 protein	Gja1	0.8134	1	S	0.0321493	AS(0.187)S(0.813)RPRPDDLEI	_ASS(ph)RPRPDDLEI_	2	718.332	373
Q69ZR2	E3 ubiquitin-protein ligase HECTD1	Hectd1	0.812785	1	S	2.03841e-10	VSALAGPS(0.185)S(0.813)DDENEEES(0.003)KPEKEDEPQEDAK	_VSALAGPSS(ph)DDENEEESKPEKEDEPQEDAK_	3	1113.8	633
Q9Z2H5	Band 4.1-like protein 1	Epb41l1	0.81263	1	S	2.23922e-10	HLT(0.002)QQDT(0.186)RPAEQS(0.813)LDMDDKDYSEADGLSER	_HLTQQDTRPAEQS(ph)LDMDDKDYSEADGLSER_	4	883.381	60
A0A087WSJ2	Calcium-activated potassium channel subunit alpha-1	Kcnma1	0.811366	1;2	S	2.69568e-05	S(0.189)S(0.811)PDNSPVHGMLR	_SS(ph)PDNSPVHGMLR_	2	738.819	924
E9PZY8	Protein virilizer homolog	1110037F02Rik	0.811098	1	S	5.27088e-07	SFLSEPS(0.189)S(0.811)PGR	_SFLSEPSS(ph)PGR_	2	622.271	1628
O88587	Catechol O-methyltransferase	Comt	0.810347	1	S	7.53168e-05	AVYQGPGS(0.163)S(0.81)PVKS(0.027)	_AVYQGPGSS(ph)PVKS_	2	678.813	261
Q03517	Secretogranin-2	Scg2	0.809506	1	S	3.34866e-13	VPS(0.139)PVS(0.81)S(0.051)EDDLQEEEQLEQAIK	_VPSPVS(ph)SEDDLQEEEQLEQAIK_	3	850.721	532
E9PWN0	Phosphatidate phosphatase LPIN2	Lpin2	0.806956	1	S	1.62302e-06	S(0.807)DS(0.193)ELEVKPSESLLR	_S(ph)DSELEVKPSESLLR_	2	884.922	281
E9QAD8		Iqsec2	0.806757	1	S	0.00314371	T(0.168)VS(0.807)VEGDAPGS(0.017)DLS(0.004)T(0.004)AVDSPGSQPPYR	_TVS(ph)VEGDAPGSDLSTAVDSPGSQPPYR_	3	923.747	246
Q810U3	Neurofascin	Nfasc	0.805737	4	S	0.0320312	DVPLGPEDPKEEDGS(0.388)FDY(0.794)S(0.806)DEDNKPLQGS(0.617)QT(0.531)S(0.819)LDGT(0.045)IK	_DVPLGPEDPKEEDGSFDY(ph)S(ph)DEDNKPLQGS(ph)QTS(ph)LDGTIK_	4	1111.44	1164
Q61609	Sodium-dependent phosphate transporter 1	Slc20a1	0.805375	2	S	1.19443e-08	EVKS(0.195)S(0.805)PS(0.657)ES(0.343)PLMEK	_EVKSS(ph)PS(ph)ESPLMEK_	2	854.351	269
Q8K3X4	Interferon regulatory factor 2-binding protein-like	Irf2bpl	0.804772	3	S	0.00214965	RNS(0.791)S(0.406)S(0.805)PVS(0.97)PAS(0.028)VPGQR	_RNS(ph)SS(ph)PVS(ph)PASVPGQR_	2	933.371	638
Q9QXV0	ProSAAS	Pcsk1n	0.804378	1	S	0.000487326	ILT(0.015)GS(0.804)S(0.181)EPEAAPAPR	_ILTGS(ph)SEPEAAPAPR_	2	788.374	204
Q9Z2H5	Band 4.1-like protein 1	Epb41l1	0.801887	1	S	0.00264839	HLTQQDT(0.001)RPAEQS(0.001)LDMDDKDY(0.002)S(0.195)EADGLS(0.802)ER	_HLTQQDTRPAEQSLDMDDKDYSEADGLS(ph)ER_	4	883.381	75
Q5XG69	Protein FAM169A	Fam169a	0.801335	1;2	S	2.85567e-07	AVDS(0.909)S(0.801)S(0.29)EEIEVEVPVVDRR	_AVDS(ph)S(ph)SEEIEVEVPVVDRR_	3	759.001	631
P35486	Pyruvate dehydrogenase E1 component subunit alpha, somatic form, mitochondrial	Pdha1	0.800267	1	S	0.00488486	YGMGT(0.2)S(0.8)VER	_YGMGTS(ph)VER_	2	540.215	232
Q8BTI8	Serine/arginine repetitive matrix protein 2	Srrm2	0.799266	1	S	7.71516e-05	VS(0.201)S(0.799)PVLETVQQR	_VSS(ph)PVLETVQQR_	2	711.853	1360
P42669	Transcriptional activator protein Pur-alpha	Pura	0.798129	1	S	7.8634e-07	DS(0.798)GS(0.202)EQGGAALGSGGSLGHPGSGSGSGGGGGGGGGGGGSGGGGGAPGGLQHETQELASK	_DS(ph)GSEQGGAALGSGGSLGHPGSGSGSGGGGGGGGGGGGSGGGGGAPGGLQHETQELASK_	4	1214.77	6
Q6DFZ1		Gbf1	0.795876	1	S	0.00913755	GY(0.002)T(0.061)S(0.796)DS(0.138)EVY(0.001)T(0.002)DHGRPGK	_GYTS(ph)DSEVYTDHGRPGK_	3	650.274	1318
Q6ZWQ0	Nesprin-2	Syne2	0.795628	1	S	0.0031293	LTSHT(0.001)PGLDDEKEAS(0.796)ENET(0.203)DIEDPR	_LTSHTPGLDDEKEAS(ph)ENETDIEDPR_	3	960.08	6348
Q9EPR4	Solute carrier family 23 member 2	Slc23a2	0.795158	2	S	7.40327e-16	SSLAET(0.001)LDS(0.795)T(0.205)GS(0.999)LDPQR	_SSLAETLDS(ph)TGS(ph)LDPQR_	2	968.9	78
Q810U3	Neurofascin	Nfasc	0.794449	4	S	0.000923816	DVPLGPEDPKEEDGS(0.836)FDY(0.575)S(0.593)DEDNKPLQGS(0.794)QT(0.407)S(0.761)LDGT(0.033)IK	_DVPLGPEDPKEEDGS(ph)FDYS(ph)DEDNKPLQGS(ph)QTS(ph)LDGTIK_	3	1481.59	1174
Q810U3	Neurofascin	Nfasc	0.794105	3;4	Y	0.000923816	DVPLGPEDPKEEDGS(0.388)FDY(0.794)S(0.806)DEDNKPLQGS(0.617)QT(0.531)S(0.819)LDGT(0.045)IK	_DVPLGPEDPKEEDGSFDY(ph)S(ph)DEDNKPLQGS(ph)QTS(ph)LDGTIK_	4	1111.44	1163
A3KGU7	Spectrin alpha chain, brain	Spna2	0.793745	1	S	4.83412e-25	KLDPAQS(0.206)AS(0.794)RENLLEEQGSIALR	_KLDPAQSAS(ph)RENLLEEQGSIALR_	3	869.104	1031
G3UWG2	T-lymphoma invasion and metastasis-inducing protein 1	Tiam1	0.793631	1	S	8.71897e-37	FTIDSDAISAS(0.206)S(0.794)PEKEPQQPAGGGDTDR	_FTIDSDAISASS(ph)PEKEPQQPAGGGDTDR_	3	986.1	1466
P14873	Microtubule-associated protein 1B	Map1b	0.793498	1	S	2.40836e-47	ATVVVEATEPEPSGSIGNPAAS(0.019)T(0.102)S(0.793)PS(0.072)LS(0.013)HR	_(ac)ATVVVEATEPEPSGSIGNPAASTS(ph)PSLSHR_	3	1024.15	25
E9PUI5	Formin-binding protein 1-like	Fnbp1l	0.793437	2	S	0.00143472	RHS(0.793)S(0.207)DINHLVT(0.533)QGRES(0.369)PEGS(0.027)Y(0.065)T(0.006)DDANQEVR	_RHS(ph)SDINHLVT(ph)QGRESPEGSYTDDANQEVR_	4	890.132	488
Q6ZPQ6	Membrane-associated phosphatidylinositol transfer protein 2	Pitpnm2	0.792173	2	S	0.0410255	GAS(0.94)PS(0.107)RHS(0.792)IS(0.161)EWR	_GAS(ph)PSRHS(ph)ISEWR_	2	815.332	321
P68181	cAMP-dependent protein kinase catalytic subunit beta	Prkacb	0.791341	1	S	5.97819e-18	GSGDTSNFDDYEEEEIRVS(0.791)IT(0.209)EK	_GSGDTSNFDDYEEEEIRVS(ph)ITEK_	3	900.711	339
Q8K3X4	Interferon regulatory factor 2-binding protein-like	Irf2bpl	0.791011	3	S	0.00214965	RNS(0.791)S(0.406)S(0.805)PVS(0.97)PAS(0.028)VPGQR	_RNS(ph)SS(ph)PVS(ph)PASVPGQR_	2	933.371	636
Q8C9H6	Protein FAM40B	Fam40b	0.790375	1	S	0.000105588	AAS(0.79)PPS(0.201)YT(0.009)LDLGESQLAPPPSK	_AAS(ph)PPSYTLDLGESQLAPPPSK_	3	769.37	328
Q9Z1B3	1-phosphatidylinositol 4,5-bisphosphate phosphodiesterase beta-1	Plcb1	0.789598	1	S	2.4165e-21	KS(0.007)EPS(0.18)S(0.79)PDHGS(0.018)S(0.005)AIEQDLAALDAEMTQK	_KSEPSS(ph)PDHGSSAIEQDLAALDAEMTQK_	3	1008.12	982
P62908	40S ribosomal protein S3	Rps3	0.786295	1	T	8.96585e-05	DEILPT(0.199)T(0.786)PIS(0.014)EQK	_DEILPTT(ph)PISEQK_	2	775.871	221
Q9Z2H5	Band 4.1-like protein 1	Epb41l1	0.785111	1	S	0.00215312	SLDGAEFS(0.046)RPAS(0.169)VS(0.785)ENHDAGPEGDKR	_SLDGAEFSRPASVS(ph)ENHDAGPEGDKR_	4	702.811	443
P43277	Histone H1.3	Hist1h1d	0.784803	1	S	2.6028e-06	S(0.785)ET(0.215)APAAPAAPAPVEK	_(ac)S(ph)ETAPAAPAAPAPVEK_	2	814.882	2
Q61036	Serine/threonine-protein kinase PAK 3	Pak3	0.783371	1	S	1.16212e-09	S(0.217)DS(0.783)LDNEEKPPAPPLR	_(ac)SDS(ph)LDNEEKPPAPPLR_	2	943.93	4
A2RSJ4	UHRF1-binding protein 1-like	Uhrf1bp1l	0.781448	2	S	6.88766e-08	NLGS(1)PPKS(0.781)PT(0.217)HAS(0.001)PQHTQTEK	_NLGS(ph)PPKS(ph)PTHASPQHTQTEK_	3	801.356	418
Q7TQG1	Pleckstrin homology domain-containing family A member 6	Plekha6	0.780868	1	S	4.59488e-07	T(0.219)KS(0.781)PAEEELTPSAVVR	_TKS(ph)PAEEELTPSAVVR_	3	598.628	901
A2A5Y6	Microtubule-associated protein	Mapt	0.779958	2;3	S	5.7933e-71	TDHGAEIVYKS(1)PVVSGDT(0.22)S(0.78)PR	_TDHGAEIVYKS(ph)PVVSGDTS(ph)PR_	2	1188.02	712
Q8K221	Arfaptin-2	Arfip2	0.779808	1	T	5.80053e-29	HPSHST(0.78)S(0.219)PS(0.001)GPGDEVAR	_HPSHST(ph)SPSGPGDEVAR_	2	899.381	75
A2AJA9	Uncharacterized protein C9orf172 homolog	Gm996	0.779082	1	S	0.0176613	RPPVVVNLS(0.005)T(0.216)S(0.779)PR	_RPPVVVNLSTS(ph)PR_	2	751.398	499
O08582	GTP-binding protein 1	Gtpbp1	0.778019	1;2	S	1.85578e-05	S(0.205)RS(0.778)PVDS(0.016)PVPASMFAPEPSSPGAAR	_SRS(ph)PVDSPVPASMFAPEPSSPGAAR_	3	859.732	8
Q00PI9	Heterogeneous nuclear ribonucleoprotein U-like protein 2	Hnrnpul2	0.775448	1	S	1.14791e-07	S(0.217)KS(0.775)PPPPEEEAKDEEEDQT(0.007)LVNLDTYTSDLHFQISK	_SKS(ph)PPPPEEEAKDEEEDQTLVNLDTYTSDLHFQISK_	4	1049.98	226
Q8BFT9	Synaptic vesicle 2-related protein	Svop	0.775439	1;2	S	4.57283e-12	T(0.121)GES(0.104)ARS(0.775)EDDAASGEHDIQIEGVR	_TGESARS(ph)EDDAASGEHDIQIEGVR_	3	870.375	25
Q9EPN1	Neurobeachin	Nbea	0.774896	2	S	1.85244e-09	AVPNVDAGS(0.048)IIS(0.775)DT(0.213)ERS(0.962)DDGKES(0.002)GK	_AVPNVDAGSIIS(ph)DTERS(ph)DDGKESGK_	3	903.055	1252
Q52KI8	Serine/arginine repetitive matrix protein 1	Srrm1	0.773196	3	S	0.016167	KPPAPPS(0.98)PVQS(0.111)QS(0.773)PS(0.201)T(0.184)NWS(0.751)PAVPAK	_KPPAPPS(ph)PVQSQS(ph)PSTNWS(ph)PAVPAK_	3	932.413	816
P06837	Neuromodulin	Gap43	0.77307	1;2	S	1.06993e-09	AAQPPT(0.018)ET(0.253)AES(0.956)S(0.773)QAEEEKDAVDEAKPK	_AAQPPTETAES(ph)S(ph)QAEEEKDAVDEAKPK_	3	1006.1	193
B2RW11		Ankrd34a	0.772349	1	S	2.62987e-07	RHS(0.772)T(0.228)EGPEDPPPWAEK	_RHS(ph)TEGPEDPPPWAEK_	2	956.915	290
Q8K212	Phosphofurin acidic cluster sorting protein 1	Pacs1	0.771659	2	S	0.0343334	T(0.039)NS(0.772)S(0.368)DS(0.406)ERS(0.406)PDLGHS(0.007)T(0.002)QIPR	_TNS(ph)SDS(ph)ERSPDLGHSTQIPR_	3	781.992	526
P09023	Homeobox protein Hox-B6	Hoxb6	0.770912	3	S	0.0122259	KES(0.714)KLLS(0.771)AS(0.771)QLS(0.744)AEEEEEK	_KESKLLS(ph)AS(ph)QLS(ph)AEEEEEK_	2	1187.99	209
P09023	Homeobox protein Hox-B6	Hoxb6	0.770912	3	S	0.0122259	KES(0.714)KLLS(0.771)AS(0.771)QLS(0.744)AEEEEEK	_KESKLLS(ph)AS(ph)QLS(ph)AEEEEEK_	2	1187.99	211
P28028	Serine/threonine-protein kinase B-raf	Braf	0.770508	1	S	1.19279e-20	S(0.115)S(0.115)S(0.771)APNVHINTIEPVNIDEK	_SSS(ph)APNVHINTIEPVNIDEK_	2	1122.53	348
E9QM90	LisH domain and HEAT repeat-containing protein KIAA1468	2310035C23Rik	0.767275	1	S	1.16604e-07	NYKS(0.233)S(0.767)PEIQEPIKPLEK	_NYKSS(ph)PEIQEPIKPLEK_	3	694.017	244
Q68FH0	Plakophilin-4	Pkp4	0.762971	2;3	S	8.1398e-13	LQHTGPADDGAT(0.245)RS(0.763)PS(0.988)IDS(0.005)IQKDPR	_LQHTGPADDGATRS(ph)PS(ph)IDSIQKDPR_	3	941.422	509
F7BJK1		Pcdh1	0.761295	1	S	0.000167001	SNSPLPS(0.005)IQLQPQS(0.761)PS(0.163)AS(0.071)KK	_SNSPLPSIQLQPQS(ph)PSASKK_	3	725.367	823
O35927	Catenin delta-2	Ctnnd2	0.760751	2	S	3.2019e-06	T(0.002)PS(0.238)IS(0.761)PVRVS(1)PNNR	_TPSIS(ph)PVRVS(ph)PNNR_	2	842.384	1082
S4R291	Ankyrin-2	Ank2	0.76058	3	S	0.000248321	VQPPS(0.069)PLPS(0.17)S(0.472)IDS(0.761)NS(0.761)S(0.761)PEEAT(0.007)QFQPIVPK	_VQPPSPLPSSIDS(ph)NS(ph)S(ph)PEEATQFQPIVPK_	3	1106.15	2656
S4R291	Ankyrin-2	Ank2	0.76058	3	S	0.000248321	VQPPS(0.069)PLPS(0.17)S(0.472)IDS(0.761)NS(0.761)S(0.761)PEEAT(0.007)QFQPIVPK	_VQPPSPLPSSIDS(ph)NS(ph)S(ph)PEEATQFQPIVPK_	3	1106.15	2658
S4R291	Ankyrin-2	Ank2	0.76058	3	S	0.000248321	VQPPS(0.069)PLPS(0.17)S(0.472)IDS(0.761)NS(0.761)S(0.761)PEEAT(0.007)QFQPIVPK	_VQPPSPLPSSIDS(ph)NS(ph)S(ph)PEEATQFQPIVPK_	3	1106.15	2659
Q62318	Transcription intermediary factor 1-beta	Trim28	0.760528	2	S	0.000124393	AASAAATAAAS(0.001)AAT(0.001)AAS(0.001)AAS(0.079)GS(0.909)PGS(0.761)GEGS(0.248)AGGEK	_(ac)AASAAATAAASAATAASAASGS(ph)PGS(ph)GEGSAGGEK_	3	975.071	26
Q80W04	Transmembrane and coiled-coil domains protein 2	Tmcc2	0.760432	1	S	1.02774e-06	EREHQASQEAQQQQQQQGLS(0.24)DQDS(0.76)PDEKER	_EREHQASQEAQQQQQQQGLSDQDS(ph)PDEKER_	4	905.143	119
Q8C0M0	WD repeat-containing protein 59	Wdr59	0.759237	1	S	0.0118778	ETEHIS(0.001)S(0.001)PWGES(0.239)S(0.759)PEELR	_ETEHISSPWGESS(ph)PEELR_	3	717.307	840
Q64127	Transcription intermediary factor 1-alpha	Trim24	0.759207	1	S	0.0109038	SEWS(0.014)DAS(0.226)QKS(0.759)PVHVGETR	_SEWSDASQKS(ph)PVHVGETR_	3	693.976	812
A2AJA9	Uncharacterized protein C9orf172 homolog	Gm996	0.758281	1	S	8.30711e-11	ASQGLAT(0.242)APAS(0.758)PPVLQR	_ASQGLATAPAS(ph)PPVLQR_	2	872.443	109
Q8VD37	SH3-containing GRB2-like protein 3-interacting protein 1	Sgip1	0.756008	1	S	7.11369e-33	VAEQTFIKDDYLETLS(0.756)S(0.244)PK	_VAEQTFIKDDYLETLS(ph)SPK_	2	1132.54	397
E9Q784		Zc3h13	0.754429	1	S	0.0349379	S(0.229)LS(0.754)PS(0.017)HLTEDR	_SLS(ph)PSHLTEDR_	2	661.293	953
O88737	Protein bassoon	Bsn	0.750979	1	S	4.10929e-12	SRGEHSSTLPASTPSYTSGTSPTSLSSLEEDSDS(0.069)S(0.751)PS(0.179)R	_SRGEHSSTLPASTPSYTSGTSPTSLSSLEEDSDSS(ph)PSR_	4	991.936	1019
Q52KI8	Serine/arginine repetitive matrix protein 1	Srrm1	0.750529	3	S	0.016167	KPPAPPS(0.98)PVQS(0.111)QS(0.773)PS(0.201)T(0.184)NWS(0.751)PAVPAK	_KPPAPPS(ph)PVQSQS(ph)PSTNWS(ph)PAVPAK_	3	932.413	822
E9QNZ2	E3 ubiquitin-protein ligase DZIP3	Dzip3	0.749534	1	S	3.30166e-05	SAQDGNNAS(0.75)PS(0.195)HT(0.052)AS(0.004)QPNAPQDPK	_SAQDGNNAS(ph)PSHTASQPNAPQDPK_	3	833.689	1105
P26645	Myristoylated alanine-rich C-kinase substrate	Marcks	0.748553	1	S	3.99325e-17	GEATAERPGEAAVAS(0.126)S(0.749)PS(0.126)K	_GEATAERPGEAAVASS(ph)PSK_	3	632.29	27
A2A5Y6	Microtubule-associated protein	Mapt	0.74854	2;3	T	5.78929e-71	TDHGAEIVYKS(1)PVVS(1)GDT(0.749)S(0.252)PR	_TDHGAEIVYKS(ph)PVVS(ph)GDT(ph)SPR_	2	1228	711
E9Q4K0	Actin-binding LIM protein 2	Ablim2	0.748155	1	S	0.00510586	T(0.212)NS(0.748)PDLDS(0.011)QS(0.012)LS(0.012)LS(0.003)S(0.001)GTDQEPLQR	_TNS(ph)PDLDSQSLSLSSGTDQEPLQR_	3	885.731	529
P68181	cAMP-dependent protein kinase catalytic subunit beta	Prkacb	0.748004	1	S	0.000267089	FRGS(0.748)GDT(0.197)S(0.055)NFDDYEEEEIR	_FRGS(ph)GDTSNFDDYEEEEIR_	3	782.645	322
S4R291	Ankyrin-2	Ank2	0.747348	1	S	0.00438428	AT(0.253)S(0.747)PLIEETPIGSIK	_ATS(ph)PLIEETPIGSIK_	2	818.416	1722
A2A5R2		Arfgef2	0.746238	1	S	0.00878481	QS(0.002)LS(0.252)S(0.746)ADNLEPDVQGHQVAAR	_QSLSS(ph)ADNLEPDVQGHQVAAR_	3	768.02	356
P09023	Homeobox protein Hox-B6	Hoxb6	0.744191	3	S	0.0122259	KES(0.714)KLLS(0.771)AS(0.771)QLS(0.744)AEEEEEK	_KESKLLS(ph)AS(ph)QLS(ph)AEEEEEK_	2	1187.99	214
Q9EPN1	Neurobeachin	Nbea	0.743331	1	S	0.000846799	EIEDLS(0.027)QS(0.217)QS(0.743)PES(0.008)ET(0.003)DY(0.001)PVSTDTR	_EIEDLSQSQS(ph)PESETDYPVSTDTR_	3	931.726	1001
P70663	SPARC-like protein 1	Sparcl1	0.741839	2	S	1.36779e-05	AEKPS(0.045)ALNS(0.872)EEET(0.117)HEQS(0.742)T(0.224)EQDK	_AEKPSALNS(ph)EEETHEQS(ph)TEQDK_	3	883.02	78
Q91YM2	Rho GTPase-activating protein 35	Arhgap35	0.739499	1	Y	6.6801e-08	NEEENIY(0.739)S(0.26)VPHDSTQGK	_NEEENIY(ph)SVPHDSTQGK_	3	676.285	1105
B1AR17		Chd3	0.739125	1	S	1.83624e-11	ELQGDGPPS(0.056)S(0.739)PT(0.202)NDPT(0.003)VK	_ELQGDGPPSS(ph)PTNDPTVK_	2	959.925	765
A2AN08	E3 ubiquitin-protein ligase UBR4	Ubr4	0.738752	1;3	S	0.0019792	HVT(0.045)LPS(0.739)S(0.739)PRS(0.739)NT(0.739)PMGDKDDDDDDDADEK	_HVTLPS(ph)S(ph)PRS(ph)NTPMGDKDDDDDDDADEK_	3	1104.74	2715
A2AN08	E3 ubiquitin-protein ligase UBR4	Ubr4	0.738752	1;3	S	0.0019792	HVT(0.045)LPS(0.739)S(0.739)PRS(0.739)NT(0.739)PMGDKDDDDDDDADEK	_HVTLPS(ph)S(ph)PRS(ph)NTPMGDKDDDDDDDADEK_	3	1104.74	2716
A2AN08	E3 ubiquitin-protein ligase UBR4	Ubr4	0.738752	3	S	0.0450881	HVT(0.045)LPS(0.739)S(0.739)PRS(0.739)NT(0.739)PMGDKDDDDDDDADEK	_HVTLPS(ph)S(ph)PRS(ph)NTPMGDKDDDDDDDADEK_	3	1104.74	2719
Q9QYB5	Gamma-adducin	Add3	0.736508	2	S	3.83422e-38	TEEVLS(0.737)PDGS(0.262)PS(0.032)KS(0.969)PS(0.001)K	_TEEVLS(ph)PDGSPSKS(ph)PSK_	2	952.9	673
Z4YJR7	Sorbin and SH3 domain-containing protein 2	Sorbs2	0.736173	1	S	2.4925e-21	GLLHGWS(0.001)QS(0.197)S(0.736)T(0.066)EEVPR	_GLLHGWSQSS(ph)TEEVPR_	3	621.619	476
Q8K212	Phosphofurin acidic cluster sorting protein 1	Pacs1	0.735449	2	S	0.0190755	T(0.008)NS(0.194)S(0.735)DS(0.53)ERS(0.53)PDLGHS(0.001)TQIPR	_TNSS(ph)DS(ph)ERSPDLGHSTQIPR_	3	781.992	527
E9Q2W8	Loss of heterozygosity 12 chromosomal region 1 protein homolog	Loh12cr1	0.733853	1	S	1.89566e-05	GLLSGQT(0.059)S(0.734)PT(0.207)NAK	_GLLSGQTS(ph)PTNAK_	2	677.324	76
P98191	Phosphatidate cytidylyltransferase 1	Cds1	0.732851	2	S	8.02309e-27	EGEAAGGDHET(0.262)ES(0.733)T(0.041)S(0.963)DKET(0.001)DIDDR	_EGEAAGGDHETES(ph)TS(ph)DKETDIDDR_	3	908.666	35
F8WGF2	Nitric oxide synthase, brain	Nos1	0.729789	1	S	2.73209e-10	GNVPVVLNNPYSENEQS(0.006)PAS(0.075)GKQS(0.73)PT(0.189)K	_GNVPVVLNNPYSENEQSPASGKQS(ph)PTK_	3	974.461	287
E9PUL5	Proline-rich transmembrane protein 2	Prrt2	0.728895	1;2	S	7.9562e-27	AELAPET(0.022)T(0.119)ET(0.715)PVET(0.139)PET(0.005)VQATDLS(0.001)LNPEEGS(0.118)KAS(0.729)PS(0.123)PS(0.025)PS(0.005)EAR	_AELAPETTET(ph)PVETPETVQATDLSLNPEEGSKAS(ph)PSPSPSEAR_	4	1153.27	98
F8WHW6	Phosphatidylinositol 4-phosphate 5-kinase type-1 gamma	Pip5k1c	0.727645	1	T	4.60123e-07	T(0.728)QS(0.244)S(0.028)GQDGRPQEEPHAEDLQK	_T(ph)QSSGQDGRPQEEPHAEDLQK_	2	1209.02	552
Q9QYB8	Beta-adducin	Add2	0.725809	4	S	2.65856e-05	DIAT(0.144)EKPGS(0.843)PVKS(0.35)T(0.681)PAS(0.981)PVQS(0.726)PS(0.274)K	_DIATEKPGS(ph)PVKST(ph)PAS(ph)PVQS(ph)PSK_	3	910.049	606
O54991	Contactin-associated protein 1	Cntnap1	0.725538	1	S	1.21896e-08	DQNLPQILEES(0.274)RS(0.726)E	_DQNLPQILEESRS(ph)E_	2	869.388	1384
Q99LG1	Transmembrane protein 51	Tmem51	0.723066	1	S	1.62296e-18	IQQQAGTVPHS(0.277)QEEDS(0.723)QEEEEDVSSR	_IQQQAGTVPHSQEEDS(ph)QEEEEDVSSR_	3	1008.09	114
P26339	Chromogranin-A	Chga	0.723006	2	S	0.00592243	GWRPS(0.723)S(0.278)REDS(0.999)VEAR	_GWRPS(ph)SREDS(ph)VEAR_	2	896.364	409
E9Q7G0		Numa1	0.722036	1	S	0.0424836	ISQLS(0.722)EENGDLS(0.278)FK	_ISQLS(ph)EENGDLSFK_	2	823.869	315
Q8K2L8	Trafficking protein particle complex subunit 12	Trappc12	0.720668	2	S	0.00221035	LPS(0.002)S(0.002)T(0.002)DKEVVDT(0.086)LS(0.908)NGS(0.721)ET(0.276)DGDDT(0.004)PR	_LPSSTDKEVVDTLS(ph)NGS(ph)ETDGDDTPR_	3	965.732	128
E9QLZ9	Protein enabled homolog	Enah	0.720346	1	S	0.00252941	NS(0.071)RPS(0.207)S(0.72)PVNT(0.001)PSSQPPAAK	_NSRPSS(ph)PVNTPSSQPPAAK_	3	667.985	355
E0CXB9	Catenin alpha-2	Ctnna2	0.718703	2	S	1.36178e-32	S(0.719)RT(0.305)S(0.977)VQTEDDQLIAGQSAR	_S(ph)RTS(ph)VQTEDDQLIAGQSAR_	2	1111.48	664
E0CXB9	Catenin alpha-2	Ctnna2	0.718617	1;2;3	T	1.89205e-24	S(0.371)RT(0.719)S(0.911)VQT(1)EDDQLIAGQSAR	_SRT(ph)S(ph)VQT(ph)EDDQLIAGQSAR_	3	767.976	666
Q9QXS1	Plectin	Plec	0.718209	1	S	8.22356e-05	S(0.141)S(0.141)S(0.718)VGSSSSYPISSAGPR	_SSS(ph)VGSSSSYPISSAGPR_	2	896.891	4393
Q6ZQ18	Protein EFR3 homolog B	Efr3b	0.717718	1	S	0.0073851	S(0.282)PS(0.718)PLQAPEKEKENPAELAER	_SPS(ph)PLQAPEKEKENPAELAER_	3	800.72	216
O08530	Sphingosine 1-phosphate receptor 1	S1pr1	0.71529	1	S	1.03874e-14	S(0.133)KS(0.715)DNS(0.064)S(0.088)HPQKDDGDNPETIMSSGNVNSSS	_SKS(ph)DNSSHPQKDDGDNPETIMSSGNVNSSS_	3	1067.77	355
B2RUG9	Adenomatous polyposis coli protein	Apc	0.715164	1	S	0.00524392	YSDEQLNS(0.211)GRQS(0.715)PS(0.074)QNER	_YSDEQLNSGRQS(ph)PSQNER_	3	725.641	1040
Q91XV3	Brain acid soluble protein 1	Basp1	0.714726	1	S	2.41894e-07	ESEPQAAADATEVKES(0.715)T(0.285)EEKPK	_ESEPQAAADATEVKES(ph)TEEKPK_	3	818.702	54
E9Q5W5	Zinc finger ZZ-type and EF-hand domain-containing protein 1	Zzef1	0.713007	1	S	5.28838e-18	GDQEEELDRPVS(0.287)S(0.713)PGEAEQK	_GDQEEELDRPVSS(ph)PGEAEQK_	3	760.66	2407
E9Q0J5	Kinesin-like protein KIF21A	Kif21a	0.712974	2	S	0.00279901	HSDS(0.003)GAS(0.038)ET(0.05)S(0.197)LS(0.713)PPS(0.491)S(0.491)PPS(0.017)RPR	_HSDSGASETSLS(ph)PPS(ph)SPPSRPR_	3	799.335	1273
P20357	Microtubule-associated protein 2	Map2	0.711714	1;2	S	0.000568185	DQPAALPLAAEET(0.036)ANLPPS(0.712)PPPS(0.712)PAS(0.364)EQT(0.154)AT(0.023)VEEDLLTASK	_DQPAALPLAAEETANLPPS(ph)PPPS(ph)PASEQTATVEEDLLTASK_	4	1079.26	136
P20357	Microtubule-associated protein 2	Map2	0.711714	2	S	0.000568185	DQPAALPLAAEET(0.036)ANLPPS(0.712)PPPS(0.712)PAS(0.364)EQT(0.154)AT(0.023)VEEDLLTASK	_DQPAALPLAAEETANLPPS(ph)PPPS(ph)PASEQTATVEEDLLTASK_	4	1079.26	140
P97291	Cadherin-8	Cdh8	0.711712	1	S	0.000395869	LGELYSVGES(0.712)DKET(0.288)	_LGELYSVGES(ph)DKET_	2	803.848	795
Q64685	Beta-galactoside alpha-2,6-sialyltransferase 1	St6gal1	0.709992	2	S	0.0484241	DS(0.004)T(0.71)Y(0.576)S(0.71)KLNPR	_DST(ph)YS(ph)KLNPR_	2	670.768	100
Q8VDM4	26S proteasome non-ATPase regulatory subunit 2	Psmd2	0.709116	1	T	5.29369e-07	DKTPVQSQQPSAT(0.254)T(0.709)PS(0.036)GADEK	_DKTPVQSQQPSATT(ph)PSGADEK_	3	751.341	20
A2ARP8	Microtubule-associated protein 1A	Mtap1a	0.708995	1	S	5.30312e-25	SPFEIIS(0.709)PPAS(0.291)PPEMTGQR	_SPFEIIS(ph)PPASPPEMTGQR_	2	1060.99	2006
A6PWD2	Forkhead-associated domain-containing protein 1	Fhad1	0.706563	2	S	0.0415588	QHS(0.707)QT(0.707)IVS(0.587)LEER	_QHS(ph)QT(ph)IVSLEER_	2	793.834	905
D3Z6G3		Mapre3	0.70519	1	S	1.34508e-17	QGQDVAPPPNPVPQRT(0.147)S(0.705)PT(0.147)GPK	_QGQDVAPPPNPVPQRTS(ph)PTGPK_	3	783.385	147
K3W4S4	C-Jun-amino-terminal kinase-interacting protein 3	Mapk8ip3	0.700338	1	S	0.0125447	LFS(0.001)S(0.006)S(0.071)S(0.222)S(0.7)PPPAK	_LFSSSSS(ph)PPPAK_	2	642.797	594
O88737	Protein bassoon	Bsn	0.699599	1;4	S	3.18895e-05	S(0.999)KT(0.997)PPS(0.7)NLS(0.305)PIEDAS(0.964)PT(0.036)EELR	_S(ph)KT(ph)PPS(ph)NLSPIEDAS(ph)PTEELR_	3	863.338	1105
E9PUL5	Proline-rich transmembrane protein 2	Prrt2	0.699375	1	S	1.18036e-36	QENGAVVPLQAGDGEEGPAPQPHS(0.699)PPS(0.15)T(0.15)K	_QENGAVVPLQAGDGEEGPAPQPHS(ph)PPSTK_	3	992.124	208
Q8JZQ9	Eukaryotic translation initiation factor 3 subunit B	Eif3b	0.698013	2	S	0.00329082	AKPAAQS(0.698)EEET(0.361)AT(0.466)S(0.466)PAAS(0.007)PT(0.001)PQSAER	_AKPAAQS(ph)EEETAT(ph)SPAASPTPQSAER_	3	924.73	68
P26645	Myristoylated alanine-rich C-kinase substrate	Marcks	0.697879	1	T	4.89853e-12	KES(0.302)GEGAEAEGAT(0.698)AEGAKDEAAAAAGGEGAAAPGEQAGGAGAEGAAGGEPR	_KESGEGAEAEGAT(ph)AEGAKDEAAAAAGGEGAAAPGEQAGGAGAEGAAGGEPR_	4	1126.74	181
Q68FF6	ARF GTPase-activating protein GIT1	Git1	0.694781	1	S	0.00530326	ARS(0.695)MDS(0.227)S(0.076)DLS(0.003)DGAVTLQEYLELKK	_ARS(ph)MDSSDLSDGAVTLQEYLELKK_	3	912.765	419
S4R1C4			0.692847	2;3	S	9.09814e-13	RQS(0.634)S(0.693)VT(0.42)S(0.183)QS(0.07)QDVAS(0.02)LS(0.55)S(0.354)PS(0.076)R	_RQS(ph)S(ph)VTSQSQDVASLS(ph)SPSR_	3	782.984	1117
P97855	Ras GTPase-activating protein-binding protein 1	G3bp1	0.689151	1	S	5.23884e-07	S(0.155)T(0.155)S(0.689)PAPADVAPAQEDLR	_STS(ph)PAPADVAPAQEDLR_	3	602.275	231
Q9DCL8	Protein phosphatase inhibitor 2	Ppp1r2	0.687681	1	S	6.46846e-18	IDEPNTPYHNMIGDDEDAY(0.143)S(0.688)DS(0.169)EGNEVMTPDILAK	_IDEPNTPYHNMIGDDEDAYS(ph)DSEGNEVMTPDILAK_	3	1325.89	88
Q6PER3	Microtubule-associated protein RP/EB family member 3	Mapre3	0.684967	1	S	0.000346703	KLIGTAVPQRT(0.277)S(0.685)PT(0.038)GPK	_KLIGTAVPQRTS(ph)PTGPK_	2	915.995	162
S4R2H6			0.683533	1	S	0.00012257	LSWGTENLDNVALS(0.007)S(0.287)S(0.684)PIHS(0.022)GR	_LSWGTENLDNVALSSS(ph)PIHSGR_	3	807.38	941
Q99P72	Reticulon-4	Rtn4	0.682908	2	S	0.00140867	ES(0.457)ET(0.213)FS(0.331)DS(0.316)S(0.683)PIEIIDEFPTFVSAK	_ES(ph)ETFSDSS(ph)PIEIIDEFPTFVSAK_	3	945.736	839
Q9QYB8	Beta-adducin	Add2	0.681151	4	T	2.65856e-05	DIAT(0.144)EKPGS(0.843)PVKS(0.35)T(0.681)PAS(0.981)PVQS(0.726)PS(0.274)K	_DIATEKPGS(ph)PVKST(ph)PAS(ph)PVQS(ph)PSK_	3	910.049	599
Q9WV69	Dematin	Epb49	0.680952	3	T	0.0103086	S(0.64)T(0.681)S(0.681)PPPS(0.996)PEVWAES(0.002)R	_ST(ph)S(ph)PPPS(ph)PEVWAESR_	2	933.841	91
Q9R1V6	Disintegrin and metalloproteinase domain-containing protein 22	Adam22	0.680833	2;3	S	3.63641e-06	S(0.156)NS(0.681)T(0.155)ET(0.008)LS(0.045)PAKS(0.916)PS(0.029)S(0.007)S(0.002)T(0.001)GSIASSR	_SNS(ph)TETLSPAKS(ph)PSSSTGSIASSR_	3	833.693	855
Q61136	Serine/threonine-protein kinase PRP4 homolog	Prpf4b	0.67958	2	S	0.0281273	S(0.864)KDAS(0.136)PINRWS(0.68)PT(0.32)R	_S(ph)KDASPINRWS(ph)PTR_	2	887.887	437
Q91XV3	Brain acid soluble protein 1	Basp1	0.67642	1	S	1.13853e-11	APAPAAPAAAEPQAEAPAAAAS(0.676)S(0.205)EQS(0.118)VAVKE	_APAPAAPAAAEPQAEAPAAAAS(ph)SEQSVAVKE_	3	980.133	217
P51859	Hepatoma-derived growth factor	Hdgf	0.671742	1	S	2.31693e-08	NS(0.048)T(0.276)PS(0.672)EPDS(0.004)GQGPPAEEEEGEEEAAKEEAEAQGVR	_NSTPS(ph)EPDSGQGPPAEEEEGEEEAAKEEAEAQGVR_	3	1240.85	202
E9Q3M9		2010300C02Rik	0.669714	1	S	3.34672e-12	ILVS(0.004)S(0.148)S(0.178)RPQS(0.67)PDHMSDASISSR	_ILVSSSRPQS(ph)PDHMSDASISSR_	3	813.044	189
Q91XV3	Brain acid soluble protein 1	Basp1	0.669614	1	S	1.26011e-11	SDAAPAAS(0.181)DS(0.67)KPS(0.13)S(0.019)AEPAPSSK	_SDAAPAASDS(ph)KPSSAEPAPSSK_	3	713.314	169
Q9ESJ4	NCK-interacting protein with SH3 domain	Nckipsd	0.668098	1	S	2.40338e-08	GTSASSATVMT(0.002)PS(0.164)T(0.164)S(0.668)DHHLDAAVSR	_GTSASSATVMTPSTS(ph)DHHLDAAVSR_	3	856.046	122
Q8CDJ3	Beclin 1-associated autophagy-related key regulator	Atg14	0.6633	3	S	0.0199548	ADLEES(0.004)MEFVDPGVAGES(0.663)DAS(0.663)GDERVS(0.663)DEET(0.663)DLGT(0.342)DWENLPS(0.001)PR	_ADLEESMEFVDPGVAGES(ph)DAS(ph)GDERVS(ph)DEETDLGTDWENLPSPR_	4	1248.99	416
Q8CDJ3	Beclin 1-associated autophagy-related key regulator	Atg14	0.6633	3	S	0.0199548	ADLEES(0.004)MEFVDPGVAGES(0.663)DAS(0.663)GDERVS(0.663)DEET(0.663)DLGT(0.342)DWENLPS(0.001)PR	_ADLEESMEFVDPGVAGES(ph)DAS(ph)GDERVS(ph)DEETDLGTDWENLPSPR_	4	1248.99	419
Q8CDJ3	Beclin 1-associated autophagy-related key regulator	Atg14	0.6633	3	S	0.0199548	ADLEES(0.004)MEFVDPGVAGES(0.663)DAS(0.663)GDERVS(0.663)DEET(0.663)DLGT(0.342)DWENLPS(0.001)PR	_ADLEESMEFVDPGVAGES(ph)DAS(ph)GDERVS(ph)DEETDLGTDWENLPSPR_	4	1248.99	425
Q8CDJ3	Beclin 1-associated autophagy-related key regulator	Atg14	0.6633	3	T	0.0199548	ADLEES(0.004)MEFVDPGVAGES(0.663)DAS(0.663)GDERVS(0.663)DEET(0.663)DLGT(0.342)DWENLPS(0.001)PR	_ADLEESMEFVDPGVAGES(ph)DAS(ph)GDERVS(ph)DEETDLGTDWENLPSPR_	4	1248.99	429
G3UYM7		Dtnb	0.661579	2	T	0.00222938	QAAQAT(0.662)GS(0.338)PHT(0.479)S(0.429)PT(0.093)HGGGRPMPMPVR	_QAAQAT(ph)GSPHT(ph)SPTHGGGRPMPMPVR_	3	929.407	529
Q9DCL8	Protein phosphatase inhibitor 2	Ppp1r2	0.660861	1	S	0.0475036	T(0.169)S(0.169)AAS(0.661)PPVVPSAEQPRPIVEEELSK	_TSAAS(ph)PPVVPSAEQPRPIVEEELSK_	3	900.116	23
Q9QYB8	Beta-adducin	Add2	0.658088	3	S	0.00182459	S(0.006)AGPQS(0.012)QLLAS(0.576)VIAEKS(0.658)RS(0.494)PS(0.459)T(0.464)ES(0.29)QLMS(0.042)K	_SAGPQSQLLAS(ph)VIAEKS(ph)RS(ph)PSTESQLMSK_	3	1086.49	528
Q3V3V9	Leucine-rich repeat-containing protein 16C	Rltpr	0.657862	2	S	0.00155461	LEAPPSPS(0.002)LGS(0.002)GLGS(0.002)KPLPPY(0.374)PT(0.274)EPS(0.313)S(0.322)PERS(0.658)PPS(0.043)PAT(0.01)DQR	_LEAPPSPSLGSGLGSKPLPPY(ph)PTEPSSPERS(ph)PPSPATDQR_	4	1061	1281
Q61609	Sodium-dependent phosphate transporter 1	Slc20a1	0.656919	2	S	1.19443e-08	EVKS(0.195)S(0.805)PS(0.657)ES(0.343)PLMEK	_EVKSS(ph)PS(ph)ESPLMEK_	2	854.351	271
O54781	SRSF protein kinase 2	Srpk2	0.651455	2	S	0.022659	T(0.002)VS(0.937)AS(0.209)S(0.651)T(0.2)GDLPK	_TVS(ph)ASS(ph)TGDLPK_	2	661.767	490
A2AEW8	GRIP1-associated protein 1	Gripap1	0.648883	1	S	2.15601e-06	S(0.011)LS(0.158)S(0.649)S(0.182)PQAQPPRPAELSDEEVAELFQR	_SLSS(ph)SPQAQPPRPAELSDEEVAELFQR_	3	1016.82	687
Q62108	Disks large homolog 4	Dlg4	0.646924	1	S	7.09491e-07	VHS(0.05)DS(0.647)ET(0.303)DDIGFIPSK	_VHSDS(ph)ETDDIGFIPSK_	2	913.896	480
Q9DBR7	Protein phosphatase 1 regulatory subunit 12A	Ppp1r12a	0.646874	1	S	0.00230253	DKKS(0.647)PLIES(0.177)T(0.177)ANMENNQPQK	_DKKS(ph)PLIESTANMENNQPQK_	3	784.702	299
A2ARP8	Microtubule-associated protein 1A	Mtap1a	0.644978	2	S	0.000411503	PASPALS(0.028)EGS(0.645)S(0.645)S(0.645)EAT(0.03)T(0.007)PVISSVAER	_PASPALSEGS(ph)S(ph)SEATTPVISSVAER_	3	864.049	2471
A2ARP8	Microtubule-associated protein 1A	Mtap1a	0.644978	2	S	0.000411503	PASPALS(0.028)EGS(0.645)S(0.645)S(0.645)EAT(0.03)T(0.007)PVISSVAER	_PASPALSEGS(ph)S(ph)SEATTPVISSVAER_	3	864.049	2472
A2ARP8	Microtubule-associated protein 1A	Mtap1a	0.644978	2	S	0.000411503	PASPALS(0.028)EGS(0.645)S(0.645)S(0.645)EAT(0.03)T(0.007)PVISSVAER	_PASPALSEGS(ph)S(ph)SEATTPVISSVAER_	3	864.049	2473
Q8BTI8	Serine/arginine repetitive matrix protein 2	Srrm2	0.640435	2	S	1.21044e-05	RS(0.275)S(0.64)S(0.092)ELS(0.993)PEVVEK	_RSS(ph)SELS(ph)PEVVEK_	2	803.842	1339
Q9D4J7	PHD finger protein 6	Phf6	0.639683	1	S	3.35332e-08	TAHNSEADLEESFNEHELEPS(0.36)S(0.64)PK	_TAHNSEADLEESFNEHELEPSS(ph)PK_	3	926.391	155
Q8K212	Phosphofurin acidic cluster sorting protein 1	Pacs1	0.638906	1	S	0.0127584	GS(0.361)GVAQS(0.639)PQQQPQQQPPQPQQPTPPK	_GSGVAQS(ph)PQQQPQQQPPQPQQPTPPK_	3	948.454	28
E9Q4K0	Actin-binding LIM protein 2	Ablim2	0.637548	2	S	3.62054e-07	T(0.638)S(0.638)S(0.638)PS(0.086)S(0.001)AGSVSLGHYTPTSR	_T(ph)S(ph)SPSSAGSVSLGHYTPTSR_	2	1069.94	383
E9Q4K0	Actin-binding LIM protein 2	Ablim2	0.637548	2	T	3.62054e-07	T(0.638)S(0.638)S(0.638)PS(0.086)S(0.001)AGSVSLGHYTPTSR	_T(ph)S(ph)SPSSAGSVSLGHYTPTSR_	2	1069.94	382
Q3TLI0	Trafficking protein particle complex subunit 10	Trappc10	0.636254	1	S	0.0223442	RQES(0.636)GS(0.299)S(0.064)LEPPSGLALEDGAHVLR	_RQES(ph)GSSLEPPSGLALEDGAHVLR_	3	862.417	708
S4R1C4			0.633745	3	S	0.00791554	RQS(0.634)S(0.693)VT(0.42)S(0.183)QS(0.07)QDVAS(0.02)LS(0.55)S(0.354)PS(0.076)R	_RQS(ph)S(ph)VTSQSQDVASLS(ph)SPSR_	3	782.984	1116
S4R291	Ankyrin-2	Ank2	0.632582	2	T	0.0108255	VGT(0.99)PT(0.633)DIHS(0.377)EKELPIT(0.001)NDITDSSQK	_VGT(ph)PT(ph)DIHSEKELPITNDITDSSQK_	3	962.433	2229
P06837	Neuromodulin	Gap43	0.63247	2	S	2.7961e-34	ATTDNS(1)PS(0.632)S(0.368)KAEDGPAKEEPK	_ATTDNS(ph)PS(ph)SKAEDGPAKEEPK_	2	1159.97	144
Q61699	Heat shock protein 105 kDa	Hsph1	0.630619	1	S	0.000396117	NIQQDNSEAGT(0.001)QPQVQT(0.051)DGQQT(0.051)S(0.051)QS(0.177)PPS(0.631)PELT(0.025)S(0.01)EES(0.002)K	_NIQQDNSEAGTQPQVQTDGQQTSQSPPS(ph)PELTSEESK_	4	1013.45	558
Q62261	Spectrin beta chain, brain 1	Sptbn1	0.629132	1;3	S	0.000269975	T(0.457)S(0.551)S(0.991)KES(0.629)S(0.357)PVPS(0.012)PT(0.002)LDRK	_TS(ph)S(ph)KES(ph)SPVPSPTLDRK_	2	1028.43	2163
K4DI58	Cell adhesion molecule 3	Cadm3	0.627078	2	S	0.0392453	PIIT(0.189)GY(0.556)KS(0.627)S(0.627)LR	_PIITGYKS(ph)S(ph)LR_	2	697.828	172
K4DI58	Cell adhesion molecule 3	Cadm3	0.627078	2	S	0.0392453	PIIT(0.189)GY(0.556)KS(0.627)S(0.627)LR	_PIITGYKS(ph)S(ph)LR_	2	697.828	173
Q60771	Claudin-11	Cldn11	0.625146	2	S	8.43247e-09	FYYSS(0.335)GS(0.625)S(0.064)S(0.944)PT(0.032)HAK	_FYYSSGS(ph)SS(ph)PTHAK_	2	839.813	196
Q9WUD1	STIP1 homology and U box-containing protein 1	Stub1	0.623636	2	T	5.55051e-18	LGT(0.624)GGGGS(0.376)PDKS(1)PSAQELK	_LGT(ph)GGGGSPDKS(ph)PSAQELK_	2	973.419	15
S4R2L4			0.622285	1	T	0.00539434	DGLALEKT(0.622)S(0.378)PDREK	_DGLALEKT(ph)SPDREK_	3	546.929	16
P11798	Calcium/calmodulin-dependent protein kinase type II subunit alpha	Camk2a	0.622058	3;4	T	5.5877e-08	NDGVKES(0.512)S(0.533)ES(0.601)T(0.622)NT(0.866)T(0.866)IEDEDTKVR	_NDGVKESSES(ph)T(ph)NT(ph)T(ph)IEDEDTKVR_	3	958.685	334
Q8BZH4	Pogo transposable element with ZNF domain	Pogz	0.620351	1	S	2.23212e-11	SLDAEPSVPS(0.005)AAKPS(0.62)S(0.375)PEK	_SLDAEPSVPSAAKPS(ph)SPEK_	2	988.964	421
P20357	Microtubule-associated protein 2	Map2	0.619635	3	S	1.23543e-08	VDHGAEIIT(0.259)QS(0.728)PS(0.235)RS(0.62)S(0.316)VAS(0.841)PR	_VDHGAEIITQS(ph)PSRS(ph)SVAS(ph)PR_	3	812.012	1787
Q6PE13	Proline-rich transmembrane protein 3	Prrt3	0.617099	1	S	1.40309e-10	TSLPQHVMEPPVGAAAAGTS(0.008)GS(0.617)S(0.367)LDS(0.007)FS(0.001)K	_TSLPQHVMEPPVGAAAAGTSGS(ph)SLDSFSK_	3	970.451	894
F6ZKC7		Cstf2	0.616536	1	T	0.000498701	GQGT(0.617)LQHS(0.383)PVGPAGPASIER	_GQGT(ph)LQHSPVGPAGPASIER_	3	680.328	141
P11031	Activated RNA polymerase II transcriptional coactivator p15	Sub1	0.611841	1	S	0.0137425	QS(0.156)S(0.612)S(0.116)S(0.116)RDDNMFQIGK	_QSS(ph)SSRDDNMFQIGK_	2	890.372	56
Q9CZX7	Transmembrane protein 55A	Tmem55a	0.61173	1	S	0.0428232	SPLLSASHSGNVTPT(0.003)APPY(0.067)LQES(0.317)S(0.612)PR	_SPLLSASHSGNVTPTAPPYLQESS(ph)PR_	3	925.111	33
P28571	Sodium- and chloride-dependent glycine transporter 1	Slc6a9	0.60777	1	S	0.0210121	Y(0.022)APT(0.131)T(0.12)T(0.12)PS(0.608)PEDGFEVQPLHPDK	_YAPTTTPS(ph)PEDGFEVQPLHPDK_	3	836.044	659
E9Q6L9	Leucine-rich repeat-containing protein 7	Lrrc7	0.607049	1	S	0.00307279	VYNIPLENYAS(0.196)GS(0.196)DHLGS(0.607)HERPDK	_VYNIPLENYASGSDHLGS(ph)HERPDK_	4	695.318	982
O54829	Regulator of G-protein signaling 7	Rgs7	0.606652	2	T	0.00152616	S(0.128)HS(0.859)PT(0.607)HT(0.39)PT(0.015)PETKPPTEDELHQQIK	_SHS(ph)PT(ph)HTPTPETKPPTEDELHQQIK_	4	749.586	243
Q91W96	Anaphase-promoting complex subunit 4	Anapc4	0.606062	2	T	1.28399e-10	IKEEVLS(0.892)ES(0.502)ET(0.606)EAHQDAAALDPDVVIK	_IKEEVLS(ph)ESET(ph)EAHQDAAALDPDVVIK_	3	1032.81	781
Q8BR65	Sin3 histone deacetylase corepressor complex component SDS3	Suds3	0.605447	2	S	1.00972e-11	RPAS(0.953)PS(0.441)S(0.605)PEHLPATPAESPAQR	_RPAS(ph)PSS(ph)PEHLPATPAESPAQR_	3	815.032	237
Q8BL00	Cadherin-related family member 3	Cdhr3	0.605347	2	S	0.017578	AVY(0.395)RHCS(0.605)S(0.481)T(0.481)T(0.037)R	_AVYRHCS(ph)S(ph)TTR_	2	720.778	741
O70166	Stathmin-3	Stmn3	0.602062	4	S	1.67359e-07	ASGQSFEVILKS(0.494)PS(0.602)DLS(0.904)PES(0.999)PVLS(0.589)S(0.412)PPK	_ASGQSFEVILKSPS(ph)DLS(ph)PES(ph)PVLS(ph)SPPK_	3	1068.46	62
Q8VCV2	Protein NDRG3	Ndrg3	0.601259	2	S	5.53084e-29	THSTS(0.002)S(0.397)S(0.601)IGS(0.989)GES(0.009)PFS(0.002)R	_THSTSSS(ph)IGS(ph)GESPFSR_	2	942.364	348
Q8BTI8	Serine/arginine repetitive matrix protein 2	Srrm2	0.600966	2	S	6.77865e-05	IHT(0.004)T(0.01)ALT(0.035)GQS(0.332)PPLAS(0.601)GHQGEGDAPS(0.018)VEPGAT(0.003)NIQQPS(0.126)S(0.831)PAPS(0.028)T(0.013)K	_IHTTALTGQSPPLAS(ph)GHQGEGDAPSVEPGATNIQQPSS(ph)PAPSTK_	4	1120.52	300
Q99JF8	PC4 and SFRS1-interacting protein	Psip1	0.591357	2	T	5.73166e-08	NLAKPGVT(0.021)S(0.11)T(0.591)S(0.354)DS(0.923)EDEDDQEGEK	_NLAKPGVTST(ph)SDS(ph)EDEDDQEGEK_	3	871.004	271
O70166	Stathmin-3	Stmn3	0.588677	4	S	1.67359e-07	ASGQSFEVILKS(0.494)PS(0.602)DLS(0.904)PES(0.999)PVLS(0.589)S(0.412)PPK	_ASGQSFEVILKSPS(ph)DLS(ph)PES(ph)PVLS(ph)SPPK_	3	1068.46	72
A2ARP8	Microtubule-associated protein 1A	Mtap1a	0.587529	2	T	0.000192958	VPS(0.007)APGQES(0.993)PVPDT(0.014)KS(0.33)T(0.588)PPT(0.068)R	_VPSAPGQES(ph)PVPDTKST(ph)PPTR_	3	770.013	2035
P20357	Microtubule-associated protein 2	Map2	0.587498	3	S	9.83295e-05	VDHGAEIIT(0.473)QS(0.524)PS(0.188)RS(0.594)S(0.587)VAS(0.634)PR	_VDHGAEIITQS(ph)PSRS(ph)SVAS(ph)PR_	3	812.012	1788
Q62261	Spectrin beta chain, brain 1	Sptbn1	0.586158	3;4	S	1.04904e-29	T(0.485)S(0.586)S(0.929)KES(0.078)S(0.922)PVPS(0.9)PT(0.1)LDRK	_TS(ph)S(ph)KESS(ph)PVPS(ph)PTLDRK_	2	1068.41	2159
Q62172	RalA-binding protein 1	Ralbp1	0.585519	2	S	7.90181e-07	T(0.002)GEPS(0.998)PPHDVLHEPPDT(0.414)VS(0.586)DDDKDHGK	_TGEPS(ph)PPHDVLHEPPDTVS(ph)DDDKDHGK_	3	1027.76	62
Q6ZPJ3	Ubiquitin-conjugating enzyme E2 O	Ube2o	0.584966	1	S	0.000423371	NMTVEQLLT(0.002)GS(0.014)PT(0.199)S(0.585)PT(0.199)VEPEKPT(0.001)R	_NMTVEQLLTGSPTS(ph)PTVEPEKPTR_	3	898.101	836
B1AZP2	Disks large-associated protein 4	Dlgap4	0.584521	2	S	2.58353e-20	SEVTSQSGLS(0.003)NS(0.123)S(0.873)DS(0.585)LDS(0.114)S(0.114)T(0.114)RPPS(0.031)VT(0.043)R	_SEVTSQSGLSNSS(ph)DS(ph)LDSSTRPPSVTR_	3	981.087	611
S4R291	Ankyrin-2	Ank2	0.583961	1	T	0.000110568	TQDQQEYYVT(0.584)T(0.416)PGAEVEDPQK	_TQDQQEYYVT(ph)TPGAEVEDPQK_	3	836.027	3712
E9QKC6	Tripartite motif-containing protein 2	Trim2	0.578603	1	S	8.6058e-06	TGNAYLT(0.001)AELS(0.579)T(0.417)PDGS(0.004)VADGEILDNK	_TGNAYLTAELS(ph)TPDGSVADGEILDNK_	3	911.083	396
O88935	Synapsin-1	Syn1	0.578539	1	S	0.0112711	GS(0.006)HS(0.017)QS(0.159)S(0.579)S(0.239)PGALTLGR	_GSHSQSS(ph)SPGALTLGR_	3	541.249	437
Q62108	Disks large homolog 4	Dlg4	0.576533	1	S	1.92811e-37	EQLMNS(0.011)S(0.367)LGS(0.577)GT(0.042)AS(0.003)LR	_EQLMNSSLGS(ph)GTASLR_	2	865.893	418
Q8K019	Bcl-2-associated transcription factor 1	Bclaf1	0.574918	2	S	0.00848483	Y(0.298)S(0.702)PS(0.575)QNS(0.425)PIHHIPSR	_YS(ph)PS(ph)QNSPIHHIPSR_	3	627.268	286
Q569Z6	Thyroid hormone receptor-associated protein 3	Thrap3	0.57325	2	T	1.39239e-25	WAHDKFS(1)GEEGEIEDDES(0.427)GT(0.573)ENREEK	_WAHDKFS(ph)GEEGEIEDDESGT(ph)ENREEK_	3	1061.74	937
Q61644	Protein kinase C and casein kinase substrate in neurons protein 1	Pacsin1	0.571403	2	S	9.10524e-07	KAEGATLSNAT(0.025)GAVES(0.134)T(0.134)S(0.134)QAGDRGS(0.571)VS(0.118)S(0.876)Y(0.005)DR	_KAEGATLSNATGAVESTSQAGDRGS(ph)VSS(ph)YDR_	3	1078.13	343
Q8VD37	SH3-containing GRB2-like protein 3-interacting protein 1	Sgip1	0.570655	1	S	1.23486e-10	PFSPPIHS(0.017)S(0.571)S(0.412)PPPIAPLAR	_PFSPPIHSS(ph)SPPPIAPLAR_	3	683.35	490
Q7TSI3	Serine/threonine-protein phosphatase 6 regulatory subunit 1	Ppp6r1	0.568719	1	S	7.54465e-05	EADMSSIQIPS(0.431)S(0.569)PPAHGSPQLR	_EADMSSIQIPSS(ph)PPAHGSPQLR_	3	795.702	739
Q9QYC0	Alpha-adducin	Add1	0.56764	2;3	S	8.25452e-12	EKS(0.748)PPDQS(0.252)AVPNT(0.898)PPS(0.568)T(0.534)PVKLEEDLPQEPTSR	_EKS(ph)PPDQSAVPNT(ph)PPS(ph)TPVKLEEDLPQEPTSR_	4	928.412	613
Q8CHG7	Rap guanine nucleotide exchange factor 2	Rapgef2	0.565866	1	S	6.63203e-06	KQAEDTISNAS(0.001)S(0.003)QLS(0.566)S(0.419)PPT(0.008)S(0.002)PQSSPR	_KQAEDTISNASSQLS(ph)SPPTSPQSSPR_	3	927.429	1114
Q68FF6	ARF GTPase-activating protein GIT1	Git1	0.564071	2	T	0.000195619	S(0.035)QS(0.092)ELDDQHDY(0.175)DS(0.564)VAS(0.564)DEDT(0.564)DQEPLPS(0.004)AGAT(0.002)R	_SQSELDDQHDYDS(ph)VAS(ph)DEDTDQEPLPSAGATR_	4	910.355	401
Q9D0L8	mRNA cap guanine-N7 methyltransferase	Rnmt	0.562104	1	S	0.00109474	EFGEDLVEQNSSYVQDS(0.438)PS(0.562)K	_EFGEDLVEQNSSYVQDSPS(ph)K_	3	779.997	66
E9QLK9	Clathrin coat assembly protein AP180	Snap91	0.561942	2	S	6.67659e-11	S(0.438)S(0.562)PATTVT(0.239)S(0.748)PNS(0.01)T(0.003)PAK	_SS(ph)PATTVTS(ph)PNSTPAK_	2	853.358	306
E9Q0J2	Ral GTPase-activating protein subunit beta	Ralgapb	0.561502	2	S	0.00502829	VQHQAS(0.071)S(0.322)T(0.294)S(0.321)PLS(0.562)S(0.42)PNQT(0.008)S(0.002)S(0.001)EPR	_VQHQASS(ph)TSPLS(ph)SPNQTSSEPR_	3	829.018	420
O08582	GTP-binding protein 1	Gtpbp1	0.561136	2	S	0.00284111	S(0.435)RS(0.524)PVDS(0.04)PVPAS(0.001)MFAPEPS(0.561)S(0.438)PGAAR	_SRS(ph)PVDSPVPASMFAPEPS(ph)SPGAAR_	3	886.387	24
E9QKI4	Proline-rich AKT1 substrate 1	Akt1s1	0.559882	2	S	2.29696e-10	S(0.44)S(0.56)DEENGPPS(0.073)S(0.927)PDLDR	_SS(ph)DEENGPPSS(ph)PDLDR_	2	931.33	275
E9PYD5	Transcription elongation factor A protein 1	Tcea1	0.559095	1	S	4.89785e-21	KKEPAIS(0.005)S(0.559)QNS(0.436)PEAR	_KKEPAISS(ph)QNSPEAR_	2	861.415	108
G5E8T2	E3 ubiquitin-protein ligase TTC3	Ttc3	0.558962	1	S	0.0142079	RNS(0.441)DS(0.559)AGPFAVPDHLR	_RNSDS(ph)AGPFAVPDHLR_	3	606.948	1062
Q99P72	Reticulon-4	Rtn4	0.558851	1	S	7.18868e-41	KAQIITEKT(0.441)S(0.559)PK	_KAQIITEKTS(ph)PK_	2	712.381	489
Q8VD37	SH3-containing GRB2-like protein 3-interacting protein 1	Sgip1	0.555484	2	S	2.73968e-11	LPPGKPGVGDVS(0.444)RPFS(0.555)PPIHS(0.007)S(0.165)S(0.829)PPPIAPLAR	_LPPGKPGVGDVSRPFS(ph)PPIHSSS(ph)PPPIAPLAR_	4	847.681	484
A0JNY3	Gephyrin	Gphn	0.554581	3	S	6.81613e-13	EVHDELEDLPS(1)PPPPLS(0.924)PPPT(0.311)T(0.21)S(0.555)PHK	_EVHDELEDLPS(ph)PPPPLS(ph)PPPTTS(ph)PHK_	3	1018.44	200
Q6P5B5	Fragile X mental retardation syndrome-related protein 2	Fxr2	0.55404	2	T	0.000331283	T(0.554)DGS(0.45)IS(0.996)GDRQPVTVADYISR	_T(ph)DGSIS(ph)GDRQPVTVADYISR_	2	1149	600
P20357	Microtubule-associated protein 2	Map2	0.552787	1	S	0.000342899	T(0.001)GVIQT(0.259)S(0.553)T(0.18)EQS(0.008)FS(0.001)KEDQK	_TGVIQTS(ph)TEQSFSKEDQK_	2	1046.98	472
Q62108	Disks large homolog 4	Dlg4	0.552548	1	S	2.4779e-07	VHS(0.553)DS(0.431)ET(0.017)DDIGFIPSKR	_VHS(ph)DSETDDIGFIPSKR_	3	661.633	478
Q9QXW9	Large neutral amino acids transporter small subunit 2	Slc7a8	0.551625	2	S	1.92094e-12	NHPGS(0.056)DT(0.326)S(0.618)PEAEAS(0.552)S(0.448)GGGGVALKK	_NHPGSDTS(ph)PEAEAS(ph)SGGGGVALKK_	3	805.007	27
O08539	Myc box-dependent-interacting protein 1	Bin1	0.55158	3	S	0.00831269	AQPS(0.552)DNAPEKGNKS(0.552)PS(0.898)PPPDGS(0.994)PAAT(0.005)PEIR	_AQPS(ph)DNAPEKGNKSPS(ph)PPPDGS(ph)PAATPEIR_	4	813.847	286
S4R291	Ankyrin-2	Ank2	0.550903	3	S	0.00151871	VQPPS(0.191)PLPS(0.551)S(0.551)IDS(0.551)NS(0.551)S(0.551)PEEAT(0.055)QFQPIVPK	_VQPPSPLPS(ph)S(ph)IDS(ph)NSSPEEATQFQPIVPK_	4	829.867	2652
S4R291	Ankyrin-2	Ank2	0.550903	3	S	0.00151871	VQPPS(0.191)PLPS(0.551)S(0.551)IDS(0.551)NS(0.551)S(0.551)PEEAT(0.055)QFQPIVPK	_VQPPSPLPS(ph)S(ph)IDS(ph)NSSPEEATQFQPIVPK_	4	829.867	2653
Q9R1V6	Disintegrin and metalloproteinase domain-containing protein 22	Adam22	0.550727	3	S	2.34134e-05	S(0.118)NS(0.581)T(0.289)ET(0.012)LS(0.009)PAKS(0.961)PS(0.092)S(0.551)S(0.288)T(0.089)GS(0.009)IASSR	_SNS(ph)TETLSPAKS(ph)PSS(ph)STGSIASSR_	3	860.349	867
A2ARP8	Microtubule-associated protein 1A	Mtap1a	0.550576	2	S	2.17819e-08	MAS(0.448)PPPS(0.551)GPPS(0.002)AAHT(0.049)PFHQS(0.949)PVEEK	_MASPPPS(ph)GPPSAAHTPFHQS(ph)PVEEK_	2	1372.08	1233
B2RRE2	Unconventional myosin-XVIIIa	Myo18a	0.550467	3	S	8.13577e-06	S(0.009)RDES(0.01)AS(0.05)ET(0.505)S(0.55)T(0.879)PS(0.978)EHS(0.019)AAPSPQVEVR	_SRDESASETS(ph)T(ph)PS(ph)EHSAAPSPQVEVR_	3	994.391	154
S4R1C4			0.549987	3	S	0.00791554	RQS(0.634)S(0.693)VT(0.42)S(0.183)QS(0.07)QDVAS(0.02)LS(0.55)S(0.354)PS(0.076)R	_RQS(ph)S(ph)VTSQSQDVASLS(ph)SPSR_	3	782.984	1129
Q9QYX7	Protein piccolo	Pclo	0.549475	1	S	0.00229048	TSIGSSSS(0.001)EEY(0.001)KQEDS(0.549)QGS(0.447)GEDEDFIRK	_TSIGSSSSEEYKQEDS(ph)QGSGEDEDFIRK_	3	1059.11	1481
S4R1E7	BAI1-associated protein 3	Baiap3	0.547602	1	S	0.0232524	S(0.548)GS(0.452)PAPAEPVDPNR	_S(ph)GSPAPAEPVDPNR_	2	737.322	76
Q640R3	Hepatocyte cell adhesion molecule	Hepacam	0.543015	2	S	9.71959e-05	T(0.001)HT(0.013)S(0.985)PPRAPS(0.543)S(0.457)PGR	_THTS(ph)PPRAPS(ph)SPGR_	2	804.34	385
A2ARP8	Microtubule-associated protein 1A	Mtap1a	0.54294	1	T	0.00181424	AELEEMEEVHPS(0.451)DEEEEET(0.543)KAES(0.006)FYQK	_AELEEM(ox)EEVHPSDEEEEET(ph)KAESFYQK_	4	835.342	912
E9Q4K0	Actin-binding LIM protein 2	Ablim2	0.542548	1	S	1.86622e-17	TSSESIVSVPAS(0.543)S(0.2)T(0.123)S(0.061)GS(0.061)PS(0.013)R	_TSSESIVSVPAS(ph)STSGSPSR_	2	1001.95	308
Q80TB8	Synaptic vesicle membrane protein VAT-1 homolog-like	Vat1l	0.541396	2	T	9.16041e-28	TPTPLMANDS(0.815)T(0.188)ET(0.541)S(0.455)EAGEEEEDHEGDSENK	_TPTPLMANDS(ph)TET(ph)SEAGEEEEDHEGDSENK_	3	1137.09	393
Q6PER3	Microtubule-associated protein RP/EB family member 3	Mapre3	0.540256	1	T	2.519e-06	LIGT(0.019)AVPQRT(0.54)S(0.376)PT(0.065)GPK	_LIGTAVPQRT(ph)SPTGPK_	3	568.301	161
P20357	Microtubule-associated protein 2	Map2	0.539669	1;2	S	1.36755e-07	ASQPSPPAQEAGYSTLAQSYTPDHPS(0.002)ELPEEPS(0.54)S(0.458)PQER	_ASQPSPPAQEAGYSTLAQSYTPDHPSELPEEPS(ph)SPQER_	4	1037.21	654
Q8CCN5	Breast carcinoma-amplified sequence 3 homolog	Bcas3	0.538856	1	S	9.30595e-12	LADAMAES(0.461)PS(0.539)RDVVGSGTELQR	_LADAMAESPS(ph)RDVVGSGTELQR_	3	790.365	871
Q80T32	Probable G-protein coupled receptor 133	Gpr133	0.537274	2	S	0.0184287	VWS(0.015)LT(0.457)S(0.537)S(0.536)S(0.455)AR	_VWSLT(ph)S(ph)SSAR_	2	627.252	857
Q80T32	Probable G-protein coupled receptor 133	Gpr133	0.536493	2	S	0.0184287	VWS(0.015)LT(0.457)S(0.537)S(0.536)S(0.455)AR	_VWSLT(ph)S(ph)SSAR_	2	627.252	858
Q5RJI5	Serine/threonine-protein kinase BRSK1	Brsk1	0.536228	1	S	0.00417896	MQVPTAEEMS(0.001)S(0.001)LT(0.011)PES(0.536)S(0.45)PELAKR	_MQVPTAEEMSSLTPES(ph)SPELAKR_	3	866.732	586
E0CZ72	Kinesin-like protein KIF2A	Kif2a	0.536116	1	S	0.000122538	ELTVNPAAAGDVHPIMHHPPS(0.001)QIDDLET(0.002)QWGVGS(0.536)S(0.461)PQR	_ELTVNPAAAGDVHPIMHHPPSQIDDLETQWGVGS(ph)SPQR_	4	1042.49	622
Q8VE19	WD repeat-containing protein mio	Mios	0.53595	1	S	0.0127621	GFSQYGVS(0.313)GS(0.536)PT(0.151)K	_GFSQYGVSGS(ph)PTK_	2	697.803	766
Q6PE13	Proline-rich transmembrane protein 3	Prrt3	0.535939	1	S	0.00727571	GSVGPAPS(0.005)LS(0.014)ELDLRPPS(0.446)PINLS(0.536)R	_GSVGPAPSLSELDLRPPSPINLS(ph)R_	3	847.102	804
E9PUI5	Formin-binding protein 1-like	Fnbp1l	0.533092	2	T	0.00143472	RHS(0.793)S(0.207)DINHLVT(0.533)QGRES(0.369)PEGS(0.027)Y(0.065)T(0.006)DDANQEVR	_RHS(ph)SDINHLVT(ph)QGRESPEGSYTDDANQEVR_	4	890.132	496
Q9QYX7	Protein piccolo	Pclo	0.533036	2	S	7.6645e-11	DQFGS(0.533)S(0.533)HS(0.934)LPEVQQHMR	_DQFGS(ph)SHS(ph)LPEVQQHMR_	3	714.954	4322
Q9QYX7	Protein piccolo	Pclo	0.533036	2	S	7.6645e-11	DQFGS(0.533)S(0.533)HS(0.934)LPEVQQHMR	_DQFGS(ph)SHS(ph)LPEVQQHMR_	3	714.954	4323
Q9QXW9	Large neutral amino acids transporter small subunit 2	Slc7a8	0.532805	2	T	0.00227468	NHPGS(0.99)DT(0.533)S(0.477)PEAEASSGGGGVALK	_NHPGS(ph)DT(ph)SPEAEASSGGGGVALK_	2	1142.96	20
Q62172	RalA-binding protein 1	Ralbp1	0.532754	2	T	0.00955748	T(0.007)GEPS(0.992)PPHDVLHEPPDT(0.533)VS(0.468)DDDKDHGK	_TGEPS(ph)PPHDVLHEPPDT(ph)VSDDDKDHGK_	4	771.068	60
O54916	RalBP1-associated Eps domain-containing protein 1	Reps1	0.532631	2	S	0.000812372	PSAEQQEPVS(0.007)PVVS(0.045)PQQS(0.846)PPT(0.533)S(0.533)PHT(0.037)WR	_PSAEQQEPVSPVVSPQQS(ph)PPT(ph)SPHTWR_	3	1038.46	174
O54916	RalBP1-associated Eps domain-containing protein 1	Reps1	0.532631	2	T	0.000812372	PSAEQQEPVS(0.007)PVVS(0.045)PQQS(0.846)PPT(0.533)S(0.533)PHT(0.037)WR	_PSAEQQEPVSPVVSPQQS(ph)PPT(ph)SPHTWR_	3	1038.46	173
P14873	Microtubule-associated protein 1B	Map1b	0.531444	1	S	0.0187795	AS(0.531)LS(0.469)PMDEPVPDSESPVEK	_AS(ph)LSPM(ox)DEPVPDSESPVEK_	2	1055.45	1371
Q62261	Spectrin beta chain, brain 1	Sptbn1	0.53142	1	S	2.35474e-17	AQTLPTSVVTIT(0.003)S(0.204)ES(0.531)S(0.262)PGKR	_AQTLPTSVVTITSES(ph)SPGKR_	3	713.695	2339
Q8K212	Phosphofurin acidic cluster sorting protein 1	Pacs1	0.530296	2	S	0.0190755	T(0.008)NS(0.194)S(0.735)DS(0.53)ERS(0.53)PDLGHS(0.001)TQIPR	_TNSS(ph)DS(ph)ERSPDLGHSTQIPR_	3	781.992	529
Q8K212	Phosphofurin acidic cluster sorting protein 1	Pacs1	0.530296	2	S	0.0190755	T(0.008)NS(0.194)S(0.735)DS(0.53)ERS(0.53)PDLGHS(0.001)TQIPR	_TNSS(ph)DS(ph)ERSPDLGHSTQIPR_	3	781.992	532
A0A087WNU5			0.529977	1	S	0.0146247	LLS(0.53)QHS(0.438)VEY(0.032)HDDELSDLR	_LLS(ph)QHSVEYHDDELSDLR_	3	746.002	1150
O88703	Potassium/sodium hyperpolarization-activated cyclic nucleotide-gated channel 2	Hcn2	0.528721	2	S	7.65547e-11	RAPPGPLPPAASPGPPAAS(1)PPAAPS(0.529)S(0.471)PR	_RAPPGPLPPAASPGPPAAS(ph)PPAAPS(ph)SPR_	3	910.105	756
O08919	Numb-like protein	Numbl	0.528567	2	T	2.36068e-12	KAEAAAAPAVAPGPAQPGHVS(0.951)PT(0.097)PAT(0.529)T(0.276)S(0.147)PGEK	_KAEAAAAPAVAPGPAQPGHVS(ph)PTPAT(ph)TSPGEK_	3	1041.82	268
O35874	Neutral amino acid transporter A	Slc1a4	0.527264	1	T	1.40209e-09	SEEET(0.527)S(0.461)PLVT(0.012)HQNPAGPVAIAPELESK	_SEEET(ph)SPLVTHQNPAGPVAIAPELESK_	3	970.797	506
Q9D6Z1	Nucleolar protein 56	Nop56	0.526297	2	S	0.000138601	KS(0.475)S(0.526)PKEEVAS(0.998)EPEEAASPTTPK	_KSS(ph)PKEEVAS(ph)EPEEAASPTTPK_	3	820.359	529
E9Q8N8	Electrogenic sodium bicarbonate cotransporter 1	Slc4a4	0.525743	1	S	2.43501e-11	NLTS(0.098)S(0.526)S(0.37)LNDIS(0.007)DKPEKDQLK	_NLTSS(ph)SLNDISDKPEKDQLK_	3	771.372	256
P52194	Calmegin	Clgn	0.525175	1	S	0.00623322	S(0.525)GS(0.475)EDEMKDADESPGSGDAPLK	_S(ph)GSEDEMKDADESPGSGDAPLK_	3	767.974	580
F8VQC1		Srp72	0.523668	2	S	0.00169475	AVS(0.524)S(0.465)PPT(0.419)S(0.419)PRPGS(0.127)AAT(0.04)IS(0.004)S(0.001)S(0.001)ASNIVPPR	_AVS(ph)SPPT(ph)SPRPGSAATISSSASNIVPPR_	3	951.118	620
Q810U3	Neurofascin	Nfasc	0.523597	4	T	0.000923816	DVPLGPEDPKEEDGS(0.771)FDY(0.724)S(0.503)DEDNKPLQGS(0.538)QT(0.524)S(0.885)LDGT(0.056)IK	_DVPLGPEDPKEEDGS(ph)FDY(ph)SDEDNKPLQGS(ph)QTS(ph)LDGTIK_	3	1481.59	1176
Q9R0P4	Small acidic protein	Smap	0.522673	1	S	7.53407e-19	S(0.523)AS(0.475)PDDDLGS(0.001)S(0.001)NWEAADLGNEERK	_S(ph)ASPDDDLGSSNWEAADLGNEERK_	3	881.7	15
P23242	Gap junction alpha-1 protein	Gja1	0.520709	1	S	7.05147e-06	MGQAGS(0.031)T(0.125)IS(0.521)NS(0.324)HAQPFDFPDDSQNAK	_MGQAGSTIS(ph)NSHAQPFDFPDDSQNAK_	3	944.064	328
Q3TYD6	Serine/threonine-protein kinase LMTK2	Lmtk2	0.518955	1	S	0.000797003	HSGTS(0.001)PQAS(0.106)PALLT(0.297)EEGS(0.519)PT(0.068)APT(0.009)DPILKPEETK	_HSGTSPQASPALLTEEGS(ph)PTAPTDPILKPEETK_	3	1156.23	797
O88703	Potassium/sodium hyperpolarization-activated cyclic nucleotide-gated channel 2	Hcn2	0.518358	2	S	0.0428121	T(0.462)S(0.518)PY(0.019)GVPGS(0.948)PAT(0.052)R	_TS(ph)PYGVPGS(ph)PATR_	2	725.294	764
Q8VHJ5	Serine/threonine-protein kinase MARK1	Mark1	0.518135	2	S	0.0112557	S(0.917)RPS(0.518)S(0.518)DLNNS(0.036)T(0.011)LQSPAHLK	_S(ph)RPS(ph)SDLNNSTLQSPAHLK_	3	737.998	393
Q8VHJ5	Serine/threonine-protein kinase MARK1	Mark1	0.518135	2	S	0.0112557	S(0.917)RPS(0.518)S(0.518)DLNNS(0.036)T(0.011)LQSPAHLK	_S(ph)RPS(ph)SDLNNSTLQSPAHLK_	3	737.998	394
Q7TQF7	Amphiphysin	Amph	0.518056	2	S	0.0402004	T(0.094)PS(0.349)PPEEPS(0.518)PLPS(0.346)PT(0.288)AS(0.263)PNHT(0.074)LAPAS(0.067)PAPVRPR	_TPSPPEEPS(ph)PLPS(ph)PTASPNHTLAPASPAPVRPR_	4	878.921	268
D3Z6G3		Mapre3	0.517742	1	T	0.00267943	QGQDVAPPPNPVPQRT(0.518)S(0.405)PT(0.077)GPK	_QGQDVAPPPNPVPQRT(ph)SPTGPK_	3	783.385	146
A2AJI0	MAP7 domain-containing protein 1	Map7d1	0.5075	3	S	0.0184019	AAEEKEPAAPAS(0.999)PAPS(0.986)PVPS(0.507)PT(0.507)PAQPQK	_AAEEKEPAAPAS(ph)PAPS(ph)PVPS(ph)PTPAQPQK_	3	997.438	552
A2AJI0	MAP7 domain-containing protein 1	Map7d1	0.5075	3	T	0.0184019	AAEEKEPAAPAS(0.999)PAPS(0.986)PVPS(0.507)PT(0.507)PAQPQK	_AAEEKEPAAPAS(ph)PAPS(ph)PVPS(ph)PTPAQPQK_	3	997.438	554
Q64332	Synapsin-2	Syn2	0.506631	2	S	4.0848e-10	MNQLLS(0.507)RT(0.507)PALS(0.834)PQRPLT(0.076)T(0.076)QQPQSGTLK	_MNQLLS(ph)RTPALS(ph)PQRPLTTQQPQSGTLK_	4	813.656	420
A2ARP8	Microtubule-associated protein 1A	Mtap1a	0.505504	3	T	1.99798e-14	T(0.005)EAT(0.009)QGLDY(0.023)VPS(0.406)AGT(0.406)IS(0.406)PT(0.506)S(0.506)S(0.734)LEEDK	_TEATQGLDYVPS(ph)AGTISPT(ph)SS(ph)LEEDK_	3	979.397	1135
Q99NE5	Regulating synaptic membrane exocytosis protein 1	Rims1	0.501609	1	T	0.0393532	MERPSIS(0.002)VIS(0.352)PT(0.502)S(0.144)PGALK	_MERPSISVISPT(ph)SPGALK_	3	650.664	565
Q9WV92	Band 4.1-like protein 3	Epb41l3	0.500898	2	T	7.98591e-13	TDT(0.001)AADGET(0.501)S(0.5)AT(0.007)ES(0.991)DQEEDAEIK	_TDTAADGET(ph)SATES(ph)DQEEDAEIK_	3	858.316	542
Q8BTI8	Serine/arginine repetitive matrix protein 2	Srrm2	0.500463	2	T	8.48018e-07	S(0.006)S(0.007)S(0.988)PVT(0.001)ELT(0.5)ARS(0.498)PVKQDK	_SSS(ph)PVTELT(ph)ARSPVKQDK_	3	697.324	1074
P06837	Neuromodulin	Gap43	0.500054	2	S	3.84236e-18	ATTDNS(1)PS(0.5)S(0.5)KAEDGPAKEEPK	_ATTDNS(ph)PS(ph)SKAEDGPAKEEPK_	3	773.652	145
Q3UHJ0	AP2-associated protein kinase 1	Aak1	0.500001	2	S	7.97214e-10	VGSLT(1)PPS(0.5)S(0.5)PK	_VGSLT(ph)PPS(ph)SPK_	2	615.264	621
Q3UHJ0	AP2-associated protein kinase 1	Aak1	0.500001	2	S	7.97214e-10	VGSLT(1)PPS(0.5)S(0.5)PK	_VGSLT(ph)PPS(ph)SPK_	2	615.264	622
A2ALS4		Rap1gap	0.5	1	S	3.35873e-07	RS(0.5)S(0.5)AIGIENIQEVQEK	_RS(ph)SAIGIENIQEVQEK_	3	627.642	562
A2ALS4		Rap1gap	0.5	1	S	3.35873e-07	RS(0.5)S(0.5)AIGIENIQEVQEK	_RS(ph)SAIGIENIQEVQEK_	3	627.642	563
A6MDD2	Receptor-type tyrosine-protein phosphatase-like N	Ptprn	0.5	1	S	0.000402781	AEDS(0.5)S(0.5)EGHEEEVLGGR	_AEDS(ph)SEGHEEEVLGGR_	3	594.239	310
Q9CYT6	Adenylyl cyclase-associated protein 2	Cap2	0.5	1	S	5.44636e-22	S(0.5)NS(0.5)PQKHTPVLELEGK	_S(ph)NSPQKHTPVLELEGK_	2	922.451	314
D3Z3B8		Dlg1	0.5	1	S	0.000234883	KGS(0.5)S(0.5)DELQAEPEPSR	_KGS(ph)SDELQAEPEPSR_	3	570.584	41
E9Q4N7		Arid1b	0.5	1	S	0.000507349	S(0.5)S(0.5)PALAAPDASVDPK	_S(ph)SPALAAPDASVDPK_	2	753.348	1756
E9Q4N7		Arid1b	0.5	1	S	0.000507349	S(0.5)S(0.5)PALAAPDASVDPK	_S(ph)SPALAAPDASVDPK_	2	753.348	1757
O35607	Bone morphogenetic protein receptor type-2	Bmpr2	0.5	1	S	0.0160239	LNINS(0.5)S(0.5)PDEHEPLLR	_LNINS(ph)SPDEHEPLLR_	3	605.288	862
O35633	Vesicular inhibitory amino acid transporter	Slc32a1	0.5	1	S	7.69319e-10	GGAPLPPS(0.5)GS(0.5)KDQAVGAGGEFGGHDKPK	_GGAPLPPS(ph)GSKDQAVGAGGEFGGHDKPK_	4	675.321	95
O55023	Inositol monophosphatase 1	Impa1	0.5	1	S	2.34621e-11	S(0.5)S(0.5)PADLVTVTDQKVEK	_S(ph)SPADLVTVTDQKVEK_	2	898.938	37
O55023	Inositol monophosphatase 1	Impa1	0.5	1	S	2.34621e-11	S(0.5)S(0.5)PADLVTVTDQKVEK	_S(ph)SPADLVTVTDQKVEK_	2	898.938	38
P26645	Myristoylated alanine-rich C-kinase substrate	Marcks	0.5	1	S	1.51652e-27	EAAEAEPAEPS(0.5)S(0.5)PAAEAEGASASSTSSPK	_EAAEAEPAEPS(ph)SPAAEAEGASASSTSSPK_	3	932.729	112
Q68EG2		Camk2b	0.5	1	S	0.030239	NFS(0.5)AKS(0.5)LLNK	_NFS(ph)AKSLLNK_	2	601.302	315
Q68EG2		Camk2b	0.5	1	S	0.030239	NFS(0.5)AKS(0.5)LLNK	_NFS(ph)AKSLLNK_	2	601.302	318
B2RW11		Ankrd34a	0.5	1	T	5.40457e-07	RHS(0.5)T(0.5)EGPEDPPPWAEK	_RHS(ph)TEGPEDPPPWAEK_	3	638.279	291
J3QNU6	Beta-arrestin-1	Arrb1	0.5	1	T	1.42336e-06	GMKDDKDEEDDGT(0.5)GS(0.5)PHLNNR	_GMKDDKDEEDDGT(ph)GSPHLNNR_	3	803.992	411
S4R291	Ankyrin-2	Ank2	0.499999	1	S	4.44641e-11	KT(0.5)S(0.5)LVIVESTDDQSQVFER	_KT(ph)SLVIVESTDDQSQVFER_	3	754.361	3781
S4R291	Ankyrin-2	Ank2	0.499999	1	T	4.44641e-11	KT(0.5)S(0.5)LVIVESTDDQSQVFER	_KT(ph)SLVIVESTDDQSQVFER_	3	754.361	3780
Q9QYC0	Alpha-adducin	Add1	0.499999	1	T	4.52445e-06	AAVVT(0.5)S(0.5)PPPTTAPHK	_AAVVT(ph)SPPPTTAPHK_	3	518.596	11
O70318	Band 4.1-like protein 2	Epb41l2	0.499992	1	S	0.0350467	MTTEVGS(0.5)AS(0.5)EVKK	_MTTEVGS(ph)ASEVKK_	2	723.831	7
O70318	Band 4.1-like protein 2	Epb41l2	0.499992	1	S	0.0350467	MTTEVGS(0.5)AS(0.5)EVKK	_MTTEVGS(ph)ASEVKK_	2	723.831	9
P16014	Secretogranin-1	Chgb	0.499991	1	S	0.00885357	WAS(0.5)S(0.5)REDAGAPVEDSQGQTK	_WAS(ph)SREDAGAPVEDSQGQTK_	3	733.65	99
P97379	Ras GTPase-activating protein-binding protein 2	G3bp2	0.499981	1	S	0.0119303	S(0.5)AT(0.5)PPPAEPASLPQEPPK	_S(ph)ATPPPAEPASLPQEPPK_	3	631.971	225
Q66JS6	Eukaryotic translation initiation factor 3 subunit J	Eif3j	0.499977	1	S	1.01813e-09	AAAAAAAAAAGDS(0.5)DS(0.5)WDADTFSMEDPVR	_(ac)AAAAAAAAAAGDS(ph)DSWDADTFSMEDPVR_	3	954.724	16
Q66JS6	Eukaryotic translation initiation factor 3 subunit J	Eif3j	0.499977	1	S	1.01813e-09	AAAAAAAAAAGDS(0.5)DS(0.5)WDADTFSMEDPVR	_(ac)AAAAAAAAAAGDS(ph)DSWDADTFSMEDPVR_	3	954.724	18
A6X919	Protein dpy-19 homolog 1	Dpy19l1	0.499963	1	S	5.42943e-25	S(0.5)S(0.5)PPPLSGASEVDAGELGSER	_S(ph)SPPPLSGASEVDAGELGSER_	2	1061.47	22
A6X919	Protein dpy-19 homolog 1	Dpy19l1	0.499963	1	S	5.42943e-25	S(0.5)S(0.5)PPPLSGASEVDAGELGSER	_S(ph)SPPPLSGASEVDAGELGSER_	2	1061.47	23
Q02248	Catenin beta-1	Ctnnb1	0.499961	1	T	7.0033e-06	T(0.5)S(0.5)MGGTQQQFVEGVR	_T(ph)SMGGTQQQFVEGVR_	2	852.874	551
A2AN08	E3 ubiquitin-protein ligase UBR4	Ubr4	0.499872		S	6.74204e-11	T(0.5)S(0.5)PADHGGSVGSESGGSAVDSVAGEHSVSGR	_T(ph)SPADHGGSVGSESGGSAVDSVAGEHSVSGR_	3	974.083	2882
A2AN08	E3 ubiquitin-protein ligase UBR4	Ubr4	0.499872		T	6.74204e-11	T(0.5)S(0.5)PADHGGSVGSESGGSAVDSVAGEHSVSGR	_T(ph)SPADHGGSVGSESGGSAVDSVAGEHSVSGR_	3	974.083	2881
B1AQX7	SRC kinase signaling inhibitor 1	Srcin1	0.499855		S	0.000105599	GEPDPERS(0.5)S(0.5)PPMLSADDAEYPR	_GEPDPERS(ph)SPPMLSADDAEYPR_	3	832.684	46
D3Z5K8	SH3 and multiple ankyrin repeat domains protein 2	Shank2	0.499802		S	4.1219e-08	RNSPAFLS(0.5)T(0.5)DLGDEDVGLGPPAPR	_RNSPAFLS(ph)TDLGDEDVGLGPPAPR_	3	854.406	1094
D3Z5K8	SH3 and multiple ankyrin repeat domains protein 2	Shank2	0.499802		T	4.1219e-08	RNSPAFLS(0.5)T(0.5)DLGDEDVGLGPPAPR	_RNSPAFLS(ph)TDLGDEDVGLGPPAPR_	3	854.406	1095
G3UYQ8		Usp10	0.49967		S	0.0109995	LGLMAGY(0.001)ES(0.5)MT(0.5)K	_LGLM(ox)AGYES(ph)MTK_	2	698.798	75
G3UYQ8		Usp10	0.49967		T	0.0109995	LGLMAGY(0.001)ES(0.5)MT(0.5)K	_LGLM(ox)AGYES(ph)MTK_	2	698.798	77
Q8VD37	SH3-containing GRB2-like protein 3-interacting protein 1	Sgip1	0.499633		S	5.95501e-12	YNSPELDEEGYS(0.001)IRPEEPGS(0.5)T(0.5)K	_YNSPELDEEGYSIRPEEPGS(ph)TK_	3	859.706	95
Q8VD37	SH3-containing GRB2-like protein 3-interacting protein 1	Sgip1	0.499633		T	5.95501e-12	YNSPELDEEGYS(0.001)IRPEEPGS(0.5)T(0.5)K	_YNSPELDEEGYSIRPEEPGS(ph)TK_	3	859.706	96
Q8VD63	Testis-specific Y-encoded-like protein 4	Tspyl4	0.499406		S	0.0137604	GLEDAPS(0.499)PS(0.499)KGGDAPS(0.001)APVAADDSSK	_GLEDAPS(ph)PSKGGDAPSAPVAADDSSK_	3	836.038	87
Q8VD63	Testis-specific Y-encoded-like protein 4	Tspyl4	0.499406		S	0.0137604	GLEDAPS(0.499)PS(0.499)KGGDAPS(0.001)APVAADDSSK	_GLEDAPS(ph)PSKGGDAPSAPVAADDSSK_	3	836.038	89
Q80T32	Probable G-protein coupled receptor 133	Gpr133	0.499211		S	0.0184287	VWS(0.003)LT(0.499)S(0.499)S(0.499)S(0.499)AR	_VWSLT(ph)S(ph)SSAR_	2	627.252	859
Q80T32	Probable G-protein coupled receptor 133	Gpr133	0.499211		T	0.0184287	VWS(0.003)LT(0.499)S(0.499)S(0.499)S(0.499)AR	_VWSLT(ph)S(ph)SSAR_	2	627.252	856
Q5EG47	5'-AMP-activated protein kinase catalytic subunit alpha-1	Prkaa1	0.498993		S	0.000305434	DFY(0.002)LAT(0.499)S(0.499)PPDSFLDDHHLTRPHPER	_DFYLAT(ph)SPPDSFLDDHHLTRPHPER_	4	761.599	356
Q5EG47	5'-AMP-activated protein kinase catalytic subunit alpha-1	Prkaa1	0.498993		T	0.000305434	DFY(0.002)LAT(0.499)S(0.499)PPDSFLDDHHLTRPHPER	_DFYLAT(ph)SPPDSFLDDHHLTRPHPER_	4	761.599	355
Q3UHJ0	AP2-associated protein kinase 1	Aak1	0.498982		S	0.000542119	NS(0.499)S(0.499)GS(0.002)SESSLPNLAR	_NS(ph)SGSSESSLPNLAR_	2	793.346	935
Q3UHJ0	AP2-associated protein kinase 1	Aak1	0.498982		S	0.000542119	NS(0.499)S(0.499)GS(0.002)SESSLPNLAR	_NS(ph)SGSSESSLPNLAR_	2	793.346	936
Q60598	Src substrate cortactin	Cttn	0.498711		S	3.37203e-20	KQT(1)PPASPSPQPIEDRPPS(0.499)S(0.499)PIY(0.003)EDAAPFK	_KQT(ph)PPASPSPQPIEDRPPS(ph)SPIYEDAAPFK_	3	1136.52	417
Q60598	Src substrate cortactin	Cttn	0.498711		S	3.37203e-20	KQT(1)PPASPSPQPIEDRPPS(0.499)S(0.499)PIY(0.003)EDAAPFK	_KQT(ph)PPASPSPQPIEDRPPS(ph)SPIYEDAAPFK_	3	1136.52	418
Q5XG69	Protein FAM169A	Fam169a	0.49813		S	6.31621e-12	SQSEEQS(0.003)EAS(0.498)S(0.498)EHLEQFTQSAEK	_SQSEEQSEAS(ph)SEHLEQFTQSAEK_	3	892.703	613
Q5XG69	Protein FAM169A	Fam169a	0.49813		S	6.31621e-12	SQSEEQS(0.003)EAS(0.498)S(0.498)EHLEQFTQSAEK	_SQSEEQSEAS(ph)SEHLEQFTQSAEK_	3	892.703	614
Q61609	Sodium-dependent phosphate transporter 1	Slc20a1	0.498052		S	0.0238987	S(0.498)S(0.498)PS(0.015)ES(0.989)PLMEK	_S(ph)SPSES(ph)PLMEK_	2	676.248	268
Q80VP1	Epsin-1	Epn1	0.497914		S	3.50524e-07	SPGAFDMSGVGGS(0.004)LAES(0.498)VGS(0.498)PPPAATPTPTPPTR	_SPGAFDMSGVGGSLAES(ph)VGSPPPAATPTPTPPTR_	4	819.134	450
Q80VP1	Epsin-1	Epn1	0.497914		S	3.50524e-07	SPGAFDMSGVGGS(0.004)LAES(0.498)VGS(0.498)PPPAATPTPTPPTR	_SPGAFDMSGVGGSLAES(ph)VGSPPPAATPTPTPPTR_	4	819.134	453
P61982	14-3-3 protein gamma	Ywhag	0.497677		T	0.00964089	DNLT(0.005)LWT(0.498)S(0.498)DQQDDDGGEGNN	_DNLTLWT(ph)SDQQDDDGGEGNN_	2	1137.43	234
Q91XF0	Pyridoxine-5'-phosphate oxidase	Pnpo	0.497541		T	0.0131777	GLAT(0.498)GDS(0.498)PLGPMT(0.005)HHGEEDWVYER	_GLAT(ph)GDSPLGPMTHHGEEDWVYER_	4	684.296	238
A2A5Y6	Microtubule-associated protein	Mapt	0.497221		S	2.80065e-10	S(0.497)T(0.497)PT(0.006)AEDVTAPLVDER	_S(ph)TPTAEDVTAPLVDER_	2	890.904	57
A2A5Y6	Microtubule-associated protein	Mapt	0.497221		T	2.80065e-10	S(0.497)T(0.497)PT(0.006)AEDVTAPLVDER	_S(ph)TPTAEDVTAPLVDER_	2	890.904	58
P70670	Nascent polypeptide-associated complex subunit alpha, muscle-specific form	Naca	0.497194		T	2.70295e-17	VQGEAVSNIQENT(0.001)QT(0.005)PT(0.497)VQEES(0.497)EEEEVDETGVEVK	_VQGEAVSNIQENTQTPT(ph)VQEESEEEEVDETGVEVK_	4	985.939	2133
Q922Y1	UBX domain-containing protein 1	Ubxn1	0.497149		S	5.03929e-05	S(0.497)S(0.497)PPAT(0.006)DPGPVPSSPSQEPPTKR	_S(ph)SPPATDPGPVPSSPSQEPPTKR_	3	799.376	187
Q922Y1	UBX domain-containing protein 1	Ubxn1	0.497149		S	5.03929e-05	S(0.497)S(0.497)PPAT(0.006)DPGPVPSSPSQEPPTKR	_S(ph)SPPATDPGPVPSSPSQEPPTKR_	3	799.376	188
G3UWV4	Serine/threonine-protein kinase BRSK2	Brsk2	0.497042		S	0.00447885	KLQVPTPEEMSNLT(0.006)PES(0.497)S(0.497)PELAK	_KLQVPTPEEMSNLTPES(ph)SPELAK_	3	869.087	535
G3UWV4	Serine/threonine-protein kinase BRSK2	Brsk2	0.497042		S	0.00447885	KLQVPTPEEMSNLT(0.006)PES(0.497)S(0.497)PELAK	_KLQVPTPEEMSNLTPES(ph)SPELAK_	3	869.087	536
Q9D5V6	Synapse-associated protein 1	Syap1	0.4965		S	0.000314058	LSAGAAPS(0.496)EES(0.496)PERPVEPT(0.005)EEQQQQPPT(0.002)EDPQFLHQAK	_LSAGAAPS(ph)EESPERPVEPTEEQQQQPPTEDPQFLHQAK_	4	1066.49	39
Q9D5V6	Synapse-associated protein 1	Syap1	0.4965		S	0.000314058	LSAGAAPS(0.496)EES(0.496)PERPVEPT(0.005)EEQQQQPPT(0.002)EDPQFLHQAK	_LSAGAAPS(ph)EESPERPVEPTEEQQQQPPTEDPQFLHQAK_	4	1066.49	42
Q8VD37	SH3-containing GRB2-like protein 3-interacting protein 1	Sgip1	0.494453		T	4.30187e-11	T(0.157)VPAT(0.83)PPRT(0.494)GS(0.494)PLT(0.024)VATGNDQAATEAK	_TVPAT(ph)PPRT(ph)GSPLTVATGNDQAATEAK_	3	937.77	263
Q80X80	C2 domain-containing protein 2-like	C2cd2l	0.494171		S	3.59519e-10	LDS(0.009)PS(0.494)RS(0.494)PS(0.003)KVEVTEK	_LDSPS(ph)RSPSKVEVTEK_	3	613.635	466
Q9QYB8	Beta-adducin	Add2	0.493633		S	0.00182459	S(0.006)AGPQS(0.012)QLLAS(0.576)VIAEKS(0.658)RS(0.494)PS(0.459)T(0.464)ES(0.29)QLMS(0.042)K	_SAGPQSQLLAS(ph)VIAEKS(ph)RS(ph)PSTESQLMSK_	3	1086.49	530
Q80TB8	Synaptic vesicle membrane protein VAT-1 homolog-like	Vat1l	0.492318		T	1.07925e-21	TPTPLMANDS(0.492)T(0.492)ET(0.013)S(0.003)EAGEEEEDHEGDSENK	_TPTPLMANDS(ph)TETSEAGEEEEDHEGDSENK_	3	1110.43	391
K3W4S4	C-Jun-amino-terminal kinase-interacting protein 3	Mapk8ip3	0.491482		T	0.00177901	T(0.491)S(0.491)PT(0.016)S(0.001)GEGTRPGGIIHVYGDDSSDK	_T(ph)SPTSGEGTRPGGIIHVYGDDSSDK_	3	871.72	1199
Q80TM6	R3H domain-containing protein 2	R3hdm2	0.491295		S	4.76716e-07	SLEPRPWS(0.491)S(0.491)T(0.017)DSDGSVR	_SLEPRPWS(ph)STDSDGSVR_	2	978.428	361
Q80TM6	R3H domain-containing protein 2	R3hdm2	0.491295		S	4.76716e-07	SLEPRPWS(0.491)S(0.491)T(0.017)DSDGSVR	_SLEPRPWS(ph)STDSDGSVR_	2	978.428	362
E9Q0J5	Kinesin-like protein KIF21A	Kif21a	0.491001		S	0.00279901	HSDS(0.003)GAS(0.038)ET(0.05)S(0.197)LS(0.713)PPS(0.491)S(0.491)PPS(0.017)RPR	_HSDSGASETSLS(ph)PPS(ph)SPPSRPR_	3	799.335	1276
E9Q0J5	Kinesin-like protein KIF21A	Kif21a	0.491001		S	0.00279901	HSDS(0.003)GAS(0.038)ET(0.05)S(0.197)LS(0.713)PPS(0.491)S(0.491)PPS(0.017)RPR	_HSDSGASETSLS(ph)PPS(ph)SPPSRPR_	3	799.335	1277
G5E884	Serine/threonine-protein kinase PAK 1	Pak1	0.489307		T	0.0139918	DVAT(0.002)S(0.016)PIS(0.438)PT(0.489)ENNT(0.043)T(0.011)PPDALTR	_DVATSPISPT(ph)ENNTTPPDALTR_	3	793.035	224
Q80U49	Protein KIAA0284	Kiaa0284	0.488593		T	0.0351831	GHKHEDGT(0.489)QS(0.489)DS(0.023)EDPLAK	_GHKHEDGT(ph)QSDSEDPLAK_	4	508.467	358
Q3UNH4	G protein-regulated inducer of neurite outgrowth 1	Gprin1	0.487018		S	0.0168037	VITQIPGAT(0.487)S(0.487)PGKVET(0.019)PS(0.007)LQK	_VITQIPGAT(ph)SPGKVETPSLQK_	3	744.394	576
Q3UNH4	G protein-regulated inducer of neurite outgrowth 1	Gprin1	0.487018		T	0.0168037	VITQIPGAT(0.487)S(0.487)PGKVET(0.019)PS(0.007)LQK	_VITQIPGAT(ph)SPGKVETPSLQK_	3	744.394	575
Q5RJI5	Serine/threonine-protein kinase BRSK1	Brsk1	0.486731		S	0.0322581	MQVPTAEEMS(0.002)S(0.002)LT(0.023)PES(0.487)S(0.487)PELAK	_MQVPTAEEMSSLTPES(ph)SPELAK_	3	814.699	587
O88737	Protein bassoon	Bsn	0.482646		S	1.97806e-07	SHGPLLPT(0.035)IEDS(0.483)S(0.483)EEEELREEEELLR	_SHGPLLPTIEDS(ph)SEEEELREEEELLR_	3	1039.48	1050
O88737	Protein bassoon	Bsn	0.482646		S	1.97806e-07	SHGPLLPT(0.035)IEDS(0.483)S(0.483)EEEELREEEELLR	_SHGPLLPTIEDS(ph)SEEEELREEEELLR_	3	1039.48	1051
Q8BL00	Cadherin-related family member 3	Cdhr3	0.481323		T	0.017578	AVY(0.395)RHCS(0.605)S(0.481)T(0.481)T(0.037)R	_AVYRHCS(ph)S(ph)TTR_	2	720.778	743
Q8BL00	Cadherin-related family member 3	Cdhr3	0.481322		S	0.017578	AVY(0.395)RHCS(0.605)S(0.481)T(0.481)T(0.037)R	_AVYRHCS(ph)S(ph)TTR_	2	720.778	742
G3UYM7		Dtnb	0.47885		T	0.00222938	QAAQAT(0.662)GS(0.338)PHT(0.479)S(0.429)PT(0.093)HGGGRPMPMPVR	_QAAQAT(ph)GSPHT(ph)SPTHGGGRPMPMPVR_	3	929.407	534
A2A517	Cytohesin-1	Cyth1	0.473887		S	0.0137136	LKEEIAEVANEIES(0.112)LGS(0.474)T(0.414)EERK	_LKEEIAEVANEIESLGS(ph)TEERK_	3	852.081	67
Q9JKC6	Cell cycle exit and neuronal differentiation protein 1	Cend1	0.47274		S	6.37021e-17	S(0.055)AS(0.473)S(0.473)PKPDTKVPQATAEAK	_SAS(ph)SPKPDTKVPQATAEAK_	2	996.986	9
Q9JKC6	Cell cycle exit and neuronal differentiation protein 1	Cend1	0.47274		S	6.37021e-17	S(0.055)AS(0.473)S(0.473)PKPDTKVPQATAEAK	_SAS(ph)SPKPDTKVPQATAEAK_	2	996.986	10
Q9Z0H8	CAP-Gly domain-containing linker protein 2	Clip2	0.471434		S	0.0192696	IGFPS(0.057)T(0.471)S(0.471)PAK	_IGFPST(ph)SPAK_	2	542.757	295
Q9Z0H8	CAP-Gly domain-containing linker protein 2	Clip2	0.471434		T	0.0192696	IGFPS(0.057)T(0.471)S(0.471)PAK	_IGFPST(ph)SPAK_	2	542.757	294
Q8C0J2	Autophagy-related protein 16-1	Atg16l1	0.471207		S	0.00172476	ELAEAAKEPLPVEQDDDIEVIVDET(0.009)S(0.009)DHT(0.04)EET(0.471)S(0.471)PVR	_ELAEAAKEPLPVEQDDDIEVIVDETSDHTEET(ph)SPVR_	4	1022.22	255
Q8C0J2	Autophagy-related protein 16-1	Atg16l1	0.471207		T	0.00172476	ELAEAAKEPLPVEQDDDIEVIVDET(0.009)S(0.009)DHT(0.04)EET(0.471)S(0.471)PVR	_ELAEAAKEPLPVEQDDDIEVIVDETSDHTEET(ph)SPVR_	4	1022.22	254
P97445	Voltage-dependent P/Q-type calcium channel subunit alpha-1A	Cacna1a	0.469571		S	0.00892755	MEPPS(0.47)PT(0.47)QEGGPS(0.055)QNALPS(0.003)T(0.003)QLDPGGGLMAHEGGMK	_MEPPS(ph)PTQEGGPSQNALPSTQLDPGGGLMAHEGGMK_	4	921.66	1946
P97445	Voltage-dependent P/Q-type calcium channel subunit alpha-1A	Cacna1a	0.469571		T	0.00892755	MEPPS(0.47)PT(0.47)QEGGPS(0.055)QNALPS(0.003)T(0.003)QLDPGGGLMAHEGGMK	_MEPPS(ph)PTQEGGPSQNALPSTQLDPGGGLMAHEGGMK_	4	921.66	1948
O08599	Syntaxin-binding protein 1	Stxbp1	0.469514		S	0.0387828	S(0.47)S(0.47)AS(0.059)FS(0.002)TTAVSAR	_S(ph)SASFSTTAVSAR_	2	676.298	506
O08599	Syntaxin-binding protein 1	Stxbp1	0.469514		S	0.0387828	S(0.47)S(0.47)AS(0.059)FS(0.002)TTAVSAR	_S(ph)SASFSTTAVSAR_	2	676.298	507
Q8JZQ9	Eukaryotic translation initiation factor 3 subunit B	Eif3b	0.466442		T	0.00329082	AKPAAQS(0.698)EEET(0.361)AT(0.466)S(0.466)PAAS(0.007)PT(0.001)PQSAER	_AKPAAQS(ph)EEETAT(ph)SPAASPTPQSAER_	3	924.73	74
E9Q0J5	Kinesin-like protein KIF21A	Kif21a	0.463043		S	6.94403e-12	KLS(0.232)S(0.291)S(0.463)ES(0.014)PAPDTGSSAASGEADTSRPGTQQK	_KLSSS(ph)ESPAPDTGSSAASGEADTSRPGTQQK_	4	779.352	857
Q3UHJ0	AP2-associated protein kinase 1	Aak1	0.46299		S	0.000584562	REQGSS(0.001)GLGS(0.031)GS(0.463)S(0.463)GGGGS(0.031)S(0.008)S(0.002)GLGSGYIGR	_REQGSSGLGSGS(ph)SGGGGSSSGLGSGYIGR_	3	880.054	20
Q3UHJ0	AP2-associated protein kinase 1	Aak1	0.46299		S	0.000584562	REQGSS(0.001)GLGS(0.031)GS(0.463)S(0.463)GGGGS(0.031)S(0.008)S(0.002)GLGSGYIGR	_REQGSSGLGSGS(ph)SGGGGSSSGLGSGYIGR_	3	880.054	21
A2ARP8	Microtubule-associated protein 1A	Mtap1a	0.459684		T	2.25216e-12	ET(0.46)S(0.46)PT(0.081)RGEPVPAWEGKS(1)PEQEVR	_ET(ph)SPTRGEPVPAWEGKS(ph)PEQEVR_	3	909.4	1871
Q99P72	Reticulon-4	Rtn4	0.45745		S	0.00140867	ES(0.457)ET(0.213)FS(0.331)DS(0.316)S(0.683)PIEIIDEFPTFVSAK	_ES(ph)ETFSDSS(ph)PIEIIDEFPTFVSAK_	3	945.736	832
Q8VD37	SH3-containing GRB2-like protein 3-interacting protein 1	Sgip1	0.453035		S	1.33624e-05	DT(0.394)DS(0.453)T(0.246)GS(0.907)PDRDGMQPSPHEPPYHSK	_DTDS(ph)TGS(ph)PDRDGMQPSPHEPPYHSK_	3	966.707	24
P20357	Microtubule-associated protein 2	Map2	0.452503		S	3.41002e-05	KQS(0.453)T(0.453)EPS(0.095)IVMPSIGLSAEPPAPK	_KQS(ph)TEPSIVMPSIGLSAEPPAPK_	3	815.41	238
P20357	Microtubule-associated protein 2	Map2	0.452503		T	3.41002e-05	KQS(0.453)T(0.453)EPS(0.095)IVMPSIGLSAEPPAPK	_KQS(ph)TEPSIVMPSIGLSAEPPAPK_	3	815.41	239
Q99NH0	Ankyrin repeat domain-containing protein 17	Ankrd17	0.451629		S	0.00629016	EHYPVS(0.358)S(0.358)PS(0.452)S(0.452)PS(0.378)PPAQPGGVS(0.003)R	_EHYPVS(ph)SPS(ph)SPSPPAQPGGVSR_	3	794.005	2040
Q99NH0	Ankyrin repeat domain-containing protein 17	Ankrd17	0.451629		S	0.00629016	EHYPVS(0.358)S(0.358)PS(0.452)S(0.452)PS(0.378)PPAQPGGVS(0.003)R	_EHYPVS(ph)SPS(ph)SPSPPAQPGGVSR_	3	794.005	2041
Q69ZR2	E3 ubiquitin-protein ligase HECTD1	Hectd1	0.450262		S	0.000690698	VSALAGPS(0.45)S(0.45)DDENEEES(0.099)KPEKEDEPQEDAK	_VSALAGPS(ph)SDDENEEESKPEKEDEPQEDAK_	4	835.603	632
B2RRE2	Unconventional myosin-XVIIIa	Myo18a	0.448959		S	3.70927e-07	S(0.26)S(0.282)S(0.449)PT(0.005)S(0.005)HWKPLAPDPS(0.995)DDEHDPVDS(0.002)IS(0.003)RPR	_SSS(ph)PTSHWKPLAPDPS(ph)DDEHDPVDSISRPR_	4	868.877	2000
Q5SUH6	Clathrin interactor 1	Clint1	0.446698		S	0.0352992	TIDLGAAAHY(0.08)T(0.197)GDKAS(0.447)PDQNAS(0.089)T(0.089)HT(0.038)PQS(0.026)S(0.026)AKPS(0.005)VPS(0.002)S(0.002)K	_TIDLGAAAHYTGDKAS(ph)PDQNASTHTPQSSAKPSVPSSK_	4	976.46	299
A2ARP8	Microtubule-associated protein 1A	Mtap1a	0.44666		T	0.0158932	ET(0.107)S(0.447)PT(0.447)RGEPVPAWEGK	_ETS(ph)PTRGEPVPAWEGK_	3	607.612	1874
F6SEU4	Ras GTPase-activating protein SynGAP	Syngap1	0.445703		S	2.01947e-07	HFTEQWYPVTLPT(0.181)GS(0.37)GGS(0.446)GGMGS(0.003)GGGGGSGGGSGGK	_HFTEQWYPVTLPTGSGGS(ph)GGMGSGGGGGSGGGSGGK_	3	1102.47	374
D3YWR0	GRAM domain-containing protein 1B	Gramd1b	0.443087		S	4.84484e-11	S(0.443)RS(0.443)PT(0.114)PQNQDGDTMVEK	_S(ph)RSPTPQNQDGDTMVEK_	3	657.282	55
D3YWR0	GRAM domain-containing protein 1B	Gramd1b	0.443087		S	4.84484e-11	S(0.443)RS(0.443)PT(0.114)PQNQDGDTMVEK	_S(ph)RSPTPQNQDGDTMVEK_	3	657.282	57
P06837	Neuromodulin	Gap43	0.442924		T	0.00326372	EGDGS(0.065)AT(0.005)T(0.016)DAAPAT(0.443)S(0.443)PKAEEPS(0.028)KAGDAPSEEK	_EGDGSATTDAAPAT(ph)SPKAEEPSKAGDAPSEEK_	4	796.098	95
E9PX29		Spnb4	0.442611		T	0.0158968	WGQT(0.001)LPT(0.302)T(0.443)S(0.434)S(0.413)T(0.407)DEGNPKR	_WGQTLPTT(ph)S(ph)STDEGNPKR_	2	1067.95	2539
Q3TVI8	Pre-B-cell leukemia transcription factor-interacting protein 1	Pbxip1	0.441355		S	0.0115439	GREPS(0.441)S(0.441)S(0.117)QPVVPVDVEDQAK	_GREPS(ph)SSQPVVPVDVEDQAK_	3	735.346	164
Q3TVI8	Pre-B-cell leukemia transcription factor-interacting protein 1	Pbxip1	0.441355		S	0.0115439	GREPS(0.441)S(0.441)S(0.117)QPVVPVDVEDQAK	_GREPS(ph)SSQPVVPVDVEDQAK_	3	735.346	165
P20357	Microtubule-associated protein 2	Map2	0.441159		S	0.0240801	ET(0.059)S(0.059)PET(0.441)S(0.441)LIQDEVALK	_ETSPET(ph)SLIQDEVALK_	3	613.959	1165
P20357	Microtubule-associated protein 2	Map2	0.441159		T	0.0240801	ET(0.059)S(0.059)PET(0.441)S(0.441)LIQDEVALK	_ETSPET(ph)SLIQDEVALK_	3	613.959	1164
A2A543	Voltage-dependent L-type calcium channel subunit beta-1	Cacnb1	0.436565		S	0.00979081	AT(0.025)HPPS(0.102)S(0.437)T(0.437)PPNPLLNR	_ATHPPSS(ph)TPPNPLLNR_	3	593.624	417
A2ARP8	Microtubule-associated protein 1A	Mtap1a	0.435202		T	3.5898e-06	TEATQGLDY(0.001)VPS(0.12)AGT(0.435)IS(0.435)PT(0.005)S(0.002)S(0.001)LEEDKGFK	_TEATQGLDYVPSAGT(ph)ISPTSSLEEDKGFK_	4	777.863	1131
E9PX29		Spnb4	0.433588		S	0.0158968	WGQT(0.001)LPT(0.302)T(0.443)S(0.434)S(0.413)T(0.407)DEGNPKR	_WGQTLPTT(ph)S(ph)STDEGNPKR_	2	1067.95	2540
O88737	Protein bassoon	Bsn	0.427643		S	5.13329e-26	SRGEHSSTLPASTPSYTSGTSPT(0.023)S(0.023)LS(0.053)S(0.053)LEEDS(0.029)DS(0.428)S(0.311)PS(0.08)RR	_SRGEHSSTLPASTPSYTSGTSPTSLSSLEEDSDS(ph)SPSRR_	4	1030.96	1018
Q8K221	Arfaptin-2	Arfip2	0.42676		S	0.000305829	HPS(0.073)HS(0.427)T(0.073)S(0.427)PS(0.001)GPGDEVAR	_HPSHS(ph)TSPSGPGDEVAR_	3	599.923	74
Q8K221	Arfaptin-2	Arfip2	0.42676		S	0.000305829	HPS(0.073)HS(0.427)T(0.073)S(0.427)PS(0.001)GPGDEVAR	_HPSHS(ph)TSPSGPGDEVAR_	3	599.923	76
E9Q3M9		2010300C02Rik	0.425666		S	0.0119533	ALVT(0.12)S(0.426)GS(0.426)PAES(0.029)PLKEPGPAVQDK	_ALVTS(ph)GSPAESPLKEPGPAVQDK_	3	786.724	728
E9Q3M9		2010300C02Rik	0.425666		S	0.0119533	ALVT(0.12)S(0.426)GS(0.426)PAES(0.029)PLKEPGPAVQDK	_ALVTS(ph)GSPAESPLKEPGPAVQDK_	3	786.724	730
A0JNY3	Gephyrin	Gphn	0.422134		T	0.000293444	EVHDELEDLPS(0.967)PPPPLS(0.705)PPPT(0.422)T(0.397)S(0.375)PHKQT(0.134)EDK	_EVHDELEDLPS(ph)PPPPLS(ph)PPPT(ph)TSPHKQTEDK_	4	914.398	198
P26645	Myristoylated alanine-rich C-kinase substrate	Marcks	0.421074		S	0.0147235	GEAT(0.033)AERPGEAAVAS(0.421)S(0.421)PS(0.125)KANGQENGHVK	_GEATAERPGEAAVAS(ph)SPSKANGQENGHVK_	4	733.091	26
Q8BPN8	DmX-like protein 2	Dmxl2	0.420996		T	0.00873132	MKLDHELS(0.097)LDRES(0.141)EAGT(0.421)GS(0.17)S(0.17)EHEDGER	_MKLDHELSLDRESEAGT(ph)GSSEHEDGER_	4	774.332	460
F8VQC1		Srp72	0.419137		S	0.00169475	AVS(0.524)S(0.465)PPT(0.419)S(0.419)PRPGS(0.127)AAT(0.04)IS(0.004)S(0.001)S(0.001)ASNIVPPR	_AVS(ph)SPPT(ph)SPRPGSAATISSSASNIVPPR_	3	951.118	625
F8VQC1		Srp72	0.419137		T	0.00169475	AVS(0.524)S(0.465)PPT(0.419)S(0.419)PRPGS(0.127)AAT(0.04)IS(0.004)S(0.001)S(0.001)ASNIVPPR	_AVS(ph)SPPT(ph)SPRPGSAATISSSASNIVPPR_	3	951.118	624
Q99J21	Mucolipin-1	Mcoln1	0.41862		T	0.00391555	LLTPNPGY(0.001)GT(0.007)QVGT(0.028)S(0.028)PAPT(0.419)T(0.419)PT(0.099)EEEDLRR	_LLTPNPGYGTQVGTSPAPT(ph)TPTEEEDLRR_	3	1059.84	33
Q99J21	Mucolipin-1	Mcoln1	0.41862		T	0.00391555	LLTPNPGY(0.001)GT(0.007)QVGT(0.028)S(0.028)PAPT(0.419)T(0.419)PT(0.099)EEEDLRR	_LLTPNPGYGTQVGTSPAPT(ph)TPTEEEDLRR_	3	1059.84	34
E9PVY8	Microtubule-actin cross-linking factor 1	Macf1	0.418028		S	0.00386865	EAEEELAAS(0.418)GGQS(0.418)PT(0.164)GEQIPQFQQR	_EAEEELAAS(ph)GGQSPTGEQIPQFQQR_	3	923.078	5548
E9PVY8	Microtubule-actin cross-linking factor 1	Macf1	0.418028		S	0.00386865	EAEEELAAS(0.418)GGQS(0.418)PT(0.164)GEQIPQFQQR	_EAEEELAAS(ph)GGQSPTGEQIPQFQQR_	3	923.078	5552
P14873	Microtubule-associated protein 1B	Map1b	0.413993		S	0.00178099	DVS(0.076)DERLS(0.923)PAKS(0.395)PS(0.414)LS(0.207)PS(0.397)PPS(0.588)PIEK	_DVSDERLS(ph)PAKS(ph)PSLSPSPPS(ph)PIEK_	3	954.087	1253
Q9JM13	Rab5 GDP/GTP exchange factor	Rabgef1	0.411862		S	5.83533e-12	LDAQSLNLSQEDFDRY(0.001)MS(0.175)GQT(0.412)S(0.412)PR	_LDAQSLNLSQEDFDRYMSGQT(ph)SPR_	3	946.752	390
Q9JM13	Rab5 GDP/GTP exchange factor	Rabgef1	0.411862		T	5.83533e-12	LDAQSLNLSQEDFDRY(0.001)MS(0.175)GQT(0.412)S(0.412)PR	_LDAQSLNLSQEDFDRYMSGQT(ph)SPR_	3	946.752	389
Z4YJR7	Sorbin and SH3 domain-containing protein 2	Sorbs2	0.41102		S	1.13209e-05	GAEDYPDPPLPHS(0.411)YS(0.262)S(0.327)DR	_GAEDYPDPPLPHS(ph)YSSDR_	2	1041.93	994
P17710	Hexokinase-1	Hk1	0.410761		S	0.0340625	GKFT(0.178)T(0.411)S(0.411)DVAAIETDKEGVQNAK	_GKFTT(ph)SDVAAIETDKEGVQNAK_	3	797.048	393
P17710	Hexokinase-1	Hk1	0.410761		T	0.0340625	GKFT(0.178)T(0.411)S(0.411)DVAAIETDKEGVQNAK	_GKFTT(ph)SDVAAIETDKEGVQNAK_	3	797.048	392
O54916	RalBP1-associated Eps domain-containing protein 1	Reps1	0.408058		S	0.00545794	RQS(0.15)S(0.405)S(0.408)Y(0.037)EDPWK	_RQSSS(ph)YEDPWK_	2	731.804	274
Q8VEF1	GRAM domain-containing protein 1A	Gramd1a	0.406998		S	1.4608e-10	EVGDVIALSDIS(0.002)PS(0.407)GAADHS(0.29)QEPS(0.29)PVGS(0.011)R	_EVGDVIALSDISPS(ph)GAADHSQEPSPVGSR_	3	986.456	259
Q9QZS3	Protein numb homolog	Numb	0.404671		S	0.000677096	T(0.002)VVGPS(0.009)VAPGNT(0.056)APS(0.154)PS(0.403)S(0.403)PT(0.403)S(0.405)PT(0.148)PDGT(0.008)AS(0.004)S(0.004)EMNNPHAIPR	_TVVGPSVAPGNTAPSPS(ph)S(ph)PTSPTPDGTASSEMNNPHAIPR_	4	1011.45	244
Q80TB8	Synaptic vesicle membrane protein VAT-1 homolog-like	Vat1l	0.403591		S	1.20336e-10	TPTPLMANDS(0.096)T(0.096)ET(0.404)S(0.404)EAGEEEEDHEGDSENK	_TPTPLMANDSTET(ph)SEAGEEEEDHEGDSENK_	3	1110.43	394
Q9QZS3	Protein numb homolog	Numb	0.403188		S	0.000677096	T(0.002)VVGPS(0.009)VAPGNT(0.056)APS(0.154)PS(0.403)S(0.403)PT(0.403)S(0.405)PT(0.148)PDGT(0.008)AS(0.004)S(0.004)EMNNPHAIPR	_TVVGPSVAPGNTAPSPS(ph)S(ph)PTSPTPDGTASSEMNNPHAIPR_	4	1011.45	241
Q9QZS3	Protein numb homolog	Numb	0.40312		S	0.000677096	T(0.002)VVGPS(0.009)VAPGNT(0.056)APS(0.154)PS(0.403)S(0.403)PT(0.403)S(0.405)PT(0.148)PDGT(0.008)AS(0.004)S(0.004)EMNNPHAIPR	_TVVGPSVAPGNTAPSPS(ph)S(ph)PTSPTPDGTASSEMNNPHAIPR_	4	1011.45	240
Q9QZS3	Protein numb homolog	Numb	0.403056		T	0.000677096	T(0.002)VVGPS(0.009)VAPGNT(0.056)APS(0.154)PS(0.403)S(0.403)PT(0.403)S(0.405)PT(0.148)PDGT(0.008)AS(0.004)S(0.004)EMNNPHAIPR	_TVVGPSVAPGNTAPSPS(ph)S(ph)PTSPTPDGTASSEMNNPHAIPR_	4	1011.45	243
Q9JKC6	Cell cycle exit and neuronal differentiation protein 1	Cend1	0.395833		S	0.00087174	ADPVLLNNHSNLKPAPT(0.005)VPAAPS(0.396)S(0.396)PDAT(0.098)S(0.098)EPKGPGDGAEEDES(0.004)NT(0.004)GGR	_ADPVLLNNHSNLKPAPTVPAAPS(ph)SPDATSEPKGPGDGAEEDESNTGGR_	4	1211.81	89
O08919	Numb-like protein	Numbl	0.394253		S	4.28845e-12	AEAAAAPAVAPGPAQPGHVS(0.394)PT(0.394)PAT(0.394)T(0.394)S(0.394)PGEKGEAGT(0.028)PVAAGT(0.001)TAAAIPR	_AEAAAAPAVAPGPAQPGHVS(ph)PT(ph)PATTSPGEKGEAGTPVAAGTTAAAIPR_	4	1147.55	270
O08919	Numb-like protein	Numbl	0.394253		T	4.28845e-12	AEAAAAPAVAPGPAQPGHVS(0.394)PT(0.394)PAT(0.394)T(0.394)S(0.394)PGEKGEAGT(0.028)PVAAGT(0.001)TAAAIPR	_AEAAAAPAVAPGPAQPGHVS(ph)PT(ph)PATTSPGEKGEAGTPVAAGTTAAAIPR_	4	1147.55	265
O08919	Numb-like protein	Numbl	0.394253		T	4.28845e-12	AEAAAAPAVAPGPAQPGHVS(0.394)PT(0.394)PAT(0.394)T(0.394)S(0.394)PGEKGEAGT(0.028)PVAAGT(0.001)TAAAIPR	_AEAAAAPAVAPGPAQPGHVS(ph)PT(ph)PATTSPGEKGEAGTPVAAGTTAAAIPR_	4	1147.55	269
Q7TSH2	Phosphorylase b kinase regulatory subunit beta	Phkb	0.378628		S	0.00756697	QS(0.379)S(0.311)T(0.311)ADAPEAQHEPGITITEWK	_QS(ph)STADAPEAQHEPGITITEWK_	3	826.039	692
Q8CHG7	Rap guanine nucleotide exchange factor 2	Rapgef2	0.37573		S	0.00301102	QAEDTIS(0.002)NAS(0.006)S(0.149)QLS(0.376)S(0.376)PPT(0.06)S(0.025)PQS(0.004)S(0.002)PR	_QAEDTISNASSQLS(ph)SPPTSPQSSPR_	3	884.731	1115
P63318	Protein kinase C gamma type	Prkcg	0.373804		S	0.0184914	MGPS(0.298)S(0.321)S(0.374)PIPS(0.008)PS(0.057)PS(0.778)PT(0.155)DS(0.009)KR	_MGPSSS(ph)PIPSPSPS(ph)PTDSKR_	3	724.641	322
Q3V3V9	Leucine-rich repeat-containing protein 16C	Rltpr	0.373649		Y	0.00155461	LEAPPSPS(0.002)LGS(0.002)GLGS(0.002)KPLPPY(0.374)PT(0.274)EPS(0.313)S(0.322)PERS(0.658)PPS(0.043)PAT(0.01)DQR	_LEAPPSPSLGSGLGSKPLPPY(ph)PTEPSSPERS(ph)PPSPATDQR_	4	1061	1271
F6XIT3		Adam22	0.367091		S	1.9665e-07	S(0.367)NS(0.315)T(0.315)EREPQAPEPGHS(0.002)LAQT(0.001)IPSQGISPGGSDSPQTGSLDHR	_S(ph)NSTEREPQAPEPGHSLAQTIPSQGISPGGSDSPQTGSLDHR_	4	1098.25	139
P31648	Sodium- and chloride-dependent GABA transporter 1	Slc6a1	0.365895		S	0.000375162	LQVMIQPS(0.023)EDIVRPENGPEQPQAGS(0.306)S(0.306)AS(0.366)K	_LQVMIQPSEDIVRPENGPEQPQAGSSAS(ph)K_	3	1058.17	594
Q9ERU9	E3 SUMO-protein ligase RanBP2	Ranbp2	0.364202		S	0.00149695	EDALDDSVS(0.003)S(0.003)S(0.003)S(0.003)VHAS(0.364)PLAS(0.361)S(0.264)PVRK	_EDALDDSVSSSSVHAS(ph)PLASSPVRK_	3	874.408	2083
O88737	Protein bassoon	Bsn	0.363962		S	3.65189e-12	GEHSSTLPASTPSYTSGTS(0.001)PT(0.003)S(0.018)LS(0.014)S(0.014)LEEDS(0.064)DS(0.29)S(0.231)PS(0.364)RR	_GEHSSTLPASTPSYTSGTSPTSLSSLEEDSDSSPS(ph)RR_	3	1293.23	1021
D3YZU1	SH3 and multiple ankyrin repeat domains protein 1	Shank1	0.36367		S	0.0205521	GS(0.364)S(0.318)T(0.318)EDGPGVPPPSPR	_GS(ph)STEDGPGVPPPSPR_	2	808.851	1516
Q99NH0	Ankyrin repeat domain-containing protein 17	Ankrd17	0.358115		S	0.00629016	EHYPVS(0.358)S(0.358)PS(0.452)S(0.452)PS(0.378)PPAQPGGVS(0.003)R	_EHYPVS(ph)SPS(ph)SPSPPAQPGGVSR_	3	794.005	2037
Q99NH0	Ankyrin repeat domain-containing protein 17	Ankrd17	0.358115		S	0.00629016	EHYPVS(0.358)S(0.358)PS(0.452)S(0.452)PS(0.378)PPAQPGGVS(0.003)R	_EHYPVS(ph)SPS(ph)SPSPPAQPGGVSR_	3	794.005	2038
O88703	Potassium/sodium hyperpolarization-activated cyclic nucleotide-gated channel 2	Hcn2	0.354368		S	0.0150536	AS(0.354)RPLS(0.335)AS(0.3)QPS(0.01)LPHGVPAPS(0.244)PAAS(0.195)ARPAS(0.148)S(0.14)S(0.133)T(0.14)PR	_AS(ph)RPLSASQPSLPHGVPAPS(ph)PAASARPASSSTPR_	4	863.917	789
E9Q4K0	Actin-binding LIM protein 2	Ablim2	0.353205		S	0.0464083	T(0.318)S(0.318)S(0.353)ES(0.01)IVS(0.001)VPASSTSGSPSR	_TSS(ph)ESIVSVPASSTSGSPSR_	2	1001.95	299
Q9Z2E9	Seipin	Bscl2	0.351582		S	9.94638e-08	HQPGQESTQQSDVTEDGES(0.001)PEDPS(0.352)GT(0.352)EGQLS(0.296)EEEKPEK	_HQPGQESTQQSDVTEDGESPEDPS(ph)GTEGQLSEEEKPEK_	4	1052.19	314
Q9Z2E9	Seipin	Bscl2	0.351582		T	9.94638e-08	HQPGQESTQQSDVTEDGES(0.001)PEDPS(0.352)GT(0.352)EGQLS(0.296)EEEKPEK	_HQPGQESTQQSDVTEDGESPEDPS(ph)GTEGQLSEEEKPEK_	4	1052.19	316
E9QP54	Jouberin	Ahi1	0.343196		S	0.00545026	AVSNDNEDT(0.022)NGDGVHEIT(0.343)S(0.343)RDS(0.292)PVHPK	_AVSNDNEDTNGDGVHEIT(ph)SRDSPVHPK_	4	743.327	178
E9QP54	Jouberin	Ahi1	0.343196		T	0.00545026	AVSNDNEDT(0.022)NGDGVHEIT(0.343)S(0.343)RDS(0.292)PVHPK	_AVSNDNEDTNGDGVHEIT(ph)SRDSPVHPK_	4	743.327	177
P54726	UV excision repair protein RAD23 homolog A	Rad23a	0.33885		T	0.00106367	EDKS(0.899)PS(0.076)EES(0.164)T(0.151)T(0.138)T(0.339)T(0.117)S(0.108)PES(0.007)IS(0.001)GSVPSSGSSGR	_EDKS(ph)PSEESTTT(ph)TSPESISGSVPSSGSSGR_	3	1044.09	131
A0A087WQ39		Iqsec1	0.336159		S	0.0095395	S(0.281)S(0.281)AGS(0.336)LES(0.101)NVEGSIISSPHMR	_SSAGS(ph)LESNVEGSIISSPHMR_	3	742.335	941
Q9WV69	Dematin	Epb49	0.334155	3	S	0.0103086	S(0.334)T(0.334)S(0.289)PPPS(0.043)PEVWAESR	_S(ph)TSPPPSPEVWAESR_	3	569.586	90
P97445	Voltage-dependent P/Q-type calcium channel subunit alpha-1A	Cacna1a	0.333333		S	4.55773e-06	T(0.333)GT(0.333)WS(0.333)PERGPPIDMPNSQPNSQSVEMR	_T(ph)GTWSPERGPPIDMPNSQPNSQSVEMR_	3	1026.79	1998
P28028	Serine/threonine-protein kinase B-raf	Braf	0.333333		S	1.19279e-20	S(0.333)S(0.333)S(0.333)APNVHINTIEPVNIDEKFPEVELQDQR	_S(ph)SSAPNVHINTIEPVNIDEKFPEVELQDQR_	3	1162.56	346
P28028	Serine/threonine-protein kinase B-raf	Braf	0.333333		S	1.19279e-20	S(0.333)S(0.333)S(0.333)APNVHINTIEPVNIDEKFPEVELQDQR	_S(ph)SSAPNVHINTIEPVNIDEKFPEVELQDQR_	3	1162.56	347
P97855	Ras GTPase-activating protein-binding protein 1	G3bp1	0.333333		S	5.23884e-07	S(0.333)T(0.333)S(0.333)PAPADVAPAQEDLR	_S(ph)TSPAPADVAPAQEDLR_	2	902.909	229
Q8BJI1	Sodium-dependent neutral amino acid transporter SLC6A17	Slc6a17	0.333333		S	3.91217e-05	EHS(0.333)NEHVT(0.333)ES(0.333)VADLLALEEPVDYK	_EHS(ph)NEHVTESVADLLALEEPVDYK_	4	701.822	20
P97445	Voltage-dependent P/Q-type calcium channel subunit alpha-1A	Cacna1a	0.333333		T	4.55773e-06	T(0.333)GT(0.333)WS(0.333)PERGPPIDMPNSQPNSQSVEMR	_T(ph)GTWSPERGPPIDMPNSQPNSQSVEMR_	3	1026.79	1994
P97445	Voltage-dependent P/Q-type calcium channel subunit alpha-1A	Cacna1a	0.333333		T	4.55773e-06	T(0.333)GT(0.333)WS(0.333)PERGPPIDMPNSQPNSQSVEMR	_T(ph)GTWSPERGPPIDMPNSQPNSQSVEMR_	3	1026.79	1996
P97855	Ras GTPase-activating protein-binding protein 1	G3bp1	0.333333		T	5.23884e-07	S(0.333)T(0.333)S(0.333)PAPADVAPAQEDLR	_S(ph)TSPAPADVAPAQEDLR_	2	902.909	230
Q8BJI1	Sodium-dependent neutral amino acid transporter SLC6A17	Slc6a17	0.333333		T	3.91217e-05	EHS(0.333)NEHVT(0.333)ES(0.333)VADLLALEEPVDYK	_EHS(ph)NEHVTESVADLLALEEPVDYK_	4	701.822	18
J3KMT7	Transducin-like enhancer protein 3	Tle3	0.333319		S	0.0052406	Y(0.333)DS(0.333)DGDKS(0.333)DDLVVDVSNEDPATPR	_Y(ph)DSDGDKSDDLVVDVSNEDPATPR_	3	897.043	251
J3KMT7	Transducin-like enhancer protein 3	Tle3	0.333319		S	0.0052406	Y(0.333)DS(0.333)DGDKS(0.333)DDLVVDVSNEDPATPR	_Y(ph)DSDGDKSDDLVVDVSNEDPATPR_	3	897.043	256
J3KMT7	Transducin-like enhancer protein 3	Tle3	0.333319		Y	0.0052406	Y(0.333)DS(0.333)DGDKS(0.333)DDLVVDVSNEDPATPR	_Y(ph)DSDGDKSDDLVVDVSNEDPATPR_	3	897.043	249
Q9ESJ4	NCK-interacting protein with SH3 domain	Nckipsd	0.332854		S	4.23739e-06	RGTSASSATVMTPS(0.333)T(0.333)S(0.333)DHHLDAAVS(0.001)R	_RGTSASSATVMTPS(ph)TSDHHLDAAVSR_	4	681.312	120
Q9ESJ4	NCK-interacting protein with SH3 domain	Nckipsd	0.332854		T	4.23739e-06	RGTSASSATVMTPS(0.333)T(0.333)S(0.333)DHHLDAAVS(0.001)R	_RGTSASSATVMTPS(ph)TSDHHLDAAVSR_	4	681.312	121
Q8BYI9	Tenascin-R	Tnr	0.332008		T	0.0286118	IT(0.038)FT(0.332)PS(0.289)S(0.289)GIS(0.045)S(0.007)EVTVPR	_ITFT(ph)PSSGISSEVTVPR_	3	619.971	721
Q5DTM8	E3 ubiquitin-protein ligase BRE1A	Rnf20	0.329405		S	1.96967e-25	SGSALLQS(0.012)QS(0.329)S(0.329)T(0.329)EDPKDEPTELKQDSEDLATHSSALK	_SGSALLQSQS(ph)STEDPKDEPTELKQDSEDLATHSSALK_	4	1003.22	524
Q5DTM8	E3 ubiquitin-protein ligase BRE1A	Rnf20	0.329405		S	1.96967e-25	SGSALLQS(0.012)QS(0.329)S(0.329)T(0.329)EDPKDEPTELKQDSEDLATHSSALK	_SGSALLQSQS(ph)STEDPKDEPTELKQDSEDLATHSSALK_	4	1003.22	525
Q5DTM8	E3 ubiquitin-protein ligase BRE1A	Rnf20	0.329405		T	1.96967e-25	SGSALLQS(0.012)QS(0.329)S(0.329)T(0.329)EDPKDEPTELKQDSEDLATHSSALK	_SGSALLQSQS(ph)STEDPKDEPTELKQDSEDLATHSSALK_	4	1003.22	526
Q9EPN1	Neurobeachin	Nbea	0.326245		T	0.00567581	AVPNVDAGS(0.001)IIS(0.326)DT(0.326)ERS(0.326)DDGKES(0.02)GK	_AVPNVDAGSIIS(ph)DTERSDDGKESGK_	4	657.551	1254
F8VPQ4	SLIT-ROBO Rho GTPase-activating protein 3	Srgap3	0.324703		S	0.0121895	S(0.325)S(0.325)S(0.325)S(0.02)S(0.003)S(0.003)S(0.001)GVGSPAVTPTEK	_S(ph)SSSSSSGVGSPAVTPTEK_	2	916.401	1068
F8VPQ4	SLIT-ROBO Rho GTPase-activating protein 3	Srgap3	0.324703		S	0.0121895	S(0.325)S(0.325)S(0.325)S(0.02)S(0.003)S(0.003)S(0.001)GVGSPAVTPTEK	_S(ph)SSSSSSGVGSPAVTPTEK_	2	916.401	1069
F8VPQ4	SLIT-ROBO Rho GTPase-activating protein 3	Srgap3	0.324703		S	0.0121895	S(0.325)S(0.325)S(0.325)S(0.02)S(0.003)S(0.003)S(0.001)GVGSPAVTPTEK	_S(ph)SSSSSSGVGSPAVTPTEK_	2	916.401	1070
Q8C0D5	Elongation factor Tu GTP-binding domain-containing protein 1	Eftud1	0.322037		S	0.038279	LAAAQGQT(0.016)S(0.016)QGPT(0.322)QDGGALET(0.322)S(0.322)PHEDEPRGDEPDVAS(0.001)VS(0.001)R	_LAAAQGQTSQGPT(ph)QDGGALETSPHEDEPRGDEPDVASVSR_	4	1035.96	474
Q8C0D5	Elongation factor Tu GTP-binding domain-containing protein 1	Eftud1	0.322037		T	0.038279	LAAAQGQT(0.016)S(0.016)QGPT(0.322)QDGGALET(0.322)S(0.322)PHEDEPRGDEPDVAS(0.001)VS(0.001)R	_LAAAQGQTSQGPT(ph)QDGGALETSPHEDEPRGDEPDVASVSR_	4	1035.96	465
Q8C0D5	Elongation factor Tu GTP-binding domain-containing protein 1	Eftud1	0.322037		T	0.038279	LAAAQGQT(0.016)S(0.016)QGPT(0.322)QDGGALET(0.322)S(0.322)PHEDEPRGDEPDVAS(0.001)VS(0.001)R	_LAAAQGQTSQGPT(ph)QDGGALETSPHEDEPRGDEPDVASVSR_	4	1035.96	473
E9Q0J2	Ral GTPase-activating protein subunit beta	Ralgapb	0.321849		S	0.00502829	VQHQAS(0.071)S(0.322)T(0.294)S(0.321)PLS(0.562)S(0.42)PNQT(0.008)S(0.002)S(0.001)EPR	_VQHQASS(ph)TSPLS(ph)SPNQTSSEPR_	3	829.018	415
E9Q0J2	Ral GTPase-activating protein subunit beta	Ralgapb	0.321463		S	0.00502829	VQHQAS(0.071)S(0.322)T(0.294)S(0.321)PLS(0.562)S(0.42)PNQT(0.008)S(0.002)S(0.001)EPR	_VQHQASS(ph)TSPLS(ph)SPNQTSSEPR_	3	829.018	417
E9Q1T1	Calcium/calmodulin-dependent protein kinase type II subunit delta	Camk2d	0.319755		S	0.00219595	ENIPT(0.002)PALEPQT(0.022)T(0.022)VIHNPDGNKES(0.32)T(0.32)ES(0.092)S(0.092)NT(0.104)T(0.027)IEDEDVK	_ENIPTPALEPQTTVIHNPDGNKES(ph)TESSNTTIEDEDVK_	4	1058.24	364
E9Q1T1	Calcium/calmodulin-dependent protein kinase type II subunit delta	Camk2d	0.319755		T	0.00219595	ENIPT(0.002)PALEPQT(0.022)T(0.022)VIHNPDGNKES(0.32)T(0.32)ES(0.092)S(0.092)NT(0.104)T(0.027)IEDEDVK	_ENIPTPALEPQTTVIHNPDGNKES(ph)TESSNTTIEDEDVK_	4	1058.24	365
A2AFQ0	E3 ubiquitin-protein ligase HUWE1	Huwe1	0.31403		S	3.14991e-07	REESPMDVDQPS(0.314)PS(0.314)AQDT(0.314)QS(0.058)IVISDGTPQGEK	_REESPMDVDQPS(ph)PSAQDTQSIVISDGTPQGEK_	3	1170.19	3819
A2AFQ0	E3 ubiquitin-protein ligase HUWE1	Huwe1	0.31403		S	3.14991e-07	REESPMDVDQPS(0.314)PS(0.314)AQDT(0.314)QS(0.058)IVISDGTPQGEK	_REESPMDVDQPS(ph)PSAQDTQSIVISDGTPQGEK_	3	1170.19	3821
A2AFQ0	E3 ubiquitin-protein ligase HUWE1	Huwe1	0.31403		T	3.14991e-07	REESPMDVDQPS(0.314)PS(0.314)AQDT(0.314)QS(0.058)IVISDGTPQGEK	_REESPMDVDQPS(ph)PSAQDTQSIVISDGTPQGEK_	3	1170.19	3825
Q9QXS6	Drebrin	Dbn1	0.301284		S	0.00542104	MAPTPIPT(0.301)RS(0.301)PS(0.301)DS(0.027)S(0.032)T(0.032)AS(0.003)T(0.001)PIAEQIER	_MAPTPIPT(ph)RSPSDSSTASTPIAEQIER_	3	974.13	385
Q9QXS6	Drebrin	Dbn1	0.301284		S	0.00542104	MAPTPIPT(0.301)RS(0.301)PS(0.301)DS(0.027)S(0.032)T(0.032)AS(0.003)T(0.001)PIAEQIER	_MAPTPIPT(ph)RSPSDSSTASTPIAEQIER_	3	974.13	387
Q9QXS6	Drebrin	Dbn1	0.301284		T	0.00542104	MAPTPIPT(0.301)RS(0.301)PS(0.301)DS(0.027)S(0.032)T(0.032)AS(0.003)T(0.001)PIAEQIER	_MAPTPIPT(ph)RSPSDSSTASTPIAEQIER_	3	974.13	383
Q8BTI8	Serine/arginine repetitive matrix protein 2	Srrm2	0.299589		S	0.0244002	RS(0.227)S(0.3)S(0.3)ELS(0.174)PEVVEK	_RSS(ph)SELSPEVVEK_	2	763.859	1340
A2ARP8	Microtubule-associated protein 1A	Mtap1a	0.299045		S	4.35002e-07	HSPGEITGPGGHFMT(0.001)S(0.001)DS(0.002)S(0.01)LT(0.299)KS(0.299)PES(0.299)LS(0.073)S(0.016)PAMEDLAMEWGGK	_HSPGEITGPGGHFMTSDSSLT(ph)KSPESLSSPAMEDLAMEWGGK_	4	1107.24	1548
A2ARP8	Microtubule-associated protein 1A	Mtap1a	0.299045		S	4.35002e-07	HSPGEITGPGGHFMT(0.001)S(0.001)DS(0.002)S(0.01)LT(0.299)KS(0.299)PES(0.299)LS(0.073)S(0.016)PAMEDLAMEWGGK	_HSPGEITGPGGHFMTSDSSLT(ph)KSPESLSSPAMEDLAMEWGGK_	4	1107.24	1551
A2ARP8	Microtubule-associated protein 1A	Mtap1a	0.299045		T	4.35002e-07	HSPGEITGPGGHFMT(0.001)S(0.001)DS(0.002)S(0.01)LT(0.299)KS(0.299)PES(0.299)LS(0.073)S(0.016)PAMEDLAMEWGGK	_HSPGEITGPGGHFMTSDSSLT(ph)KSPESLSSPAMEDLAMEWGGK_	4	1107.24	1546
P14873	Microtubule-associated protein 1B	Map1b	0.295041		S	0.0289343	T(0.005)LEVVS(0.562)PS(0.291)QS(0.292)VT(0.293)GS(0.295)AGHT(0.182)PY(0.159)Y(0.14)QS(0.664)PT(0.118)DEK	_TLEVVS(ph)PS(ph)QSVTGSAGHTPYYQS(ph)PTDEK_	3	1069.11	1325
P14873	Microtubule-associated protein 1B	Map1b	0.293396		T	0.0289343	T(0.005)LEVVS(0.562)PS(0.291)QS(0.292)VT(0.293)GS(0.295)AGHT(0.182)PY(0.159)Y(0.14)QS(0.664)PT(0.118)DEK	_TLEVVS(ph)PS(ph)QSVTGSAGHTPYYQS(ph)PTDEK_	3	1069.11	1323
P14873	Microtubule-associated protein 1B	Map1b	0.29192		S	0.0289343	T(0.005)LEVVS(0.562)PS(0.291)QS(0.292)VT(0.293)GS(0.295)AGHT(0.182)PY(0.159)Y(0.14)QS(0.664)PT(0.118)DEK	_TLEVVS(ph)PS(ph)QSVTGSAGHTPYYQS(ph)PTDEK_	3	1069.11	1321
A2ARP8	Microtubule-associated protein 1A	Mtap1a	0.291662		S	0.0314134	MAS(0.894)PPPS(0.23)GPPS(0.292)AAHT(0.252)PFHQS(0.251)PVEEKS(0.081)EPQDFQEDS(0.001)WGDTK	_MAS(ph)PPPSGPPS(ph)AAHTPFHQSPVEEKSEPQDFQEDSWGDTK_	4	1123.97	1237
P14873	Microtubule-associated protein 1B	Map1b	0.291252		S	0.0289343	T(0.005)LEVVS(0.562)PS(0.291)QS(0.292)VT(0.293)GS(0.295)AGHT(0.182)PY(0.159)Y(0.14)QS(0.664)PT(0.118)DEK	_TLEVVS(ph)PS(ph)QSVTGSAGHTPYYQS(ph)PTDEK_	3	1069.11	1319
Q9Z1B3	1-phosphatidylinositol 4,5-bisphosphate phosphodiesterase beta-1	Plcb1	0.287353		S	0.00077739	KS(0.287)EPS(0.195)S(0.195)PDHGS(0.162)S(0.162)AIEQDLAALDAEMTQK	_KS(ph)EPSSPDHGSSAIEQDLAALDAEMTQK_	4	756.339	978
P14873	Microtubule-associated protein 1B	Map1b	0.284561		S	1.48244e-31	AETEEAEEPEEDGEDNAS(0.07)GS(0.285)AS(0.285)KHS(0.285)PT(0.07)EDDES(0.007)AK	_AETEEAEEPEEDGEDNASGS(ph)ASKHSPTEDDESAK_	4	915.105	962
P14873	Microtubule-associated protein 1B	Map1b	0.284561		S	1.48244e-31	AETEEAEEPEEDGEDNAS(0.07)GS(0.285)AS(0.285)KHS(0.285)PT(0.07)EDDES(0.007)AK	_AETEEAEEPEEDGEDNASGS(ph)ASKHSPTEDDESAK_	4	915.105	964
P14873	Microtubule-associated protein 1B	Map1b	0.284561		S	3.93925e-07	AETEEAEEPEEDGEDNAS(0.07)GS(0.285)AS(0.285)KHS(0.285)PT(0.07)EDDES(0.007)AK	_AETEEAEEPEEDGEDNASGS(ph)ASKHSPTEDDESAK_	4	915.105	967
Q61644	Protein kinase C and casein kinase substrate in neurons protein 1	Pacsin1	0.276828		S	8.96207e-18	KAEGATLSNAT(0.001)GAVES(0.277)T(0.277)S(0.277)QAGDRGS(0.163)VS(0.004)S(0.001)YDR	_KAEGATLSNATGAVES(ph)TSQAGDRGSVSSYDR_	3	1051.48	334
Q61644	Protein kinase C and casein kinase substrate in neurons protein 1	Pacsin1	0.276828		S	8.96207e-18	KAEGATLSNAT(0.001)GAVES(0.277)T(0.277)S(0.277)QAGDRGS(0.163)VS(0.004)S(0.001)YDR	_KAEGATLSNATGAVES(ph)TSQAGDRGSVSSYDR_	3	1051.48	336
Q61644	Protein kinase C and casein kinase substrate in neurons protein 1	Pacsin1	0.276828		T	8.96207e-18	KAEGATLSNAT(0.001)GAVES(0.277)T(0.277)S(0.277)QAGDRGS(0.163)VS(0.004)S(0.001)YDR	_KAEGATLSNATGAVES(ph)TSQAGDRGSVSSYDR_	3	1051.48	335
Q9Z1B3	1-phosphatidylinositol 4,5-bisphosphate phosphodiesterase beta-1	Plcb1	0.271926		S	4.25716e-10	KKS(0.179)EPS(0.139)S(0.139)PDHGS(0.272)S(0.272)AIEQDLAALDAEMTQK	_KKSEPSSPDHGS(ph)SAIEQDLAALDAEMTQK_	4	788.363	987
Q9Z1B3	1-phosphatidylinositol 4,5-bisphosphate phosphodiesterase beta-1	Plcb1	0.271926		S	4.25716e-10	KKS(0.179)EPS(0.139)S(0.139)PDHGS(0.272)S(0.272)AIEQDLAALDAEMTQK	_KKSEPSSPDHGS(ph)SAIEQDLAALDAEMTQK_	4	788.363	988
Q0VF59	Disks large-associated protein 2	Dlgap2	0.27142		T	0.00503085	T(0.018)T(0.018)S(0.016)KPLIS(0.065)VT(0.271)AQS(0.188)S(0.188)T(0.188)ES(0.046)T(0.002)QDAYQDSR	_TTSKPLISVT(ph)AQSSTESTQDAYQDSR_	3	961.108	634
P14873	Microtubule-associated protein 1B	Map1b	0.263384		S	1.48244e-31	AETEEAEEPEEDGEDNAS(0.263)GS(0.263)AS(0.263)KHS(0.185)PT(0.025)EDDESAK	_AETEEAEEPEEDGEDNAS(ph)GSASKHSPTEDDESAK_	3	1219.8	960
O35954	Membrane-associated phosphatidylinositol transfer protein 1	Pitpnm1	0.256433		T	4.24635e-07	S(0.031)S(0.034)T(0.034)EARPGT(0.256)S(0.234)T(0.214)AGT(0.196)PDGPEAPPGPDAS(0.981)PDAS(0.019)FGK	_SSTEARPGT(ph)STAGTPDGPEAPPGPDAS(ph)PDASFGK_	3	1124.8	282
Q9QZS3	Protein numb homolog	Numb	0.24949		S	0.0256747	T(0.001)VVGPS(0.003)VAPGNT(0.094)APS(0.249)PS(0.249)S(0.249)PT(0.094)S(0.037)PT(0.013)PDGT(0.006)AS(0.002)S(0.002)EMNNPHAIPR	_TVVGPSVAPGNTAPS(ph)PSSPTSPTPDGTASSEMNNPHAIPR_	4	991.461	238
O88737	Protein bassoon	Bsn	0.247767		S	0.00142012	SRGEHS(0.001)STLPAS(0.009)T(0.028)PS(0.076)Y(0.023)T(0.021)S(0.021)GT(0.021)S(0.021)PT(0.076)S(0.076)LS(0.248)S(0.248)LEEDS(0.049)DS(0.012)S(0.061)PS(0.008)RR	_SRGEHSSTLPASTPSYTSGTSPTSLS(ph)SLEEDSDSSPSRR_	3	1374.28	1010
O88737	Protein bassoon	Bsn	0.247767		S	0.00142012	SRGEHS(0.001)STLPAS(0.009)T(0.028)PS(0.076)Y(0.023)T(0.021)S(0.021)GT(0.021)S(0.021)PT(0.076)S(0.076)LS(0.248)S(0.248)LEEDS(0.049)DS(0.012)S(0.061)PS(0.008)RR	_SRGEHSSTLPASTPSYTSGTSPTSLS(ph)SLEEDSDSSPSRR_	3	1374.28	1011
O88703	Potassium/sodium hyperpolarization-activated cyclic nucleotide-gated channel 2	Hcn2	0.244177		S	0.0150536	AS(0.354)RPLS(0.335)AS(0.3)QPS(0.01)LPHGVPAPS(0.244)PAAS(0.195)ARPAS(0.148)S(0.14)S(0.133)T(0.14)PR	_AS(ph)RPLSASQPSLPHGVPAPS(ph)PAASARPASSSTPR_	4	863.917	807
E9PUL5	Proline-rich transmembrane protein 2	Prrt2	0.24298		T	0.00339687	AELAPET(0.073)T(0.243)ET(0.22)PVET(0.22)PET(0.22)VQAT(0.025)DLSLNPEEGSK	_AELAPETT(ph)ETPVETPETVQATDLSLNPEEGSK_	4	866.653	72
A2AN08	E3 ubiquitin-protein ligase UBR4	Ubr4	0.237366		S	0.00264036	T(0.237)S(0.237)PADHGGS(0.237)VGS(0.237)ES(0.048)GGS(0.003)AVDSVAGEHSVSGR	_T(ph)SPADHGGSVGSESGGSAVDSVAGEHSVSGR_	4	730.814	2889
A2AN08	E3 ubiquitin-protein ligase UBR4	Ubr4	0.237366		S	0.00264036	T(0.237)S(0.237)PADHGGS(0.237)VGS(0.237)ES(0.048)GGS(0.003)AVDSVAGEHSVSGR	_T(ph)SPADHGGSVGSESGGSAVDSVAGEHSVSGR_	4	730.814	2892
Q9Z1B3	1-phosphatidylinositol 4,5-bisphosphate phosphodiesterase beta-1	Plcb1	0.236658		S	0.00327385	S(0.053)EPS(0.237)S(0.237)PDHGS(0.237)S(0.237)AIEQDLAALDAEMTQK	_SEPS(ph)SPDHGSSAIEQDLAALDAEM(ox)TQK_	3	970.75	981
Q5SXY1	Cytospin-B	Specc1	0.225505		S	0.0283801	S(0.226)S(0.226)KGS(0.226)PT(0.1)GS(0.1)S(0.122)PNNASELSLASLTEK	_S(ph)SKGSPTGSSPNNASELSLASLTEK_	3	843.729	351
Q5SXY1	Cytospin-B	Specc1	0.225505		S	0.0283801	S(0.226)S(0.226)KGS(0.226)PT(0.1)GS(0.1)S(0.122)PNNASELSLASLTEK	_S(ph)SKGSPTGSSPNNASELSLASLTEK_	3	843.729	352
Q5SXY1	Cytospin-B	Specc1	0.225505		S	0.0283801	S(0.226)S(0.226)KGS(0.226)PT(0.1)GS(0.1)S(0.122)PNNASELSLASLTEK	_S(ph)SKGSPTGSSPNNASELSLASLTEK_	3	843.729	355
Q6A065	Centrosomal protein of 170 kDa	Cep170	0.223837		S	3.12268e-07	NQAT(0.019)S(0.064)AS(0.224)S(0.173)EKDNDDDQS(0.134)DKGT(0.134)Y(0.118)T(0.134)IELENPNSEEVEAR	_NQATSAS(ph)SEKDNDDDQSDKGTYTIELENPNSEEVEAR_	4	1042.44	484

## Sheet: sheet2-commercial TiO2
Phosphopeptide identifications in mouse brain.Protein and phosphorylation site identification was performed by MaxQuant with integrated Andromeda search engine (v. 1.3.0.5). Tandem mass spectra were searched against Uniprot mouse reference proteome database (44455 sequences) concatenated with reverse decoy database and protein sequences of common contaminants. Trypsin/P was specified as cleavage …
Protein	Protein name	Gene name	Localization prob	Number of Phospho (STY)	Amino acid	PEP	Phospho (STY) Probabilities	Modified sequence	Charge	m/z	Position
Q6AXD2	Abl interactor 2	Abi2	0.968267	1	S	0.000261947	TTPPT(0.002)QKPPS(0.968)PPMS(0.03)GK	_TTPPTQKPPS(ph)PPM(ox)SGK_	2	873.91	183
A0A087WNU5			1	1	S	0.00023658	LNDELQS(1)PEK	_LNDELQS(ph)PEK_	2	626.776	1316
Q3UHD1	Brain-specific angiogenesis inhibitor 1	Bai1	0.491499		S	0.00148453	NENVAT(0.001)LS(0.016)VS(0.491)S(0.491)LER	_NENVATLSVS(ph)SLER_	2	799.875	1466
Q3UHD1	Brain-specific angiogenesis inhibitor 1	Bai1	0.491499		S	0.00148453	NENVAT(0.001)LS(0.016)VS(0.491)S(0.491)LER	_NENVATLSVS(ph)SLER_	2	799.875	1467
A0A087WPX3	Neurofascin	Nfasc	0.589256	2;3;4	S	0.00768305	DVPLGPEDPKEEDGS(0.589)FDY(0.569)S(0.589)DEDNKPLQGS(0.406)QT(0.406)S(0.406)LDGT(0.033)IK	_DVPLGPEDPKEEDGS(ph)FDYS(ph)DEDNKPLQGS(ph)QTSLDGTIK_	3	1454.93	1267
A0A087WPX3	Neurofascin	Nfasc	0.589256	2;3;4	S	0.00768305	DVPLGPEDPKEEDGS(0.589)FDY(0.569)S(0.589)DEDNKPLQGS(0.406)QT(0.406)S(0.406)LDGT(0.033)IK	_DVPLGPEDPKEEDGS(ph)FDYS(ph)DEDNKPLQGS(ph)QTSLDGTIK_	3	1454.93	1271
A0A087WPX3	Neurofascin	Nfasc	0.406499	4	S	0.00768305	DVPLGPEDPKEEDGS(0.589)FDY(0.569)S(0.589)DEDNKPLQGS(0.406)QT(0.406)S(0.406)LDGT(0.033)IK	_DVPLGPEDPKEEDGS(ph)FDYS(ph)DEDNKPLQGS(ph)QTSLDGTIK_	3	1454.93	1281
A0A087WPX3	Neurofascin	Nfasc	0.406499	4	S	0.00768305	DVPLGPEDPKEEDGS(0.589)FDY(0.569)S(0.589)DEDNKPLQGS(0.406)QT(0.406)S(0.406)LDGT(0.033)IK	_DVPLGPEDPKEEDGS(ph)FDYS(ph)DEDNKPLQGS(ph)QTSLDGTIK_	3	1454.93	1284
A0A087WQ39	IQ motif and SEC7 domain-containing protein 1	Iqsec1	1	1	S	0.021237	MQFS(1)FEGPEK	_M(ox)QFS(ph)FEGPEK_	2	648.254	179
A0A087WQ39	IQ motif and SEC7 domain-containing protein 1	Iqsec1	0.521205	1	S	0.00849116	NS(0.474)WDS(0.521)PAFS(0.005)NDVIR	_NSWDS(ph)PAFSNDVIR_	2	844.359	513
A0A087WSJ2	Calcium-activated potassium channel subunit alpha-1	Kcnma1	1	1;2	S	9.87238e-07	RLEDEQPPT(1)LS(1)PK	_RLEDEQPPT(ph)LS(ph)PK_	2	835.365	711
A0A087WSJ2	Calcium-activated potassium channel subunit alpha-1	Kcnma1	0.538477	2	S	0.00290959	S(0.462)S(0.538)PDNS(0.999)PVHGMLR	_SS(ph)PDNS(ph)PVHGM(ox)LR_	2	786.799	924
A0A087WSJ2	Calcium-activated potassium channel subunit alpha-1	Kcnma1	0.999368	2	S	0.00290959	S(0.462)S(0.538)PDNS(0.999)PVHGMLR	_SS(ph)PDNS(ph)PVHGM(ox)LR_	2	786.799	928
Q8K019	Bcl-2-associated transcription factor 1	Bclaf1	1	1	S	1.29257e-20	KAEGEPQEES(1)PLK	_KAEGEPQEES(ph)PLK_	2	761.345	177
Q8K019	Bcl-2-associated transcription factor 1	Bclaf1	1	1	S	7.39249e-07	EVQS(1)PEQVK	_EVQS(ph)PEQVK_	2	562.255	494
Q8K019	Bcl-2-associated transcription factor 1	Bclaf1	0.884094	1	S	0.0100266	IDIS(0.884)PS(0.116)ALR	_IDIS(ph)PSALR_	2	526.263	656
Q8K019	Bcl-2-associated transcription factor 1	Bclaf1	0.788476	2	S	0.000525948	Y(0.21)S(0.788)PS(0.056)QNS(0.945)PIHHIPS(0.001)R	_YS(ph)PSQNS(ph)PIHHIPSR_	3	627.268	284
Q8K019	Bcl-2-associated transcription factor 1	Bclaf1	0.945751	2	S	0.000525948	Y(0.562)S(0.353)PS(0.139)QNS(0.946)PIHHIPS(0.001)R	_Y(ph)SPSQNS(ph)PIHHIPSR_	2	940.398	289
A0A087WQE8	Kinesin-like protein KIF1A	Kif1a	0.995579	1	S	0.00930465	KT(0.004)PS(0.996)PVR	_KTPS(ph)PVR_	2	432.721	1649
A0A087WQE8	Kinesin-like protein KIF1A	Kif1a	0.961393	1	S	4.25974e-06	S(0.039)DS(0.961)LILDHQWELEK	_SDS(ph)LILDHQWELEK_	2	896.911	1471
A0A087WQE8	Kinesin-like protein KIF1A	Kif1a	0.883066	1	S	0.00449253	S(0.031)GT(0.086)S(0.883)QEELR	_SGTS(ph)QEELR_	2	543.727	1039
A0A087WRM5			1	3;4	S	1.96127e-06	EVEEDS(1)EDEEMS(1)EDEDDS(1)S(1)GEEEVVIPQKK	_EVEEDS(ph)EDEEMS(ph)EDEDDS(ph)S(ph)GEEEVVIPQKK_	3	1254.43	12
A0A087WRM5			1	3;4	S	1.96127e-06	EVEEDS(1)EDEEMS(1)EDEDDS(1)S(1)GEEEVVIPQKK	_EVEEDS(ph)EDEEMS(ph)EDEDDS(ph)S(ph)GEEEVVIPQKK_	3	1254.43	18
A0A087WRM5			1	3;4	S	1.96127e-06	EVEEDS(1)EDEEMS(1)EDEDDS(1)S(1)GEEEVVIPQKK	_EVEEDS(ph)EDEEMS(ph)EDEDDS(ph)S(ph)GEEEVVIPQKK_	3	1254.43	24
A0A087WRM5			1	3;4	S	1.96127e-06	EVEEDS(1)EDEEMS(1)EDEDDS(1)S(1)GEEEVVIPQKK	_EVEEDS(ph)EDEEMS(ph)EDEDDS(ph)S(ph)GEEEVVIPQKK_	3	1254.43	25
E9QM90	LisH domain and HEAT repeat-containing protein KIAA1468	2310035C23Rik	0.499884		S	1.06184e-05	AAMAPGGGGS(0.5)GS(0.5)GVNPFLS(0.5)DS(0.5)DEDDDEVAATEDR	_(ac)AAMAPGGGGS(ph)GS(ph)GVNPFLSDSDEDDDEVAATEDR_	3	1166.78	11
E9QM90	LisH domain and HEAT repeat-containing protein KIAA1468	2310035C23Rik	0.499884		S	1.06184e-05	AAMAPGGGGS(0.5)GS(0.5)GVNPFLS(0.5)DS(0.5)DEDDDEVAATEDR	_(ac)AAMAPGGGGS(ph)GS(ph)GVNPFLSDSDEDDDEVAATEDR_	3	1166.78	13
E9QM90	LisH domain and HEAT repeat-containing protein KIAA1468	2310035C23Rik	0.499884		S	1.06184e-05	AAMAPGGGGS(0.5)GS(0.5)GVNPFLS(0.5)DS(0.5)DEDDDEVAATEDR	_(ac)AAMAPGGGGS(ph)GS(ph)GVNPFLSDSDEDDDEVAATEDR_	3	1166.78	20
E9QM90	LisH domain and HEAT repeat-containing protein KIAA1468	2310035C23Rik	0.499884		S	1.06184e-05	AAMAPGGGGS(0.5)GS(0.5)GVNPFLS(0.5)DS(0.5)DEDDDEVAATEDR	_(ac)AAMAPGGGGS(ph)GS(ph)GVNPFLSDSDEDDDEVAATEDR_	3	1166.78	22
P63166	Small ubiquitin-related modifier 1	Sumo1	1	1	S	6.64593e-18	S(1)DQEAKPSTEDLGDKK	_(ac)S(ph)DQEAKPSTEDLGDKK_	2	935.409	2
Q80XU3	Nuclear ubiquitous casein and cyclin-dependent kinase substrate 1	Nucks1	1	1	S	3.47414e-28	EEDEEAES(1)PPEKK	_EEDEEAES(ph)PPEKK_	2	798.819	214
Q80XU3	Nuclear ubiquitous casein and cyclin-dependent kinase substrate 1	Nucks1	1	1	S	6.2476e-71	VVDYSQFQES(1)DDADEDYGR	_VVDYSQFQES(ph)DDADEDYGR_	2	1159.44	19
Q80XU3	Nuclear ubiquitous casein and cyclin-dependent kinase substrate 1	Nucks1	1	1;2	S	8.96061e-25	NSQEDS(1)EDS(1)EEKDVK	_NSQEDS(ph)EDS(ph)EEKDVK_	2	949.832	58
Q80XU3	Nuclear ubiquitous casein and cyclin-dependent kinase substrate 1	Nucks1	1	1;2	S	1.11105e-33	NSQEDS(1)EDS(1)EEKDVK	_NSQEDS(ph)EDS(ph)EEKDVK_	2	949.832	61
O70251	Elongation factor 1-beta	Eef1b	0.999974	1	S	1.88338e-23	DDDDIDLFGS(1)DDEEESEEAK	_DDDDIDLFGS(ph)DDEEESEEAK_	2	1176.92	106
A0A087WS83	Voltage-dependent R-type calcium channel subunit alpha-1E	Cacna1e	1	1;2	S	8.13174e-09	FGEAVVVGRPGS(1)GDGDS(0.988)DQS(0.012)R	_FGEAVVVGRPGS(ph)GDGDS(ph)DQSR_	2	1126.45	15
A0A087WS83	Voltage-dependent R-type calcium channel subunit alpha-1E	Cacna1e	0.987616	2	S	8.13174e-09	FGEAVVVGRPGS(1)GDGDS(0.988)DQS(0.012)R	_FGEAVVVGRPGS(ph)GDGDS(ph)DQSR_	2	1126.45	20
Q99NE5	Regulating synaptic membrane exocytosis protein 1	Rims1	0.999534	1;2	S	2.47187e-09	QGS(1)PT(0.002)QS(0.999)PPADTSFGSR	_QGS(ph)PTQS(ph)PPADTSFGSR_	2	940.367	1023
Q99NE5	Regulating synaptic membrane exocytosis protein 1	Rims1	0.998922	2	S	2.47187e-09	QGS(1)PT(0.002)QS(0.999)PPADTSFGSR	_QGS(ph)PTQS(ph)PPADTSFGSR_	2	940.367	1027
Q99NE5	Regulating synaptic membrane exocytosis protein 1	Rims1	0.999991	1	S	0.00634489	S(1)LDEIHPTR	_S(ph)LDEIHPTR_	2	574.261	812
Q99NE5	Regulating synaptic membrane exocytosis protein 1	Rims1	0.653747	2	S	2.74537e-07	S(0.654)S(0.654)DS(0.654)DVS(0.036)DVS(0.002)AIS(0.001)R	_S(ph)S(ph)DSDVSDVSAISR_	2	792.795	1110
Q99NE5	Regulating synaptic membrane exocytosis protein 1	Rims1	0.653749	2	S	2.74537e-07	S(0.654)S(0.654)DS(0.654)DVS(0.036)DVS(0.002)AIS(0.001)R	_S(ph)S(ph)DSDVSDVSAISR_	2	792.795	1111
Q99NE5	Regulating synaptic membrane exocytosis protein 1	Rims1	0.653756	2	S	0.0118974	S(0.654)S(0.654)DS(0.654)DVS(0.036)DVS(0.002)AIS(0.001)R	_S(ph)S(ph)DSDVSDVSAISR_	2	792.795	1113
E9QQ25	Striated muscle-specific serine/threonine-protein kinase	Speg	0.720984	1	S	0.00734678	S(0.137)S(0.137)S(0.721)FS(0.004)QGEAEPR	_SSS(ph)FSQGEAEPR_	2	681.272	2135
A0JNY3	Gephyrin	Gphn	0.606056	4	S	0.000116318	DT(0.37)AS(0.606)LS(0.658)T(0.527)T(0.831)PS(0.912)ES(0.095)PR	_DTAS(ph)LS(ph)TT(ph)PS(ph)ESPR_	2	884.779	298
A0JNY3	Gephyrin	Gphn	0.658235	4	S	0.000116318	DT(0.37)AS(0.606)LS(0.658)T(0.527)T(0.831)PS(0.912)ES(0.095)PR	_DTAS(ph)LS(ph)TT(ph)PS(ph)ESPR_	2	884.779	300
A0JNY3	Gephyrin	Gphn	0.9123	4	S	0.000116318	DT(0.37)AS(0.606)LS(0.658)T(0.527)T(0.831)PS(0.912)ES(0.095)PR	_DTAS(ph)LS(ph)TT(ph)PS(ph)ESPR_	2	884.779	304
A0JNY3	Gephyrin	Gphn	0.993508	1;2	S	2.32178e-21	DTAS(0.001)LST(0.075)T(0.848)PS(0.082)ES(0.994)PR	_DTASLSTT(ph)PSES(ph)PR_	2	804.813	306
A0JNY3	Gephyrin	Gphn	1	2;3	S	1.50425e-15	EVHDELEDLPS(1)PPPPLS(0.979)PPPT(0.393)T(0.338)S(0.29)PHK	_EVHDELEDLPS(ph)PPPPLS(ph)PPPT(ph)TSPHK_	3	1018.44	188
A0JNY3	Gephyrin	Gphn	0.97864	2;3	S	1.50425e-15	EVHDELEDLPS(1)PPPPLS(0.979)PPPT(0.393)T(0.338)S(0.29)PHK	_EVHDELEDLPS(ph)PPPPLS(ph)PPPT(ph)TSPHK_	3	1018.44	194
P84104	Serine/arginine-rich splicing factor 3	Srsf3	1	1	S	0.0373126	RRS(1)PPPR	_RRS(ph)PPPR_	2	473.243	108
A2A5H1	WAP four-disulfide core domain protein 8	Wfdc8	1	2	S	0.0203687	VPGDCFRPVS(1)T(1)R	_VPGDCFRPVS(ph)T(ph)R_	2	747.304	19
Q91V14	Solute carrier family 12 member 5	Slc12a5	0.621817	1	S	0.0228581	ES(0.377)S(0.622)PFINS(0.001)T(0.001)DTEK	_ESS(ph)PFINSTDTEK_	2	767.819	49
Q91W39	Nuclear receptor coactivator 5	Ncoa5	0.913124	1	S	0.000619122	MNTAPS(0.049)RPS(0.913)PT(0.037)R	_(ac)M(ox)NTAPSRPS(ph)PTR_	2	726.819	9
A2A5Y6	Microtubule-associated protein	Mapt	1	2;3;4	S	2.56166e-108	AKTDHGAEIVYKS(1)PVVS(1)GDT(0.291)S(0.709)PR	_AKTDHGAEIVYKS(ph)PVVS(ph)GDTS(ph)PR_	3	885.382	704
A2A5Y6	Microtubule-associated protein	Mapt	1	1;2;3;4	S	2.56166e-108	TDHGAEIVYKS(1)PVVS(1)GDT(0.234)S(0.766)PR	_TDHGAEIVYKS(ph)PVVS(ph)GDTS(ph)PR_	2	1228	708
A2A5Y6	Microtubule-associated protein	Mapt	0.984938	1;2;3;4	S	2.56166e-108	T(0.002)DHGAEIVY(0.163)KS(0.878)PVVS(0.987)GDT(0.987)S(0.985)PR	_TDHGAEIVYKS(ph)PVVS(ph)GDT(ph)S(ph)PR_	3	845.66	712
A2A5Y6	Microtubule-associated protein	Mapt	0.989184	2;3	S	1.89855e-10	IPAKT(0.164)T(0.847)PS(0.989)PK	_IPAKTT(ph)PS(ph)PK_	2	600.277	486
A2A5Y6	Microtubule-associated protein	Mapt	0.808013	3;4	S	3.93671e-10	S(0.182)GERS(0.808)GY(0.037)S(0.981)S(0.99)PGS(0.971)PGT(0.028)PGS(0.002)R	_SGERS(ph)GYS(ph)S(ph)PGS(ph)PGTPGSR_	2	1071.85	503
A2A5Y6	Microtubule-associated protein	Mapt	0.995787	3;4	S	9.48671e-18	S(0.004)GYS(0.996)S(1)PGS(1)PGTPGSR	_SGYS(ph)S(ph)PGS(ph)PGTPGSR_	2	817.27	506
A2A5Y6	Microtubule-associated protein	Mapt	0.999987	1;2;3;4	S	9.48671e-18	S(0.004)GYS(0.996)S(1)PGS(1)PGTPGSR	_SGYS(ph)S(ph)PGS(ph)PGTPGSR_	2	817.27	507
A2A5Y6	Microtubule-associated protein	Mapt	0.999921	2;3;4	S	9.48671e-18	S(0.004)GYS(0.996)S(1)PGS(1)PGTPGSR	_SGYS(ph)S(ph)PGS(ph)PGTPGSR_	2	817.27	510
A2A5Y6	Microtubule-associated protein	Mapt	0.46133		S	6.36926e-08	S(0.461)T(0.461)PT(0.077)AEDVTAPLVDER	_S(ph)TPTAEDVTAPLVDER_	2	890.904	57
A2A690	Protein TANC2	Tanc2	0.887272	1	S	0.0240942	PS(0.002)QGLPVIQS(0.887)PPS(0.055)S(0.055)PAHR	_PSQGLPVIQS(ph)PPSSPAHR_	3	645.654	1446
A2A690	Protein TANC2	Tanc2	0.991516	2	S	1.47002e-13	QIAS(0.008)DS(0.992)PHAS(1)PK	_QIASDS(ph)PHAS(ph)PK_	2	699.279	400
A2A690	Protein TANC2	Tanc2	0.999999	2	S	1.47002e-13	QIAS(0.008)DS(0.992)PHAS(1)PK	_QIASDS(ph)PHAS(ph)PK_	2	699.279	404
A2A699	Protein FAM171A2	Fam171a2	1	3	S	1.34325e-28	RDS(1)LT(1)S(1)PEDELGAEVGDEAGDKK	_RDS(ph)LT(ph)S(ph)PEDELGAEVGDEAGDKK_	3	886.68	785
A2A699	Protein FAM171A2	Fam171a2	1	3	S	1.34325e-28	RDS(1)LT(1)S(1)PEDELGAEVGDEAGDKK	_RDS(ph)LT(ph)S(ph)PEDELGAEVGDEAGDKK_	3	886.68	788
A2A837	Serine/arginine-rich splicing factor 4	Srsf4	0.730912	2	S	0.01635	S(0.269)T(0.269)S(0.731)KS(0.731)KPNVPAES(0.001)R	_STS(ph)KS(ph)KPNVPAESR_	3	549.909	450
A2A837	Serine/arginine-rich splicing factor 4	Srsf4	0.730912	2	S	0.01635	S(0.269)T(0.269)S(0.731)KS(0.731)KPNVPAES(0.001)R	_STS(ph)KS(ph)KPNVPAESR_	3	549.909	452
E9PUK6	Serine/arginine repetitive matrix protein 1	Srrm1	0.999999	3;4	S	1.82254e-13	AKS(1)PT(0.996)PS(0.222)LS(0.785)PARNS(0.997)DQEGGGK	_AKS(ph)PT(ph)PSLS(ph)PARNS(ph)DQEGGGK_	3	801.972	809
E9PUK6	Serine/arginine repetitive matrix protein 1	Srrm1	0.554497	3	S	0.0225542	AKS(0.997)PT(0.972)PS(0.554)LS(0.476)PAR	_AKS(ph)PT(ph)PS(ph)LSPAR_	2	726.29	813
E9PUK6	Serine/arginine repetitive matrix protein 1	Srrm1	0.785085	4	S	1.82254e-13	AKS(1)PT(0.996)PS(0.222)LS(0.785)PARNS(0.997)DQEGGGK	_AKS(ph)PT(ph)PSLS(ph)PARNS(ph)DQEGGGK_	3	801.972	815
E9PUK6	Serine/arginine repetitive matrix protein 1	Srrm1	0.997225	4	S	1.82254e-13	AKS(1)PT(0.996)PS(0.222)LS(0.785)PARNS(0.997)DQEGGGK	_AKS(ph)PT(ph)PSLS(ph)PARNS(ph)DQEGGGK_	3	801.972	820
E9PUK6	Serine/arginine repetitive matrix protein 1	Srrm1	0.595384	2	S	8.36288e-06	HRPS(0.595)S(0.407)PAT(0.998)PPPK	_HRPS(ph)SPAT(ph)PPPK_	2	716.313	400
E9PUK6	Serine/arginine repetitive matrix protein 1	Srrm1	0.592408	2	S	0.00449158	HRPS(0.419)S(0.592)PAT(0.989)PPPK	_HRPSS(ph)PAT(ph)PPPK_	3	477.878	401
E9PUK6		Srrm1	1	2	S	3.98753e-08	KAAS(1)PS(0.998)PQS(0.002)VR	_KAAS(ph)PS(ph)PQSVR_	2	644.278	756
E9PUK6		Srrm1	0.998305	2	S	3.98753e-08	KAAS(1)PS(0.998)PQS(0.002)VR	_KAAS(ph)PS(ph)PQSVR_	2	644.278	758
E9PUK6	Serine/arginine repetitive matrix protein 1	Srrm1	1	2	S	1.6305e-135	KET(1)ES(1)EAEDDNLDDLER	_KET(ph)ES(ph)EAEDDNLDDLER_	2	1084.4	892
E9PUK6	Serine/arginine repetitive matrix protein 1	Srrm1	0.983028	2;3	S	0.000134036	KPPAPPS(0.983)PVQS(0.481)QS(0.481)PS(0.094)T(0.09)NWS(0.87)PAVPAK	_KPPAPPS(ph)PVQS(ph)QSPSTNWS(ph)PAVPAK_	3	932.413	787
E9PUK6	Serine/arginine repetitive matrix protein 1	Srrm1	0.481356	3	S	0.000134036	KPPAPPS(0.983)PVQS(0.481)QS(0.481)PS(0.094)T(0.09)NWS(0.87)PAVPAK	_KPPAPPS(ph)PVQS(ph)QSPSTNWS(ph)PAVPAK_	3	932.413	791
E9PUK6	Serine/arginine repetitive matrix protein 1	Srrm1	0.481356	3	S	0.000134036	KPPAPPS(0.983)PVQS(0.481)QS(0.481)PS(0.094)T(0.09)NWS(0.87)PAVPAK	_KPPAPPS(ph)PVQS(ph)QSPSTNWS(ph)PAVPAK_	3	932.413	793
E9PUK6	Serine/arginine repetitive matrix protein 1	Srrm1	0.870489	3	S	0.000134036	KPPAPPS(0.983)PVQS(0.481)QS(0.481)PS(0.094)T(0.09)NWS(0.87)PAVPAK	_KPPAPPS(ph)PVQS(ph)QSPSTNWS(ph)PAVPAK_	3	932.413	799
E9PUK6	Serine/arginine repetitive matrix protein 1	Srrm1	1	2	S	0.00139489	RAS(1)PS(1)PPPKR	_RAS(ph)PS(ph)PPPKR_	2	626.784	645
E9PUK6	Serine/arginine repetitive matrix protein 1	Srrm1	1	2	S	0.00139489	RAS(1)PS(1)PPPKR	_RAS(ph)PS(ph)PPPKR_	2	626.784	647
E9PUK6	Serine/arginine repetitive matrix protein 1	Srrm1	1	2	S	0.0142242	RHS(1)PS(1)PRPR	_RHS(ph)PS(ph)PRPR_	2	625.271	702
E9PUK6	Serine/arginine repetitive matrix protein 1	Srrm1	1	2	S	0.0142242	RHS(1)PS(1)PRPR	_RHS(ph)PS(ph)PRPR_	2	625.271	704
E9PUK6	Serine/arginine repetitive matrix protein 1	Srrm1	1	2;3	S	7.28778e-08	RLS(1)PS(1)AS(1)PPR	_RLS(ph)PS(ph)AS(ph)PPR_	2	654.251	387
E9PUK6	Serine/arginine repetitive matrix protein 1	Srrm1	1	3	S	7.28778e-08	RLS(1)PS(1)AS(1)PPR	_RLS(ph)PS(ph)AS(ph)PPR_	2	654.251	389
E9PUK6	Serine/arginine repetitive matrix protein 1	Srrm1	1	2;3	S	7.28778e-08	RLS(1)PS(1)AS(1)PPR	_RLS(ph)PS(ph)AS(ph)PPR_	2	654.251	391
E9PUK6	Serine/arginine repetitive matrix protein 1	Srrm1	0.99959	2	S	0.00741743	RRS(1)PS(0.998)LS(0.002)SK	_RRS(ph)PS(ph)LSSK_	2	589.26	672
E9PUK6	Serine/arginine repetitive matrix protein 1	Srrm1	0.997716	2	S	0.00741743	RRS(1)PS(0.998)LS(0.002)SK	_RRS(ph)PS(ph)LSSK_	2	589.26	674
E9PUK6	Serine/arginine repetitive matrix protein 1	Srrm1	1	2	S	0.000100566	S(1)PS(1)PAPPPPPPPPPPR	_S(ph)PS(ph)PAPPPPPPPPPPR_	3	582.267	572
E9PUK6	Serine/arginine repetitive matrix protein 1	Srrm1	1	2	S	0.000100566	S(1)PS(1)PAPPPPPPPPPPR	_S(ph)PS(ph)PAPPPPPPPPPPR_	3	582.267	574
E9PUK6	Serine/arginine repetitive matrix protein 1	Srrm1	1	2	S	0.00185197	RRS(1)PS(1)PPPAR	_RRS(ph)PS(ph)PPPAR_	2	640.787	561
E9PUK6	Serine/arginine repetitive matrix protein 1	Srrm1	1	2	S	0.00185197	RRS(1)PS(1)PPPAR	_RRS(ph)PS(ph)PPPAR_	2	640.787	563
E9PUK6	Serine/arginine repetitive matrix protein 1	Srrm1	1	2	S	0.00633774	RRS(1)PT(1)PPPR	_RRS(ph)PT(ph)PPPR_	3	408.52	591
E9PUK6	Serine/arginine repetitive matrix protein 1	Srrm1	1	2	S	0.0368463	RRT(1)PS(1)PPPR	_RRT(ph)PS(ph)PPPR_	3	408.52	602
E9PUK6	Serine/arginine repetitive matrix protein 1	Srrm1	1	2	S	0.00123417	RVS(1)HS(1)PPPK	_RVS(ph)HS(ph)PPPK_	3	388.837	655
E9PUK6	Serine/arginine repetitive matrix protein 1	Srrm1	1	2	S	0.00123417	RVS(1)HS(1)PPPK	_RVS(ph)HS(ph)PPPK_	3	388.837	657
E9PUK6	Serine/arginine repetitive matrix protein 1	Srrm1	1	2	S	0.0150046	RVS(1)RT(1)PEPK	_RVS(ph)RT(ph)PEPK_	2	615.276	743
E9PUK6	Serine/arginine repetitive matrix protein 1	Srrm1	0.999865	2	S	0.00115049	RYS(1)PS(1)PPPK	_RYS(ph)PS(ph)PPPK_	2	594.746	624
E9PUK6	Serine/arginine repetitive matrix protein 1	Srrm1	0.999809	2	S	0.00115049	RYS(1)PS(1)PPPK	_RYS(ph)PS(ph)PPPK_	2	594.746	626
E9PUK6	Serine/arginine repetitive matrix protein 1	Srrm1	0.99927	2	S	0.00185549	S(0.001)RVS(0.999)VS(1)PGR	_SRVS(ph)VS(ph)PGR_	2	552.734	427
E9PUK6	Serine/arginine repetitive matrix protein 1	Srrm1	0.999986	2	S	0.00185549	S(0.001)RVS(0.999)VS(1)PGR	_SRVS(ph)VS(ph)PGR_	2	552.734	429
E9PUK6	Serine/arginine repetitive matrix protein 1	Srrm1	1	1;2	S	0.00173991	T(1)AS(1)PPPPPKR	_T(ph)AS(ph)PPPPPKR_	2	604.267	635
A2A9Q2	Nardilysin	Nrd1	1	1	S	0.000234443	LGADES(1)EEEGR	_LGADES(ph)EEEGR_	2	636.243	85
A2AAE1	Uncharacterized protein KIAA1109	Kiaa1109	0.613802	1	S	0.00265566	VVFENEQDNNS(0.614)LT(0.386)K	_VVFENEQDNNS(ph)LTK_	2	858.877	2755
A2ACM0	Regulatory-associated protein of mTOR	Rptor	0.822378	1	S	0.00127289	ILDTSSLT(0.001)QS(0.01)APAS(0.822)PT(0.167)NK	_ILDTSSLTQSAPAS(ph)PTNK_	2	955.959	863
Q8CCT4	Transcription elongation factor A protein-like 5	Tceal5	0.999999	1	S	1.06109e-115	GTDDS(1)PKNSQEDLQDR	_GTDDS(ph)PKNSQEDLQDR_	2	942.884	120
A2AEG6	Neuronal membrane glycoprotein M6-b	Gpm6b	1	1	S	1.07151e-05	AKEEQELQDIQS(1)R	_AKEEQELQDIQS(ph)R_	2	827.378	318
A2AEG6	Neuronal membrane glycoprotein M6-b	Gpm6b	0.999975	1	S	2.59242e-05	S(1)KEQLNSYT	_S(ph)KEQLNSYT_	2	575.245	320
A2AFQ0	E3 ubiquitin-protein ligase HUWE1	Huwe1	0.984018	1	S	1.47195e-07	GS(0.001)GT(0.015)AS(0.984)DDEFENLR	_GSGTAS(ph)DDEFENLR_	2	789.309	1907
A2AGQ4	MAP kinase-activating death domain protein	Madd	0.980025	1	S	2.07017e-08	S(0.98)PT(0.02)ENVNTPVGK	_S(ph)PTENVNTPVGK_	2	661.803	1058
Q4QQM4	Tumor protein p53-inducible protein 11	Trp53i11	0.996414	1	S	0.000435145	HS(0.996)QT(0.004)DLVSR	_HS(ph)QTDLVSR_	2	561.751	14
A2AH25	Rho GTPase-activating protein 1	Arhgap1	0.999141	3;4	S	5.22293e-24	SDDS(0.999)KS(0.155)S(0.846)S(0.999)PEPVTHLK	_SDDS(ph)KSS(ph)S(ph)PEPVTHLK_	2	977.368	87
A2AH25	Rho GTPase-activating protein 1	Arhgap1	0.999977	2;3;4	S	2.83508e-53	S(0.003)DDS(0.997)KS(1)S(1)S(1)PEPVTHLK	_SDDS(ph)KS(ph)S(ph)S(ph)PEPVTHLK_	2	1017.35	89
A2AH25	Rho GTPase-activating protein 1	Arhgap1	0.999988	2;3;4	S	2.83508e-53	S(0.003)DDS(0.997)KS(1)S(1)S(1)PEPVTHLK	_SDDS(ph)KS(ph)S(ph)S(ph)PEPVTHLK_	2	1017.35	90
A2AH25	Rho GTPase-activating protein 1	Arhgap1	0.999835	1;2;3;4	S	2.83508e-53	S(0.003)DDS(0.997)KS(1)S(1)S(1)PEPVTHLK	_SDDS(ph)KS(ph)S(ph)S(ph)PEPVTHLK_	2	1017.35	91
A2AI52	Ubiquitin carboxyl-terminal hydrolase	Usp8	0.980662	1	S	2.79792e-11	S(0.002)YS(0.981)S(0.017)PDITQALQEEEKR	_SYS(ph)SPDITQALQEEEKR_	2	1030.96	691
Q9DBC7	cAMP-dependent protein kinase type I-alpha regulatory subunit	Prkar1a	1	1;2	S	0.0172931	EDEIS(1)PPPPNPVVK	_EDEIS(ph)PPPPNPVVK_	2	799.379	83
Q9DBC7	cAMP-dependent protein kinase type I-alpha regulatory subunit	Prkar1a	0.696103	2	S	0.0286033	T(0.696)DS(0.696)REDEIS(0.608)PPPPNPVVK	_T(ph)DS(ph)REDEISPPPPNPVVK_	2	1068.97	77
Q5DTM8	E3 ubiquitin-protein ligase BRE1A	Rnf20	0.5	1	S	4.02736e-08	ALVVPEPEPDS(0.5)DS(0.5)NQER	_ALVVPEPEPDS(ph)DSNQER_	2	981.428	136
Q5DTM8	E3 ubiquitin-protein ligase BRE1A	Rnf20	0.5	1	S	4.02736e-08	ALVVPEPEPDS(0.5)DS(0.5)NQER	_ALVVPEPEPDS(ph)DSNQER_	2	981.428	138
A2AIR7	Voltage-dependent N-type calcium channel subunit alpha-1B	Cacna1b	0.997665	1	S	0.0236632	RGS(0.998)PEEAT(0.002)ER	_RGS(ph)PEEATER_	2	606.256	916
A2AJ21	Neural proliferation differentiation and control protein 1	Npdc1	0.837372	1	S	0.00584734	GPT(0.153)S(0.837)PS(0.005)T(0.005)PR	_GPTS(ph)PSTPR_	2	490.216	245
P41234	ATP-binding cassette sub-family A member 2	Abca2	0.999987	2	S	4.42847e-13	VSEEDQS(1)LENS(1)EADVK	_VSEEDQS(ph)LENS(ph)EADVK_	2	969.866	1327
P41234	ATP-binding cassette sub-family A member 2	Abca2	1	2	S	4.42847e-13	VSEEDQS(1)LENS(1)EADVK	_VSEEDQS(ph)LENS(ph)EADVK_	2	969.866	1331
A2AJA9	Uncharacterized protein C9orf172 homolog	Gm996	1	1	S	0.00101173	S(1)PAQAPEPAAEGLGR	_S(ph)PAQAPEPAAEGLGR_	2	765.851	593
A2AJI0	MAP7 domain-containing protein 1	Map7d1	0.99957	2;3	S	0.00171689	AAEEKEPAAPAS(1)PAPS(0.982)PVPS(0.808)PT(0.211)PAQPQK	_AAEEKEPAAPAS(ph)PAPS(ph)PVPS(ph)PTPAQPQK_	3	997.438	544
A2AJI0	MAP7 domain-containing protein 1	Map7d1	0.982257	2;3	S	0.00171689	AAEEKEPAAPAS(1)PAPS(0.982)PVPS(0.808)PT(0.211)PAQPQK	_AAEEKEPAAPAS(ph)PAPS(ph)PVPS(ph)PTPAQPQK_	3	997.438	548
A2AJI0	MAP7 domain-containing protein 1	Map7d1	0.807585	3	S	0.00171689	AAEEKEPAAPAS(1)PAPS(0.982)PVPS(0.808)PT(0.211)PAQPQK	_AAEEKEPAAPAS(ph)PAPS(ph)PVPS(ph)PTPAQPQK_	3	997.438	552
Q61234	Alpha-1-syntrophin	Snta1	0.944068	1	S	0.00152864	NS(0.001)AGGT(0.002)S(0.01)VGWDS(0.944)PPAS(0.043)PLQR	_NSAGGTSVGWDS(ph)PPASPLQR_	2	1032.46	183
A2ALL9		Atp2b3	0.999487	1	S	0.00161451	S(0.001)GS(0.999)FQGAVR	_SGS(ph)FQGAVR_	2	494.716	1126
A2ALS4		Rap1gap	0.996716	2;3	S	5.63088e-24	SENSS(0.001)T(0.003)QS(0.997)S(1)PEMPTTK	_SENSSTQS(ph)S(ph)PEMPTTK_	2	935.844	605
A2ALS4		Rap1gap	0.999683	1;2;3	S	5.63088e-24	SENSS(0.001)T(0.003)QS(0.997)S(1)PEMPTTK	_SENSSTQS(ph)S(ph)PEMPTTK_	2	935.844	606
A2AP18	1-phosphatidylinositol 4,5-bisphosphate phosphodiesterase eta-2	Plch2	0.999558	1	S	0.000724337	VAS(1)VEEGDETLDSPGSQSR	_VAS(ph)VEEGDETLDSPGSQSR_	2	1021.93	676
Q9D6Z1	Nucleolar protein 56	Nop56	0.999992	1;2	S	1.98572e-08	EEVAS(1)EPEEAAS(0.725)PT(0.121)T(0.153)PK	_EEVAS(ph)EPEEAAS(ph)PTTPK_	2	966.382	536
Q9D6Z1	Nucleolar protein 56	Nop56	0.725188	2	S	1.98572e-08	EEVAS(1)EPEEAAS(0.725)PT(0.121)T(0.153)PK	_EEVAS(ph)EPEEAAS(ph)PTTPK_	2	966.382	543
F7AA26		Gm20459	0.333333		S	0.00945838	LEPAAS(0.333)S(0.333)LS(0.333)PDHK	_LEPAAS(ph)SLSPDHK_	2	716.329	236
F7AA26		Gm20459	0.333333		S	0.00945838	LEPAAS(0.333)S(0.333)LS(0.333)PDHK	_LEPAAS(ph)SLSPDHK_	2	716.329	237
F7AA26		Gm20459	0.333333		S	0.00945838	LEPAAS(0.333)S(0.333)LS(0.333)PDHK	_LEPAAS(ph)SLSPDHK_	2	716.329	239
P43006	Excitatory amino acid transporter 2	Slc1a2	0.5	1	S	0.00782549	AS(0.5)T(0.5)EGANNMPK	_(ac)AS(ph)TEGANNMPK_	2	621.247	3
P43006	Excitatory amino acid transporter 2	Slc1a2	1	2	S	1.16809e-12	MHDS(1)HLS(0.964)S(0.036)DEPK	_M(ox)HDS(ph)HLS(ph)SDEPK_	2	779.768	21
P43006	Excitatory amino acid transporter 2	Slc1a2	0.999992	1;2	S	1.16809e-12	MHDSHLS(1)S(1)DEPK	_M(ox)HDSHLS(ph)S(ph)DEPK_	2	779.768	24
P43006	Excitatory amino acid transporter 2	Slc1a2	0.999998	2	S	1.75777e-06	MHDSHLS(1)S(1)DEPK	_M(ox)HDSHLS(ph)S(ph)DEPK_	2	779.768	25
A2APX8		Scn1a	0.990867	4	S	0.0291886	EPS(0.991)AAGRLS(0.842)DS(0.661)S(0.661)S(0.638)EAS(0.156)KLS(0.033)S(0.018)K	_EPS(ph)AAGRLS(ph)DS(ph)S(ph)SEASKLSSK_	3	805.304	474
A2APX8		Scn1a	0.84209	4	S	0.0291886	EPS(0.991)AAGRLS(0.842)DS(0.661)S(0.661)S(0.638)EAS(0.156)KLS(0.033)S(0.018)K	_EPS(ph)AAGRLS(ph)DS(ph)S(ph)SEASKLSSK_	3	805.304	480
A2APX8		Scn1a	0.660705	4	S	0.0291886	EPS(0.991)AAGRLS(0.842)DS(0.661)S(0.661)S(0.638)EAS(0.156)KLS(0.033)S(0.018)K	_EPS(ph)AAGRLS(ph)DS(ph)S(ph)SEASKLSSK_	3	805.304	482
A2APX8		Scn1a	0.660722	4	S	0.0291886	EPS(0.991)AAGRLS(0.842)DS(0.661)S(0.661)S(0.638)EAS(0.156)KLS(0.033)S(0.018)K	_EPS(ph)AAGRLS(ph)DS(ph)S(ph)SEASKLSSK_	3	805.304	483
B1AWN6	Sodium channel protein type 8 subunit alpha	Scn1a	1	2	S	0.001646	LAKS(1)WPT(1)LNMLIK	_LAKS(ph)WPT(ph)LNMLIK_	2	837.908	864
E9QAU4	Sickle tail protein	Etl4	0.815277	2	S	0.00482427	GDAAGDKLELS(0.369)EDS(0.815)PNS(0.815)EQELDKIGGK	_GDAAGDKLELSEDS(ph)PNS(ph)EQELDKIGGK_	3	988.092	1086
E9QAU4	Sickle tail protein	Etl4	0.815277	2	S	0.00482427	GDAAGDKLELS(0.369)EDS(0.815)PNS(0.815)EQELDKIGGK	_GDAAGDKLELSEDS(ph)PNS(ph)EQELDKIGGK_	3	988.092	1089
Q80TY0	Formin-binding protein 1	Fnbp1	0.998774	1	S	2.05161e-05	TVS(0.999)DNS(0.001)LSSSK	_TVS(ph)DNSLSSSK_	2	602.758	296
A2AQ87		Shf	1	1	S	0.0385469	HGS(1)PPHR	_HGS(ph)PPHR_	2	434.185	144
Q99JP7	Gamma-glutamyltransferase 7	Ggt7	0.994383	2	S	1.61106e-06	LPS(0.002)S(0.002)S(0.002)S(0.001)EMGS(0.994)QDGS(0.999)PLR	_LPSSSSEMGS(ph)QDGS(ph)PLR_	2	947.868	79
Q99JP7	Gamma-glutamyltransferase 7	Ggt7	0.999597	1;2	S	1.61106e-06	LPS(0.001)S(0.004)S(0.015)S(0.057)EMGS(0.924)QDGS(1)PLR	_LPSSSSEM(ox)GS(ph)QDGS(ph)PLR_	2	955.866	83
A2ARP8	Microtubule-associated protein 1A	Mtap1a	0.999974	1	S	9.14345e-11	AELEEMEEVHPS(1)DEEEEETK	_AELEEM(ox)EEVHPS(ph)DEEEEETK_	2	1242.98	905
A2ARP8	Microtubule-associated protein 1A	Mtap1a	1	2	S	3.09331e-86	ELALS(1)S(1)PEDLTQDFEELKR	_ELALS(ph)S(ph)PEDLTQDFEELKR_	2	1190.52	764
A2ARP8	Microtubule-associated protein 1A	Mtap1a	1	2	S	3.09331e-86	ELALS(1)S(1)PEDLTQDFEELKR	_ELALS(ph)S(ph)PEDLTQDFEELKR_	2	1190.52	765
A2ARP8	Microtubule-associated protein 1A	Mtap1a	1	1	S	9.67156e-27	EMTLDQKS(1)PEK	_EMTLDQKS(ph)PEK_	2	693.305	1818
A2ARP8	Microtubule-associated protein 1A	Mtap1a	0.465493		S	9.90175e-07	ET(0.361)S(0.465)PT(0.173)RGEPVPAWEGKS(1)PEQEVR	_ETS(ph)PTRGEPVPAWEGKS(ph)PEQEVR_	3	909.4	1872
A2ARP8	Microtubule-associated protein 1A	Mtap1a	1	1;2	S	9.90175e-07	GEPVPAWEGKS(1)PEQEVR	_GEPVPAWEGKS(ph)PEQEVR_	2	987.951	1886
A2ARP8	Microtubule-associated protein 1A	Mtap1a	0.988484	1;2	S	3.54118e-09	VAELEEEQS(0.988)QGS(0.817)S(0.159)S(0.032)Y(0.001)S(0.002)DWVK	_VAELEEEQS(ph)QGS(ph)SSYSDWVK_	2	1209.47	352
A2ARP8	Microtubule-associated protein 1A	Mtap1a	0.934008	2;3	S	3.54118e-09	KVAELEEEQS(0.988)QGS(0.934)S(0.059)S(0.017)Y(0.001)S(0.001)DWVK	_KVAELEEEQS(ph)QGS(ph)SSYSDWVK_	3	849.351	355
A2ARP8	Microtubule-associated protein 1A	Mtap1a	0.999956	1;2	S	1.17076e-29	MAS(1)PPPSGPPSAAHTPFHQS(1)PVEEK	_M(ox)AS(ph)PPPSGPPSAAHTPFHQS(ph)PVEEK_	3	920.391	1229
A2ARP8	Microtubule-associated protein 1A	Mtap1a	0.999617	2	S	1.17076e-29	MAS(1)PPPSGPPSAAHTPFHQS(1)PVEEK	_M(ox)AS(ph)PPPSGPPSAAHTPFHQS(ph)PVEEK_	3	920.391	1246
A2ARP8	Microtubule-associated protein 1A	Mtap1a	0.901692	2;4	S	1.61088e-10	PASPALS(0.002)EGS(0.902)S(0.902)S(0.165)EAT(0.022)T(0.007)PVISSVAER	_PASPALSEGS(ph)S(ph)SEATTPVISSVAER_	2	1295.57	2471
A2ARP8	Microtubule-associated protein 1A	Mtap1a	0.901692	2;4	S	1.61088e-10	PASPALS(0.002)EGS(0.902)S(0.902)S(0.165)EAT(0.022)T(0.007)PVISSVAER	_PASPALSEGS(ph)S(ph)SEATTPVISSVAER_	2	1295.57	2472
A2ARP8	Microtubule-associated protein 1A	Mtap1a	0.552863	2;4	S	7.78333e-05	PAS(0.001)PALS(0.087)EGS(0.553)S(0.553)S(0.553)EAT(0.191)T(0.061)PVIS(0.001)S(0.001)VAER	_PASPALSEGS(ph)S(ph)SEATTPVISSVAER_	3	864.049	2473
A2ARP8	Microtubule-associated protein 1A	Mtap1a	0.997893	1	S	4.8797e-13	SEPQDFQEDS(0.998)WGDT(0.002)K	_SEPQDFQEDS(ph)WGDTK_	2	924.852	1261
A2ARP8	Microtubule-associated protein 1A	Mtap1a	0.999965	1	S	3.04491e-38	SHWDDGTNDS(1)DLEK	_SHWDDGTNDS(ph)DLEK_	2	849.818	2320
A2ARP8	Microtubule-associated protein 1A	Mtap1a	1	1;2	S	2.44821e-58	SPFEIIS(1)PPAS(1)PPEMTGQR	_SPFEIIS(ph)PPAS(ph)PPEM(ox)TGQR_	3	739.649	2006
A2ARP8	Microtubule-associated protein 1A	Mtap1a	0.999989	1;2	S	2.44821e-58	SPFEIIS(1)PPAS(1)PPEMTGQR	_SPFEIIS(ph)PPAS(ph)PPEM(ox)TGQR_	3	739.649	2010
A2ARP8	Microtubule-associated protein 1A	Mtap1a	0.925513	1	S	0.0012431	S(0.926)PT(0.074)PGKGPVDR	_S(ph)PTPGKGPVDR_	2	595.782	2841
A2ARP8	Microtubule-associated protein 1A	Mtap1a	0.972806	1;2;3	S	1.08397e-32	TEATQGLDYVPS(0.003)AGT(0.023)IS(0.973)PT(0.63)S(0.703)S(0.669)LEEDKGFK	_TEATQGLDYVPSAGTIS(ph)PTS(ph)S(ph)LEEDKGFK_	3	1090.13	1133
A2ARP8	Microtubule-associated protein 1A	Mtap1a	0.702741	3	S	2.98139e-18	TEATQGLDYVPS(0.003)AGT(0.023)IS(0.973)PT(0.63)S(0.703)S(0.669)LEEDKGFK	_TEATQGLDYVPSAGTIS(ph)PTS(ph)S(ph)LEEDKGFK_	3	1090.13	1136
A2ARP8	Microtubule-associated protein 1A	Mtap1a	0.668605	2;3	S	1.08397e-32	TEATQGLDYVPS(0.003)AGT(0.023)IS(0.973)PT(0.63)S(0.703)S(0.669)LEEDKGFK	_TEATQGLDYVPSAGTIS(ph)PTS(ph)S(ph)LEEDKGFK_	3	1090.13	1137
A2ARP8	Microtubule-associated protein 1A	Mtap1a	1	1;2	S	3.2657e-32	VPSAPGQES(1)PVPDTK	_VPSAPGQES(ph)PVPDTK_	2	794.866	2027
A2ARS0	Ankyrin repeat domain-containing protein 63	Ankrd63	0.940812	1;2	S	0.000635327	GS(0.005)NS(0.054)DS(0.941)PPGHPAPAPS(1)PERR	_GSNSDS(ph)PPGHPAPAPS(ph)PERR_	3	724.967	193
A2ARS0	Ankyrin repeat domain-containing protein 63	Ankrd63	0.999919	2	S	0.000949495	GS(0.005)NS(0.054)DS(0.941)PPGHPAPAPS(1)PERR	_GSNSDS(ph)PPGHPAPAPS(ph)PERR_	3	724.967	203
A2AUD5	Tumor protein D54	Tpd52l2	0.997942	1	S	0.0019977	NSAT(0.002)FKS(0.998)FEDR	_NSATFKS(ph)FEDR_	2	691.293	189
Q80YN3	Breast carcinoma-amplified sequence 1 homolog	Bcas1	0.981474	1	S	1.07677e-07	T(0.019)PS(0.981)PPEPEPAGTAQK	_TPS(ph)PPEPEPAGTAQK_	2	793.859	525
Q08943	FACT complex subunit SSRP1	Ssrp1	0.999925	1	S	1.221e-10	EGINPGYDDYADS(1)DEDQHDAYLER	_EGINPGYDDYADS(ph)DEDQHDAYLER_	3	956.37	444
A2BFF9	Cytoplasmic dynein 1 intermediate chain 2	Dync1i2	0.999943	2	S	8.82368e-21	SVSTPSEAGS(1)QDS(1)GDGAVGSR	_SVSTPSEAGS(ph)QDS(ph)GDGAVGSR_	2	1055.9	101
A2BFF9	Cytoplasmic dynein 1 intermediate chain 2	Dync1i2	0.999861	2	S	8.82368e-21	SVSTPSEAGS(1)QDS(1)GDGAVGSR	_SVSTPSEAGS(ph)QDS(ph)GDGAVGSR_	2	1055.9	104
Q99JF8	PC4 and SFRS1-interacting protein	Psip1	0.36843		S	3.09e-07	NLAKPGVT(0.087)S(0.368)T(0.368)S(0.368)DS(0.808)EDEDDQEGEK	_NLAKPGVTS(ph)TSDS(ph)EDEDDQEGEK_	2	1306	270
Q99JF8	PC4 and SFRS1-interacting protein	Psip1	0.456937		S	2.9785e-10	NLAKPGVT(0.109)S(0.085)T(0.457)S(0.457)DS(0.892)EDEDDQEGEK	_NLAKPGVTST(ph)SDS(ph)EDEDDQEGEK_	3	871.004	272
Q99JF8	PC4 and SFRS1-interacting protein	Psip1	0.892304	2	S	2.9785e-10	NLAKPGVT(0.109)S(0.085)T(0.457)S(0.457)DS(0.892)EDEDDQEGEK	_NLAKPGVTST(ph)SDS(ph)EDEDDQEGEK_	3	871.004	274
Q99JF8	PC4 and SFRS1-interacting protein	Psip1	0.930127	1	S	4.56583e-14	QSNAS(0.07)S(0.93)DVEVEEK	_QSNASS(ph)DVEVEEK_	2	751.306	106
Q8C8K3	Serine/arginine-rich splicing factor 12	Srsf12	1	2	S	0.0209854	S(1)KS(1)LPKR	_S(ph)KS(ph)LPKR_	2	488.225	187
Q8C8K3	Serine/arginine-rich splicing factor 12	Srsf12	1	2	S	0.0209854	S(1)KS(1)LPKR	_S(ph)KS(ph)LPKR_	2	488.225	189
Q61036	Serine/threonine-protein kinase PAK 3	Pak3	0.522272	1	S	0.00831454	S(0.478)DS(0.522)LDNEEKPPAPPLR	_(ac)SDS(ph)LDNEEKPPAPPLR_	2	943.93	4
E9Q447	Spectrin alpha chain, brain	Spna2	1	1	S	5.94059e-05	S(1)LQQLAEER	_S(ph)LQQLAEER_	2	577.266	1197
E9QAD8	IQ motif and SEC7 domain-containing protein 2	Iqsec2	0.498608		S	0.00849116	S(0.499)S(0.499)LEDT(0.002)Y(0.001)GAGDGLK	_S(ph)SLEDTYGAGDGLK_	2	746.814	1123
E9QAD8	IQ motif and SEC7 domain-containing protein 2	Iqsec2	0.498608		S	0.00849116	S(0.499)S(0.499)LEDT(0.002)Y(0.001)GAGDGLK	_S(ph)SLEDTYGAGDGLK_	2	746.814	1124
E9QAD8	IQ motif and SEC7 domain-containing protein 2	Iqsec2	0.312854		S	0.00255274	S(0.313)S(0.313)S(0.288)PGAGGGHS(0.064)T(0.015)S(0.004)T(0.001)STSPATTLQR	_S(ph)SSPGAGGGHSTSTSTSPATTLQR_	3	771.343	212
E9QAD8	IQ motif and SEC7 domain-containing protein 2	Iqsec2	0.312854		S	0.00255274	S(0.313)S(0.313)S(0.288)PGAGGGHS(0.064)T(0.015)S(0.004)T(0.001)STSPATTLQR	_S(ph)SSPGAGGGHSTSTSTSPATTLQR_	3	771.343	213
A6MDD2	Receptor-type tyrosine-protein phosphatase-like N	Ptprn	0.943933	1	S	7.65107e-24	AEDS(0.944)S(0.056)EGHEEEVLGGR	_AEDS(ph)SEGHEEEVLGGR_	2	890.855	309
A6X919	Protein dpy-19 homolog 1	Dpy19l1	0.49649		S	0.00085613	S(0.496)S(0.496)PPPLS(0.006)GAS(0.001)EVDAGELGSER	_S(ph)SPPPLSGASEVDAGELGSER_	2	1061.47	22
A6X919	Protein dpy-19 homolog 1	Dpy19l1	0.49649		S	0.00085613	S(0.496)S(0.496)PPPLS(0.006)GAS(0.001)EVDAGELGSER	_S(ph)SPPPLSGASEVDAGELGSER_	2	1061.47	23
A6ZI44	Fructose-bisphosphate aldolase	Aldoa	0.847508	1	S	2.73856e-10	GILAADES(0.848)T(0.132)GS(0.021)IAK	_GILAADES(ph)TGSIAK_	2	706.837	90
A6ZI44	Fructose-bisphosphate aldolase	Aldoa	0.765602	1	S	3.66071e-06	GILAADES(0.036)T(0.199)GS(0.766)IAK	_GILAADESTGS(ph)IAK_	2	706.837	93
A9DA50	Leucine-rich repeat and immunoglobulin-like domain-containing nogo receptor-interacting protein 1	Lingo1	0.999956	1	S	4.88879e-05	KS(1)DAGISSADAPR	_KS(ph)DAGISSADAPR_	2	677.804	602
B0QZN5	Vesicle-associated membrane protein 2	Vamp2	0.981723	1	S	4.53923e-06	ADALQAGAS(0.982)QFET(0.008)S(0.01)AAK	_ADALQAGAS(ph)QFETSAAK_	2	873.391	75
B1AQD9	Protein unc-119 homolog A	Unc119	0.999971	2;3	S	5.99929e-16	SAEPTREPGAEAES(1)GS(1)ES(1)EPEPGPGPR	_SAEPTREPGAEAES(ph)GS(ph)ES(ph)EPEPGPGPR_	3	983.04	37
B1AQD9	Protein unc-119 homolog A	Unc119	0.999971	2;3	S	5.99929e-16	SAEPTREPGAEAES(1)GS(1)ES(1)EPEPGPGPR	_SAEPTREPGAEAES(ph)GS(ph)ES(ph)EPEPGPGPR_	3	983.04	39
B1AQD9	Protein unc-119 homolog A	Unc119	0.999993	3	S	1.38239e-07	SAEPTREPGAEAES(1)GS(1)ES(1)EPEPGPGPR	_SAEPTREPGAEAES(ph)GS(ph)ES(ph)EPEPGPGPR_	3	983.04	41
B1AQW2	Microtubule-associated protein	Mapt	0.989184	2	S	0.000223423	IPAKT(0.164)T(0.847)PS(0.989)PK	_IPAKTT(ph)PS(ph)PK_	2	600.277	109
Q9QWI6	SRC kinase signaling inhibitor 1	Srcin1	0.997769	1;2	S	5.02664e-53	KDS(0.998)GS(0.002)SSVFAES(1)PGGK	_KDS(ph)GSSSVFAES(ph)PGGK_	2	850.334	579
Q9QWI6	SRC kinase signaling inhibitor 1	Srcin1	1	1;2	S	5.02664e-53	KDS(0.998)GS(0.002)SSVFAES(1)PGGK	_KDS(ph)GSSSVFAES(ph)PGGK_	2	850.334	588
Q9QWI6	SRC kinase signaling inhibitor 1	Srcin1	1	1	S	3.26552e-12	RGS(1)DELTVPR	_RGS(ph)DELTVPR_	2	605.285	1054
B1AQY2	Rho GTPase-activating protein 23	Arhgap23	1	1	S	7.82133e-05	S(1)AEALGPGALVSPR	_S(ph)AEALGPGALVSPR_	2	702.848	366
B1AQZ0	Septin-8	2015-09-08	0.97196	1	S	0.00014275	AAT(0.028)DLERVS(0.972)NAEPEPR	_(ac)AATDLERVS(ph)NAEPEPR_	2	938.925	10
B1AQZ2	Kinesin-like protein KIF3A	Kif3a	1	3;4	S	8.40796e-25	KLEEGEEVS(1)GS(1)DIS(1)GS(1)EEDDEEGELGEDGEKK	_KLEEGEEVS(ph)GS(ph)DIS(ph)GS(ph)EEDDEEGELGEDGEKK_	3	1244.45	381
B1AQZ2	Kinesin-like protein KIF3A	Kif3a	1	3;4	S	8.40796e-25	KLEEGEEVS(1)GS(1)DIS(1)GS(1)EEDDEEGELGEDGEKK	_KLEEGEEVS(ph)GS(ph)DIS(ph)GS(ph)EEDDEEGELGEDGEKK_	3	1244.45	383
B1AQZ2	Kinesin-like protein KIF3A	Kif3a	1	3;4	S	8.40796e-25	KLEEGEEVS(1)GS(1)DIS(1)GS(1)EEDDEEGELGEDGEKK	_KLEEGEEVS(ph)GS(ph)DIS(ph)GS(ph)EEDDEEGELGEDGEKK_	3	1244.45	386
B1AQZ2	Kinesin-like protein KIF3A	Kif3a	1	3;4	S	8.40796e-25	KLEEGEEVS(1)GS(1)DIS(1)GS(1)EEDDEEGELGEDGEKK	_KLEEGEEVS(ph)GS(ph)DIS(ph)GS(ph)EEDDEEGELGEDGEKK_	3	1244.45	388
B1AR17		Chd3	0.9828	1;2	S	0.0124078	MEAEVDS(0.983)PS(0.944)PAPS(0.073)LGER	_M(ox)EAEVDS(ph)PS(ph)PAPSLGER_	2	974.376	1651
B1AR17		Chd3	0.943884	2	S	0.0124078	MEAEVDS(0.983)PS(0.944)PAPS(0.073)LGER	_M(ox)EAEVDS(ph)PS(ph)PAPSLGER_	2	974.376	1653
E9PVY8	Microtubule-actin cross-linking factor 1	Macf1	1	1	S	2.07292e-17	LLDAEDVDVPS(1)PDEK	_LLDAEDVDVPS(ph)PDEK_	2	861.38	280
Q6PFD5	Disks large-associated protein 3	Dlgap3	0.999959	1	S	0.000131549	S(1)LDSVDR	_S(ph)LDSVDR_	2	436.181	930
Q0VF59	Disks large-associated protein 3	Dlgap3	0.999874	1	S	0.0170886	SHS(1)YLR	_SHS(ph)YLR_	2	421.681	575
Q8VBY2	Calcium/calmodulin-dependent protein kinase kinase 1	Camkk1	1	1	S	0.000856769	S(1)FGNPFEPQAR	_S(ph)FGNPFEPQAR_	2	665.285	458
E9PVU7	cAMP-specific 3',5'-cyclic phosphodiesterase 4D	Pde4d	1	1	S	4.99042e-08	SDSDYDLS(1)PK	_SDSDYDLS(ph)PK_	2	603.732	197
B1AWD9	Clathrin light chain A	Clta	0.999999	1	S	4.84382e-05	LQS(1)EPESIR	_LQS(ph)EPESIR_	2	569.761	105
B1AWN6		Scn2a1	0.897168	3	S	2.92606e-09	DFSGAGGIGVFS(0.322)ES(0.897)S(0.899)S(0.85)VAS(0.032)K	_DFSGAGGIGVFSES(ph)S(ph)S(ph)VASK_	2	1064.9	486
B1AWN6		Scn2a1	0.898667	3	S	2.92606e-09	DFSGAGGIGVFS(0.322)ES(0.897)S(0.899)S(0.85)VAS(0.032)K	_DFSGAGGIGVFSES(ph)S(ph)S(ph)VASK_	2	1064.9	487
B1AWN6		Scn2a1	0.849738	3	S	2.92606e-09	DFSGAGGIGVFS(0.322)ES(0.897)S(0.899)S(0.85)VAS(0.032)K	_DFSGAGGIGVFSES(ph)S(ph)S(ph)VASK_	2	1064.9	488
Q5DTL9	Sodium-driven chloride bicarbonate exchanger	Slc4a10	0.993634	1	S	1.1115e-71	DSGLEDGRES(0.994)PS(0.006)FDTPSQR	_DSGLEDGRES(ph)PSFDTPSQR_	2	1080.45	89
B1AXZ5	ELAV-like protein 2	Elavl2	0.597008	1	S	0.0184685	TNQAILS(0.164)QLY(0.239)QS(0.597)PNR	_TNQAILSQLYQS(ph)PNR_	2	906.936	250
E9PV45	Ubiquitin carboxyl-terminal hydrolase	Usp24	0.999995	1	S	0.000146832	VSDQNS(1)PVLPK	_VSDQNS(ph)PVLPK_	2	632.303	2045
Q8BKX1	Brain-specific angiogenesis inhibitor 1-associated protein 2	Baiap2	0.997651	1	S	0.000286704	S(0.002)LS(0.998)PPQSQSK	_SLS(ph)PPQSQSK_	2	569.761	326
Q8R550	SH3 domain-containing kinase-binding protein 1	Sh3kbp1	0.998553	1	S	6.37745e-14	ELS(0.999)GES(0.001)DELGISQDEQLSK	_ELS(ph)GESDELGISQDEQLSK_	2	1072.47	156
Q8R550	SH3 domain-containing kinase-binding protein 1	Sh3kbp1	1	1	S	0.00125651	S(1)IEVENDFLPVEK	_S(ph)IEVENDFLPVEK_	2	799.871	274
B1AZI6	THO complex subunit 2	Thoc2	1	1	S	0.0379156	ES(1)RHDKEK	_ES(ph)RHDKEK_	2	554.743	1562
B1AZP2	Disks large-associated protein 4	Dlgap4	0.975457	1	S	1.81899e-05	AMGDEDS(0.975)DES(0.021)GGGS(0.003)PKPSPK	_AM(ox)GDEDS(ph)DESGGGSPKPSPK_	2	1022.4	377
B1AZP2	Disks large-associated protein 4	Dlgap4	1	1	S	3.72311e-21	ATQQS(1)LGEQSNPR	_ATQQS(ph)LGEQSNPR_	2	748.33	405
B1AZP2	Disks large-associated protein 4	Dlgap4	0.375863		S	0.00599707	S(0.01)EVT(0.12)S(0.376)QS(0.274)GLS(0.352)NS(0.368)S(0.368)DS(0.473)LDS(0.183)S(0.177)T(0.17)RPPS(0.065)VT(0.065)R	_SEVTS(ph)QSGLS(ph)NSSDS(ph)LDSSTRPPSVTR_	3	1007.74	601
B1AZP2	Disks large-associated protein 4	Dlgap4	0.35242		S	0.00599707	S(0.01)EVT(0.12)S(0.376)QS(0.274)GLS(0.352)NS(0.368)S(0.368)DS(0.473)LDS(0.183)S(0.177)T(0.17)RPPS(0.065)VT(0.065)R	_SEVTS(ph)QSGLS(ph)NSSDS(ph)LDSSTRPPSVTR_	3	1007.74	606
B1AZP2	Disks large-associated protein 4	Dlgap4	0.367541		S	0.00599707	S(0.01)EVT(0.12)S(0.376)QS(0.274)GLS(0.352)NS(0.368)S(0.368)DS(0.473)LDS(0.183)S(0.177)T(0.17)RPPS(0.065)VT(0.065)R	_SEVTS(ph)QSGLS(ph)NSSDS(ph)LDSSTRPPSVTR_	3	1007.74	608
B1AZP2	Disks large-associated protein 4	Dlgap4	0.973086	2	S	1.12301e-22	SEVTSQSGLS(0.003)NS(0.022)S(0.973)DS(0.988)LDS(0.004)S(0.004)T(0.004)RPPS(0.001)VTR	_SEVTSQSGLSNSS(ph)DS(ph)LDSSTRPPSVTR_	3	981.087	609
B1AZP2	Disks large-associated protein 4	Dlgap4	0.988257	2	S	1.12301e-22	SEVTSQSGLS(0.003)NS(0.022)S(0.973)DS(0.988)LDS(0.004)S(0.004)T(0.004)RPPS(0.001)VTR	_SEVTSQSGLSNSS(ph)DS(ph)LDSSTRPPSVTR_	3	981.087	611
B2KF50		Uhrf1bp1	1	1	S	5.01445e-07	DGS(1)GENLAASQER	_DGS(ph)GENLAASQER_	2	707.286	929
B2RQ80	Traf2 and NCK-interacting protein kinase	Tnik	1	1	S	1.32875e-10	QNS(1)DPTSENPPLPTR	_QNS(ph)DPTSENPPLPTR_	2	866.881	640
B2RQ80	Traf2 and NCK-interacting protein kinase	Tnik	0.995635	1	S	2.88135e-07	S(0.004)EGS(0.996)PVLPHEPSK	_SEGS(ph)PVLPHEPSK_	2	722.329	769
E9QAX2	Unconventional myosin-XVIIIa	Myo18a	0.999957	2	S	1.1472e-38	FSHSYLS(1)DS(0.996)DT(0.004)EAK	_FSHSYLS(ph)DS(ph)DTEAK_	2	873.818	2070
E9QAX2	Unconventional myosin-XVIIIa	Myo18a	0.995565	1;2	S	1.1472e-38	FSHSYLS(1)DS(0.996)DT(0.004)EAK	_FSHSYLS(ph)DS(ph)DTEAK_	2	873.818	2072
E9QAX2	Unconventional myosin-XVIIIa	Myo18a	0.478542		S	0.00711856	S(0.081)RDES(0.28)AS(0.479)ET(0.531)S(0.738)T(0.733)PS(0.67)EHS(0.375)AAPS(0.114)PQVEVR	_SRDESAS(ph)ETS(ph)T(ph)PS(ph)EHSAAPSPQVEVR_	3	1021.05	151
E9QAX2	Unconventional myosin-XVIIIa	Myo18a	0.737553	3;4	S	2.74331e-07	S(0.081)RDES(0.28)AS(0.479)ET(0.531)S(0.738)T(0.733)PS(0.67)EHS(0.375)AAPS(0.114)PQVEVR	_SRDESAS(ph)ETS(ph)T(ph)PS(ph)EHSAAPSPQVEVR_	3	1021.05	154
E9QAX2	Unconventional myosin-XVIIIa	Myo18a	0.946671	3;4	S	2.74331e-07	S(0.001)RDES(0.013)AS(0.197)ET(0.612)S(0.622)T(0.569)PS(0.947)EHS(0.04)AAPSPQVEVR	_SRDESASET(ph)S(ph)TPS(ph)EHSAAPSPQVEVR_	3	994.391	157
E9QAX2	Unconventional myosin-XVIIIa	Myo18a	0.509858	3	S	0.00622134	S(0.092)RDES(0.092)AS(0.212)ET(0.51)S(0.51)T(0.51)PS(0.51)EHS(0.51)AAPS(0.054)PQVEVR	_SRDESASET(ph)S(ph)T(ph)PSEHSAAPSPQVEVR_	4	746.045	160
B2RRE7	OTU domain-containing protein 4	Otud4	0.997079	2	S	0.00255911	LQRPKEES(0.997)S(0.997)EDENEVS(0.006)NILR	_LQRPKEES(ph)S(ph)EDENEVSNILR_	3	844.705	1016
B2RRE7	OTU domain-containing protein 4	Otud4	0.997079	2	S	0.00255911	LQRPKEES(0.997)S(0.997)EDENEVS(0.006)NILR	_LQRPKEES(ph)S(ph)EDENEVSNILR_	3	844.705	1017
B7ZNX6	Protein LAP2	Erbb2ip	0.851466	2	S	0.00501428	HIVNHDDVFEES(0.297)EELS(0.851)S(0.851)DEEMK	_HIVNHDDVFEESEELS(ph)S(ph)DEEM(ox)K_	3	932.021	599
B7ZNX6	Protein LAP2	Erbb2ip	0.851466	2	S	0.00501428	HIVNHDDVFEES(0.297)EELS(0.851)S(0.851)DEEMK	_HIVNHDDVFEESEELS(ph)S(ph)DEEM(ox)K_	3	932.021	600
B2RUJ5	Amyloid beta A4 precursor protein-binding family A member 1	Apba1	0.860416	3	S	0.017564	LHHY(0.41)DERS(0.86)DGES(0.86)DS(0.86)PEKEAEFAPY(0.009)PR	_LHHYDERS(ph)DGES(ph)DS(ph)PEKEAEFAPYPR_	4	826.069	246
B2RUJ5	Amyloid beta A4 precursor protein-binding family A member 1	Apba1	0.860416	3	S	0.017564	LHHY(0.41)DERS(0.86)DGES(0.86)DS(0.86)PEKEAEFAPY(0.009)PR	_LHHYDERS(ph)DGES(ph)DS(ph)PEKEAEFAPYPR_	4	826.069	250
B2RUJ5	Amyloid beta A4 precursor protein-binding family A member 1	Apba1	0.860416	3	S	0.017564	LHHY(0.41)DERS(0.86)DGES(0.86)DS(0.86)PEKEAEFAPY(0.009)PR	_LHHYDERS(ph)DGES(ph)DS(ph)PEKEAEFAPYPR_	4	826.069	252
B2RUJ5	Amyloid beta A4 precursor protein-binding family A member 1	Apba1	0.998677	1	S	1.03166e-116	S(0.001)NS(0.999)QENVEASHPSQDGK	_SNS(ph)QENVEASHPSQDGK_	2	947.384	573
B7ZCJ1	Rho GTPase-activating protein 21	Arhgap21	0.999904	2;3	S	0.00188553	KGS(1)S(0.999)S(0.995)EVFS(0.006)DAAR	_KGS(ph)S(ph)S(ph)EVFSDAAR_	2	790.775	928
B7ZCJ1	Rho GTPase-activating protein 21	Arhgap21	0.998842	2;3	S	0.00188553	KGS(1)S(0.999)S(0.995)EVFS(0.006)DAAR	_KGS(ph)S(ph)S(ph)EVFSDAAR_	2	790.775	929
B7ZCJ1	Rho GTPase-activating protein 21	Arhgap21	0.99504	3	S	0.00188553	KGS(1)S(0.999)S(0.995)EVFS(0.006)DAAR	_KGS(ph)S(ph)S(ph)EVFSDAAR_	2	790.775	930
J3QNK8	Abl interactor 1	Abi1	0.960225	1	S	1.65944e-05	TNPPT(0.002)QKPPS(0.96)PPVS(0.038)GR	_TNPPTQKPPS(ph)PPVSGR_	2	870.427	183
Q8VH51	RNA-binding protein 39	Rbm39	0.999991	1	S	6.80646e-06	DKS(1)PVREPIDNLTPEER	_DKS(ph)PVREPIDNLTPEER_	3	692.332	136
Q8VH51	RNA-binding protein 39	Rbm39	1	2	S	0.0171903	S(1)KS(1)PFRK	_S(ph)KS(ph)PFRK_	2	505.217	127
Q8VH51	RNA-binding protein 39	Rbm39	1	2	S	0.0171903	S(1)KS(1)PFRK	_S(ph)KS(ph)PFRK_	2	505.217	129
Q3UHU5	Coiled-coil domain-containing protein 165	Ccdc165	0.997651	2	S	0.00975942	GRS(0.998)PS(0.989)PLGVGS(0.008)ET(0.005)FR	_GRS(ph)PS(ph)PLGVGSETFR_	2	853.869	1799
Q3UHU5	Coiled-coil domain-containing protein 165	Ccdc165	0.989418	2	S	0.00975942	GRS(0.998)PS(0.989)PLGVGS(0.008)ET(0.005)FR	_GRS(ph)PS(ph)PLGVGSETFR_	2	853.869	1801
P39447	Tight junction protein ZO-1	Tjp1	0.857754	2	S	1.70698e-05	VQIPVS(0.032)HPDPEPVS(0.858)DNEDDS(0.815)Y(0.296)DEEVHDPR	_VQIPVSHPDPEPVS(ph)DNEDDS(ph)YDEEVHDPR_	3	1159.47	125
P39447	Tight junction protein ZO-1	Tjp1	0.81479	2	S	1.70698e-05	VQIPVS(0.032)HPDPEPVS(0.858)DNEDDS(0.815)Y(0.296)DEEVHDPR	_VQIPVSHPDPEPVS(ph)DNEDDS(ph)YDEEVHDPR_	3	1159.47	131
B9EJ86	Oxysterol-binding protein	Osbpl8	0.982059	4	S	0.00410655	GY(0.025)S(0.982)S(0.982)PEPDIQDS(0.614)S(0.597)GS(0.562)EAQS(0.184)VKPS(0.027)T(0.027)R	_GYS(ph)S(ph)PEPDIQDS(ph)S(ph)GSEAQSVKPSTR_	3	977.025	798
B9EJ86	Oxysterol-binding protein	Osbpl8	0.982419	4	S	0.00410655	GY(0.025)S(0.982)S(0.982)PEPDIQDS(0.614)S(0.597)GS(0.562)EAQS(0.184)VKPS(0.027)T(0.027)R	_GYS(ph)S(ph)PEPDIQDS(ph)S(ph)GSEAQSVKPSTR_	3	977.025	799
B9EJ86	Oxysterol-binding protein	Osbpl8	0.99584	2;3;4	S	5.70872e-30	GYSSPEPDIQDS(0.996)S(0.996)GS(0.997)EAQS(0.01)VKPSTR	_GYSSPEPDIQDS(ph)S(ph)GS(ph)EAQSVKPSTR_	3	950.37	807
B9EJ86	Oxysterol-binding protein	Osbpl8	0.996276	2;3;4	S	2.41314e-23	GYSSPEPDIQDS(0.996)S(0.996)GS(0.997)EAQS(0.01)VKPSTR	_GYSSPEPDIQDS(ph)S(ph)GS(ph)EAQSVKPSTR_	3	950.37	808
B9EJ86	Oxysterol-binding protein	Osbpl8	0.99701	2;3;4	S	5.70872e-30	GYSSPEPDIQDS(0.996)S(0.996)GS(0.997)EAQS(0.01)VKPSTR	_GYSSPEPDIQDS(ph)S(ph)GS(ph)EAQSVKPSTR_	3	950.37	810
D3YTL8	Protein spire homolog 1	Spire1	1	2;3	S	8.39043e-24	APTLAELDS(1)S(1)DS(1)EEEK	_APTLAELDS(ph)S(ph)DS(ph)EEEK_	2	980.841	292
D3YTL8	Protein spire homolog 1	Spire1	1	2;3	S	8.39043e-24	APTLAELDS(1)S(1)DS(1)EEEK	_APTLAELDS(ph)S(ph)DS(ph)EEEK_	2	980.841	293
D3YTL8	Protein spire homolog 1	Spire1	1	2;3	S	8.39043e-24	APTLAELDS(1)S(1)DS(1)EEEK	_APTLAELDS(ph)S(ph)DS(ph)EEEK_	2	980.841	295
Q9CYT6	Adenylyl cyclase-associated protein 2	Cap2	0.999019	2;4	S	6.92014e-44	AQGQIRS(0.282)PT(0.571)KT(0.187)HT(0.961)PS(0.999)PT(0.033)S(0.967)PK	_AQGQIRSPT(ph)KTHT(ph)PS(ph)PTS(ph)PK_	3	813.668	308
Q9CYT6	Adenylyl cyclase-associated protein 2	Cap2	0.967268	2;4	S	6.92014e-44	AQGQIRS(0.282)PT(0.571)KT(0.187)HT(0.961)PS(0.999)PT(0.033)S(0.967)PK	_AQGQIRSPT(ph)KTHT(ph)PS(ph)PTS(ph)PK_	3	813.668	311
Q9CYT6	Adenylyl cyclase-associated protein 2	Cap2	0.492642		S	0.0103732	S(0.36)NS(0.493)PQKHT(0.148)PVLELEGK	_SNS(ph)PQKHTPVLELEGK_	3	615.303	316
Q68FD9	UPF0606 protein KIAA1549	Kiaa1549	0.824409	2	S	1.04947e-08	GHYEFPVVDDLS(0.824)S(0.824)GDT(0.351)K	_GHYEFPVVDDLS(ph)S(ph)GDTK_	2	1013.4	1543
Q68FD9	UPF0606 protein KIAA1549	Kiaa1549	0.824409	2	S	1.04947e-08	GHYEFPVVDDLS(0.824)S(0.824)GDT(0.351)K	_GHYEFPVVDDLS(ph)S(ph)GDTK_	2	1013.4	1544
Q68FD9	UPF0606 protein KIAA1549	Kiaa1549	0.92722	1;2	S	0.000612877	LIT(0.027)T(0.973)DS(0.927)DGT(0.071)Y(0.002)K	_LITT(ph)DS(ph)DGTYK_	2	687.267	1613
D3YU56	Inner nuclear membrane protein Man1	Lemd3	0.657342	2	S	0.00227602	EHY(0.685)S(0.657)DS(0.657)EEEEEEGEEDGDVAPAR	_EHY(ph)S(ph)DSEEEEEEGEEDGDVAPAR_	3	923.318	258
D3YU56	Inner nuclear membrane protein Man1	Lemd3	0.657342	2	S	0.00227602	EHY(0.685)S(0.657)DS(0.657)EEEEEEGEEDGDVAPAR	_EHY(ph)S(ph)DSEEEEEEGEEDGDVAPAR_	3	923.318	260
D3YUJ3		Ccnyl1	0.98291	1	S	0.000361356	S(0.017)LS(0.983)ADNFIGIQR	_SLS(ph)ADNFIGIQR_	2	700.832	352
Q9R1V6	Disintegrin and metalloproteinase domain-containing protein 22	Adam22	0.5	1	S	0.000171484	S(0.5)NS(0.5)WQGNMGGNKK	_S(ph)NSWQGNM(ox)GGNKK_	2	752.306	830
Q9R1V6	Disintegrin and metalloproteinase domain-containing protein 22	Adam22	0.896827	1	S	0.000171484	S(0.103)NS(0.897)WQGNMGGNK	_SNS(ph)WQGNMGGNK_	2	680.261	832
D3YUP9		Adam22	0.994953	3;4	S	1.62757e-18	TLSPAKS(0.995)PS(0.167)S(0.792)S(0.766)T(0.225)GS(0.054)IAS(0.001)SR	_TLSPAKS(ph)PSS(ph)S(ph)TGSIASSR_	2	1030.92	857
D3YUP9		Adam22	0.497721	4	S	0.000756798	T(0.475)LS(0.525)PAKS(0.972)PS(0.498)S(0.466)S(0.435)T(0.46)GS(0.153)IAS(0.008)S(0.008)R	_TLS(ph)PAKS(ph)PS(ph)S(ph)STGSIASSR_	2	1070.9	859
D3YUP9		Adam22	0.973199	2;3;4	S	1.62757e-18	SPS(0.027)S(0.973)S(0.976)T(0.022)GS(0.002)IASSR	_SPSS(ph)S(ph)TGSIASSR_	2	692.263	860
D3YUP9		Adam22	0.975941	2;3;4	S	1.62757e-18	SPS(0.027)S(0.973)S(0.976)T(0.022)GS(0.002)IASSR	_SPSS(ph)S(ph)TGSIASSR_	2	692.263	861
D3YUP9		Adam22	0.525375	4	S	0.000756798	T(0.475)LS(0.525)PAKS(0.972)PS(0.498)S(0.466)S(0.435)T(0.46)GS(0.153)IAS(0.008)S(0.008)R	_TLS(ph)PAKS(ph)PS(ph)S(ph)STGSIASSR_	2	1070.9	853
D3YUQ5	RUN domain-containing protein 3B	Rundc3b	0.478256		S	0.00781648	FEQS(0.36)S(0.36)DS(0.324)IS(0.478)S(0.478)DEEELR	_FEQSSDSIS(ph)S(ph)DEEELR_	2	1009.37	216
D3YUQ5	RUN domain-containing protein 3B	Rundc3b	0.478256		S	0.00781648	FEQS(0.36)S(0.36)DS(0.324)IS(0.478)S(0.478)DEEELR	_FEQSSDSIS(ph)S(ph)DEEELR_	2	1009.37	217
F6ZFU0	Elongation factor 1-delta	Eef1d	0.999976	1	S	1.67374e-09	ATAPQTQHVS(1)PMR	_ATAPQTQHVS(ph)PM(ox)R_	2	760.34	404
F6ZFU0	Elongation factor 1-delta	Eef1d	1	1	S	1.59416e-17	GATPAEDDEDKDIDLFGS(1)DEEEEDKEAAR	_GATPAEDDEDKDIDLFGS(ph)DEEEEDKEAAR_	3	1092.78	433
D3YUV1	Nuclear receptor-binding protein	Nrbp1	0.999949	1	S	8.25216e-14	S(1)EGESQTVVSSGSDPK	_(ac)S(ph)EGESQTVVSSGSDPK_	2	858.354	2
Q9R1R2	Tripartite motif-containing protein 3	Trim3	1	1	S	1.19592e-07	REDS(1)PGPEVQPMDK	_REDS(ph)PGPEVQPM(ox)DK_	2	840.85	7
D3YVE8	Solute carrier family 35 member G2	Slc35g2	0.999996	1	S	0.000220437	REDYQEILDS(1)PIK	_REDYQEILDS(ph)PIK_	2	843.393	409
H3BIV5	A-kinase anchor protein 5	Akap5	0.999687	2	S	9.77057e-07	AS(1)LLES(0.002)S(0.041)AAGS(0.957)PR	_AS(ph)LLESSAAGS(ph)PR_	2	703.292	249
H3BIV5	A-kinase anchor protein 5	Akap5	0.999963	1;2	S	1.20983e-09	ASLLESSAAGS(1)PR	_ASLLESSAAGS(ph)PR_	2	663.308	258
H3BIV5	A-kinase anchor protein 5	Akap5	1	1	S	1.51893e-08	DEKGPVAAS(1)PQKER	_DEKGPVAAS(ph)PQKER_	3	531.254	29
Q64213	Splicing factor 1	Sf1	0.95963	2	S	8.7862e-05	TGDLGIPPNPEDRS(0.96)PS(0.937)PEPIY(0.046)NS(0.057)EGK	_TGDLGIPPNPEDRS(ph)PS(ph)PEPIYNSEGK_	3	976.09	80
Q64213	Splicing factor 1	Sf1	0.937218	2	S	8.7862e-05	TGDLGIPPNPEDRS(0.96)PS(0.937)PEPIY(0.046)NS(0.057)EGK	_TGDLGIPPNPEDRS(ph)PS(ph)PEPIYNSEGK_	3	976.09	82
K3W4S4	C-Jun-amino-terminal kinase-interacting protein 3	Mapk8ip3	0.814699	1	S	0.000672633	T(0.024)GS(0.16)S(0.815)PT(0.001)QGIVNK	_TGSS(ph)PTQGIVNK_	2	634.798	374
D3YWN7	Ensconsin	Mtap7	0.994754	1	S	0.00203904	LSSS(0.001)S(0.001)AT(0.003)LLNS(0.995)PDR	_LSSSSATLLNS(ph)PDR_	2	764.356	209
E9PX52	Arf-GAP with SH3 domain, ANK repeat and PH domain-containing protein 2	Asap2	1	1	S	1.84952e-41	LLHEDLDES(1)DDDVDEK	_LLHEDLDES(ph)DDDVDEK_	3	656.265	701
E9Q652	Regulator of G-protein signaling 12	Rgs12	0.483167		S	0.0131018	TLPDS(0.007)QQVPS(0.483)S(0.483)PAS(0.027)K	_TLPDSQQVPS(ph)SPASK_	2	811.377	849
E9Q652	Regulator of G-protein signaling 12	Rgs12	0.483167		S	0.0131018	TLPDS(0.007)QQVPS(0.483)S(0.483)PAS(0.027)K	_TLPDSQQVPS(ph)SPASK_	2	811.377	850
D3YXJ0		Dgkh	0.99654	3	S	1.48614e-43	AGAGSQHHPQGVAGGAVAGASAVS(0.001)PT(0.01)AAGPGEDS(0.997)S(0.997)DS(0.997)EAEQEGPQK	_AGAGSQHHPQGVAGGAVAGASAVSPTAAGPGEDS(ph)S(ph)DS(ph)EAEQEGPQK_	4	1113.71	35
D3YXJ0		Dgkh	0.99654	3	S	1.48614e-43	AGAGSQHHPQGVAGGAVAGASAVS(0.001)PT(0.01)AAGPGEDS(0.997)S(0.997)DS(0.997)EAEQEGPQK	_AGAGSQHHPQGVAGGAVAGASAVSPTAAGPGEDS(ph)S(ph)DS(ph)EAEQEGPQK_	4	1113.71	36
D3YXJ0		Dgkh	0.99654	3	S	1.48614e-43	AGAGSQHHPQGVAGGAVAGASAVS(0.001)PT(0.01)AAGPGEDS(0.997)S(0.997)DS(0.997)EAEQEGPQK	_AGAGSQHHPQGVAGGAVAGASAVSPTAAGPGEDS(ph)S(ph)DS(ph)EAEQEGPQK_	4	1113.71	38
Q80YR5	Scaffold attachment factor B2	Safb2	1	1	S	1.33209e-38	APTAALS(1)PEPQDSK	_APTAALS(ph)PEPQDSK_	2	746.34	387
D3YXR8	RIMS-binding protein 2	Rimbp2	0.993501	1;3	S	5.65276e-06	DHLS(0.994)PDFY(0.006)DESETDPGAEELPAR	_DHLS(ph)PDFYDESETDPGAEELPAR_	3	890.701	859
D3YXR8	RIMS-binding protein 2	Rimbp2	0.69611	3	S	0.00680854	DHLS(0.938)PDFY(0.67)DES(0.696)ET(0.696)DPGAEELPAR	_DHLS(ph)PDFYDES(ph)ET(ph)DPGAEELPAR_	3	944.012	866
Q91YS4		Klc2	1	1	S	5.17734e-19	KLDEDAS(1)PNEEK	_KLDEDAS(ph)PNEEK_	2	727.806	151
F8SLQ3	PEX5-related protein	Pex5l	0.999994	1	S	0.0037596	KGS(1)PGLTR	_KGS(ph)PGLTR_	2	448.223	426
F8SLQ3	PEX5-related protein	Pex5l	1	1	S	0.000485099	NHS(1)LEEEFER	_NHS(ph)LEEEFER_	2	685.275	250
Q8R001	Microtubule-associated protein RP/EB family member 2	Mapre2	0.856986	1	S	3.73087e-06	SHHANS(0.857)PT(0.143)AGAAK	_SHHANS(ph)PTAGAAK_	2	664.791	199
Q8VCE0	Sodium/potassium-transporting ATPase subunit alpha-2	Atp1a2	0.998617	1	S	1.30306e-05	QGAIVAVT(0.001)GDGVNDS(0.999)PALK	_QGAIVAVTGDGVNDS(ph)PALK_	2	946.462	712
Q8VCE0	Sodium/potassium-transporting ATPase subunit alpha-2	Atp1a2	0.833591	1	S	7.45789e-18	VDNSSLT(0.162)GES(0.834)EPQT(0.004)R	_VDNSSLTGES(ph)EPQTR_	2	850.362	212
E9Q4K0	Actin-binding LIM protein 2	Ablim2	0.451601		S	7.11871e-10	T(0.246)S(0.301)S(0.452)ES(0.002)IVSVPAS(0.333)S(0.133)T(0.221)S(0.178)GS(0.115)PS(0.02)R	_TSS(ph)ESIVSVPAS(ph)STSGSPSR_	2	1041.93	299
E9Q4K0	Actin-binding LIM protein 2	Ablim2	0.257955		S	1.38508e-08	T(0.149)S(0.17)S(0.195)ES(0.258)IVS(0.224)VPAS(0.39)S(0.391)T(0.323)S(0.272)GS(0.533)PS(0.094)R	_TSSES(ph)IVSVPAS(ph)STSGS(ph)PSR_	2	1081.92	301
E9Q4K0	Actin-binding LIM protein 2	Ablim2	0.390068		S	7.11871e-10	T(0.149)S(0.17)S(0.195)ES(0.258)IVS(0.224)VPAS(0.39)S(0.391)T(0.323)S(0.272)GS(0.533)PS(0.094)R	_TSSES(ph)IVSVPAS(ph)STSGS(ph)PSR_	2	1081.92	308
E9Q4K0	Actin-binding LIM protein 2	Ablim2	0.391101		S	1.16298e-13	T(0.149)S(0.17)S(0.195)ES(0.258)IVS(0.224)VPAS(0.39)S(0.391)T(0.323)S(0.272)GS(0.533)PS(0.094)R	_TSSES(ph)IVSVPAS(ph)STSGS(ph)PSR_	2	1081.92	309
E9Q4K0	Actin-binding LIM protein 2	Ablim2	0.532621	3	S	1.38508e-08	T(0.149)S(0.17)S(0.195)ES(0.258)IVS(0.224)VPAS(0.39)S(0.391)T(0.323)S(0.272)GS(0.533)PS(0.094)R	_TSSES(ph)IVSVPAS(ph)STSGS(ph)PSR_	2	1081.92	313
E9Q4K0	Actin-binding LIM protein 2	Ablim2	0.731721	2;3;4	S	7.97234e-20	T(0.688)S(0.732)S(0.578)PS(0.522)S(0.475)AGS(0.006)VSLGHYTPTSR	_T(ph)S(ph)SPS(ph)SAGSVSLGHYTPTSR_	2	1109.93	383
E9Q4K0	Actin-binding LIM protein 2	Ablim2	0.811715	2;3;4	S	1.05487e-08	T(0.57)S(0.57)S(0.812)PS(0.039)S(0.01)AGSVSLGHYTPTSR	_T(ph)SS(ph)PSSAGSVSLGHYTPTSR_	2	1069.94	384
E9Q4K0	Actin-binding LIM protein 2	Ablim2	0.521703	3	S	7.97234e-20	T(0.688)S(0.732)S(0.578)PS(0.522)S(0.475)AGS(0.006)VSLGHYTPTSR	_T(ph)S(ph)SPS(ph)SAGSVSLGHYTPTSR_	2	1109.93	386
E9Q4K0	Actin-binding LIM protein 2	Ablim2	0.9017	3	S	0.000859104	T(0.551)S(0.586)S(0.684)PS(0.242)S(0.902)AGS(0.029)VS(0.007)LGHYTPTSR	_TS(ph)S(ph)PSS(ph)AGSVSLGHYTPTSR_	3	740.287	387
E9Q4K0	Actin-binding LIM protein 2	Ablim2	0.396692		S	0.00254148	T(0.641)S(0.664)S(0.665)PS(0.116)S(0.405)AGS(0.397)VS(0.124)LGHY(0.101)T(0.719)PT(0.134)S(0.034)R	_TS(ph)S(ph)PSS(ph)AGSVSLGHYT(ph)PTSR_	2	1149.91	390
Q9D0L8	mRNA cap guanine-N7 methyltransferase	Rnmt	0.999868	1	S	3.65385e-14	ASVASDPES(1)PPGGNEPAAASGQR	_ASVASDPES(ph)PPGGNEPAAASGQR_	2	1116.48	15
Q9D0L8	mRNA cap guanine-N7 methyltransferase	Rnmt	0.970603	1	S	4.97407e-47	EFGEDLVEQNSSYVQDS(0.971)PS(0.029)K	_EFGEDLVEQNSSYVQDS(ph)PSK_	2	1169.49	64
D3YYY8		Arhgef26	1	1	S	4.97467e-07	ALDIDS(1)DEEPEAK	_ALDIDS(ph)DEEPEAK_	2	756.311	390
F6ZGR6		D430041D05Rik	0.345749		S	0.00345208	GHS(0.346)ET(0.193)S(0.212)T(0.234)LS(0.41)S(0.627)QPS(0.978)IDEVR	_GHS(ph)ETSTLS(ph)SQPS(ph)IDEVR_	2	1085.41	1365
F6ZGR6		D430041D05Rik	0.56865	2	S	0.000752225	GHS(0.002)ET(0.022)S(0.076)T(0.086)LS(0.569)S(0.421)QPS(0.824)IDEVR	_GHSETSTLS(ph)SQPS(ph)IDEVR_	2	1045.43	1371
F6ZGR6		D430041D05Rik	0.977857	2;3	S	0.000752225	GHS(0.346)ET(0.193)S(0.212)T(0.234)LS(0.41)S(0.627)QPS(0.978)IDEVR	_GHS(ph)ETSTLS(ph)SQPS(ph)IDEVR_	2	1085.41	1375
F6ZGR6		D430041D05Rik	1	1;2	S	2.39914e-37	NVT(1)AS(1)DEEEGAGLFDSAGK	_NVT(ph)AS(ph)DEEEGAGLFDSAGK_	2	1028.89	1163
F6ZGR6		D430041D05Rik	0.999995	2	S	0.000147998	NVT(0.142)AS(0.858)DEEEGAGLFDS(1)AGK	_NVTAS(ph)DEEEGAGLFDS(ph)AGK_	2	1028.89	1174
F6ZGR6		D430041D05Rik	0.532141	2	S	9.11264e-10	QS(0.532)LNS(0.532)PS(0.936)PGETEMDLLVTR	_QS(ph)LNSPS(ph)PGETEMDLLVTR_	2	1117.48	1305
F6ZGR6		D430041D05Rik	0.532199	2	S	9.11264e-10	QS(0.532)LNS(0.532)PS(0.936)PGETEMDLLVTR	_QS(ph)LNSPS(ph)PGETEMDLLVTR_	2	1117.48	1308
F6ZGR6		D430041D05Rik	0.935527	2	S	9.11264e-10	QS(0.532)LNS(0.532)PS(0.936)PGETEMDLLVTR	_QS(ph)LNSPS(ph)PGETEMDLLVTR_	2	1117.48	1310
D3Z4J3	Unconventional myosin-Va	Myo5a	0.999985	1	S	1.97743e-09	AIS(1)PTSATSSGR	_AIS(ph)PTSATSSGR_	2	607.774	600
D3YZI9		Pgbd5	0.931902	1	S	6.99068e-09	ELLGLEDS(0.068)S(0.932)PAH	_ELLGLEDSS(ph)PAH_	2	674.295	520
D3YZU1	SH3 and multiple ankyrin repeat domains protein 1	Shank1	1	1	S	0.000116858	EQDVVPFQES(1)PK	_EQDVVPFQES(ph)PK_	2	741.829	413
Q8K400	Syntaxin-binding protein 5	Stxbp5	0.626679	3	S	3.42312e-09	S(0.118)RS(0.401)S(0.627)S(0.838)VT(0.166)S(0.844)IDKES(0.006)R	_SRSS(ph)S(ph)VTS(ph)IDKESR_	2	889.842	782
Q8K400	Syntaxin-binding protein 5	Stxbp5	0.982501	1;2;3	S	1.1881e-09	S(0.008)S(0.01)S(0.983)VT(0.003)S(0.997)IDKESR	_SSS(ph)VTS(ph)IDKESR_	2	728.292	783
Q8K400	Syntaxin-binding protein 5	Stxbp5	0.996781	2;3	S	1.1881e-09	S(0.008)S(0.01)S(0.983)VT(0.003)S(0.997)IDKESR	_SSS(ph)VTS(ph)IDKESR_	2	728.292	786
D3Z0M6	Cytoplasmic dynein 1 intermediate chain 1	Dync1i1	1	1	S	4.23284e-11	ANRADS(1)EEEGAVELAA	_ANRADS(ph)EEEGAVELAA_	2	856.362	635
D3Z0M6	Cytoplasmic dynein 1 intermediate chain 1	Dync1i1	0.953935	1	S	5.03151e-11	ETQTPLAT(0.046)HQS(0.954)EEDEEDEEMVEPK	_ETQTPLATHQS(ph)EEDEEDEEMVEPK_	3	961.058	179
D3Z0M9		Ddx23	0.510484	2	S	0.027919	KRS(0.51)S(0.51)LS(0.979)PGR	_KRS(ph)SLS(ph)PGR_	2	574.255	105
D3Z0M9		Ddx23	0.510484	2	S	0.027919	KRS(0.51)S(0.51)LS(0.979)PGR	_KRS(ph)SLS(ph)PGR_	2	574.255	106
D3Z0M9		Ddx23	0.979033	2	S	0.027919	KRS(0.51)S(0.51)LS(0.979)PGR	_KRS(ph)SLS(ph)PGR_	2	574.255	108
Q9ES28	Rho guanine nucleotide exchange factor 7	Arhgef7	0.999993	1	S	0.00184375	MS(1)GFIYQGK	_M(ox)S(ph)GFIYQGK_	2	563.736	497
Q9ET54	Palladin	Palld	1	3	S	0.00160985	S(1)RS(1)RDS(1)GDENEPIQER	_S(ph)RS(ph)RDS(ph)GDENEPIQER_	3	705.591	1141
Q9ET54	Palladin	Palld	1	3	S	0.00160985	S(1)RS(1)RDS(1)GDENEPIQER	_S(ph)RS(ph)RDS(ph)GDENEPIQER_	3	705.591	1143
Q9ET54	Palladin	Palld	1	3	S	0.00160985	S(1)RS(1)RDS(1)GDENEPIQER	_S(ph)RS(ph)RDS(ph)GDENEPIQER_	3	705.591	1146
P54227	Stathmin	Stmn1	1	1	S	6.09298e-14	ASGQAFELILS(1)PR	_ASGQAFELILS(ph)PR_	2	734.863	25
P54227	Stathmin	Stmn1	1	1	S	1.44741e-16	DLS(1)LEEIQKK	_DLS(ph)LEEIQKK_	2	641.818	46
P54227	Stathmin	Stmn1	1	1	S	2.36483e-15	SKESVPDFPLS(1)PPK	_SKESVPDFPLS(ph)PPK_	2	804.389	38
O54916	RalBP1-associated Eps domain-containing protein 1	Reps1	0.999988	4	S	2.2859e-15	PSAEQQEPVS(1)PVVS(1)PQQS(0.985)PPT(0.581)S(0.423)PHT(0.012)WR	_PSAEQQEPVS(ph)PVVS(ph)PQQS(ph)PPT(ph)SPHTWR_	3	1091.77	162
O54916	RalBP1-associated Eps domain-containing protein 1	Reps1	0.999966	3;4	S	2.2859e-15	PSAEQQEPVS(1)PVVS(1)PQQS(0.985)PPT(0.581)S(0.423)PHT(0.012)WR	_PSAEQQEPVS(ph)PVVS(ph)PQQS(ph)PPT(ph)SPHTWR_	3	1091.77	166
O54916	RalBP1-associated Eps domain-containing protein 1	Reps1	0.98483	2;3;4	S	2.2859e-15	PSAEQQEPVS(1)PVVS(1)PQQS(0.985)PPT(0.581)S(0.423)PHT(0.012)WR	_PSAEQQEPVS(ph)PVVS(ph)PQQS(ph)PPT(ph)SPHTWR_	3	1091.77	170
F8VQL9	Nuclear receptor corepressor 2	Ncor2	0.716181	3	S	0.0180985	GS(0.716)PVT(0.803)T(0.803)REPT(0.678)PR	_GS(ph)PVT(ph)T(ph)REPTPR_	2	769.296	1563
Q80SW1	Putative adenosylhomocysteinase 2	Ahcyl1	0.92207	2;4	S	3.20847e-07	SIS(0.001)QS(0.001)S(0.003)T(0.006)DS(0.021)Y(0.018)S(0.02)S(0.02)AAS(0.018)Y(0.018)T(0.028)DS(0.922)S(0.919)DDEVS(0.005)PR	_SISQSSTDSYSSAASYTDS(ph)S(ph)DDEVSPR_	2	1495.06	84
Q80SW1	Putative adenosylhomocysteinase 2	Ahcyl1	0.918691	2	S	3.20847e-07	SIS(0.001)QS(0.001)S(0.003)T(0.006)DS(0.021)Y(0.018)S(0.02)S(0.02)AAS(0.018)Y(0.018)T(0.028)DS(0.922)S(0.919)DDEVS(0.005)PR	_SISQSSTDSYSSAASYTDS(ph)S(ph)DDEVSPR_	2	1495.06	85
P23198	Chromobox protein homolog 3	Cbx3	0.950826	1	S	7.34771e-05	KS(0.023)LS(0.951)DS(0.023)ES(0.003)DDSK	_KSLS(ph)DSESDDSK_	2	689.274	95
Q9CQF4	Uncharacterized protein C6orf203 homolog	1700021F05Rik	0.99992	1	S	1.39593e-08	EADEEDS(1)DEETSYPER	_EADEEDS(ph)DEETSYPER_	2	990.847	106
Q9DCL8	Protein phosphatase inhibitor 2	Ppp1r2	1	2;3	S	4.98497e-86	EQES(1)S(1)GEEDNDLS(1)PEER	_EQES(ph)S(ph)GEEDNDLS(ph)PEER_	2	1095.35	122
Q9DCL8	Protein phosphatase inhibitor 2	Ppp1r2	1	2;3	S	4.98497e-86	EQES(1)S(1)GEEDNDLS(1)PEER	_EQES(ph)S(ph)GEEDNDLS(ph)PEER_	2	1095.35	123
Q9DCL8	Protein phosphatase inhibitor 2	Ppp1r2	1	3	S	6.97827e-37	T(0.002)REQES(0.998)S(1)GEEDNDLS(1)PEER	_TREQES(ph)S(ph)GEEDNDLS(ph)PEER_	2	1223.92	131
D3Z3B8		Dlg1	1	1;2	S	2.1475e-08	KGS(1)S(1)DELQAEPEPSR	_KGS(ph)S(ph)DELQAEPEPSR_	2	895.356	40
D3Z3B8		Dlg1	1	1;2	S	2.1475e-08	KGS(1)S(1)DELQAEPEPSR	_KGS(ph)S(ph)DELQAEPEPSR_	2	895.356	41
D3Z4V2	Pre-mRNA 3'-end-processing factor FIP1	Fip1l1	0.999885	2	S	4.36693e-10	DHS(1)PTPS(0.008)VFNS(0.992)DEER	_DHS(ph)PTPSVFNS(ph)DEER_	2	938.843	493
D3Z4V2	Pre-mRNA 3'-end-processing factor FIP1	Fip1l1	0.991691	2	S	4.36693e-10	DHS(1)PTPS(0.008)VFNS(0.992)DEER	_DHS(ph)PTPSVFNS(ph)DEER_	2	938.843	501
D3Z4V2	Pre-mRNA 3'-end-processing factor FIP1	Fip1l1	0.695137	3	S	0.000554825	VT(0.073)ET(0.755)EDDS(0.695)DS(0.695)DS(0.767)DDDEDDVHVT(0.015)IGDIK	_VTET(ph)EDDS(ph)DSDS(ph)DDDEDDVHVTIGDIK_	3	1069.37	84
D3Z4V2	Pre-mRNA 3'-end-processing factor FIP1	Fip1l1	0.694806	3	S	0.000554825	VT(0.073)ET(0.755)EDDS(0.695)DS(0.695)DS(0.767)DDDEDDVHVT(0.015)IGDIK	_VTET(ph)EDDS(ph)DSDS(ph)DDDEDDVHVTIGDIK_	3	1069.37	86
D3Z4V2	Pre-mRNA 3'-end-processing factor FIP1	Fip1l1	0.767333	3	S	0.000554825	VT(0.073)ET(0.755)EDDS(0.695)DS(0.695)DS(0.767)DDDEDDVHVT(0.015)IGDIK	_VTET(ph)EDDS(ph)DSDS(ph)DDDEDDVHVTIGDIK_	3	1069.37	88
P54285	Voltage-dependent L-type calcium channel subunit beta-3	Cacnb3	1	1	S	2.99969e-09	VEEHS(1)PLER	_VEEHS(ph)PLER_	2	588.258	393
E9PX29		Spnb4	0.598521	3	S	0.0125328	WGQT(0.008)LPT(0.599)T(0.599)S(0.599)S(0.598)T(0.598)DEGNPKR	_WGQTLPT(ph)T(ph)S(ph)STDEGNPKR_	2	1107.93	2540
E9PX29		Spnb4	0.598452	3	S	0.0125328	WGQT(0.008)LPT(0.599)T(0.599)S(0.599)S(0.598)T(0.598)DEGNPKR	_WGQTLPT(ph)T(ph)S(ph)STDEGNPKR_	2	1107.93	2541
D3Z4T9	Zinc finger Ran-binding domain-containing protein 2	Zranb2	0.999883	1	S	8.93449e-14	ENVEYIEREES(1)DGEYDEFGR	_ENVEYIEREES(ph)DGEYDEFGR_	3	849.006	130
D3Z4T9	Zinc finger Ran-binding domain-containing protein 2	Zranb2	1	1	S	4.11043e-19	EVEDKES(1)EGEEEDEDEDLSK	_EVEDKES(ph)EGEEEDEDEDLSK_	2	1210.46	163
D3Z4T9	Zinc finger Ran-binding domain-containing protein 2	Zranb2	0.995264	1	S	0.00291152	YNLDAS(0.995)EEEDS(0.004)NK	_YNLDAS(ph)EEEDSNK_	2	797.301	198
Q9D415	Disks large-associated protein 1	Dlgap1	1	2;3	S	6.60593e-29	AMGDEDS(1)GDS(0.998)DT(0.032)S(0.969)PKPSPK	_AMGDEDS(ph)GDS(ph)DTS(ph)PKPSPK_	2	1080.86	362
Q9D415	Disks large-associated protein 1	Dlgap1	0.998078	2;3	S	6.60593e-29	AMGDEDS(1)GDS(0.998)DT(0.032)S(0.969)PKPSPK	_AMGDEDS(ph)GDS(ph)DTS(ph)PKPSPK_	2	1080.86	365
Q9D415	Disks large-associated protein 1	Dlgap1	0.969464	3	S	6.60593e-29	AMGDEDS(1)GDS(0.998)DT(0.032)S(0.969)PKPSPK	_AMGDEDS(ph)GDS(ph)DTS(ph)PKPSPK_	2	1080.86	368
Q9D415	Disks large-associated protein 1	Dlgap1	0.999994	1	S	0.000310556	ERS(1)LESSQR	_ERS(ph)LESSQR_	2	586.259	947
O35205	Granzyme K	Gzmk	0.426509		S	5.38134e-09	FIPFS(0.185)RLQS(0.104)GS(0.427)AS(0.284)HDIMLIK	_FIPFSRLQSGS(ph)ASHDIMLIK_	2	1164.08	111
P0C7L0	WAS/WASL-interacting protein family member 3	Wipf3	0.999112	1	S	0.00355638	AQLVS(0.999)PPAPPT(0.001)K	_AQLVS(ph)PPAPPTK_	2	643.331	211
Q9D0L7	Armadillo repeat-containing protein 10	Armc10	0.999973	1	S	5.2962e-21	S(1)AEDLTDGSYDDILNAEQLKK	_S(ph)AEDLTDGSYDDILNAEQLKK_	3	802.363	43
D3Z656	Synaptojanin-1	Synj1	0.997688	1	S	1.26498e-58	TPGPPSS(0.002)QGS(0.998)PVDTQPAAQK	_TPGPPSSQGS(ph)PVDTQPAAQK_	2	1015.47	1124
P17183	Gamma-enolase	Eno2	0.935539	1	S	0.0344233	DGKY(0.009)DLDFKS(0.936)PADPS(0.055)R	_DGKYDLDFKS(ph)PADPSR_	2	945.917	263
D3Z6G3		Mapre3	0.451895		S	0.000921395	QGQDVAPPPNPVPQRT(0.452)S(0.452)PT(0.096)GPK	_QGQDVAPPPNPVPQRT(ph)SPTGPK_	3	783.385	147
Q3USQ2		Zfp467	0.942341	1	S	0.0216688	AEPAGS(0.058)VPGDHMKFHCS(0.942)LR	_AEPAGSVPGDHM(ox)KFHCS(ph)LR_	2	1067.96	96
D3Z7Q5	Programmed cell death protein 5	Pdcd5	1	1	S	3.51336e-09	KVMDS(1)DEDDADY	_KVMDS(ph)DEDDADY_	2	741.753	198
D3Z7W0	Iron-sulfur cluster assembly enzyme ISCU, mitochondrial	Iscu	1	2	S	0.000230674	AAS(1)ALLLRS(1)PR	_AAS(ph)ALLLRS(ph)PR_	2	657.82	15
D3Z7W0	Iron-sulfur cluster assembly enzyme ISCU, mitochondrial	Iscu	1	2	S	0.000230674	AAS(1)ALLLRS(1)PR	_AAS(ph)ALLLRS(ph)PR_	2	657.82	21
D3Z7W0	Iron-sulfur cluster assembly enzyme ISCU, mitochondrial	Iscu	1	1	S	0.0256184	ELS(1)APAR	_ELS(ph)APAR_	2	412.189	30
G5E896	Enhancer of mRNA-decapping protein 4	Edc4	0.997231	2	S	0.0412763	GS(0.997)PRT(0.501)S(0.501)PKLK	_GS(ph)PRT(ph)SPKLK_	2	615.786	919
G5E896	Enhancer of mRNA-decapping protein 4	Edc4	0.501384	2	S	0.0412763	GS(0.997)PRT(0.501)S(0.501)PKLK	_GS(ph)PRT(ph)SPKLK_	2	615.786	923
Q3UHD6	Sorting nexin-27	Snx27	0.999865	1	S	0.000456032	SES(1)GYGFNVR	_SES(ph)GYGFNVR_	2	598.243	49
O35526	Syntaxin-1A	Stx1a	1	1	S	3.3189e-135	TAKDS(1)DDDDDVTVTVDR	_TAKDS(ph)DDDDDVTVTVDR_	2	973.897	14
O35526	Syntaxin-1A	Stx1a	1	1	S	1.37385e-28	HSAILAS(1)PNPDEK	_HSAILAS(ph)PNPDEK_	2	729.835	64
Q9R0P4	Small acidic protein	Smap	0.53623	1	S	3.98744e-09	S(0.536)AS(0.464)PDDDLGSSNWEAADLGNEER	_S(ph)ASPDDDLGSSNWEAADLGNEER_	3	839.001	15
Q9R0P4	Small acidic protein	Smap	0.813662	1	S	1.28419e-15	S(0.186)AS(0.814)PDDDLGSSNWEAADLGNEER	_SAS(ph)PDDDLGSSNWEAADLGNEER_	2	1258	17
P70452	Syntaxin-4	Stx4	1	1	S	9.48115e-15	QGDNIS(1)DDEDEVR	_QGDNIS(ph)DDEDEVR_	2	786.297	15
D9HP81	Regulating synaptic membrane exocytosis protein 2	Rims2	0.804155	1	S	3.82956e-11	TGSVQT(0.195)S(0.804)PSSTPGTGR	_TGSVQTS(ph)PSSTPGTGR_	2	800.354	1137
D9HP81	Regulating synaptic membrane exocytosis protein 2	Rims2	0.991546	1	S	0.00103632	T(0.003)S(0.003)NHS(0.992)PPT(0.002)PR	_TSNHS(ph)PPTPR_	2	587.256	432
Q9CQ73		Pkp2	0.990944	2	S	0.0149287	LEIS(0.991)PDS(0.243)S(0.766)PER	_LEIS(ph)PDSS(ph)PER_	2	695.27	151
Q9CQ73		Pkp2	0.765876	2	S	0.0149287	LEIS(0.991)PDS(0.243)S(0.766)PER	_LEIS(ph)PDSS(ph)PER_	2	695.27	155
Q3UVL4	Protein fat-free homolog	Ffr	0.92976	1	S	1.75404e-07	AAAAAVGPGLGS(0.93)GPGDS(0.07)PEGPEADAPERR	_(ac)AAAAAVGPGLGS(ph)GPGDSPEGPEADAPERR_	3	927.754	13
Q3UVL4	Protein fat-free homolog	Ffr	0.865399	1	S	8.54603e-14	AAAAAVGPGLGS(0.135)GPGDS(0.865)PEGPEADAPER	_(ac)AAAAAVGPGLGSGPGDS(ph)PEGPEADAPER_	3	875.72	18
Q3YAB3		Kcnip2	0.999463	1	S	0.00108964	KES(0.999)LS(0.001)ESR	_KES(ph)LSESR_	2	508.226	9
P51859	Hepatoma-derived growth factor	Hdgf	1	1	S	2.54986e-08	RAGDVLEDS(1)PK	_RAGDVLEDS(ph)PK_	2	633.79	165
P51859	Hepatoma-derived growth factor	Hdgf	1	2	S	5.78464e-72	GSAEGS(1)S(1)DEEGKLVIDEPAK	_GSAEGS(ph)S(ph)DEEGKLVIDEPAK_	2	1089.45	132
P51859	Hepatoma-derived growth factor	Hdgf	1	2	S	5.78464e-72	GSAEGS(1)S(1)DEEGKLVIDEPAK	_GSAEGS(ph)S(ph)DEEGKLVIDEPAK_	2	1089.45	133
E0CXB9	Catenin alpha-2	Ctnna2	0.784818	1	S	3.66695e-78	QVQEAIAGISSAAQAT(0.04)S(0.785)PT(0.176)DEAK	_QVQEAIAGISSAAQATS(ph)PTDEAK_	2	1177.05	275
E0CXB9	Catenin alpha-2	Ctnna2	1	2;3;4	S	2.72726e-18	S(1)RT(1)S(1)VQT(1)EDDQLIAGQSAR	_S(ph)RT(ph)S(ph)VQT(ph)EDDQLIAGQSAR_	3	794.632	664
E0CXB9	Catenin alpha-2	Ctnna2	1	2;3;4	S	1.98818e-18	S(1)RT(1)S(1)VQT(1)EDDQLIAGQSAR	_S(ph)RT(ph)S(ph)VQT(ph)EDDQLIAGQSAR_	3	794.632	667
E0CXB9	Catenin alpha-2	Ctnna2	1	1	S	1.39883e-209	TPEELEDDS(1)DFEQEDYDVR	_TPEELEDDS(ph)DFEQEDYDVR_	2	1205.96	653
E0CXZ9	Voltage-gated potassium channel subunit beta-2	Kcnab2	0.945881	1	S	0.000417575	MYPES(0.001)T(0.003)T(0.05)GS(0.946)PAR	_(ac)M(ox)YPESTTGS(ph)PAR_	2	717.784	9
E9QLL2	Dynamin-3	Dnm3	0.999988	1	S	0.000296393	S(1)PPPSPTTQR	_S(ph)PPPSPTTQR_	2	574.261	763
F8VPX1	Ubiquitin carboxyl-terminal hydrolase	Usp7	0.997736	1	S	0.00330089	AGEQQLS(0.998)EPEDMEMEAGDT(0.002)DDPPR	_AGEQQLS(ph)EPEDM(ox)EM(ox)EAGDTDDPPR_	3	920.349	19
E9PUC5		Psd3	0.780608	1	S	0.00738365	IS(0.013)NS(0.781)S(0.189)EFS(0.017)AK	_ISNS(ph)SEFSAK_	2	575.245	44
E9PUC5	PH and SEC7 domain-containing protein 3	Psd3	0.629412	2;3	S	3.6163e-05	KS(0.629)HS(0.675)S(0.62)PS(0.075)LNPDAS(0.942)PVT(0.057)AK	_KS(ph)HS(ph)SPSLNPDAS(ph)PVTAK_	3	688.281	337
E9PUC5	PH and SEC7 domain-containing protein 3	Psd3	0.999907	2;3	S	1.23167e-154	SHS(1)S(0.997)PS(0.003)LNPDASPVTAK	_SHS(ph)S(ph)PSLNPDASPVTAK_	2	927.887	339
E9PUC5	PH and SEC7 domain-containing protein 3	Psd3	0.999934	2;3	S	1.23167e-154	S(0.001)HS(0.999)S(1)PSLNPDAS(1)PVTAK	_SHS(ph)S(ph)PSLNPDAS(ph)PVTAK_	2	967.87	340
E9PUC5	PH and SEC7 domain-containing protein 3	Psd3	0.999939	2;3	S	3.22808e-135	S(0.001)HS(0.999)S(1)PSLNPDAS(1)PVTAK	_SHS(ph)S(ph)PSLNPDAS(ph)PVTAK_	2	967.87	348
Q58A65	C-Jun-amino-terminal kinase-interacting protein 4	Spag9	0.961191	2	S	5.98205e-08	S(0.033)AS(0.961)QS(0.217)S(0.788)LDKLDQELK	_SAS(ph)QSS(ph)LDKLDQELK_	2	904.889	730
Q58A65	C-Jun-amino-terminal kinase-interacting protein 4	Spag9	0.787989	2	S	5.98205e-08	S(0.033)AS(0.961)QS(0.217)S(0.788)LDKLDQELK	_SAS(ph)QSS(ph)LDKLDQELK_	2	904.889	733
E9PUJ6	Probable E3 ubiquitin-protein ligase MYCBP2	Mycbp2	1	2	S	0.000845678	ALLS(1)S(1)PEGEEK	_ALLS(ph)S(ph)PEGEEK_	2	660.262	4002
E9PUJ6	Probable E3 ubiquitin-protein ligase MYCBP2	Mycbp2	1	2	S	0.000845678	ALLS(1)S(1)PEGEEK	_ALLS(ph)S(ph)PEGEEK_	2	660.262	4003
E9PUJ6	Probable E3 ubiquitin-protein ligase MYCBP2	Mycbp2	0.946606	3	S	0.0106311	NS(0.147)VQS(0.947)GES(0.947)DS(0.947)DEEEES(0.014)REPPIKLPK	_NSVQS(ph)GES(ph)DS(ph)DEEEESREPPIKLPK_	3	1009.4	178
E9PUJ6	Probable E3 ubiquitin-protein ligase MYCBP2	Mycbp2	0.946606	3	S	0.0106311	NS(0.147)VQS(0.947)GES(0.947)DS(0.947)DEEEES(0.014)REPPIKLPK	_NSVQS(ph)GES(ph)DS(ph)DEEEESREPPIKLPK_	3	1009.4	181
E9PUJ6	Probable E3 ubiquitin-protein ligase MYCBP2	Mycbp2	0.946606	3	S	0.0106311	NS(0.147)VQS(0.947)GES(0.947)DS(0.947)DEEEES(0.014)REPPIKLPK	_NSVQS(ph)GES(ph)DS(ph)DEEEESREPPIKLPK_	3	1009.4	183
E9PUL5	Proline-rich transmembrane protein 2	Prrt2	1	1	S	0.00380847	AHGGHPGS(1)PR	_AHGGHPGS(ph)PR_	2	526.725	244
E9PUL5	Proline-rich transmembrane protein 2	Prrt2	0.972413	1	S	0.00296376	AS(0.972)PS(0.027)PSPSEAR	_AS(ph)PSPSPSEAR_	2	583.248	98
E9PV14		Epb4.1l1	0.999999	2	S	3.13685e-07	ADS(1)S(1)DETDTSFAER	_ADS(ph)S(ph)DETDTSFAER_	2	845.779	737
E9PV14		Epb4.1l1	0.99999	2	S	3.13685e-07	ADS(1)S(1)DETDTSFAER	_ADS(ph)S(ph)DETDTSFAER_	2	845.779	738
Q9Z2H5	Band 4.1-like protein 1	Epb4.1l1	1	2	S	1.91935e-13	EDDAES(1)GGRRS(1)EAEEGEVR	_EDDAES(ph)GGRRS(ph)EAEEGEVR_	2	1119.42	461
Q9Z2H5	Band 4.1-like protein 1	Epb4.1l1	1	2	S	1.91935e-13	EDDAES(1)GGRRS(1)EAEEGEVR	_EDDAES(ph)GGRRS(ph)EAEEGEVR_	2	1119.42	466
Q9Z2H5	Band 4.1-like protein 1	Epb4.1l1	0.999973	2	S	3.49341e-08	LPSSPAS(1)PS(1)PK	_LPSSPAS(ph)PS(ph)PK_	2	614.257	544
Q9Z2H5	Band 4.1-like protein 1	Epb4.1l1	1	2	S	3.49341e-08	LPSSPAS(1)PS(1)PK	_LPSSPAS(ph)PS(ph)PK_	2	614.257	546
Q9Z2H5	Band 4.1-like protein 1	Epb4.1l1	1	1	S	0.000269043	LVS(1)PEPPPK	_LVS(ph)PEPPPK_	2	522.262	378
O35495	Cyclin-dependent kinase 14	Cdk14	0.999606	1	S	0.00184773	ADS(1)YEKLEK	_ADS(ph)YEKLEK_	2	581.755	134
O35495	Cyclin-dependent kinase 14	Cdk14	0.995663	2	S	3.72757e-05	RHS(0.996)S(0.026)PS(0.579)S(0.383)PT(0.014)S(0.002)PK	_RHS(ph)SPS(ph)SPTSPK_	2	714.289	119
O35495	Cyclin-dependent kinase 14	Cdk14	0.578687	2	S	3.72757e-05	RHS(0.996)S(0.026)PS(0.579)S(0.383)PT(0.014)S(0.002)PK	_RHS(ph)SPS(ph)SPTSPK_	2	714.289	122
E9PVP0	PCTP-like protein	Stard10	0.482068		S	0.000541779	AGGAGGEGS(0.41)DDDT(0.104)S(0.482)LT(0.004)	_AGGAGGEGSDDDTS(ph)LT_	2	745.27	362
E9PWE8	Dihydropyrimidinase-related protein 3	Dpysl3	0.867048	1	S	0.0112142	GS(0.867)PT(0.133)RPNPPVR	_GS(ph)PTRPNPPVR_	3	419.875	635
E9PWN0	Phosphatidate phosphatase LPIN2	Lpin2	0.850041	1	S	0.000660823	S(0.85)DS(0.15)ELEVKPSESLLR	_S(ph)DSELEVKPSESLLR_	2	884.922	281
E9PWP6		Rims1	1	2	S	0.0283223	VS(1)PPES(1)PR	_VS(ph)PPES(ph)PR_	2	514.696	443
E9PWP6		Rims1	1	2	S	0.0283223	VS(1)PPES(1)PR	_VS(ph)PPES(ph)PR_	2	514.696	447
Q8K1A6	Coiled-coil and C2 domain-containing protein 1A	Cc2d1a	0.999995	1	S	2.6174e-06	LANHDEGS(1)DDEEEETPKK	_LANHDEGS(ph)DDEEEETPKK_	3	708.286	435
E9PYD5	Transcription elongation factor A protein 1	Tcea1	0.935951	1	S	0.00133422	EPAIS(0.02)S(0.044)QNS(0.936)PEAR	_EPAISSQNS(ph)PEAR_	2	733.32	111
E9Q9C3	Afadin	Mllt4	1	1	S	1.08117e-07	SSPNVANQPPS(1)PGGK	_SSPNVANQPPS(ph)PGGK_	2	758.843	1189
E9PZ19		Igsf9b	0.954543	3	S	0.0176596	T(0.078)LRAPS(0.955)ES(0.984)S(0.984)DDQGQPAAK	_TLRAPS(ph)ES(ph)S(ph)DDQGQPAAK_	2	1049.4	794
E9PZ19		Igsf9b	0.984254	3	S	0.0176596	T(0.078)LRAPS(0.955)ES(0.984)S(0.984)DDQGQPAAK	_TLRAPS(ph)ES(ph)S(ph)DDQGQPAAK_	2	1049.4	796
E9PZ19		Igsf9b	0.98361	3	S	0.0176596	T(0.078)LRAPS(0.955)ES(0.984)S(0.984)DDQGQPAAK	_TLRAPS(ph)ES(ph)S(ph)DDQGQPAAK_	2	1049.4	797
E9PZA8	Synaptotagmin-7	Syt7	0.994515	2	S	1.09213e-05	Y(0.001)KNS(0.995)LET(0.005)VGT(0.06)PDS(0.94)GR	_YKNS(ph)LETVGTPDS(ph)GR_	2	892.369	52
E9PZA8	Synaptotagmin-7	Syt7	0.990975	1;2;3	S	2.13356e-07	Y(0.61)KNS(0.29)LET(0.167)VGT(0.942)PDS(0.991)GRGR	_Y(ph)KNSLETVGT(ph)PDS(ph)GRGR_	2	1038.91	61
E9PZM7		Scaf11	0.727424	2	S	3.75129e-08	ETVVES(0.003)QS(0.172)S(0.112)QS(0.727)PS(0.986)PK	_ETVVESQSSQS(ph)PS(ph)PK_	2	875.353	857
E9PZM7		Scaf11	0.986009	2	S	3.75129e-08	ETVVES(0.003)QS(0.172)S(0.112)QS(0.727)PS(0.986)PK	_ETVVESQSSQS(ph)PS(ph)PK_	2	875.353	859
Q7TPS5	Uncharacterized protein KIAA0528	Kiaa0528	0.885773	2;3	S	2.68976e-06	S(0.128)QS(0.886)ES(0.989)S(0.989)DEVT(0.009)ELDLSHGK	_SQS(ph)ES(ph)S(ph)DEVTELDLSHGK_	2	1094.39	659
Q7TPS5	Uncharacterized protein KIAA0528	Kiaa0528	0.988504	3	S	2.68976e-06	S(0.128)QS(0.886)ES(0.989)S(0.989)DEVT(0.009)ELDLSHGK	_SQS(ph)ES(ph)S(ph)DEVTELDLSHGK_	2	1094.39	661
Q7TPS5	Uncharacterized protein KIAA0528	Kiaa0528	0.988504	3	S	2.68976e-06	S(0.128)QS(0.886)ES(0.989)S(0.989)DEVT(0.009)ELDLSHGK	_SQS(ph)ES(ph)S(ph)DEVTELDLSHGK_	2	1094.39	662
E9QK41	Actin-binding LIM protein 1	Ablim1	0.994669	1	S	3.52565e-08	T(0.005)LS(0.995)PTPSAEGYQDVR	_TLS(ph)PTPSAEGYQDVR_	2	850.88	475
E9QK41	Actin-binding LIM protein 1	Ablim1	0.9746	2	S	0.00371884	T(0.018)LS(0.496)PT(0.496)PS(0.975)AEGY(0.015)QDVR	_TLS(ph)PTPS(ph)AEGYQDVR_	2	890.863	479
Q4KMM3	Oxidation resistance protein 1	Oxr1	0.998879	3	S	1.2763e-18	GQDNQDSSHQESSLQQEAGEDS(0.999)VS(0.965)S(0.97)GET(0.066)VELK	_GQDNQDSSHQESSLQQEAGEDS(ph)VS(ph)S(ph)GETVELK_	3	1215.8	460
Q4KMM3	Oxidation resistance protein 1	Oxr1	0.964759	3	S	1.2763e-18	GQDNQDSSHQESSLQQEAGEDS(0.999)VS(0.965)S(0.97)GET(0.066)VELK	_GQDNQDSSHQESSLQQEAGEDS(ph)VS(ph)S(ph)GETVELK_	3	1215.8	462
Q4KMM3	Oxidation resistance protein 1	Oxr1	0.970379	3	S	1.2763e-18	GQDNQDSSHQESSLQQEAGEDS(0.999)VS(0.965)S(0.97)GET(0.066)VELK	_GQDNQDSSHQESSLQQEAGEDS(ph)VS(ph)S(ph)GETVELK_	3	1215.8	463
Q4KMM3	Oxidation resistance protein 1	Oxr1	0.668571	4	S	9.15107e-06	S(0.669)T(0.692)EES(0.665)LS(0.96)EDAFT(0.015)ES(0.026)ELS(0.933)PIREELLS(0.022)S(0.02)EPR	_S(ph)T(ph)EESLS(ph)EDAFTESELS(ph)PIREELLSSEPR_	3	1196.47	330
Q4KMM3	Oxidation resistance protein 1	Oxr1	0.959583	4	S	9.15107e-06	S(0.669)T(0.692)EES(0.665)LS(0.96)EDAFT(0.015)ES(0.026)ELS(0.933)PIREELLS(0.022)S(0.02)EPR	_S(ph)T(ph)EESLS(ph)EDAFTESELS(ph)PIREELLSSEPR_	3	1196.47	336
Q4KMM3	Oxidation resistance protein 1	Oxr1	0.932587	4	S	9.15107e-06	S(0.669)T(0.692)EES(0.665)LS(0.96)EDAFT(0.015)ES(0.026)ELS(0.933)PIREELLS(0.022)S(0.02)EPR	_S(ph)T(ph)EESLS(ph)EDAFTESELS(ph)PIREELLSSEPR_	3	1196.47	346
Q4KMM3	Oxidation resistance protein 1	Oxr1	0.996334	2;3	S	4.1362e-24	VVS(0.996)S(0.982)T(0.023)S(0.999)EEEEAFTEK	_VVS(ph)S(ph)TS(ph)EEEEAFTEK_	2	956.333	201
Q4KMM3	Oxidation resistance protein 1	Oxr1	0.981729	2;3	S	4.1362e-24	VVS(0.996)S(0.982)T(0.023)S(0.999)EEEEAFTEK	_VVS(ph)S(ph)TS(ph)EEEEAFTEK_	2	956.333	202
Q4KMM3	Oxidation resistance protein 1	Oxr1	0.99935	1;2;3	S	4.1362e-24	VVS(0.996)S(0.982)T(0.023)S(0.999)EEEEAFTEK	_VVS(ph)S(ph)TS(ph)EEEEAFTEK_	2	956.333	204
E9Q0N0	Intersectin-1	Itsn1	0.5	1	S	0.000394652	LPEEPS(0.5)S(0.5)EDEQQPEKK	_LPEEPS(ph)SEDEQQPEKK_	2	975.422	334
E9Q0N0	Intersectin-1	Itsn1	0.909596	1	S	2.08996e-17	LPEEPS(0.09)S(0.91)EDEQQPEK	_LPEEPSS(ph)EDEQQPEK_	2	911.375	335
Q61699	Heat shock protein 105 kDa	Hsph1	1	1	S	0.00204871	IES(1)PKLER	_IES(ph)PKLER_	2	526.263	810
E9Q1G8	Septin-7	2015-09-07	1	1	S	0.0110543	S(1)PLAQMEEERR	_S(ph)PLAQM(ox)EEERR_	2	721.311	334
E9Q1U6	CBP80/20-dependent translation initiation factor	Ctif	1	1	S	0.000131807	S(1)QEIEELER	_S(ph)QEIEELER_	2	606.761	18
Q9QVP9	Protein-tyrosine kinase 2-beta	Ptk2b	0.999065	1	S	0.00746463	RNS(0.999)LPQIPT(0.001)LNLEAR	_RNS(ph)LPQIPTLNLEAR_	3	601.316	375
E9Q2L2	Disks large homolog 2	Dlg2	0.999947	1	S	0.00209924	YQDEDGPHDHS(1)LPR	_YQDEDGPHDHS(ph)LPR_	3	582.569	28
O35452		Tnxb	0.388196		S	0.00228297	RVGPLS(0.388)VS(0.388)AMT(0.388)APAPAT(0.835)EASK	_RVGPLS(ph)VSAMTAPAPAT(ph)EASK_	2	1101.01	1639
O35452		Tnxb	0.388196		S	0.00228297	RVGPLS(0.388)VS(0.388)AMT(0.388)APAPAT(0.835)EASK	_RVGPLS(ph)VSAMTAPAPAT(ph)EASK_	2	1101.01	1641
S4R1E7	BAI1-associated protein 3	Baiap3	0.5	1	S	0.0189602	S(0.5)GS(0.5)PAPAEPVDPNR	_S(ph)GSPAPAEPVDPNR_	2	737.322	76
S4R1E7	BAI1-associated protein 3	Baiap3	0.5	1	S	0.0189602	S(0.5)GS(0.5)PAPAEPVDPNR	_S(ph)GSPAPAEPVDPNR_	2	737.322	78
E9Q3L2		Pi4ka	0.999612	1	S	3.67455e-07	TSSVSSISQVS(1)PER	_TSSVSSISQVS(ph)PER_	2	772.354	207
E9Q3M9		2010300C02Rik	0.993124	1	S	0.000994235	DLS(0.993)PS(0.007)EGDVAPPK	_DLS(ph)PSEGDVAPPK_	2	696.308	612
E9Q3M9		2010300C02Rik	1	1	S	1.468e-28	DMS(1)PPEGDVAPPKK	_DM(ox)S(ph)PPEGDVAPPKK_	3	521.897	507
E9Q3M9		2010300C02Rik	0.998586	1	S	3.61593e-06	DMS(0.999)PS(0.001)EGDVAPPKK	_DM(ox)S(ph)PSEGDVAPPKK_	2	777.331	570
E9Q3M9		2010300C02Rik	0.918406	1	S	0.0180067	DMS(0.918)PS(0.082)KDNMAPPKR	_DM(ox)S(ph)PSKDNM(ox)APPKR_	3	562.572	465
E9Q3T0	60S acidic ribosomal protein P1	Gm10073	0.777814	1	S	0.000596356	KEES(0.222)EES(0.778)EDDMGFGLFD	_KEESEES(ph)EDDM(ox)GFGLFD_	2	1030.37	104
Q9QXS1	Plectin	Plec	1	1	S	0.000517745	AQLEPVAS(1)PAK	_AQLEPVAS(ph)PAK_	2	595.794	1443
Q9QXS1	Plectin	Plec	0.727854	1	S	0.0167671	ARNDES(0.223)QLS(0.728)PAT(0.049)R	_ARNDESQLS(ph)PATR_	2	762.844	728
Q9QXS1	Plectin	Plec	0.33251		S	0.000648615	S(0.333)S(0.333)S(0.333)VGS(0.002)SSSYPISSAGPR	_S(ph)SSVGSSSSYPISSAGPR_	2	896.891	4391
Q9QXS1	Plectin	Plec	0.33251		S	0.000648615	S(0.333)S(0.333)S(0.333)VGS(0.002)SSSYPISSAGPR	_S(ph)SSVGSSSSYPISSAGPR_	2	896.891	4392
Q9QXS1	Plectin	Plec	0.33251		S	0.000648615	S(0.333)S(0.333)S(0.333)VGS(0.002)SSSYPISSAGPR	_S(ph)SSVGSSSSYPISSAGPR_	2	896.891	4393
E9Q411		Nbas	0.998806	2	S	1.67432e-09	AGEEDEGEVDS(0.999)DS(0.975)DPET(0.02)S(0.007)AK	_AGEEDEGEVDS(ph)DS(ph)DPETSAK_	2	1113.88	472
E9Q411		Nbas	0.974604	2	S	1.67432e-09	AGEEDEGEVDS(0.999)DS(0.975)DPET(0.02)S(0.007)AK	_AGEEDEGEVDS(ph)DS(ph)DPETSAK_	2	1113.88	474
P70704	Probable phospholipid-transporting ATPase IA	Atp8a1	1	2;3	S	4.68623e-98	TDDVS(1)EKT(0.067)S(0.933)LADQEEVR	_TDDVS(ph)EKTS(ph)LADQEEVR_	2	1041.42	25
P70704	Probable phospholipid-transporting ATPase IA	Atp8a1	1	2;3	S	4.68623e-98	TDDVS(1)EKT(1)S(1)LADQEEVR	_TDDVS(ph)EKT(ph)S(ph)LADQEEVR_	2	1081.4	29
E9Q4Z6	Double zinc ribbon and ankyrin repeat-containing protein 1	6330439K17Rik	0.999884	1	S	0.0010328	FTQGLEDQLS(1)PPGNR	_FTQGLEDQLS(ph)PPGNR_	2	869.893	769
Q8C7M3	E3 ubiquitin-protein ligase TRIM9	Trim9	0.745904	1;2	S	2.86065e-05	NILVQT(0.006)PES(0.124)ES(0.746)PQS(0.124)R	_NILVQTPESES(ph)PQSR_	2	882.912	46
E9Q5C9		Nolc1	1	1	S	4.72975e-176	AAKES(1)EEEEEEEETEEK	_AAKES(ph)EEEEEEEETEEK_	2	1052.9	563
Q7TQH0	Ataxin-2-like protein	Atxn2l	0.826717	1	S	0.024428	EVDGLLT(0.016)S(0.053)DPMGS(0.827)PVS(0.053)S(0.053)K	_EVDGLLTSDPM(ox)GS(ph)PVSSK_	2	957.924	597
E9Q6J5		Bod1l	0.891953	2	S	0.00196749	Y(0.107)Y(0.107)S(0.892)DS(0.892)DDELT(0.003)VEQR	_YYS(ph)DS(ph)DDELTVEQR_	2	940.337	480
E9Q6J5		Bod1l	0.891953	2	S	0.00196749	Y(0.107)Y(0.107)S(0.892)DS(0.892)DDELT(0.003)VEQR	_YYS(ph)DS(ph)DDELTVEQR_	2	940.337	482
E9Q6P5		Ttc7b	0.993185	3	S	0.00128924	VEQALS(0.993)EVAS(0.897)S(0.897)LQS(0.109)S(0.105)APK	_VEQALS(ph)EVAS(ph)S(ph)LQSSAPK_	2	1035.93	673
E9Q6P5		Ttc7b	0.919092	2;3	S	8.73764e-14	VEQALSEVAS(0.919)S(0.919)LQS(0.08)S(0.082)APK	_VEQALSEVAS(ph)S(ph)LQSSAPK_	2	995.942	677
E9Q6P5		Ttc7b	0.919092	2;3	S	8.73764e-14	VEQALSEVAS(0.919)S(0.919)LQS(0.08)S(0.082)APK	_VEQALSEVAS(ph)S(ph)LQSSAPK_	2	995.942	678
E9Q912		Rap1gds1	0.923968	1	S	0.00513162	SVAQQAS(0.924)LT(0.076)EQR	_SVAQQAS(ph)LTEQR_	2	699.325	597
P51830	Adenylate cyclase type 9	Adcy9	0.984245	1;2	S	1.23324e-14	GQGT(0.016)AS(0.984)PGSVSDLAQTVK	_GQGTAS(ph)PGSVSDLAQTVK_	2	891.917	610
P51830	Adenylate cyclase type 9	Adcy9	0.976571	2	S	6.97895e-09	GQGT(0.117)AS(0.883)PGS(0.977)VS(0.023)DLAQTVK	_GQGTAS(ph)PGS(ph)VSDLAQTVK_	2	931.9	613
F8VQC1		Srp72	0.445639		S	0.00417562	AVS(0.446)S(0.446)PPT(0.365)S(0.365)PRPGS(0.142)AAT(0.142)IS(0.055)S(0.023)S(0.011)AS(0.005)NIVPPR	_AVS(ph)SPPT(ph)SPRPGSAATISSSASNIVPPR_	3	951.118	620
F8VQC1		Srp72	0.445639		S	0.00417562	AVS(0.446)S(0.446)PPT(0.365)S(0.365)PRPGS(0.142)AAT(0.142)IS(0.055)S(0.023)S(0.011)AS(0.005)NIVPPR	_AVS(ph)SPPT(ph)SPRPGSAATISSSASNIVPPR_	3	951.118	621
F8VQC1		Srp72	0.365499		S	0.00417562	AVS(0.446)S(0.446)PPT(0.365)S(0.365)PRPGS(0.142)AAT(0.142)IS(0.055)S(0.023)S(0.011)AS(0.005)NIVPPR	_AVS(ph)SPPT(ph)SPRPGSAATISSSASNIVPPR_	3	951.118	625
E9Q784		Zc3h13	1	1	S	0.0187956	EVS(1)PEVVR	_EVS(ph)PEVVR_	2	497.734	198
E9Q784		Zc3h13	0.722571	2	S	0.00396737	KRT(0.927)PS(0.224)PS(0.723)Y(0.127)QR	_KRT(ph)PSPS(ph)YQR_	2	690.297	357
Q8CD76	Kinesin light chain 1	Klc1	1	1;2	S	0.0253521	S(1)RES(1)LNMDVVK	_S(ph)RES(ph)LNMDVVK_	2	719.296	521
Q8CD76	Kinesin light chain 1	Klc1	1	2	S	0.0253521	S(1)RES(1)LNMDVVK	_S(ph)RES(ph)LNMDVVK_	2	719.296	524
Q3UXS0	Secretory carrier-associated membrane protein 3	Scamp3	0.999722	1	S	0.000329647	KLS(1)PTEPR	_KLS(ph)PTEPR_	2	504.25	79
F7DCH5	CLIP-associating protein 2	Clasp2	0.5	1	S	0.0133029	S(0.5)RS(0.5)DIDVNAAAGAK	_S(ph)RSDIDVNAAAGAK_	2	727.835	374
F7DCH5	CLIP-associating protein 2	Clasp2	0.5	1	S	0.0133029	S(0.5)RS(0.5)DIDVNAAAGAK	_S(ph)RSDIDVNAAAGAK_	2	727.835	376
E9Q8P8	Protein FAM131B	Fam131b	1	2	S	0.0136061	DLES(1)LS(1)PR	_DLES(ph)LS(ph)PR_	2	538.707	323
E9Q8P8	Protein FAM131B	Fam131b	1	1;2	S	0.00302975	DLES(1)LS(1)PR	_DLES(ph)LS(ph)PR_	2	538.707	325
E9Q8P8	Protein FAM131B	Fam131b	1	2	S	1.54574e-80	DTDAYS(1)DLS(1)DGEKEAR	_DTDAYS(ph)DLS(ph)DGEKEAR_	2	966.351	142
E9Q8P8	Protein FAM131B	Fam131b	1	1;2	S	7.21555e-98	DTDAYS(1)DLS(1)DGEKEAR	_DTDAYS(ph)DLS(ph)DGEKEAR_	2	966.351	145
E9Q8P8	Protein FAM131B	Fam131b	0.999943	1	S	1.07177e-35	KVSDVTSSGVQS(1)FDEEEGDANN	_KVSDVTSSGVQS(ph)FDEEEGDANN_	2	1197.48	350
E9Q8T1	Transforming acidic coiled-coil-containing protein 2	Tacc2	1	1	S	0.00059072	VQNS(1)PPVGR	_VQNS(ph)PPVGR_	2	517.245	2122
E9Q942	UPF0766 protein C6orf228 homolog		0.561669	3	S	9.32734e-09	ELVGDT(0.451)GS(0.562)QEGDNEQPS(0.867)GS(0.848)ET(0.271)EEDPSASPQK	_ELVGDTGS(ph)QEGDNEQPS(ph)GS(ph)ETEEDPSASPQK_	3	1148.76	50
E9Q942	UPF0766 protein C6orf228 homolog		0.902723	2;3	S	4.80873e-25	ELVGDTGSQEGDNEQPS(0.903)GS(0.903)ET(0.194)EEDPSASPQK	_ELVGDTGSQEGDNEQPS(ph)GS(ph)ETEEDPSASPQK_	3	1122.1	59
E9Q942	UPF0766 protein C6orf228 homolog		0.902742	2;3	S	4.80873e-25	ELVGDTGSQEGDNEQPS(0.903)GS(0.903)ET(0.194)EEDPSASPQK	_ELVGDTGSQEGDNEQPS(ph)GS(ph)ETEEDPSASPQK_	3	1122.1	61
E9Q942	UPF0766 protein C6orf228 homolog		0.922476	3	S	1.9667e-05	ELVGDT(0.144)GS(0.102)QEGDNEQPS(0.833)GS(0.74)ET(0.176)EEDPS(0.082)AS(0.922)PQK	_ELVGDTGSQEGDNEQPS(ph)GS(ph)ETEEDPSAS(ph)PQK_	3	1148.76	70
Q80TM6	R3H domain-containing protein 2	R3hdm2	0.364164		S	2.56164e-05	S(0.364)AS(0.318)T(0.318)DLGTADVVLGR	_S(ph)ASTDLGTADVVLGR_	2	771.364	921
S4R1P5	Dystonin	Dst	1	2	S	1.25354e-07	LLDPEDVDVS(1)S(1)PDEK	_LLDPEDVDVS(ph)S(ph)PDEK_	2	909.36	414
S4R1P5	Dystonin	Dst	1	2	S	1.25354e-07	LLDPEDVDVS(1)S(1)PDEK	_LLDPEDVDVS(ph)S(ph)PDEK_	2	909.36	415
Q7TQK5	Coiled-coil domain-containing protein 93	Ccdc93	0.997832	1	S	0.000631205	QSELS(0.002)AEES(0.998)PEK	_QSELSAEES(ph)PEK_	2	707.293	305
E9QAQ5	Glycogen synthase kinase-3 beta	Gsk3b	0.999996	1	S	6.40181e-10	IQAAAS(1)PPANATAASDTNAGDR	_IQAAAS(ph)PPANATAASDTNAGDR_	2	1075.48	402
Q7TPB0	Lipid phosphate phosphatase-related protein type 3	Lppr3	0.495554		S	0.0143259	S(0.009)VS(0.496)T(0.496)DELGPPGR	_SVS(ph)TDELGPPGR_	2	647.787	320
E9QK48		Eml2	0.467249		S	0.000788437	VGGYAT(0.008)S(0.058)PS(0.467)S(0.467)PK	_VGGYATSPS(ph)SPK_	2	615.774	153
E9QK48		Eml2	0.467249		S	0.000788437	VGGYAT(0.008)S(0.058)PS(0.467)S(0.467)PK	_VGGYATSPS(ph)SPK_	2	615.774	154
E9QK48		Eml2	0.999986	1	S	0.0334609	YLS(1)PER	_YLS(ph)PER_	2	422.684	170
E9QKC6	Tripartite motif-containing protein 2	Trim2	1	1;2	S	2.22491e-20	S(1)ADVS(1)PTTEGVKR	_S(ph)ADVS(ph)PTTEGVKR_	2	753.815	450
E9QKC6	Tripartite motif-containing protein 2	Trim2	0.999679	1;2	S	2.22491e-20	S(1)ADVS(1)PTTEGVKR	_S(ph)ADVS(ph)PTTEGVKR_	2	753.815	454
Q99NH0	Ankyrin repeat domain-containing protein 17	Ankrd17	0.697164	2	S	0.00546039	EHY(0.127)PVS(0.697)S(0.294)PS(0.294)S(0.294)PS(0.294)PPAQPGGVSR	_EHYPVS(ph)S(ph)PSSPSPPAQPGGVSR_	3	794.005	2037
Q99NH0	Ankyrin repeat domain-containing protein 17	Ankrd17	0.293829		S	0.00546039	EHY(0.127)PVS(0.697)S(0.294)PS(0.294)S(0.294)PS(0.294)PPAQPGGVSR	_EHYPVS(ph)S(ph)PSSPSPPAQPGGVSR_	3	794.005	2038
Q99NH0	Ankyrin repeat domain-containing protein 17	Ankrd17	0.293828		S	0.00546039	EHY(0.127)PVS(0.697)S(0.294)PS(0.294)S(0.294)PS(0.294)PPAQPGGVSR	_EHYPVS(ph)S(ph)PSSPSPPAQPGGVSR_	3	794.005	2040
Q99NH0	Ankyrin repeat domain-containing protein 17	Ankrd17	0.293828		S	0.00546039	EHY(0.127)PVS(0.697)S(0.294)PS(0.294)S(0.294)PS(0.294)PPAQPGGVSR	_EHYPVS(ph)S(ph)PSSPSPPAQPGGVSR_	3	794.005	2041
Q99NH0	Ankyrin repeat domain-containing protein 17	Ankrd17	0.293828		S	0.00546039	EHY(0.127)PVS(0.697)S(0.294)PS(0.294)S(0.294)PS(0.294)PPAQPGGVSR	_EHYPVS(ph)S(ph)PSSPSPPAQPGGVSR_	3	794.005	2043
O35927	Catenin delta-2	Ctnnd2	1	1;2	S	1.01983e-31	GGS(1)PLTTTQGGS(0.795)PT(0.205)K	_GGS(ph)PLTTTQGGS(ph)PTK_	2	774.821	264
O35927	Catenin delta-2	Ctnnd2	0.799203	1;2	S	1.01983e-31	GGSPLTT(0.001)T(0.017)QGGS(0.799)PT(0.183)K	_GGSPLTTTQGGS(ph)PTK_	2	734.838	273
O35927	Catenin delta-2	Ctnnd2	0.997805	2	S	0.00281887	S(0.998)PS(0.998)IDS(0.004)IQKDPR	_S(ph)PS(ph)IDSIQKDPR_	2	751.818	529
O35927	Catenin delta-2	Ctnnd2	0.997805	1;2	S	0.000304883	S(0.998)PS(0.998)IDS(0.004)IQKDPR	_S(ph)PS(ph)IDSIQKDPR_	2	751.818	531
O35927	Catenin delta-2	Ctnnd2	0.952117	2	S	9.70693e-05	T(0.001)PS(0.047)IS(0.952)PVRVS(1)PNNR	_TPSIS(ph)PVRVS(ph)PNNR_	2	842.384	1082
O35927	Catenin delta-2	Ctnnd2	0.999939	2	S	9.70693e-05	T(0.001)PS(0.047)IS(0.952)PVRVS(1)PNNR	_TPSIS(ph)PVRVS(ph)PNNR_	2	842.384	1087
E9QKI4	Proline-rich AKT1 substrate 1	Akt1s1	0.983951	3	S	1.47015e-05	T(0.032)EARS(0.984)S(0.984)DEENGPPS(0.301)S(0.699)PDLDR	_TEARS(ph)S(ph)DEENGPPSS(ph)PDLDR_	3	800.287	274
E9QKI4	Proline-rich AKT1 substrate 1	Akt1s1	0.983952	2;3	S	1.17187e-17	T(0.032)EARS(0.984)S(0.984)DEENGPPS(0.301)S(0.699)PDLDR	_TEARS(ph)S(ph)DEENGPPSS(ph)PDLDR_	3	800.287	275
E9QKI4	Proline-rich AKT1 substrate 1	Akt1s1	0.75832	2;3	S	1.17187e-17	S(0.447)S(0.553)DEENGPPS(0.242)S(0.758)PDLDR	_SS(ph)DEENGPPSS(ph)PDLDR_	2	931.33	284
E9QKT1		Ube3a	0.999975	1	S	9.48037e-07	S(1)PGESQSEDIEASR	_S(ph)PGESQSEDIEASR_	2	786.315	8
E9QMN5	Transcriptional repressor p66 alpha	Gatad2a	0.995748	3	S	0.0231894	RPPS(0.996)PDVIVLS(0.533)DS(0.533)EQPS(0.748)S(0.191)PR	_RPPS(ph)PDVIVLS(ph)DSEQPS(ph)SPR_	3	801.673	96
E9QMN5	Transcriptional repressor p66 alpha	Gatad2a	0.532575	3	S	0.0231894	RPPS(0.996)PDVIVLS(0.533)DS(0.533)EQPS(0.748)S(0.191)PR	_RPPS(ph)PDVIVLS(ph)DSEQPS(ph)SPR_	3	801.673	103
E9QMN5	Transcriptional repressor p66 alpha	Gatad2a	0.532575	3	S	0.0231894	RPPS(0.996)PDVIVLS(0.533)DS(0.533)EQPS(0.748)S(0.191)PR	_RPPS(ph)PDVIVLS(ph)DSEQPS(ph)SPR_	3	801.673	105
E9QMN5	Transcriptional repressor p66 alpha	Gatad2a	0.748439	3	S	0.0231894	RPPS(0.996)PDVIVLS(0.533)DS(0.533)EQPS(0.748)S(0.191)PR	_RPPS(ph)PDVIVLS(ph)DSEQPS(ph)SPR_	3	801.673	109
F8VPQ4	SLIT-ROBO Rho GTPase-activating protein 3	Srgap3	1	3	S	3.07136e-05	ADS(1)EAS(1)S(1)GPLLDDK	_ADS(ph)EAS(ph)S(ph)GPLLDDK_	2	822.778	817
F8VPQ4	SLIT-ROBO Rho GTPase-activating protein 3	Srgap3	1	3	S	3.07136e-05	ADS(1)EAS(1)S(1)GPLLDDK	_ADS(ph)EAS(ph)S(ph)GPLLDDK_	2	822.778	820
F8VPQ4	SLIT-ROBO Rho GTPase-activating protein 3	Srgap3	1	3	S	3.07136e-05	ADS(1)EAS(1)S(1)GPLLDDK	_ADS(ph)EAS(ph)S(ph)GPLLDDK_	2	822.778	821
E9QNF7	Contactin-associated protein-like 2	Cntnap2	1	2	S	1.51738e-09	GAES(1)AES(1)ADAAIMNNDPNFTETIDESKK	_GAES(ph)AES(ph)ADAAIMNNDPNFTETIDESKK_	3	1039.09	1304
E9QNF7	Contactin-associated protein-like 2	Cntnap2	0.999999	2	S	1.51738e-09	GAES(1)AES(1)ADAAIMNNDPNFTETIDESKK	_GAES(ph)AES(ph)ADAAIMNNDPNFTETIDESKK_	3	1039.09	1307
E9QNH7	Acyl-CoA-binding domain-containing protein 5	Acbd5	0.993786	4	S	0.00623699	AES(0.994)S(0.994)DS(0.994)GAES(0.992)EEEEAQEELKGAEQS(0.015)GS(0.012)DDKK	_AES(ph)S(ph)DS(ph)GAES(ph)EEEEAQEELKGAEQSGSDDKK_	3	1192.75	184
E9QNH7	Acyl-CoA-binding domain-containing protein 5	Acbd5	0.993786	4	S	0.00623699	AES(0.994)S(0.994)DS(0.994)GAES(0.992)EEEEAQEELKGAEQS(0.015)GS(0.012)DDKK	_AES(ph)S(ph)DS(ph)GAES(ph)EEEEAQEELKGAEQSGSDDKK_	3	1192.75	185
E9QNH7	Acyl-CoA-binding domain-containing protein 5	Acbd5	0.993687	4	S	0.00623699	AES(0.994)S(0.994)DS(0.994)GAES(0.992)EEEEAQEELKGAEQS(0.015)GS(0.012)DDKK	_AES(ph)S(ph)DS(ph)GAES(ph)EEEEAQEELKGAEQSGSDDKK_	3	1192.75	187
E9QNH7	Acyl-CoA-binding domain-containing protein 5	Acbd5	0.992064	4	S	0.00623699	AES(0.994)S(0.994)DS(0.994)GAES(0.992)EEEEAQEELKGAEQS(0.015)GS(0.012)DDKK	_AES(ph)S(ph)DS(ph)GAES(ph)EEEEAQEELKGAEQSGSDDKK_	3	1192.75	191
E9QP00	Transformer-2 protein homolog alpha	Tra2a	1	2	S	1.41062e-09	RS(1)PS(1)PYYSR	_RS(ph)PS(ph)PYYSR_	2	636.744	260
E9QP00	Transformer-2 protein homolog alpha	Tra2a	0.999938	2	S	1.41062e-09	RS(1)PS(1)PYYSR	_RS(ph)PS(ph)PYYSR_	2	636.744	262
E9QP00	Transformer-2 protein homolog alpha	Tra2a	1	1;2	S	4.05302e-38	S(1)DVEENNFEGRES(1)R	_(ac)S(ph)DVEENNFEGRES(ph)R_	2	935.338	2
E9QP00	Transformer-2 protein homolog alpha	Tra2a	1	2	S	4.05302e-38	S(1)DVEENNFEGRES(1)R	_(ac)S(ph)DVEENNFEGRES(ph)R_	2	935.338	14
E9QP00	Transformer-2 protein homolog alpha	Tra2a	0.999959	4	S	0.00128111	S(1)RS(0.99)RS(0.742)Y(0.781)T(0.486)PEY(0.001)R	_S(ph)RS(ph)RS(ph)Y(ph)TPEYR_	2	861.28	80
E9QP00	Transformer-2 protein homolog alpha	Tra2a	0.999999	3;4	S	8.89895e-08	S(1)RS(1)YT(1)PEYR	_S(ph)RS(ph)YT(ph)PEYR_	2	699.73	82
E9QP00	Transformer-2 protein homolog alpha	Tra2a	0.999992	3;4	S	8.89895e-08	S(1)RS(1)YT(1)PEYR	_S(ph)RS(ph)YT(ph)PEYR_	2	699.73	84
E9QP54	Jouberin	Ahi1	0.811842	1	S	0.0014606	GKTPT(0.036)ADDS(0.812)DDS(0.152)REK	_GKTPTADDS(ph)DDSREK_	2	851.352	26
F2Z3U3		Raph1	1	2	S	1.85433e-10	MEQLS(1)DEEIDHGAEEDS(1)DKEDQDLDK	_(ac)M(ox)EQLS(ph)DEEIDHGAEEDS(ph)DKEDQDLDK_	3	1080.07	5
F2Z3U3		Raph1	1	2	S	1.85433e-10	MEQLS(1)DEEIDHGAEEDS(1)DKEDQDLDK	_(ac)M(ox)EQLS(ph)DEEIDHGAEEDS(ph)DKEDQDLDK_	3	1080.07	17
F2Z3U3		Raph1	0.932454	1	S	0.00636381	SLPAS(0.016)GT(0.051)PQS(0.932)PPAVK	_SLPASGTPQS(ph)PPAVK_	2	758.874	899
Q3UDE2	Tubulin--tyrosine ligase-like protein 12	Ttll12	0.999715	1	S	6.58498e-05	MEIQSGPQPGS(1)PGR	_(ac)M(ox)EIQSGPQPGS(ph)PGR_	2	789.835	11
Q60932	Voltage-dependent anion-selective channel protein 1	Vdac1	0.588183	1	S	0.00330643	LTFDS(0.137)S(0.137)FS(0.588)PNT(0.137)GKK	_LTFDSSFS(ph)PNTGKK_	2	804.869	117
H3BLH0	Probable global transcription activator SNF2L2	Smarca2	1	3	S	8.95308e-18	IAKEEES(1)EEES(1)NEEEEEDDEEES(0.934)ES(0.066)EAK	_IAKEEES(ph)EEES(ph)NEEEEEDDEEES(ph)ESEAK_	3	1176.4	1523
H3BLH0	Probable global transcription activator SNF2L2	Smarca2	1	3	S	8.95308e-18	IAKEEES(1)EEES(1)NEEEEEDDEEES(0.934)ES(0.066)EAK	_IAKEEES(ph)EEES(ph)NEEEEEDDEEES(ph)ESEAK_	3	1176.4	1527
H3BLH0	Probable global transcription activator SNF2L2	Smarca2	0.934369	3	S	8.95308e-18	IAKEEES(1)EEES(1)NEEEEEDDEEES(0.934)ES(0.066)EAK	_IAKEEES(ph)EEES(ph)NEEEEEDDEEES(ph)ESEAK_	3	1176.4	1539
Q8C6M1	Ubiquitin carboxyl-terminal hydrolase 20	Usp20	1	2	S	5.35349e-06	AVPIAVADEGES(1)ES(1)EDDDLKPR	_AVPIAVADEGES(ph)ES(ph)EDDDLKPR_	3	834.682	132
Q8C6M1	Ubiquitin carboxyl-terminal hydrolase 20	Usp20	1	2	S	5.35349e-06	AVPIAVADEGES(1)ES(1)EDDDLKPR	_AVPIAVADEGES(ph)ES(ph)EDDDLKPR_	3	834.682	134
Q11011	Puromycin-sensitive aminopeptidase	Npepps	0.951905	1	S	0.000598357	KT(0.048)S(0.952)PPSV	_KTS(ph)PPSV_	2	398.186	916
Q5SRX1	TOM1-like protein 2	Tom1l2	0.836016	1	S	6.206e-07	AAET(0.002)VPDLPS(0.836)PPT(0.162)EAPAPASNTSTR	_AAETVPDLPS(ph)PPTEAPAPASNTSTR_	2	1279.09	479
Q9JIX8	Apoptotic chromatin condensation inducer in the nucleus	Acin1	0.999294	2	S	0.0366197	S(0.999)LS(0.991)PGVS(0.01)R	_S(ph)LS(ph)PGVSR_	2	481.691	655
Q9JIX8	Apoptotic chromatin condensation inducer in the nucleus	Acin1	0.990874	2	S	0.0366197	S(0.999)LS(0.991)PGVS(0.01)R	_S(ph)LS(ph)PGVSR_	2	481.691	657
Q9JIX8	Apoptotic chromatin condensation inducer in the nucleus	Acin1	0.972725	2	S	5.52606e-08	S(0.027)QS(0.973)PS(1)PPPLPEDLEK	_SQS(ph)PS(ph)PPPLPEDLEK_	2	890.876	389
Q9JIX8	Apoptotic chromatin condensation inducer in the nucleus	Acin1	0.99995	2	S	5.52606e-08	S(0.027)QS(0.973)PS(1)PPPLPEDLEK	_SQS(ph)PS(ph)PPPLPEDLEK_	2	890.876	391
F6RT34		Mbp	1	1	S	2.31313e-53	FS(1)WGAEGQKPGFGYGGR	_FS(ph)WGAEGQKPGFGYGGR_	2	940.909	156
F6RT34		Mbp	0.999998	1	S	8.03204e-05	S(1)PLPSHAR	_S(ph)PLPSHAR_	2	472.721	83
F6SEU4	Ras GTPase-activating protein SynGAP	Syngap1	0.999628	1	S	0.00548517	TVS(1)VPVEGR	_TVS(ph)VPVEGR_	2	512.247	87
Q99KY4	Cyclin-G-associated kinase	Gak	0.525768	2	S	6.43283e-06	ES(0.392)QS(0.526)VLIADGDGS(0.289)EVS(0.791)DEEEAS(0.003)FPSEER	_ESQS(ph)VLIADGDGSEVS(ph)DEEEASFPSEER_	3	1053.41	815
Q99KY4	Cyclin-G-associated kinase	Gak	0.790667	2	S	6.43283e-06	ES(0.392)QS(0.526)VLIADGDGS(0.289)EVS(0.791)DEEEAS(0.003)FPSEER	_ESQS(ph)VLIADGDGSEVS(ph)DEEEASFPSEER_	3	1053.41	827
F8WHW6	Phosphatidylinositol 4-phosphate 5-kinase type-1 gamma	Pip5k1c	0.945953	1	S	0.000868193	T(0.003)QS(0.946)S(0.051)GQDGRPQEEPHAEDLQK	_TQS(ph)SGQDGRPQEEPHAEDLQK_	3	806.35	554
F6SMW7	Heat shock 70 kDa protein 4L	Hspa4l	1	1	S	3.6707e-05	S(1)FDDPIVQTER	_S(ph)FDDPIVQTER_	2	693.8	194
P28028	Serine/threonine-protein kinase B-raf	Braf	0.821834	1	S	0.00029103	RDS(0.822)S(0.177)DDWEIPDGQIT(0.001)VGQR	_RDS(ph)SDDWEIPDGQITVGQR_	2	1127.49	483
P28028	Serine/threonine-protein kinase B-raf	Braf	0.499999	1	S	0.00029103	RDS(0.5)S(0.5)DDWEIPDGQITVGQR	_RDS(ph)SDDWEIPDGQITVGQR_	3	751.997	484
P28028	Serine/threonine-protein kinase B-raf	Braf	0.999836	1	S	0.000584187	SAS(1)EPSLNR	_SAS(ph)EPSLNR_	2	520.724	766
Q3UM45	Protein phosphatase 1 regulatory subunit 7	Ppp1r7	1	1;2	S	1.17555e-14	RVES(1)EES(1)GDEEGKK	_RVES(ph)EES(ph)GDEEGKK_	3	580.224	24
Q3UM45	Protein phosphatase 1 regulatory subunit 7	Ppp1r7	1	2	S	1.17555e-14	RVES(1)EES(1)GDEEGKK	_RVES(ph)EES(ph)GDEEGKK_	3	580.224	27
Q3UYG8	O-acetyl-ADP-ribose deacetylase MACROD2	Macrod2	1	1	S	0.00950976	GLS(1)PPHKK	_GLS(ph)PPHKK_	2	472.242	266
F6TYB7		Mbp	1	1	S	0.0364485	FS(1)WGGR	_FS(ph)WGGR_	2	395.158	176
Q6PCP5	Mitochondrial fission factor	Mff	1	3	S	0.0106403	NDS(1)IVT(1)PS(1)PPQAR	_NDS(ph)IVT(ph)PS(ph)PPQAR_	2	811.307	146
Q6PCP5	Mitochondrial fission factor	Mff	1	1;2;3	S	2.54842e-14	NDS(1)IVT(1)PS(1)PPQAR	_NDS(ph)IVT(ph)PS(ph)PPQAR_	2	811.307	151
Q9R1V6	Disintegrin and metalloproteinase domain-containing protein 22	Adam22	0.5402	4	S	4.7114e-10	S(0.54)NS(0.186)T(0.207)ET(0.066)LS(0.001)PAKS(0.244)PS(0.803)S(0.913)S(0.804)T(0.22)GS(0.016)IASSR	_S(ph)NSTETLSPAKSPS(ph)S(ph)S(ph)TGSIASSR_	2	1330	853
Q9R1V6	Disintegrin and metalloproteinase domain-containing protein 22	Adam22	0.997978	1;2;3;4	S	6.79466e-15	S(0.001)NS(0.998)T(0.001)ETLSPAK	_SNS(ph)TETLSPAK_	2	607.769	855
Q9R1V6	Disintegrin and metalloproteinase domain-containing protein 22	Adam22	0.993662	3;4	S	1.78363e-10	S(0.019)NS(0.451)T(0.527)ET(0.01)LS(0.994)PAKS(0.995)PS(0.186)S(0.513)S(0.237)T(0.065)GS(0.005)IASSR	_SNST(ph)ETLS(ph)PAKS(ph)PSS(ph)STGSIASSR_	3	887.004	860
Q9R1V6	Disintegrin and metalloproteinase domain-containing protein 22	Adam22	0.994911	2;3;4	S	6.79466e-15	S(0.019)NS(0.451)T(0.527)ET(0.01)LS(0.994)PAKS(0.995)PS(0.186)S(0.513)S(0.237)T(0.065)GS(0.005)IASSR	_SNST(ph)ETLS(ph)PAKS(ph)PSS(ph)STGSIASSR_	3	887.004	864
Q9R1V6	Disintegrin and metalloproteinase domain-containing protein 22	Adam22	0.802504	4	S	4.7114e-10	S(0.54)NS(0.186)T(0.207)ET(0.066)LS(0.001)PAKS(0.244)PS(0.803)S(0.913)S(0.804)T(0.22)GS(0.016)IASSR	_S(ph)NSTETLSPAKSPS(ph)S(ph)S(ph)TGSIASSR_	2	1330	866
Q9R1V6	Disintegrin and metalloproteinase domain-containing protein 22	Adam22	0.973199	2;4	S	1.78363e-10	SPS(0.027)S(0.973)S(0.976)T(0.022)GS(0.002)IASSR	_SPSS(ph)S(ph)TGSIASSR_	2	692.263	867
Q9R1V6	Disintegrin and metalloproteinase domain-containing protein 22	Adam22	0.975941	2;4	S	6.79466e-15	SPS(0.027)S(0.973)S(0.976)T(0.022)GS(0.002)IASSR	_SPSS(ph)S(ph)TGSIASSR_	2	692.263	868
G3X9G2	Misshapen-like kinase 1	Mink1	0.448096		S	1.93217e-05	QNS(0.448)DPT(0.448)S(0.104)EGPGPSPNPPSWVRPDNEAPPK	_QNS(ph)DPTSEGPGPSPNPPSWVRPDNEAPPK_	3	1045.47	644
F7BJK1		Pcdh1	1	2	S	6.95038e-25	GGQEPAGAGS(1)PS(1)PPEDR	_GGQEPAGAGS(ph)PS(ph)PPEDR_	2	884.832	1010
F7BJK1		Pcdh1	1	1;2	S	2.4457e-42	GGQEPAGAGS(1)PS(1)PPEDR	_GGQEPAGAGS(ph)PS(ph)PPEDR_	2	884.832	1012
Q02248	Catenin beta-1	Ctnnb1	0.495798		S	2.605e-07	T(0.496)S(0.496)MGGT(0.008)QQQFVEGVR	_T(ph)SM(ox)GGTQQQFVEGVR_	2	860.872	552
H9KV00	Protein SON	Son	1	3	S	0.00419823	RRS(1)FS(1)IS(1)PVR	_RRS(ph)FS(ph)IS(ph)PVR_	2	722.799	2027
H9KV00	Protein SON	Son	1	3	S	0.00419823	RRS(1)FS(1)IS(1)PVR	_RRS(ph)FS(ph)IS(ph)PVR_	2	722.799	2029
H9KV00	Protein SON	Son	1	3	S	0.00419823	RRS(1)FS(1)IS(1)PVR	_RRS(ph)FS(ph)IS(ph)PVR_	2	722.799	2031
H9KV00	Protein SON	Son	0.999905	3	S	0.00600954	S(1)FS(1)IS(0.754)PS(0.247)RR	_S(ph)FS(ph)IS(ph)PSRR_	2	638.73	1973
H9KV00	Protein SON	Son	0.999916	3	S	0.00600954	S(1)FS(1)IS(0.754)PS(0.247)RR	_S(ph)FS(ph)IS(ph)PSRR_	2	638.73	1975
H9KV00	Protein SON	Son	0.753563	3	S	0.00600954	S(1)FS(1)IS(0.754)PS(0.247)RR	_S(ph)FS(ph)IS(ph)PSRR_	2	638.73	1977
F7CZ64	Voltage-dependent calcium channel gamma-8 subunit	Cacng8	0.999972	2	S	3.21985e-09	AGGGAGGS(1)GGS(0.974)GPS(0.026)AILR	_AGGGAGGS(ph)GGS(ph)GPSAILR_	2	794.829	251
F7CZ64	Voltage-dependent calcium channel gamma-8 subunit	Cacng8	0.97448	2	S	3.21985e-09	AGGGAGGS(1)GGS(0.974)GPS(0.026)AILR	_AGGGAGGS(ph)GGS(ph)GPSAILR_	2	794.829	254
F8VQK3		Gucy1a2	0.999476	1	S	0.0396845	S(0.999)PPGPPGS(0.001)R	_S(ph)PPGPPGSR_	2	466.205	41
F8VQK5	SAM and SH3 domain-containing protein 1	Sash1	0.996316	1	S	1.45716e-05	S(0.004)HS(0.996)LDDLQGDADVGK	_SHS(ph)LDDLQGDADVGK_	2	818.846	831
F8WGF2	Nitric oxide synthase, brain	Nos1	1	2	S	0.0032144	KS(1)S(1)GDGPDLR	_KS(ph)S(ph)GDGPDLR_	2	596.226	891
F8WGF2	Nitric oxide synthase, brain	Nos1	1	2	S	0.0032144	KS(1)S(1)GDGPDLR	_KS(ph)S(ph)GDGPDLR_	2	596.226	892
Q68FL4	Putative adenosylhomocysteinase 3	Ahcyl2	0.998681	1	S	1.50318e-28	DGGEALVS(0.999)PDGT(0.001)VTEAPR	_DGGEALVS(ph)PDGTVTEAPR_	2	925.912	109
F8WHB1	Plasma membrane calcium-transporting ATPase 2	Atp2b2	0.499985	1	S	1.3419e-05	QNS(0.5)S(0.5)PPSSLNK	_QNS(ph)SPPSSLNK_	2	619.774	1200
F8WHB1	Plasma membrane calcium-transporting ATPase 2	Atp2b2	0.640791	1	S	1.3419e-05	QNS(0.358)S(0.641)PPS(0.001)SLNK	_QNSS(ph)PPSSLNK_	2	619.774	1201
P16283	Anion exchange protein 3	Slc4a3	0.999376	1	S	1.67327e-08	FS(0.001)IGS(0.999)DEDDSPGLPVK	_FSIGS(ph)DEDDSPGLPVK_	2	871.88	170
F8WHU5	Sister chromatid cohesion protein PDS5 homolog B	Pds5b	0.999212	1	S	7.65379e-14	AES(0.999)PET(0.001)SAVESTQSTPQK	_AES(ph)PETSAVESTQSTPQK_	2	978.925	1359
G3UW55		A230065H16Rik	0.785075	1	S	0.0120807	S(0.001)T(0.001)PQPAAPES(0.785)PT(0.213)EGPR	_(ac)STPQPAAPES(ph)PTEGPR_	2	872.383	11
G3UWG2	T-lymphoma invasion and metastasis-inducing protein 1	Tiam1	0.331395		S	1.9512e-05	FTIDS(0.005)DAIS(0.331)AS(0.331)S(0.331)PEKEPQQPAGGGDTDR	_FTIDSDAIS(ph)ASSPEKEPQQPAGGGDTDR_	3	986.1	1463
G3UWG2	T-lymphoma invasion and metastasis-inducing protein 1	Tiam1	0.331395		S	1.9512e-05	FTIDS(0.005)DAIS(0.331)AS(0.331)S(0.331)PEKEPQQPAGGGDTDR	_FTIDSDAIS(ph)ASSPEKEPQQPAGGGDTDR_	3	986.1	1465
G3UWG2	T-lymphoma invasion and metastasis-inducing protein 1	Tiam1	0.331395		S	1.9512e-05	FTIDS(0.005)DAIS(0.331)AS(0.331)S(0.331)PEKEPQQPAGGGDTDR	_FTIDSDAIS(ph)ASSPEKEPQQPAGGGDTDR_	3	986.1	1466
G3UWG2	T-lymphoma invasion and metastasis-inducing protein 1	Tiam1	0.790224	1	S	0.00169652	SNATNS(0.006)S(0.028)Y(0.002)S(0.79)PPT(0.174)GR	_SNATNSSYS(ph)PPTGR_	2	759.815	358
G3UWV4	Serine/threonine-protein kinase BRSK2	Brsk2	0.466355		S	1.07479e-05	S(0.379)IS(0.466)GAS(0.13)S(0.025)GLS(0.008)T(0.165)S(0.801)PLS(0.023)S(0.004)PR	_SIS(ph)GASSGLSTS(ph)PLSSPR_	2	925.9	437
G3UWV4	Serine/threonine-protein kinase BRSK2	Brsk2	0.801006	2	S	1.07479e-05	S(0.379)IS(0.466)GAS(0.13)S(0.025)GLS(0.008)T(0.165)S(0.801)PLS(0.023)S(0.004)PR	_SIS(ph)GASSGLSTS(ph)PLSSPR_	2	925.9	446
G3UWV4		Brsk2	0.999914	1	S	0.00683666	S(1)LDIAEAHPQFSK	_S(ph)LDIAEAHPQFSK_	2	761.851	417
G3UXK0		Dtnb	0.955261	1	S	0.028438	S(0.001)VLDS(0.044)PS(0.955)R	_SVLDSPS(ph)R_	2	470.71	366
G3UXW9	COP9 signalosome complex subunit 1	Gps1	1	1	S	3.02692e-17	EGS(1)QGELTPANSQSR	_EGS(ph)QGELTPANSQSR_	2	820.849	509
Q9Z1R2	Large proline-rich protein BAG6	Bag6	0.999533	1	S	0.000751962	ENAS(1)PAPGTTAEEAMSR	_ENAS(ph)PAPGTTAEEAM(ox)SR_	2	907.867	995
Q9Z1R2	Large proline-rich protein BAG6	Bag6	0.498976		S	0.0107253	VGDPPQT(0.002)LPEEPMEVQGAERT(0.499)S(0.499)PEPQR	_VGDPPQTLPEEPM(ox)EVQGAERT(ph)SPEPQR_	3	1024.13	986
Q6P542	ATP-binding cassette sub-family F member 1	Abcf1	0.982575	1	S	7.78765e-06	QLS(0.017)VPAS(0.983)DEEDEVPAPIPR	_QLSVPAS(ph)DEEDEVPAPIPR_	2	1064.99	107
G3X9K4	Serine/threonine-protein phosphatase 6 regulatory subunit 2	Ppp6r2	0.632427	1	S	6.36163e-06	NVPGLAAPS(0.184)S(0.632)PT(0.184)QK	_NVPGLAAPSS(ph)PTQK_	2	723.853	670
[truncated: 1,416 more rows]

## Sheet: sheet3-direct detection
Phosphopeptide identifications in mouse brain.Protein and phosphorylation site identification was performed by MaxQuant with integrated Andromeda search engine (v. 1.3.0.5). Tandem mass spectra were searched against Uniprot mouse reference proteome database (44455 sequences) concatenated with reverse decoy database and protein sequences of common contaminants. Trypsin/P was specified as cleavage …
[truncated: 103 more rows]
