# Supplementary material for: A novel rGR–TiO2–ZrO2 composite nanosheet for capturing phosphopeptides from biosamples
Source: Royal Society of Chemistry journal article supplement (doi:10.1039/c4tb01899k), 2015-01-01
Supplement: c4tb01899k3.xlsx [file c4tb01899k3.xlsx]

## Sheet: Sheet1-rGTZ
Phosphopeptide identifications in mouse liver. Protein and phosphorylation site identification was performed by MaxQuant with integrated Andromeda search engine (v. 1.3.0.5). Tandem mass spectra were searched against Uniprot mouse reference proteome database (44455 sequences) concatenated with reverse decoy database and protein sequences of common contaminants. Trypsin/P was specified as cleavage…
Protein	Protein name	Gene name	Localization prob	Number of Phospho (STY)	Amino acid	PEP	Phospho (STY) Probabilities	Modified sequence	Charge	m/z	Position
Q8K019	Bcl-2-associated transcription factor 1	Bclaf1	1	1;2	S	6.31168e-148	FHDS(1)EGDDT(0.993)EET(0.007)EDYR	_FHDS(ph)EGDDT(ph)EETEDYR_	2	1052.84	395
Q8K019	Bcl-2-associated transcription factor 1	Bclaf1	1	1	S	0.000574232	KAEGEPQEES(1)PLK	_KAEGEPQEES(ph)PLK_	2	761.345	177
P63166	Small ubiquitin-related modifier 1	Sumo1	1	1	S	2.12922e-17	S(1)DQEAKPSTEDLGDKK	_(ac)S(ph)DQEAKPSTEDLGDKK_	2	935.409	2
Q80XU3	Nuclear ubiquitous casein and cyclin-dependent kinase substrate 1	Nucks1	1	1	S	9.15023e-24	VVDYSQFQES(1)DDADEDYGR	_VVDYSQFQES(ph)DDADEDYGR_	2	1159.44	19
Q80XU3	Nuclear ubiquitous casein and cyclin-dependent kinase substrate 1	Nucks1	1	1	S	1.60461e-34	TPSPKEEDEEAES(1)PPEKK	_TPSPKEEDEEAES(ph)PPEKK_	2	1053.96	214
A2A841	Protein 4.1	Epb4.1	1	1;2	S	0.000257583	S(1)LDGAAAAESTDR	_S(ph)LDGAAAAESTDR_	2	672.277	568
Q52KI8	Serine/arginine repetitive matrix protein 1	Srrm1	1	4	S	2.59964e-10	AKS(1)PT(1)PS(0.037)LS(0.964)PARNS(0.999)DQEGGGK	_AKS(ph)PT(ph)PSLS(ph)PARNS(ph)DQEGGGK_	3	801.972	832
Q52KI8	Serine/arginine repetitive matrix protein 1	Srrm1	1	1	S	1.01611e-21	EKS(1)PELPEPSVR	_EKS(ph)PELPEPSVR_	2	724.345	220
Q52KI8	Serine/arginine repetitive matrix protein 1	Srrm1	1	1;2	S	5.2539e-124	KET(1)ES(1)EAEDDNLDDLER	_KET(ph)ES(ph)EAEDDNLDDLER_	3	723.27	915
Q52KI8	Serine/arginine repetitive matrix protein 1	Srrm1	1	1;2	S	1.37981e-63	KVELS(1)ES(1)EEDKGSK	_KVELS(ph)ES(ph)EEDKGSK_	2	862.855	461
Q52KI8	Serine/arginine repetitive matrix protein 1	Srrm1	1	2	S	1.37981e-63	KVELS(1)ES(1)EEDKGSK	_KVELS(ph)ES(ph)EEDKGSK_	2	862.855	463
Q52KI8	Serine/arginine repetitive matrix protein 1	Srrm1	1	2	S	1.52053e-09	S(1)PS(1)PAPPPPPPPPPPR	_S(ph)PS(ph)PAPPPPPPPPPPR_	3	582.267	572
Q52KI8	Serine/arginine repetitive matrix protein 1	Srrm1	1	2	S	1.52053e-09	S(1)PS(1)PAPPPPPPPPPPR	_S(ph)PS(ph)PAPPPPPPPPPPR_	3	582.267	574
A2APC3	Probable tubulin polyglutamylase TTLL9	Ttll9	1	2	S	0.0385291	QY(1)LAS(1)KHGPK	_QY(ph)LAS(ph)KHGPK_	2	644.778	306
Q9D6Z1	Nucleolar protein 56	Nop56	1	1;2;3	S	5.08786e-50	SSPKEEVAS(1)EPEEAAS(0.992)PT(0.007)T(0.001)PK	_SSPKEEVAS(ph)EPEEAAS(ph)PTTPK_	2	1165.99	536
Q9D6Z1	Nucleolar protein 56	Nop56	1	1	S	1.30484e-17	KAPKEELAS(1)DLEEMATSSAK	_KAPKEELAS(ph)DLEEMATSSAK_	3	739.012	513
A2AQN4	Acetyl-coenzyme A synthetase, cytoplasmic	Acss2	1	1	S	0.0176559	GWS(1)PPPEVR	_GWS(ph)PPPEVR_	2	552.747	30
A2AR02	Peptidyl-prolyl cis-trans isomerase G	Ppig	1	2	S	0.0182458	RS(1)ET(1)PPHWR	_RS(ph)ET(ph)PPHWR_	2	663.263	354
Q08943	FACT complex subunit SSRP1	Ssrp1	1	1	S	1.0381e-45	EGINPGYDDYADS(1)DEDQHDAYLER	_EGINPGYDDYADS(ph)DEDQHDAYLER_	3	956.37	444
Q02780	Nuclear factor 1 A-type	Nfia	1	2	S	0.000183815	LKS(1)VEDEMDS(1)PGEEPFYTGQGR	_LKS(ph)VEDEMDS(ph)PGEEPFYTGQGR_	3	877.683	303
E9Q6E5		Srsf11	1	1	S	5.80912e-83	DYDEEEQGYDS(1)EKEK	_DYDEEEQGYDS(ph)EKEK_	2	972.357	462
P57776	Elongation factor 1-delta	Eef1d	1	1;2	S	6.40737e-96	GAT(1)PAEDDEDKDIDLFGS(1)DEEEEDKEAAR	_GAT(ph)PAEDDEDKDIDLFGS(ph)DEEEEDKEAAR_	3	1119.43	162
Q7TNV0	Protein DEK	Dek	1	1	S	7.39729e-23	EES(1)EEEEEDDEDDDEEDEEEEKEK	_EES(ph)EEEEEDDEDDDEEDEEEEKEK_	3	1023.34	33
D3YVW2	Golgi integral membrane protein 4	Golim4	1	1	S	1.48871e-08	ALEEEEMEQVGQAEHLEEEHDPS(1)PEEQDRDWR	_ALEEEEMEQVGQAEHLEEEHDPS(ph)PEEQDRDWR_	4	989.91	356
Q3V1K7	Solute carrier organic anion transporter family member 2B1	Slco2b1	1	1;2	S	2.42184e-12	KVS(1)VEPQDS(1)HQDAQPR	_KVS(ph)VEPQDS(ph)HQDAQPR_	3	660.945	31
Q3V1K7	Solute carrier organic anion transporter family member 2B1	Slco2b1	1	2	S	0.000216077	KVS(1)VEPQDS(1)HQDAQPR	_KVS(ph)VEPQDS(ph)HQDAQPR_	3	660.945	37
D3YYY8		Arhgef26	1	1	S	0.000294058	ALDIDS(1)DEEPEAK	_ALDIDS(ph)DEEPEAK_	2	756.311	390
E9Q8Z8	Catenin delta-1	Ctnnd1	1	2;3	S	0.00328552	GS(1)LAS(1)LDS(1)LRK	_GS(ph)LAS(ph)LDS(ph)LRK_	2	693.777	346
E9Q8Z8	Catenin delta-1	Ctnnd1	1	2;3	S	0.00328552	GS(1)LAS(1)LDS(1)LRK	_GS(ph)LAS(ph)LDS(ph)LRK_	2	693.777	349
E9Q8Z8	Catenin delta-1	Ctnnd1	1	3	S	0.00376126	GS(1)LAS(1)LDS(1)LRK	_GS(ph)LAS(ph)LDS(ph)LRK_	2	693.777	352
Q9CQF4	Uncharacterized protein C6orf203 homolog	1700021F05Rik	1	1	S	2.65324e-42	EADEEDS(1)DEETSYPER	_EADEEDS(ph)DEETSYPER_	2	990.847	106
Q9DCL8	Protein phosphatase inhibitor 2	Ppp1r2	1	2	S	1.00358e-27	TREQES(1)S(1)GEEDNDLSPEER	_TREQES(ph)S(ph)GEEDNDLSPEER_	2	1183.94	123
D3Z4V2	Pre-mRNA 3'-end-processing factor FIP1	Fip1l1	1	2	S	4.70229e-32	ERDHS(0.86)PT(0.14)PSVFNS(1)DEER	_ERDHS(ph)PTPSVFNS(ph)DEER_	3	721.279	501
D3Z4T9	Zinc finger Ran-binding domain-containing protein 2	Zranb2	1	1	S	4.53289e-20	ENVEYIEREES(1)DGEYDEFGR	_ENVEYIEREES(ph)DGEYDEFGR_	3	849.006	130
D3Z4T9	Zinc finger Ran-binding domain-containing protein 2	Zranb2	1	1	S	3.1902e-147	EVEDKES(1)EGEEEDEDEDLSK	_EVEDKES(ph)EGEEEDEDEDLSK_	2	1210.46	163
Q9D0L7	Armadillo repeat-containing protein 10	Armc10	1	1	S	9.3502e-31	S(1)AEDLTDGSYDDILNAEQLKK	_S(ph)AEDLTDGSYDDILNAEQLKK_	2	1203.04	43
E9PWN0	Phosphatidate phosphatase LPIN2	Lpin2	1	2	S	2.3456e-12	KEEQAASPVAEDVGDVGVS(1)S(1)DDEKR	_KEEQAASPVAEDVGDVGVS(ph)S(ph)DDEKR_	3	926.39	224
E9PWN0	Phosphatidate phosphatase LPIN2	Lpin2	1	2	S	2.3456e-12	KEEQAASPVAEDVGDVGVS(1)S(1)DDEKR	_KEEQAASPVAEDVGDVGVS(ph)S(ph)DDEKR_	3	926.39	225
P51859	Hepatoma-derived growth factor	Hdgf	1	1	S	7.62158e-22	AGDVLEDS(1)PKRPK	_AGDVLEDS(ph)PKRPK_	3	497.912	165
P51859	Hepatoma-derived growth factor	Hdgf	1	2	S	1.00277e-95	GSAEGS(1)S(1)DEEGKLVIDEPAKEK	_GSAEGS(ph)S(ph)DEEGKLVIDEPAKEK_	2	1218.02	132
P51859	Hepatoma-derived growth factor	Hdgf	1	1;2	S	1.00277e-95	GSAEGS(1)S(1)DEEGKLVIDEPAKEK	_GSAEGS(ph)S(ph)DEEGKLVIDEPAKEK_	2	1218.02	133
E9PX68		Slc4a1ap	1	1	S	2.32024e-19	MLGEDS(1)DEEEEANTTEGK	_MLGEDS(ph)DEEEEANTTEGK_	2	1032.39	258
H3BJS0	Cutaneous T-cell lymphoma-associated antigen 5 homolog	Ctage5	1	2	S	0.0151597	S(1)LS(1)PPWEQDRR	_S(ph)LS(ph)PPWEQDRR_	2	765.811	597
H3BJS0	Cutaneous T-cell lymphoma-associated antigen 5 homolog	Ctage5	1	2	S	0.0151597	S(1)LS(1)PPWEQDRR	_S(ph)LS(ph)PPWEQDRR_	2	765.811	599
E9Q070	60S acidic ribosomal protein P0	Gm8730	1	2	S	1.55719e-30	AEAKEES(1)EES(1)DEDMGFGLFD	_AEAKEES(ph)EES(ph)DEDMGFGLFD_	3	798.946	304
E9Q070	60S acidic ribosomal protein P0	Gm8730	1	2	S	1.55719e-30	AEAKEES(1)EES(1)DEDMGFGLFD	_AEAKEES(ph)EES(ph)DEDMGFGLFD_	3	798.946	307
Q61699	Heat shock protein 105 kDa	Hsph1	1	1	S	0.0442973	IES(1)PKLER	_IES(ph)PKLER_	2	526.263	810
E9Q3T0	60S acidic ribosomal protein P1	Gm10073	1	2	S	3.89522e-39	KEES(1)EES(1)EDDMGFGLFD	_KEES(ph)EES(ph)EDDMGFGLFD_	2	1062.36	101
E9Q3T0	60S acidic ribosomal protein P1	Gm10073	1	2	S	3.89522e-39	KEES(1)EES(1)EDDMGFGLFD	_KEES(ph)EES(ph)EDDMGFGLFD_	2	1062.36	104
E9Q5C9		Nolc1	1	1	S	3.91812e-14	AAKES(1)EEEEEEEETEEKK	_AAKES(ph)EEEEEEEETEEKK_	3	744.969	563
E9Q8D0		Dnajc21	1	1	S	1.97378e-14	YEKEFGDGS(1)DENEVEDQEPR	_YEKEFGDGS(ph)DENEVEDQEPR_	3	817.987	283
E9Q983	Supervillin	Svil	1	2	S	0.000236151	S(0.003)IS(0.997)FPEVPRS(1)PK	_SIS(ph)FPEVPRS(ph)PK_	2	752.336	227
E9QNH7	Acyl-CoA-binding domain-containing protein 5	Acbd5	1	2	S	8.61505e-49	AES(0.002)S(0.045)DS(0.953)GAES(1)EEEEAQEELK	_AESSDS(ph)GAES(ph)EEEEAQEELK_	2	1157.41	191
E9QP00	Transformer-2 protein homolog alpha	Tra2a	1	2	S	1.28114e-07	S(1)DVEENNFEGRES(1)R	_(ac)S(ph)DVEENNFEGRES(ph)R_	2	935.338	2
E9QP00	Transformer-2 protein homolog alpha	Tra2a	1	2	S	1.28114e-07	S(1)DVEENNFEGRES(1)R	_(ac)S(ph)DVEENNFEGRES(ph)R_	2	935.338	14
F2Z3U3		Raph1	1	2	S	1.14839e-25	MEQLS(1)DEEIDHGAEEDS(1)DKEDQDLDK	_(ac)MEQLS(ph)DEEIDHGAEEDS(ph)DKEDQDLDK_	3	1074.73	5
F2Z3U3		Raph1	1	2	S	1.14839e-25	MEQLS(1)DEEIDHGAEEDS(1)DKEDQDLDK	_(ac)MEQLS(ph)DEEIDHGAEEDS(ph)DKEDQDLDK_	3	1074.73	17
Q8C6M1	Ubiquitin carboxyl-terminal hydrolase 20	Usp20	1	2	S	0.00039837	AVPIAVADEGES(1)ES(1)EDDDLKPR	_AVPIAVADEGES(ph)ES(ph)EDDDLKPR_	3	834.682	132
Q8C6M1	Ubiquitin carboxyl-terminal hydrolase 20	Usp20	1	2	S	0.00039837	AVPIAVADEGES(1)ES(1)EDDDLKPR	_AVPIAVADEGES(ph)ES(ph)EDDDLKPR_	3	834.682	134
Q8K1Z0	Ubiquinone biosynthesis protein COQ9, mitochondrial	Coq9	1	1	S	2.7333e-50	YTDQS(1)GEEEEDYESEEQLQHR	_YTDQS(ph)GEEEEDYESEEQLQHR_	2	1341.01	81
Q3UM45	Protein phosphatase 1 regulatory subunit 7	Ppp1r7	1	2	S	2.24414e-49	HGGGGIVANLS(1)EQS(1)LKDGVDR	_HGGGGIVANLS(ph)EQS(ph)LKDGVDR_	2	1135	45
Q3UM45	Protein phosphatase 1 regulatory subunit 7	Ppp1r7	1	2	S	2.24414e-49	HGGGGIVANLS(1)EQS(1)LKDGVDR	_HGGGGIVANLS(ph)EQS(ph)LKDGVDR_	2	1135	48
G3X9F6		Sh3tc1	1	2	S	7.36632e-05	RAS(1)S(1)LDLEEPR	_RAS(ph)S(ph)LDLEEPR_	2	716.797	481
G3X9F6		Sh3tc1	1	2	S	7.36632e-05	RAS(1)S(1)LDLEEPR	_RAS(ph)S(ph)LDLEEPR_	2	716.797	482
Q1HFZ0	tRNA (cytosine(34)-C(5))-methyltransferase	Nsun2	1	1	S	3.21615e-96	EGVILTNENAAS(1)PEQPGDEDAK	_EGVILTNENAAS(ph)PEQPGDEDAK_	2	1182.52	723
H3BL37	Treacle protein	Tcof1	1	1	S	0.00289069	KLS(1)GDLEAGAPK	_KLS(ph)GDLEAGAPK_	2	633.31	1227
H7BWY8		Tsr2	1	1	S	4.65795e-19	ETDVAEDDVDS(1)VEEMEVK	_ETDVAEDDVDS(ph)VEEMEVK_	2	1059.92	143
O35218	Cleavage and polyadenylation specificity factor subunit 2	Cpsf2	1	3	S	3.80419e-11	EADIDS(1)S(1)DES(1)DVEEDVDQPSAHK	_EADIDS(ph)S(ph)DES(ph)DVEEDVDQPSAHK_	3	919.651	419
O35218	Cleavage and polyadenylation specificity factor subunit 2	Cpsf2	1	3	S	3.80419e-11	EADIDS(1)S(1)DES(1)DVEEDVDQPSAHK	_EADIDS(ph)S(ph)DES(ph)DVEEDVDQPSAHK_	3	919.651	420
O35218	Cleavage and polyadenylation specificity factor subunit 2	Cpsf2	1	3	S	3.80419e-11	EADIDS(1)S(1)DES(1)DVEEDVDQPSAHK	_EADIDS(ph)S(ph)DES(ph)DVEEDVDQPSAHK_	3	919.651	423
O35295	Transcriptional activator protein Pur-beta	Purb	1	2	S	1.82055e-19	ADGDS(1)GS(1)ERGGGGGGGGGPGGFQPAPR	_(ac)ADGDS(ph)GS(ph)ERGGGGGGGGGPGGFQPAPR_	3	839.326	6
O35295	Transcriptional activator protein Pur-beta	Purb	1	2	S	1.82055e-19	ADGDS(1)GS(1)ERGGGGGGGGGPGGFQPAPR	_(ac)ADGDS(ph)GS(ph)ERGGGGGGGGGPGGFQPAPR_	3	839.326	8
O54774	AP-3 complex subunit delta-1	Ap3d1	1	1	S	1.5512e-25	VDIITEEMPENALPS(1)DEDDKDPNDPYR	_VDIITEEMPENALPS(ph)DEDDKDPNDPYR_	3	1066.45	784
Q9QYR7	Acyl-coenzyme A thioesterase 3	Acot3	1	1	S	0.00229417	ADS(1)HGELDLAR	_ADS(ph)HGELDLAR_	2	632.272	67
O70435	Proteasome subunit alpha type-3	Psma3	1	1	S	1.90268e-28	YAKESLKEEDES(1)DDDNM	_YAKESLKEEDES(ph)DDDNM(ox)_	2	1057.39	250
O88532	Zinc finger RNA-binding protein	Zfr	1	1	S	2.90842e-15	RDS(1)DGVDGFEAEGK	_RDS(ph)DGVDGFEAEGK_	2	781.312	1054
P00375	Dihydrofolate reductase	Dhfr	1	1	S	0.00199259	LIEQPELAS(1)K	_LIEQPELAS(ph)K_	2	604.302	108
P07901	Heat shock protein HSP 90-alpha	Hsp90aa1	1	1	S	6.00111e-169	ESDDKPEIEDVGS(1)DEEEEEKK	_ESDDKPEIEDVGS(ph)DEEEEEKK_	2	1258.51	263
P09405	Nucleolin	Ncl	1	2	S	4.94778e-50	KEDS(1)DEDEDEEDEDDS(1)DEDEDDEEEDEFEPPIVK	_KEDS(ph)DEDEDEEDEDDS(ph)DEDEDDEEEDEFEPPIVK_	3	1407.47	145
P09405	Nucleolin	Ncl	1	2	S	4.94778e-50	KEDS(1)DEDEDEEDEDDS(1)DEDEDDEEEDEFEPPIVK	_KEDS(ph)DEDEDEEDEDDS(ph)DEDEDDEEEDEFEPPIVK_	3	1407.47	157
P11499	Heat shock protein HSP 90-beta	Hsp90ab1	1	1	S	8.57284e-122	IEDVGS(1)DEEDDSGKDKK	_IEDVGS(ph)DEEDDSGKDKK_	2	973.399	255
P15864	Histone H1.2	Hist1h1c	1	1	S	0.000773502	S(1)EAAPAAPAAAPPAEK	_(ac)S(ph)EAAPAAPAAAPPAEK_	2	785.861	2
P17095	High mobility group protein HMG-I/HMG-Y	Hmga1	1	2	S	6.28572e-28	KLEKEEEEGISQES(1)S(1)EEEQ	_KLEKEEEEGISQES(ph)S(ph)EEEQ_	2	1198.97	103
P26231	Catenin alpha-1	Ctnna1	1	1	S	1.51269e-201	TPEELDDS(1)DFETEDFDVR	_TPEELDDS(ph)DFETEDFDVR_	2	1119.93	641
P26369	Splicing factor U2AF 65 kDa subunit	U2af2	1	1	S	2.10917e-06	EEHGGLIRS(1)PR	_EEHGGLIRS(ph)PR_	2	665.817	79
P26369	Splicing factor U2AF 65 kDa subunit	U2af2	1	1	S	0.00154395	S(1)DFDEFER	_(ac)S(ph)DFDEFER_	2	583.706	2
P35564	Calnexin	Canx	1	1	S	1.32103e-36	AEEDEILNRS(1)PR	_AEEDEILNRS(ph)PR_	2	754.841	582
P35564	Calnexin	Canx	1	2	S	7.18174e-67	QKS(1)DAEEDGVT(0.636)GS(0.364)QDEEDSKPK	_QKS(ph)DAEEDGVT(ph)GSQDEEDSKPK_	2	1269.99	553
Q3U3J1	2-oxoisovalerate dehydrogenase subunit alpha, mitochondrial	Bckdha	1	1	S	2.36916e-19	S(1)VDEVNYWDKQDHPISR	_S(ph)VDEVNYWDKQDHPISR_	2	1084.48	348
P58871	182 kDa tankyrase-1-binding protein	Tnks1bp1	1	2	S	7.46927e-54	VPS(1)S(1)DEEVVEEPQSR	_VPS(ph)S(ph)DEEVVEEPQSR_	2	923.861	1611
P58871	182 kDa tankyrase-1-binding protein	Tnks1bp1	1	2	S	7.46927e-54	VPS(1)S(1)DEEVVEEPQSR	_VPS(ph)S(ph)DEEVVEEPQSR_	2	923.861	1612
P62754	40S ribosomal protein S6	Rps6	1	3	S	0.00227913	RLS(1)S(1)LRAS(0.749)T(0.211)S(0.039)K	_RLS(ph)S(ph)LRAS(ph)TSK_	2	723.301	235
P70302	Stromal interaction molecule 1	Stim1	1	1	S	7.44003e-07	AEQS(1)LHDLQER	_AEQS(ph)LHDLQER_	2	703.309	257
P70452	Syntaxin-4	Stx4	1	1	S	2.82254e-30	QGDNIS(1)DDEDEVR	_QGDNIS(ph)DDEDEVR_	2	786.297	15
P97868	E3 ubiquitin-protein ligase RBBP6	Rbbp6	1	1	S	1.09817e-15	WDKDDFES(1)EEEDVK	_WDKDDFES(ph)EEEDVK_	2	925.854	1329
P99027	60S acidic ribosomal protein P2	Rplp2	1	2	S	3.7576e-45	KEES(1)EES(1)DDDMGFGLFD	_KEES(ph)EES(ph)DDDMGFGLFD_	2	1055.35	102
P99027	60S acidic ribosomal protein P2	Rplp2	1	2	S	3.7576e-45	KEES(1)EES(1)DDDMGFGLFD	_KEES(ph)EES(ph)DDDMGFGLFD_	2	1055.35	105
Q05915	GTP cyclohydrolase 1	Gch1	1	1	S	0.00106793	ELPRPGAS(1)PPAEK	_ELPRPGAS(ph)PPAEK_	2	714.848	24
Q05D44	Eukaryotic translation initiation factor 5B	Eif5b	1	1;2	S	1.03006e-179	TSFDENDS(1)EELEDKDSK	_TSFDENDS(ph)EELEDKDSK_	2	1034.4	114
Q05D44	Eukaryotic translation initiation factor 5B	Eif5b	1	1;2	S	5.03937e-30	TARPNSEAPLS(1)GS(1)EDADDSNKLSK	_TARPNSEAPLS(ph)GS(ph)EDADDSNKLSK_	3	883.707	137
Q3B7Z2	Oxysterol-binding protein 1	Osbp	1	2	S	7.26954e-19	MLAES(1)DDS(0.999)GDEES(0.001)VSQTDKTELQSTLR	_MLAES(ph)DDS(ph)GDEESVSQTDKTELQSTLR_	3	1044.43	188
Q3TDQ1	Dolichyl-diphosphooligosaccharide--protein glycosyltransferase subunit STT3B	Stt3b	1	1;2	S	5.09499e-12	ENPPVEDS(1)S(1)DEDDKRNPGNLYDK	_ENPPVEDS(ph)S(ph)DEDDKRNPGNLYDK_	2	1397.05	495
Q3TDQ1	Dolichyl-diphosphooligosaccharide--protein glycosyltransferase subunit STT3B	Stt3b	1	2	S	5.09499e-12	ENPPVEDS(1)S(1)DEDDKRNPGNLYDK	_ENPPVEDS(ph)S(ph)DEDDKRNPGNLYDK_	2	1397.05	496
Q9R0U0	Serine/arginine-rich splicing factor 10	Srsf10	1	2	S	0.00064371	S(1)RS(1)FDYNYR	_S(ph)RS(ph)FDYNYR_	2	684.245	131
Q3TIX9	U4/U6.U5 tri-snRNP-associated protein 2	Usp39	1	1	S	0.00402023	EREADEDS(1)EPEREVR	_EREADEDS(ph)EPEREVR_	3	642.601	81
Q3TQI7	Uncharacterized protein C9orf78 homolog		1	2	S	6.69977e-26	RADS(1)ES(1)EEDEQESEEVR	_RADS(ph)ES(ph)EEDEQESEEVR_	2	1092.39	15
Q3TQI7	Uncharacterized protein C9orf78 homolog		1	2	S	6.69977e-26	RADS(1)ES(1)EEDEQESEEVR	_RADS(ph)ES(ph)EEDEQESEEVR_	2	1092.39	17
Q3TXS7	26S proteasome non-ATPase regulatory subunit 1	Psmd1	1	2	S	2.02498e-44	TASAVAGKT(1)PDAS(1)PEPK	_TASAVAGKT(ph)PDAS(ph)PEPK_	2	893.887	315
Q3U0J8	TBC1 domain family member 2B	Tbc1d2b	1	1	S	1.65315e-36	ERDTSPDKGELVS(1)DEEEDT	_ERDTSPDKGELVS(ph)DEEEDT_	2	1115.95	959
Q3U0S6	Ras-interacting protein 1	Rasip1	1	2	S	0.00602638	S(0.001)VS(0.999)ELS(1)LQGR	_SVS(ph)ELS(ph)LQGR_	2	618.257	325
Q3UBG2	PTB-containing, cubilin and LRP1-interacting protein	Pid1	1	1	S	2.49821e-06	SSSSEEASQELES(1)DDG	_SSSSEEASQELES(ph)DDG_	2	868.805	214
Q3UHX2	28 kDa heat- and acid-stable phosphoprotein	Pdap1	1	1;2	S	8.58519e-104	SLDS(1)DES(1)EDEDDDYQQKR	_SLDS(ph)DES(ph)EDEDDDYQQKR_	3	778.604	60
Q3UHX2	28 kDa heat- and acid-stable phosphoprotein	Pdap1	1	2	S	8.58519e-104	SLDS(1)DES(1)EDEDDDYQQKR	_SLDS(ph)DES(ph)EDEDDDYQQKR_	3	778.604	63
Q3UMU9	Hepatoma-derived growth factor-related protein 2	Hdgfrp2	1	2	S	4.74262e-57	GGS(1)S(1)GEELEDEEPVK	_GGS(ph)S(ph)GEELEDEEPVK_	2	861.313	366
Q3UMU9	Hepatoma-derived growth factor-related protein 2	Hdgfrp2	1	2	S	4.74262e-57	GGS(1)S(1)GEELEDEEPVK	_GGS(ph)S(ph)GEELEDEEPVK_	2	861.313	367
Q3UPL0	Protein transport protein Sec31A	Sec31a	1	1	S	3.50368e-55	DSDQVAQS(1)DGEESPAAEEQLLGER	_DSDQVAQS(ph)DGEESPAAEEQLLGER_	2	1320.55	526
Q3UW53	Protein Niban	Fam129a	1	1	S	4.29002e-08	RVS(1)AILPGAPDNELPSNEVFQEPEEK	_RVS(ph)AILPGAPDNELPSNEVFQEPEEK_	3	982.469	601
Q4FK66	Pre-mRNA-splicing factor 38A	Prpf38a	1	2	S	7.98635e-26	VSALEEDMDDVES(1)S(1)EEEEEEDEKLER	_VSALEEDMDDVES(ph)S(ph)EEEEEEDEKLER_	3	1077.41	193
Q4FK66	Pre-mRNA-splicing factor 38A	Prpf38a	1	2	S	7.98635e-26	VSALEEDMDDVES(1)S(1)EEEEEEDEKLER	_VSALEEDMDDVES(ph)S(ph)EEEEEEDEKLER_	3	1077.41	194
Q569Z6	Thyroid hormone receptor-associated protein 3	Thrap3	1	2	S	1.90057e-42	ERS(1)PALKS(1)PLQSVVVR	_ERS(ph)PALKS(ph)PLQSVVVR_	3	642.659	248
Q569Z6	Thyroid hormone receptor-associated protein 3	Thrap3	1	1;2	S	1.19423e-33	WAHDKFS(1)GEEGEIEDDES(0.806)GT(0.194)ENREEK	_WAHDKFS(ph)GEEGEIEDDES(ph)GTENREEK_	4	796.558	924
Q5NCR9	Nuclear speckle splicing regulatory protein 1	Nsrp1	1	2	S	4.39574e-18	GAQEAEENPDADREFDDES(1)S(1)EDGEKR	_GAQEAEENPDADREFDDES(ph)S(ph)EDGEKR_	3	1029.05	254
Q5NCR9	Nuclear speckle splicing regulatory protein 1	Nsrp1	1	2	S	4.39574e-18	GAQEAEENPDADREFDDES(1)S(1)EDGEKR	_GAQEAEENPDADREFDDES(ph)S(ph)EDGEKR_	3	1029.05	255
Q5SQM0	Echinoderm microtubule-associated protein-like 6	Eml6	1	2	S	0.0452294	KEMIS(1)DIKFS(1)K	_KEM(ox)IS(ph)DIKFS(ph)K_	2	751.324	1086
Q5SQM0	Echinoderm microtubule-associated protein-like 6	Eml6	1	2	S	0.0452294	KEMIS(1)DIKFS(1)K	_KEM(ox)IS(ph)DIKFS(ph)K_	2	751.324	1091
Q61136	Serine/threonine-protein kinase PRP4 homolog	Prpf4b	1	2	S	7.20027e-43	EVIEAS(1)DKEGLS(1)PAKR	_EVIEAS(ph)DKEGLS(ph)PAKR_	3	630.287	88
Q61136	Serine/threonine-protein kinase PRP4 homolog	Prpf4b	1	2	S	7.20027e-43	EVIEAS(1)DKEGLS(1)PAKR	_EVIEAS(ph)DKEGLS(ph)PAKR_	3	630.287	94
Q61136	Serine/threonine-protein kinase PRP4 homolog	Prpf4b	1	1	S	0.0155809	VGKARS(1)PAEEK	_VGKARS(ph)PAEEK_	2	626.308	258
Q61586	Glycerol-3-phosphate acyltransferase 1, mitochondrial	Gpam	1	1;2	S	1.11412e-06	LPELNWRS(1)DEEDEDS(1)DFGEEQR	_LPELNWRS(ph)DEEDEDS(ph)DFGEEQR_	3	952.362	687
Q61586	Glycerol-3-phosphate acyltransferase 1, mitochondrial	Gpam	1	1;2	S	2.40001e-42	SDEEDEDS(1)DFGEEQR	_SDEEDEDS(ph)DFGEEQR_	2	933.813	694
Q62048	Astrocytic phosphoprotein PEA-15	Pea15	1	1	S	0.000345733	DIIRQPS(1)EEEIIK	_DIIRQPS(ph)EEEIIK_	2	825.411	116
Q62318	Transcription intermediary factor 1-beta	Trim28	1	1	S	0.000159067	S(1)GEGEVSGLLR	_S(ph)GEGEVSGLLR_	2	592.271	473
Q62422	Osteoclast-stimulating factor 1	Ostf1	1	1	S	7.4671e-42	TLSNAEDYLDDEDS(1)D	_TLSNAEDYLDDEDS(ph)D_	2	891.317	214
Q6P4T2		Snrnp200	1	1	S	8.22858e-33	EEAS(1)DDDMEGDEAVVR	_EEAS(ph)DDDMEGDEAVVR_	2	923.838	225
Q6P542	ATP-binding cassette sub-family F member 1	Abcf1	1	1	S	1.1212e-70	EAEQGS(1)GEEKEEKEGDLK	_EAEQGS(ph)GEEKEEKEGDLK_	2	1036.44	225
Q6PFD9		Nup98	1	1	S	3.5658e-08	YGLQDS(1)DEEEEEHPPK	_YGLQDS(ph)DEEEEEHPPK_	2	991.389	888
Q6PGL7	WASH complex subunit FAM21	Fam21	1	2	S	2.23697e-22	AGNS(1)DS(1)EEDDANERVDLILEPK	_AGNS(ph)DS(ph)EEDDANERVDLILEPK_	3	859.353	157
Q6PGL7	WASH complex subunit FAM21	Fam21	1	2	S	2.23697e-22	AGNS(1)DS(1)EEDDANERVDLILEPK	_AGNS(ph)DS(ph)EEDDANERVDLILEPK_	3	859.353	159
Q6ZQ58	La-related protein 1	Larp1	1	1	S	1.70307e-06	ESPRPPAAAEAPAGS(1)DGEDGGRR	_ESPRPPAAAEAPAGS(ph)DGEDGGRR_	3	777.343	81
Q6ZQ58	La-related protein 1	Larp1	1	2	S	4.56345e-30	KNTFTAWS(1)EEDS(1)DYEIDDRDVNK	_KNTFTAWS(ph)EEDS(ph)DYEIDDRDVNK_	3	979.721	604
Q78JT3	3-hydroxyanthranilate 3,4-dioxygenase	Haao	1	1	S	0.000173934	VKS(1)WVEENR	_VKS(ph)WVEENR_	2	613.782	9
Q7TQ95	Protein lunapark	Lnp	1	1	S	0.000648668	ADS(1)VPNLEPSEESLVTK	_ADS(ph)VPNLEPSEESLVTK_	2	947.938	411
Q8BGE6	Cysteine protease ATG4B	Atg4b	1	1	S	0.000208751	FFDS(1)EDEDFEILSL	_FFDS(ph)EDEDFEILSL_	2	893.361	383
Q8BK48		Ces2e	1	1	S	4.72812e-05	TLPQKIQELKGS(1)QER	_TLPQKIQELKGS(ph)QER_	2	917.975	552
Q8BRV5	Uncharacterized protein KIAA1671	Kiaa1671	1	1	S	0.00210811	RDES(1)DEEPPRVER	_RDES(ph)DEEPPRVER_	3	565.244	205
Q8BTI8	Serine/arginine repetitive matrix protein 2	Srrm2	1	3;4	S	1.47904e-14	AQS(1)GT(1)DS(1)S(1)PEHKIPAPR	_AQS(ph)GT(ph)DS(ph)S(ph)PEHKIPAPR_	3	699.921	1572
Q8BTI8	Serine/arginine repetitive matrix protein 2	Srrm2	1	3;4	S	1.47904e-14	AQS(1)GT(1)DS(1)S(1)PEHKIPAPR	_AQS(ph)GT(ph)DS(ph)S(ph)PEHKIPAPR_	3	699.921	1576
Q8BTI8	Serine/arginine repetitive matrix protein 2	Srrm2	1	3;4	S	1.47904e-14	AQS(1)GT(1)DS(1)S(1)PEHKIPAPR	_AQS(ph)GT(ph)DS(ph)S(ph)PEHKIPAPR_	3	699.921	1577
Q8BTI8	Serine/arginine repetitive matrix protein 2	Srrm2	1	3;4	S	2.71567e-09	HAS(1)S(1)S(1)PES(1)LKPTPAPGSR	_HAS(ph)S(ph)S(ph)PES(ph)LKPTPAPGSR_	3	709.265	433
Q8BTI8	Serine/arginine repetitive matrix protein 2	Srrm2	1	3;4	S	2.71567e-09	HAS(1)S(1)S(1)PES(1)LKPTPAPGSR	_HAS(ph)S(ph)S(ph)PES(ph)LKPTPAPGSR_	3	709.265	434
Q8BTI8	Serine/arginine repetitive matrix protein 2	Srrm2	1	3;4	S	4.13766e-09	HAS(1)S(1)S(1)PES(1)LKPTPAPGSR	_HAS(ph)S(ph)S(ph)PES(ph)LKPTPAPGSR_	3	709.265	435
Q8BTI8	Serine/arginine repetitive matrix protein 2	Srrm2	1	2;3	S	0.00102557	S(1)LT(1)RS(1)PPAIR	_S(ph)LT(ph)RS(ph)PPAIR_	2	669.274	2019
Q8BTI8	Serine/arginine repetitive matrix protein 2	Srrm2	1	2;3	S	0.00102557	S(1)LT(1)RS(1)PPAIR	_S(ph)LT(ph)RS(ph)PPAIR_	2	669.274	2023
Q8BTI8	Serine/arginine repetitive matrix protein 2	Srrm2	1	2	S	0.0148849	S(1)RS(1)PLAIR	_S(ph)RS(ph)PLAIR_	2	530.241	1996
Q8BTI8	Serine/arginine repetitive matrix protein 2	Srrm2	1	2	S	0.0148849	S(1)RS(1)PLAIR	_S(ph)RS(ph)PLAIR_	2	530.241	1998
Q8BTI8	Serine/arginine repetitive matrix protein 2	Srrm2	1	3	S	0.014782	S(1)RS(1)RT(1)PLLPR	_S(ph)RS(ph)RT(ph)PLLPR_	2	711.806	1982
Q8BTI8	Serine/arginine repetitive matrix protein 2	Srrm2	1	2;3	S	0.014782	S(1)RT(1)PLLPR	_S(ph)RT(ph)PLLPR_	2	550.257	1984
Q8BW45		E330021D16Rik	1	2	S	0.0360015	QKEGIDY(1)ILLNFS(1)FK	_QKEGIDY(ph)ILLNFS(ph)FK_	2	987.954	270
Q8C1D8	Protein IWS1 homolog	Iws1	1	2	S	8.39832e-06	AAVLS(1)DS(1)EDDAGNASAKK	_AAVLS(ph)DS(ph)EDDAGNASAKK_	2	954.885	343
Q8C1D8	Protein IWS1 homolog	Iws1	1	2	S	8.56956e-39	ETTVAS(1)DS(1)EEEAGKEESSVK	_ETTVAS(ph)DS(ph)EEEAGKEESSVK_	2	1136.44	386
Q8C1D8	Protein IWS1 homolog	Iws1	1	2;3	S	0.000165688	IS(1)DS(1)ES(1)EELPKPR	_IS(ph)DS(ph)ES(ph)EELPKPR_	2	863.822	183
Q8C1D8	Protein IWS1 homolog	Iws1	1	2;3	S	0.000165688	IS(1)DS(1)ES(1)EELPKPR	_IS(ph)DS(ph)ES(ph)EELPKPR_	2	863.822	185
Q8C1D8	Protein IWS1 homolog	Iws1	1	3	S	0.0283953	IS(1)DS(1)ES(1)EELPKPR	_IS(ph)DS(ph)ES(ph)EELPKPR_	2	863.822	187
Q8C4Y1		Max	1	1	S	4.84113e-12	S(1)DNDDIEVESDADKR	_(ac)S(ph)DNDDIEVESDADKR_	2	915.357	2
Q8CH25	SAFB-like transcription modulator	Sltm	1	1	S	1.12483e-32	DVQDAIAQS(1)PEKEAK	_DVQDAIAQS(ph)PEKEAK_	3	570.264	289
Q8CHW4	Translation initiation factor eIF-2B subunit epsilon	Eif2b5	1	1	S	0.0282132	AGS(1)PQLDDIR	_AGS(ph)PQLDDIR_	2	576.258	540
Q8CI75	DIS3-like exonuclease 2	Dis3l2	1	1	S	6.75088e-07	RPGLEKAS(1)DEEPED	_RPGLEKAS(ph)DEEPED_	2	826.346	864
Q8CIN4	Serine/threonine-protein kinase PAK 2	Pak2	1	1	S	0.000570334	S(1)DNGELEDKPPAPPVR	_(ac)S(ph)DNGELEDKPPAPPVR_	2	921.917	2
Q8JZQ9	Eukaryotic translation initiation factor 3 subunit B	Eif3b	1	2	S	1.26835e-153	GHPSAGAEEEGGS(1)DGS(1)AAEAEPR	_GHPSAGAEEEGGS(ph)DGS(ph)AAEAEPR_	2	1164.43	120
Q8JZQ9	Eukaryotic translation initiation factor 3 subunit B	Eif3b	1	2	S	1.26835e-153	GHPSAGAEEEGGS(1)DGS(1)AAEAEPR	_GHPSAGAEEEGGS(ph)DGS(ph)AAEAEPR_	2	1164.43	123
Q8JZX4	Splicing factor 45	Rbm17	1	1	S	8.55911e-05	RPDPDS(1)DEDEDYERER	_RPDPDS(ph)DEDEDYERER_	3	701.603	155
Q8K2C9	3-hydroxyacyl-CoA dehydratase 3	ptplad1	1	1	S	1.55498e-29	WLDES(1)DAEMELR	_WLDES(ph)DAEMELR_	2	787.316	114
Q8R3F0		Larp1b	1	1	S	7.03882e-36	LDGPTENIS(1)EDEAQSSSQR	_LDGPTENIS(ph)EDEAQSSSQR_	2	1071.94	60
Q8VBT0	Thioredoxin-related transmembrane protein 1	Tmx1	1	1	S	9.71492e-149	KVEEEQEADEEDVS(1)EEEAEDREGASK	_KVEEEQEADEEDVS(ph)EEEAEDREGASK_	3	1016.08	245
Q8VDP4	DBIRD complex subunit KIAA1967 homolog		1	3	S	3.89302e-21	S(1)VAS(1)NQS(1)EMEYSSLQDMPK	_S(ph)VAS(ph)NQS(ph)EMEYSSLQDMPK_	2	1185.92	674
Q8VDP4	DBIRD complex subunit KIAA1967 homolog		1	3	S	3.89302e-21	S(1)VAS(1)NQS(1)EMEYSSLQDMPK	_S(ph)VAS(ph)NQS(ph)EMEYSSLQDMPK_	2	1185.92	677
Q8VDP4	DBIRD complex subunit KIAA1967 homolog		1	3	S	3.89302e-21	S(1)VAS(1)NQS(1)EMEYSSLQDMPK	_S(ph)VAS(ph)NQS(ph)EMEYSSLQDMPK_	2	1185.92	680
Q8VH51	RNA-binding protein 39	Rbm39	1	1	S	1.61989e-08	DKS(1)PVREPIDNLTPEER	_DKS(ph)PVREPIDNLTPEER_	3	692.332	136
Q8VHR5	Transcriptional repressor p66-beta	Gatad2b	1	4	S	2.2525e-10	GRLT(1)PS(1)PDIIVLS(1)DNEAS(0.059)S(0.941)PR	_GRLT(ph)PS(ph)PDIIVLS(ph)DNEASS(ph)PR_	3	848.679	123
Q9Z2F7	BCL2/adenovirus E1B 19 kDa protein-interacting protein 3-like	Bnip3l	1	3	S	0.00535416	DHS(1)S(1)QS(1)EEEVVEGEKEVEALKK	_DHS(ph)S(ph)QS(ph)EEEVVEGEKEVEALKK_	3	909.368	116
Q9Z2F7	BCL2/adenovirus E1B 19 kDa protein-interacting protein 3-like	Bnip3l	1	3	S	0.00535416	DHS(1)S(1)QS(1)EEEVVEGEKEVEALKK	_DHS(ph)S(ph)QS(ph)EEEVVEGEKEVEALKK_	3	909.368	117
Q9Z2F7	BCL2/adenovirus E1B 19 kDa protein-interacting protein 3-like	Bnip3l	1	3	S	0.00535416	DHS(1)S(1)QS(1)EEEVVEGEKEVEALKK	_DHS(ph)S(ph)QS(ph)EEEVVEGEKEVEALKK_	3	909.368	119
Q9QXY1	Tight junction protein ZO-3	Tjp3	1	1	S	0.00488445	RNS(1)EEFGVK	_RNS(ph)EEFGVK_	2	573.253	195
Q924Z4	Ceramide synthase 2	Cers2	1	3;4	S	8.18476e-45	LIEDERS(1)DREET(1)ES(1)S(1)EGEETAAGAGAK	_LIEDERS(ph)DREET(ph)ES(ph)S(ph)EGEETAAGAGAK_	3	1062.72	341
Q924Z4	Ceramide synthase 2	Cers2	1	3;4	S	8.18476e-45	LIEDERS(1)DREET(1)ES(1)S(1)EGEETAAGAGAK	_LIEDERS(ph)DREET(ph)ES(ph)S(ph)EGEETAAGAGAK_	3	1062.72	348
Q924Z4	Ceramide synthase 2	Cers2	1	3;4	S	8.18476e-45	LIEDERS(1)DREET(1)ES(1)S(1)EGEETAAGAGAK	_LIEDERS(ph)DREET(ph)ES(ph)S(ph)EGEETAAGAGAK_	3	1062.72	349
Q99J36	THUMP domain-containing protein 1	Thumpd1	1	2	S	1.16444e-30	FIDKDQQPS(1)GS(1)EGEDDDAEAALKK	_FIDKDQQPS(ph)GS(ph)EGEDDDAEAALKK_	4	689.036	86
Q99J36	THUMP domain-containing protein 1	Thumpd1	1	2	S	1.16444e-30	FIDKDQQPS(1)GS(1)EGEDDDAEAALKK	_FIDKDQQPS(ph)GS(ph)EGEDDDAEAALKK_	4	689.036	88
Q99KG5	Lipolysis-stimulated lipoprotein receptor	Lsr	1	2	S	6.85993e-25	S(1)VDALDDINRPGS(0.039)T(0.033)ES(0.139)GRS(0.575)S(0.197)PPS(0.007)S(0.009)GR	_S(ph)VDALDDINRPGSTESGRS(ph)SPPSSGR_	3	935.401	436
Q99L45	Eukaryotic translation initiation factor 2 subunit 2	Eif2s2	1	1	S	5.57641e-10	S(1)GDEMIFDPTMSKK	_(ac)S(ph)GDEMIFDPTMSKK_	2	854.354	2
Q99MR6	Serrate RNA effector molecule homolog	Srrt	1	1	S	0.00255463	HELS(1)PPQKR	_HELS(ph)PPQKR_	2	586.285	74
Q9CQU1	Microfibrillar-associated protein 1	Mfap1	1	2	S	0.00850931	KIVEPEVVGES(1)DS(1)EVEGDAWR	_KIVEPEVVGES(ph)DS(ph)EVEGDAWR_	3	830.687	116
Q9CQU1	Microfibrillar-associated protein 1	Mfap1	1	2	S	0.00850931	KIVEPEVVGES(1)DS(1)EVEGDAWR	_KIVEPEVVGES(ph)DS(ph)EVEGDAWR_	3	830.687	118
Q9CQU1	Microfibrillar-associated protein 1	Mfap1	1	2	S	2.79333e-26	LEREDS(1)S(1)EEEEEEIDDEEIERR	_LEREDS(ph)S(ph)EEEEEEIDDEEIERR_	3	975.711	132
Q9CQU1	Microfibrillar-associated protein 1	Mfap1	1	2	S	2.79333e-26	LEREDS(1)S(1)EEEEEEIDDEEIERR	_LEREDS(ph)S(ph)EEEEEEIDDEEIERR_	3	975.711	133
Q9CR86	Calcium-regulated heat stable protein 1	Carhsp1	1	2;3	S	4.27143e-06	DRS(1)PS(1)PLRGNVVPSPLPTR	_DRS(ph)PS(ph)PLRGNVVPSPLPTR_	3	735.691	31
Q9CY50	Translocon-associated protein subunit alpha	Ssr1	1	1	S	1.68291e-19	VEMGTSSQNDVDMSWIPQETLNQINKAS(1)PR	_VEMGTSSQNDVDMSWIPQETLNQINKAS(ph)PR_	3	1152.53	268
Q9CZ44	NSFL1 cofactor p47	Nsfl1c	1	1	S	0.0146236	HS(1)GQDVHVVLK	_HS(ph)GQDVHVVLK_	2	649.816	176
Q9CZ44	NSFL1 cofactor p47	Nsfl1c	1	1	S	0.00299035	KS(1)PNELVDDLFK	_KS(ph)PNELVDDLFK_	2	742.855	114
Q9CZW5	Mitochondrial import receptor subunit TOM70	Tomm70a	1	1	S	1.62262e-37	AS(1)PALGSGHHDGSGDSLEMSSLDR	_AS(ph)PALGSGHHDGSGDSLEMSSLDR_	3	821.68	94
Q9D0J8	Parathymosin	Ptms	1	2	S	1.09243e-07	S(1)EKS(1)VEAAAELSAK	_(ac)S(ph)EKS(ph)VEAAAELSAK_	2	811.342	2
Q9D0J8	Parathymosin	Ptms	1	2	S	1.09243e-07	S(1)EKS(1)VEAAAELSAK	_(ac)S(ph)EKS(ph)VEAAAELSAK_	2	811.342	5
Q9D0V7	Receptor-binding cancer antigen expressed on SiSo cells	Ebag9	1	1	S	1.31925e-23	KLS(1)GDQITLPTTVDYSSVPK	_KLS(ph)GDQITLPTTVDYSSVPK_	2	1115.06	36
Q9DBC7	cAMP-dependent protein kinase type I-alpha regulatory subunit	Prkar1a	1	1	S	3.77917e-11	EDEIS(1)PPPPNPVVK	_EDEIS(ph)PPPPNPVVK_	2	799.379	83
Q9DBR0	A-kinase anchor protein 8	Akap8	1	2	S	6.64032e-35	ADS(1)DGDLS(1)ENDDGAGDLR	_ADS(ph)DGDLS(ph)ENDDGAGDLR_	2	991.338	320
Q9DBR0	A-kinase anchor protein 8	Akap8	1	2	S	6.64032e-35	ADS(1)DGDLS(1)ENDDGAGDLR	_ADS(ph)DGDLS(ph)ENDDGAGDLR_	2	991.338	325
Q9DBR1	5'-3' exoribonuclease 2	Xrn2	1	2	S	3.03586e-98	RKAEDS(1)DS(1)EPEPEDNVR	_RKAEDS(ph)DS(ph)EPEPEDNVR_	2	1066.91	499
Q9DBR1	5'-3' exoribonuclease 2	Xrn2	1	2	S	3.03586e-98	RKAEDS(1)DS(1)EPEPEDNVR	_RKAEDS(ph)DS(ph)EPEPEDNVR_	2	1066.91	501
Q9DCC8	Mitochondrial import receptor subunit TOM20 homolog	Tomm20	1	2	S	0.00680154	IVS(1)AQS(1)LAEDDVE	_IVS(ph)AQS(ph)LAEDDVE_	2	768.299	135
Q9DCC8	Mitochondrial import receptor subunit TOM20 homolog	Tomm20	1	2	S	0.00680154	IVS(1)AQS(1)LAEDDVE	_IVS(ph)AQS(ph)LAEDDVE_	2	768.299	138
Q9ERA6	Tuftelin-interacting protein 11	Tfip11	1	2	S	2.58492e-24	GAAEEADS(1)EDS(1)DAEEKPVKQEDFPK	_GAAEEADS(ph)EDS(ph)DAEEKPVKQEDFPK_	3	961.049	96
Q9ERA6	Tuftelin-interacting protein 11	Tfip11	1	2	S	2.58492e-24	GAAEEADS(1)EDS(1)DAEEKPVKQEDFPK	_GAAEEADS(ph)EDS(ph)DAEEKPVKQEDFPK_	3	961.049	99
Q9ERG0	LIM domain and actin-binding protein 1	Lima1	1	1	S	2.28451e-14	ELS(1)VEEQIKR	_ELS(ph)VEEQIKR_	2	655.821	735
Q9ESX5	H/ACA ribonucleoprotein complex subunit 4	Dkc1	1	2;3	S	5.95998e-35	KRDS(1)ES(1)ES(1)DETPTVPQLK	_KRDS(ph)ES(ph)ES(ph)DETPTVPQLK_	2	1143.45	451
Q9ESX5	H/ACA ribonucleoprotein complex subunit 4	Dkc1	1	2;3	S	5.95998e-35	KRDS(1)ES(1)ES(1)DETPTVPQLK	_KRDS(ph)ES(ph)ES(ph)DETPTVPQLK_	2	1143.45	453
Q9JIK5	Nucleolar RNA helicase 2	Ddx21	1	1	S	1.64573e-19	EIITEEPS(1)EEEADMPKPK	_EIITEEPS(ph)EEEADMPKPK_	2	1076.47	118
Q9JJL3	Solute carrier organic anion transporter family member 1B2	Slco1b2	1	1;2	S	2.51775e-10	KNS(1)AS(1)LHVLK	_KNS(ph)AS(ph)LHVLK_	2	628.794	288
Q9JJL3	Solute carrier organic anion transporter family member 1B2	Slco1b2	1	2	S	2.51775e-10	KNS(1)AS(1)LHVLK	_KNS(ph)AS(ph)LHVLK_	2	628.794	290
Q9JMH9	Unconventional myosin-XVIIIa	Myo18a	1	1;2	S	2.41311e-11	NKLEGDS(1)DVDS(1)ELEDRVDGVK	_NKLEGDS(ph)DVDS(ph)ELEDRVDGVK_	3	827.014	1966
Q9JMH9	Unconventional myosin-XVIIIa	Myo18a	1	2	S	2.22238e-06	NKLEGDS(1)DVDS(1)ELEDRVDGVK	_NKLEGDS(ph)DVDS(ph)ELEDRVDGVK_	3	827.014	1970
Q9QYG0	Protein NDRG2	Ndrg2	1	2;3	S	2.60553e-09	S(1)RT(1)AS(1)LTSAASIDGSR	_S(ph)RT(ph)AS(ph)LTSAASIDGSR_	2	910.355	328
Q9R078	5'-AMP-activated protein kinase subunit beta-1	Prkab1	1	1	S	1.07479e-27	S(1)QNNFVAILDLPEGEHQYK	_S(ph)QNNFVAILDLPEGEHQYK_	2	1141.53	108
Q9R0Q7	Prostaglandin E synthase 3	Ptges3	1	1	S	9.99177e-98	DWEDDS(1)DEDMSNFDR	_DWEDDS(ph)DEDMSNFDR_	2	978.317	113
Q9Z1T1	AP-3 complex subunit beta-1	Ap3b1	1	1	S	3.20516e-41	NFYES(1)EEEEEEKEK	_NFYES(ph)EEEEEEKEK_	2	949.864	276
Q9Z1Z0	General vesicular transport factor p115	Uso1	1	1	S	5.31395e-28	DLGHPVEEEDES(1)GDQEDDDDEIDDGDKDQDI	_DLGHPVEEEDES(ph)GDQEDDDDEIDDGDKDQDI_	3	1190.11	940
Q9Z204	Heterogeneous nuclear ribonucleoproteins C1/C2	Hnrnpc	1	1	S	5.66457e-63	MESEAGADDS(1)AEEGDLLDDDDNEDRGDDQLELK	_MESEAGADDS(ph)AEEGDLLDDDDNEDRGDDQLELK_	3	1231.15	268
Q52KI8	Serine/arginine repetitive matrix protein 1	Srrm1	1	2	T	1.36402e-85	KET(1)ES(1)EAEDDNLDDLER	_KET(ph)ES(ph)EAEDDNLDDLER_	3	723.27	913
A2AR02	Peptidyl-prolyl cis-trans isomerase G	Ppig	1	2	T	0.0182458	RS(1)ET(1)PPHWR	_RS(ph)ET(ph)PPHWR_	2	663.263	356
P57776	Elongation factor 1-delta	Eef1d	1	2	T	1.11367e-27	GAT(1)PAEDDEDKDIDLFGS(1)DEEEEDKEAAR	_GAT(ph)PAEDDEDKDIDLFGS(ph)DEEEEDKEAAR_	3	1119.43	147
P26231	Catenin alpha-1	Ctnna1	1	2;3	T	1.52236e-27	S(0.282)RT(0.729)S(0.989)VQT(1)EDDQLIAGQSAR	_SRT(ph)S(ph)VQT(ph)EDDQLIAGQSAR_	2	1151.46	658
Q3TXS7	26S proteasome non-ATPase regulatory subunit 1	Psmd1	1	2	T	2.02498e-44	TASAVAGKT(1)PDAS(1)PEPK	_TASAVAGKT(ph)PDAS(ph)PEPK_	2	893.887	311
Q8BTI8	Serine/arginine repetitive matrix protein 2	Srrm2	1	4	T	1.47904e-14	AQS(1)GT(1)DS(1)S(1)PEHKIPAPR	_AQS(ph)GT(ph)DS(ph)S(ph)PEHKIPAPR_	3	699.921	1574
Q8BTI8	Serine/arginine repetitive matrix protein 2	Srrm2	1	3	T	0.00102557	S(1)LT(1)RS(1)PPAIR	_S(ph)LT(ph)RS(ph)PPAIR_	2	669.274	2021
Q8BTI8	Serine/arginine repetitive matrix protein 2	Srrm2	1	2;3	T	0.014782	S(1)RT(1)PLLPR	_S(ph)RT(ph)PLLPR_	2	550.257	1986
Q8VHR5	Transcriptional repressor p66-beta	Gatad2b	1	4	T	2.2525e-10	GRLT(1)PS(1)PDIIVLS(1)DNEAS(0.059)S(0.941)PR	_GRLT(ph)PS(ph)PDIIVLS(ph)DNEASS(ph)PR_	3	848.679	121
Q924Z4	Ceramide synthase 2	Cers2	1	4	T	8.18476e-45	LIEDERS(1)DREET(1)ES(1)S(1)EGEETAAGAGAK	_LIEDERS(ph)DREET(ph)ES(ph)S(ph)EGEETAAGAGAK_	3	1062.72	346
Q9QYG0	Protein NDRG2	Ndrg2	1	2;3	T	7.53335e-17	S(1)RT(1)AS(1)LTSAASIDGSR	_S(ph)RT(ph)AS(ph)LTSAASIDGSR_	2	910.355	330
A2APC3	Probable tubulin polyglutamylase TTLL9	Ttll9	1	2	Y	0.0385291	QY(1)LAS(1)KHGPK	_QY(ph)LAS(ph)KHGPK_	2	644.778	303
Q3UGX2	Spectrin beta chain, erythrocyte	Spnb1	1	1	Y	0.0505483	ENY(1)HDQKRIIAR	_ENY(ph)HDQKRIIAR_	2	811.894	493
Q8BW45		E330021D16Rik	1	2	Y	0.0360015	QKEGIDY(1)ILLNFS(1)FK	_QKEGIDY(ph)ILLNFS(ph)FK_	2	987.954	264
Q9D478	Outer dense fiber protein 2-like	Odf2l	1	2	Y	0.0476105	VLEKET(1)Y(1)IR	_VLEKET(ph)Y(ph)IR_	2	655.793	155
Q8VDJ3	Vigilin	Hdlbp	0.999999	1	S	2.12474e-23	VATLNS(1)EEENDPPTYK	_VATLNS(ph)EEENDPPTYK_	2	943.906	31
Q9DCL8	Protein phosphatase inhibitor 2	Ppp1r2	0.999999	2	S	1.00358e-27	TREQES(1)S(1)GEEDNDLSPEER	_TREQES(ph)S(ph)GEEDNDLSPEER_	2	1183.94	122
D3Z7Q5	Programmed cell death protein 5	Pdcd5	0.999999	1	S	0.011696	KVMDS(1)DEDDADY	_KVMDS(ph)DEDDADY_	2	741.753	198
P29699	Alpha-2-HS-glycoprotein	Ahsg	0.999999	2;3	S	4.03727e-26	HAFSPVAS(1)VES(1)AS(1)GETLHSPK	_HAFSPVAS(ph)VES(ph)AS(ph)GETLHSPK_	2	1189.48	312
P70441	Na(+)/H(+) exchange regulatory cofactor NHE-RF1	Slc9a3r1	0.999999	2	S	7.78275e-160	SAS(0.999)S(0.001)DTSEELNSQDS(1)PKR	_SAS(ph)SDTSEELNSQDS(ph)PKR_	2	1049.4	297
Q05D44	Eukaryotic translation initiation factor 5B	Eif5b	0.999999	2	S	5.03937e-30	TARPNSEAPLS(1)GS(1)EDADDSNKLSK	_TARPNSEAPLS(ph)GS(ph)EDADDSNKLSK_	3	883.707	139
Q3TQI7	Uncharacterized protein C9orf78 homolog		0.999999	1	S	2.45427e-07	VGDTEKPEPERS(1)PPNR	_VGDTEKPEPERS(ph)PPNR_	3	629.958	261
Q3UJU9	Regulator of microtubule dynamics protein 3	Fam82a2	0.999999	1	S	8.72298e-19	KDS(1)LDLDVEAASSPAAAALEEDDSSGR	_KDS(ph)LDLDVEAASSPAAAALEEDDSSGR_	3	933.745	212
Q5XJE5	RNA polymerase-associated protein LEO1	Leo1	0.999999	1	S	0.00102758	KYVIS(1)DEEEEEDD	_KYVIS(ph)DEEEEEDD_	2	840.314	659
Q61033	Lamina-associated polypeptide 2, isoforms alpha/zeta	Tmpo	0.999999	1;2	S	8.9874e-25	GPPDFS(1)S(1)DEEREPTPVLGSGASVGR	_GPPDFS(ph)S(ph)DEEREPTPVLGSGASVGR_	3	901.716	67
Q8BTI8	Serine/arginine repetitive matrix protein 2	Srrm2	0.999999	3	S	2.41591e-10	RS(0.999)S(0.992)S(0.009)ELS(1)PEVVEK	_RS(ph)S(ph)SELS(ph)PEVVEK_	2	843.825	1343
Q8CGB6	Tensin-like C1 domain-containing phosphatase	Tenc1	0.999999	2	S	1.74608e-22	WDS(1)YENFNQHHEDS(1)VDGALAHTR	_WDS(ph)YENFNQHHEDS(ph)VDGALAHTR_	3	963.375	466
Q9CR86	Calcium-regulated heat stable protein 1	Carhsp1	0.999999	2;3	S	4.27143e-06	DRS(1)PS(1)PLRGNVVPSPLPTR	_DRS(ph)PS(ph)PLRGNVVPSPLPTR_	3	735.691	33
Q7TSC1	Protein PRRC2A	Prrc2a	0.999998	2	S	0.00375727	S(1)EGS(1)EYEEIPKR	_S(ph)EGS(ph)EYEEIPKR_	2	792.305	1087
H7BX95	Serine/arginine-rich splicing factor 1	Srsf1	0.999998	2	S	0.000126445	VKVDGPRS(1)PS(1)YGR	_VKVDGPRS(ph)PS(ph)YGR_	2	789.347	199
P29699	Alpha-2-HS-glycoprotein	Ahsg	0.999998	2;3	S	4.03727e-26	HAFSPVAS(1)VES(1)AS(1)GETLHSPK	_HAFSPVAS(ph)VES(ph)AS(ph)GETLHSPK_	2	1189.48	309
P62754	40S ribosomal protein S6	Rps6	0.999998	3	S	0.00227913	RLS(1)S(1)LRAS(0.749)T(0.211)S(0.039)K	_RLS(ph)S(ph)LRAS(ph)TSK_	2	723.301	236
Q9R0U0	Serine/arginine-rich splicing factor 10	Srsf10	0.999998	2	S	0.00064371	S(1)RS(1)FDYNYR	_S(ph)RS(ph)FDYNYR_	2	684.245	133
Q61033	Lamina-associated polypeptide 2, isoforms alpha/zeta	Tmpo	0.999998	2	S	8.9874e-25	GPPDFS(1)S(1)DEEREPTPVLGSGASVGR	_GPPDFS(ph)S(ph)DEEREPTPVLGSGASVGR_	3	901.716	66
Q62383	Transcription elongation factor SPT6	Supt6h	0.999998	1	S	0.00104481	KMS(1)DDDEDDEEEYGKEEHEK	_KMS(ph)DDDEDDEEEYGKEEHEK_	4	634.985	125
Q6ZQ58	La-related protein 1	Larp1	0.999998	2	S	4.56345e-30	KNTFTAWS(1)EEDS(1)DYEIDDRDVNK	_KNTFTAWS(ph)EEDS(ph)DYEIDDRDVNK_	3	979.721	608
Q8BGD9	Eukaryotic translation initiation factor 4B	Eif4b	0.999998	2	S	0.000193332	ERHPS(1)WRS(0.998)EET(0.002)QER	_ERHPS(ph)WRS(ph)EETQER_	3	662.933	406
Q8C1D8	Protein IWS1 homolog	Iws1	0.999998	2	S	8.39832e-06	AAVLS(1)DS(1)EDDAGNASAKK	_AAVLS(ph)DS(ph)EDDAGNASAKK_	2	954.885	345
Q02780	Nuclear factor 1 A-type	Nfia	0.999997	2	S	0.000183815	LKS(1)VEDEMDS(1)PGEEPFYTGQGR	_LKS(ph)VEDEMDS(ph)PGEEPFYTGQGR_	3	877.683	310
Q61712	DnaJ homolog subfamily C member 1	Dnajc1	0.999997	2	S	3.12388e-06	QKDFDISEQNDS(1)S(1)DEEKQR	_QKDFDISEQNDS(ph)S(ph)DEEKQR_	3	819.986	477
Q61712	DnaJ homolog subfamily C member 1	Dnajc1	0.999997	2	S	3.12388e-06	QKDFDISEQNDS(1)S(1)DEEKQR	_QKDFDISEQNDS(ph)S(ph)DEEKQR_	3	819.986	478
Q6NXI6	Regulation of nuclear pre-mRNA domain-containing protein 2	Rprd2	0.999997	1	S	3.24038e-08	DVEDMELS(1)DVEDDGSK	_DVEDMELS(ph)DVEDDGSK_	2	931.848	392
Q80WJ7	Protein LYRIC	Mtdh	0.999997	1	S	2.72122e-19	SQEPISNDQKVS(1)DDDKEK	_SQEPISNDQKVS(ph)DDDKEK_	3	714.646	423
D6RCX5		Fam54b	0.999996	2	S	0.0254417	S(1)QIAKIVAADAVT(0.5)S(0.5)PRR	_S(ph)QIAKIVAADAVT(ph)SPRR_	2	971.979	137
Q569Z6	Thyroid hormone receptor-associated protein 3	Thrap3	0.999996	2	S	1.90057e-42	ERS(1)PALKS(1)PLQSVVVR	_ERS(ph)PALKS(ph)PLQSVVVR_	2	963.484	253
Q9CQU1	Microfibrillar-associated protein 1	Mfap1	0.999996	2	S	1.81712e-10	RPDYAPMES(1)S(1)DEEDEEFQFIKK	_RPDYAPMES(ph)S(ph)DEEDEEFQFIKK_	3	950.713	52
Q9CQU1	Microfibrillar-associated protein 1	Mfap1	0.999996	2	S	1.81712e-10	RPDYAPMES(1)S(1)DEEDEEFQFIKK	_RPDYAPMES(ph)S(ph)DEEDEEFQFIKK_	3	950.713	53
Q9JIX8	Apoptotic chromatin condensation inducer in the nucleus	Acin1	0.999995	1	S	1.21825e-14	SSSFSEEKGES(1)DDEKPR	_SSSFSEEKGES(ph)DDEKPR_	2	997.405	216
H7BX95	Serine/arginine-rich splicing factor 1	Srsf1	0.999995	2	S	0.000126445	VKVDGPRS(1)PS(1)YGR	_VKVDGPRS(ph)PS(ph)YGR_	2	789.347	201
Q52KI8	Serine/arginine repetitive matrix protein 1	Srrm1	0.999994	3;4	S	0.000187414	GAS(1)AS(1)PQGRQS(0.994)PS(0.659)PS(0.185)T(0.162)RPIR	_GAS(ph)AS(ph)PQGRQS(ph)PS(ph)PSTRPIR_	3	786.313	723
Q8BTI8	Serine/arginine repetitive matrix protein 2	Srrm2	0.999994	3	S	3.0451e-05	NHS(1)GS(1)RT(1)PPVALSSSR	_NHS(ph)GS(ph)RT(ph)PPVALSSSR_	2	946.876	2052
Q9CW46	Ribonucleoprotein PTB-binding 1	Raver1	0.999994	1	S	3.31336e-35	AADVSVTHRPPLS(1)PEAEAEAETPETVDR	_(ac)AADVSVTHRPPLS(ph)PEAEAEAETPETVDR_	3	1032.81	14
Q7TSC1	Protein PRRC2A	Prrc2a	0.999993	2	S	7.50958e-09	S(1)EGS(1)EYEEIPKR	_S(ph)EGS(ph)EYEEIPKR_	2	792.305	1090
Q8CGB6	Tensin-like C1 domain-containing phosphatase	Tenc1	0.999993	2	S	1.74608e-22	WDS(1)YENFNQHHEDS(1)VDGALAHTR	_WDS(ph)YENFNQHHEDS(ph)VDGALAHTR_	3	963.375	455
Q8R5F7	Interferon-induced helicase C domain-containing protein 1	Ifih1	0.999993	1;2	S	2.37289e-44	DSGTMGS(1)DSDESVIQTK	_DSGTMGS(ph)DSDESVIQTK_	2	918.864	289
Q52KI8	Serine/arginine repetitive matrix protein 1	Srrm1	0.999992	3;4	S	0.000187414	GAS(1)AS(1)PQGRQS(0.994)PS(0.659)PS(0.185)T(0.162)RPIR	_GAS(ph)AS(ph)PQGRQS(ph)PS(ph)PSTRPIR_	3	786.313	725
P62996	Transformer-2 protein homolog beta	Tra2b	0.999992	2;3	S	8.74002e-11	RHS(1)HS(1)HS(0.955)PMS(0.021)T(0.024)R	_RHS(ph)HS(ph)HS(ph)PMSTR_	3	553.86	95
Q80U72	Protein scribble homolog	Scrib	0.999992	1	S	0.00743379	NS(1)LESISSIDR	_NS(ph)LESISSIDR_	2	650.793	1206
O55022	Membrane-associated progesterone receptor component 1	Pgrmc1	0.999991	1	S	9.21784e-147	EGEEPTVYS(1)DDEEPKDETAR	_EGEEPTVYS(ph)DDEEPKDETAR_	3	792.651	181
Q3UJU9	Regulator of microtubule dynamics protein 3	Fam82a2	0.999991	2	S	5.32554e-08	S(0.001)HS(0.999)LPNS(1)LDYAQASER	_SHS(ph)LPNS(ph)LDYAQASER_	2	967.888	50
E9Q784		Zc3h13	0.99999	2	S	0.000660582	SKLS(1)PS(0.989)PS(0.011)LR	_SKLS(ph)PS(ph)PSLR_	2	616.278	207
Q05CL8	La-related protein 7	Larp7	0.999988	2	S	4.4633e-21	T(0.12)AS(0.88)EGS(1)EAETPEAPKQPAK	_TAS(ph)EGS(ph)EAETPEAPKQPAK_	2	1044.43	256
Q78ZA7	Nucleosome assembly protein 1-like 4	Nap1l4	0.999988	1	S	1.48133e-68	EFITGDVEPTDAESAWHS(1)ENEEEDK	_EFITGDVEPTDAESAWHS(ph)ENEEEDK_	3	982.061	125
Q8BTI8	Serine/arginine repetitive matrix protein 2	Srrm2	0.999988	3;4	S	2.71567e-09	HAS(1)S(1)S(1)PES(1)LKPTPAPGSR	_HAS(ph)S(ph)S(ph)PES(ph)LKPTPAPGSR_	3	709.265	438
D3Z4V2	Pre-mRNA 3'-end-processing factor FIP1	Fip1l1	0.999987	1;2	S	4.70229e-32	DHS(1)PTPSVFNS(1)DEER	_DHS(ph)PTPSVFNS(ph)DEER_	2	938.843	493
Q9D7S7	60S ribosomal protein L22-like 1	Rpl22l1	0.999987	2	S	0.00346979	YFQISQDEDGS(1)ES(1)ED	_YFQISQDEDGS(ph)ES(ph)ED_	2	954.808	118
Q9D7S7	60S ribosomal protein L22-like 1	Rpl22l1	0.999986	2	S	0.00346979	YFQISQDEDGS(1)ES(1)ED	_YFQISQDEDGS(ph)ES(ph)ED_	2	954.808	120
P35564	Calnexin	Canx	0.999985	1	S	4.31149e-90	SDAEEDGVTGS(1)QDEEDSKPK	_SDAEEDGVTGS(ph)QDEEDSKPK_	2	1101.93	563
P17095	High mobility group protein HMG-I/HMG-Y	Hmga1	0.999982	2	S	6.28572e-28	KLEKEEEEGISQES(1)S(1)EEEQ	_KLEKEEEEGISQES(ph)S(ph)EEEQ_	2	1198.97	102
Q6P542	ATP-binding cassette sub-family F member 1	Abcf1	0.999982	1	S	8.76694e-13	QLSVPAS(1)DEEDEVPAPIPR	_QLSVPAS(ph)DEEDEVPAPIPR_	2	1064.99	107
Q8BTI8	Serine/arginine repetitive matrix protein 2	Srrm2	0.999982	1	S	7.96572e-11	NSGPVSEVNTGFS(1)PEVK	_NSGPVSEVNTGFS(ph)PEVK_	2	914.412	1305
Q9JKB3	DNA-binding protein A	Csda	0.999981	1	S	0.00114588	S(1)RPLNAVSQDGK	_S(ph)RPLNAVSQDGK_	2	676.322	328
Q9QYG0	Protein NDRG2	Ndrg2	0.999981	2;3	S	7.53335e-17	S(1)RT(1)AS(1)LTSAASIDGSR	_S(ph)RT(ph)AS(ph)LTSAASIDGSR_	2	910.355	332
Q923F1		Clns1a	0.999978	1	S	6.75785e-45	LGEESKEPLS(1)DEDEEDNDDVEPISEFR	_LGEESKEPLS(ph)DEDEEDNDDVEPISEFR_	3	1068.11	100
Q8K3A9	7SK snRNA methylphosphate capping enzyme	Mepce	0.999978	2	T	1.30499e-07	ALNAET(1)PKS(0.216)S(0.784)PLPAK	_ALNAET(ph)PKSS(ph)PLPAK_	2	842.391	188
P97310	DNA replication licensing factor MCM2	Mcm2	0.999977	2	S	4.46836e-05	GLLYDS(1)S(1)EEDEERPAR	_GLLYDS(ph)S(ph)EEDEERPAR_	2	1013.4	139
P97310	DNA replication licensing factor MCM2	Mcm2	0.999977	2	S	4.46836e-05	GLLYDS(1)S(1)EEDEERPAR	_GLLYDS(ph)S(ph)EEDEERPAR_	2	1013.4	140
Q9CSN1	SNW domain-containing protein 1	Snw1	0.999976	2	S	0.00132636	GPPS(1)PPAPVMHS(0.979)PS(0.021)RK	_GPPS(ph)PPAPVMHS(ph)PSRK_	2	901.396	224
Q69ZK5	Kelch-like protein 14	Klhl14	0.999975	1	S	0.0257086	VQS(1)VDFMRTDPVCQK	_VQS(ph)VDFMRTDPVCQK_	2	916.907	282
Q60598	Src substrate cortactin	Cttn	0.999975	2;3	T	6.81048e-09	KQT(1)PPAS(0.002)PS(0.049)PQPIEDRPPS(0.496)S(0.449)PIY(0.003)EDAAPFK	_KQT(ph)PPASPSPQPIEDRPPS(ph)SPIYEDAAPFK_	3	1136.52	401
Q8C0N2	Glycerol-3-phosphate acyltransferase 3	Agpat9	0.99997	1	S	1.85791e-06	NSAS(1)VGIIQR	_NSAS(ph)VGIIQR_	2	562.777	68
Q8BTI8	Serine/arginine repetitive matrix protein 2	Srrm2	0.999968	3	S	3.0451e-05	NHS(1)GS(1)RT(1)PPVALSSSR	_NHS(ph)GS(ph)RT(ph)PPVALSSSR_	3	631.587	2054
A2AJI0	MAP7 domain-containing protein 1	Map7d1	0.999965	2;3	S	3.0897e-05	AAEEKEPAAPAS(1)PAPS(0.993)PVPS(0.773)PT(0.234)PAQPQK	_AAEEKEPAAPAS(ph)PAPS(ph)PVPS(ph)PTPAQPQK_	3	997.438	544
Q05D44	Eukaryotic translation initiation factor 5B	Eif5b	0.999965	1	S	1.83604e-10	SVPTVDS(1)GNEDDDSSFK	_SVPTVDS(ph)GNEDDDSSFK_	2	939.867	215
Q8JZQ9	Eukaryotic translation initiation factor 3 subunit B	Eif3b	0.999965	2;3	S	7.74412e-120	AKPAAQSEEETAT(0.035)S(0.965)PAAS(1)PTPQSAER	_AKPAAQSEEETATS(ph)PAAS(ph)PTPQSAER_	2	1386.59	79
Q8C2Q7	Heterogeneous nuclear ribonucleoprotein H	Hnrnph1	0.999964	1	S	2.10239e-08	HTGPNS(1)PDTANDGFVR	_HTGPNS(ph)PDTANDGFVR_	2	882.87	104
Q52KI8	Serine/arginine repetitive matrix protein 1	Srrm1	0.99996	2;3	S	3.38434e-18	KPPAPPS(1)PVQS(0.212)QS(0.788)PSTNWSPAVPAK	_KPPAPPS(ph)PVQSQS(ph)PSTNWSPAVPAK_	3	905.757	810
Q6NZR5		Skiv2l	0.99996	1	S	1.86112e-06	GDNAS(1)PSPSGTPLVR	_GDNAS(ph)PSPSGTPLVR_	2	767.848	240
P62996	Transformer-2 protein homolog beta	Tra2b	0.999954	2;3	S	8.74002e-11	RHS(1)HS(1)HS(0.955)PMS(0.021)T(0.024)R	_RHS(ph)HS(ph)HS(ph)PMSTR_	3	553.86	97
Q8C1D8	Protein IWS1 homolog	Iws1	0.999954	2	S	8.56956e-39	ETTVAS(1)DS(1)EEEAGKEESSVK	_ETTVAS(ph)DS(ph)EEEAGKEESSVK_	2	1136.44	384
P62996	Transformer-2 protein homolog alpha	Tra2a	0.999953	2	S	0.000721036	RRS(1)PS(0.998)PY(0.001)YS(0.001)R	_RRS(ph)PS(ph)PYYSR_	3	476.866	264
Q8BTI8	Serine/arginine repetitive matrix protein 2	Srrm2	0.999949	3	T	3.0451e-05	NHS(1)GS(1)RT(1)PPVALSSSR	_NHS(ph)GS(ph)RT(ph)PPVALSSSR_	3	631.587	2056
Q8BP27	Swi5-dependent recombination DNA repair protein 1 homolog	Sfr1	0.999946	2	S	1.81557e-17	ENPPS(1)PPT(0.015)S(0.985)PAAPQPR	_ENPPS(ph)PPTS(ph)PAAPQPR_	2	901.879	67
Q8VHR5	Transcriptional repressor p66-beta	Gatad2b	0.999946	4	S	2.2525e-10	GRLT(1)PS(1)PDIIVLS(1)DNEAS(0.059)S(0.941)PR	_GRLT(ph)PS(ph)PDIIVLS(ph)DNEASS(ph)PR_	3	848.679	130
Q8K3X4	Interferon regulatory factor 2-binding protein-like	Irf2bpl	0.999944	1	S	0.0109528	KAS(1)PEPPDSAESALK	_KAS(ph)PEPPDSAESALK_	2	803.872	526
Q6PDG5	SWI/SNF complex subunit SMARCC2	Smarcc2	0.999941	1	S	0.0300671	DMDEPS(1)PVPNVEEVTLPK	_DMDEPS(ph)PVPNVEEVTLPK_	2	1038.47	347
Q8BTI8	Serine/arginine repetitive matrix protein 2	Srrm2	0.99994	2	S	0.00239721	S(1)RS(0.882)PQRPGWS(0.118)R	_S(ph)RS(ph)PQRPGWSR_	2	737.311	531
B7ZNX6	Protein LAP2	Erbb2ip	0.999939	2	S	5.29442e-16	HIVNHDDVFEESEELS(1)S(1)DEEMK	_HIVNHDDVFEESEELS(ph)S(ph)DEEMK_	3	926.689	599
Q8BTI8	Serine/arginine repetitive matrix protein 2	Srrm2	0.999939	3	S	0.03675	S(1)RS(1)RT(1)PLIS(0.001)R	_S(ph)RS(ph)RT(ph)PLISR_	2	706.796	1832
E9QMN5	Transcriptional repressor p66 alpha	Gatad2a	0.999937	3	S	0.000381967	RPPS(1)PDVIVLS(0.91)DS(0.09)EQPS(0.183)S(0.817)PR	_RPPS(ph)PDVIVLS(ph)DSEQPSS(ph)PR_	3	801.673	96
Q9CQ73		Pkp2	0.999932	2	S	3.53416e-05	LEIS(1)PDS(0.076)S(0.924)PER	_LEIS(ph)PDSS(ph)PER_	2	695.27	151
Q69ZA1	Cyclin-dependent kinase 13	Cdk13	0.99993	3	S	0.00989814	S(1)LS(1)PLGGRDES(0.982)PVS(0.018)HR	_S(ph)LS(ph)PLGGRDES(ph)PVSHR_	2	967.384	316
Q3UDE2	Tubulin--tyrosine ligase-like protein 12	Ttll12	0.999929	1	S	7.27837e-06	MEIQSGPQPGS(1)PGRAER	_(ac)MEIQSGPQPGS(ph)PGRAER_	2	959.927	11
Q3UJU9	Regulator of microtubule dynamics protein 3	Fam82a2	0.999929	1;2	S	3.36414e-32	SHS(1)LPNSLDYAQASER	_SHS(ph)LPNSLDYAQASER_	2	927.905	46
Q8K019	Bcl-2-associated transcription factor 1	Bclaf1	0.999927	1	S	0.0315531	SIFREES(1)PLR	_SIFREES(ph)PLR_	2	657.316	529
A0JNY3	Gephyrin	Gphn	0.999926	2	S	1.49319e-05	EVHDELEDLPS(1)PPPPLS(0.949)PPPT(0.02)T(0.023)S(0.008)PHK	_EVHDELEDLPS(ph)PPPPLS(ph)PPPTTSPHK_	3	991.782	188
B7ZNX6	Protein LAP2	Erbb2ip	0.999923	2	S	5.29442e-16	HIVNHDDVFEESEELS(1)S(1)DEEMK	_HIVNHDDVFEESEELS(ph)S(ph)DEEMK_	3	926.689	600
Q9JI99	Sphingosine-1-phosphate phosphatase 1	Sgpp1	0.999921	1	S	9.3346e-11	RNS(1)LTGEEGELVK	_RNS(ph)LTGEEGELVK_	2	756.359	101
Q8K019	Bcl-2-associated transcription factor 1	Bclaf1	0.999915	2	S	1.91419e-06	YS(0.974)PS(0.026)QNS(1)PIHHIPSR	_YS(ph)PSQNS(ph)PIHHIPSR_	2	940.398	289
P53986	Monocarboxylate transporter 1	Slc16a1	0.999907	1	S	3.30279e-45	SKES(1)LQEAGKSDANTDLIGGSPK	_SKES(ph)LQEAGKSDANTDLIGGSPK_	3	804.715	213
P70670	Nascent polypeptide-associated complex subunit alpha, muscle-specific form	Naca	0.999905	1	S	3.20313e-63	VQGEAVSNIQENTQTPTVQEES(1)EEEEVDETGVEVK	_VQGEAVSNIQENTQTPTVQEES(ph)EEEEVDETGVEVK_	3	1314.25	2138
O70251	Elongation factor 1-beta	Eef1b	0.999876	1	S	2.37774e-53	YGPSSVEDTTGSGAADAKDDDDIDLFGS(1)DDEEESEEAK	_YGPSSVEDTTGSGAADAKDDDDIDLFGS(ph)DDEEESEEAK_	3	1349.53	106
Q69ZA1	Cyclin-dependent kinase 13	Cdk13	0.999876	3	S	0.00989814	S(1)LS(1)PLGGRDES(0.982)PVS(0.018)HR	_S(ph)LS(ph)PLGGRDES(ph)PVSHR_	2	967.384	318
Q9ESX5	H/ACA ribonucleoprotein complex subunit 4	Dkc1	0.999862	2;3	S	5.95998e-35	KRDS(1)ES(1)ES(1)DETPTVPQLK	_KRDS(ph)ES(ph)ES(ph)DETPTVPQLK_	2	1143.45	455
Q0VBL3		Rbm15	0.999852	2	S	2.04133e-17	S(1)RS(1)PLDKDAYAPSSSVVGTSVGSHR	_S(ph)RS(ph)PLDKDAYAPSSSVVGTSVGSHR_	3	907.407	258
D3YUV1	Nuclear receptor-binding protein	Nrbp1	0.999845	1	S	6.00357e-06	S(1)EGESQTVVSSGSDPK	_(ac)S(ph)EGESQTVVSSGSDPK_	2	858.354	2
A2A5R2		Arfgef2	0.999844	2	S	1.18552e-10	ELEKPMQSKPQS(1)PVIQAT(0.819)AGS(0.181)PK	_ELEKPMQSKPQS(ph)PVIQAT(ph)AGSPK_	3	871.079	218
Q8BII3		D130040H23Rik	0.999839	1	Y	0.043194	YIKEY(1)ILER	_YIKEY(ph)ILER_	2	653.826	103
E9Q5C9		Nolc1	0.999837	1	S	1.16196e-05	GGSISVQVNSVKFDS(1)E	_GGSISVQVNSVKFDS(ph)E_	2	866.893	701
Q52KI8	Serine/arginine repetitive matrix protein 1	Srrm1	0.999836	4	T	2.59964e-10	AKS(1)PT(1)PS(0.037)LS(0.964)PARNS(0.999)DQEGGGK	_AKS(ph)PT(ph)PSLS(ph)PARNS(ph)DQEGGGK_	3	801.972	834
Q52KI8	Serine/arginine repetitive matrix protein 1	Srrm1	0.999831	2	S	0.00136511	RLS(1)PS(0.14)AS(0.86)PPR	_RLS(ph)PSAS(ph)PPR_	2	614.268	387
P39447	Tight junction protein ZO-1	Tjp1	0.999829	2	S	2.6213e-06	DDISEIQS(0.001)LAS(0.999)DHS(1)GR	_DDISEIQSLAS(ph)DHS(ph)GR_	2	945.369	300
Q8BGU5	Cyclin-Y	Ccny	0.999827	1	S	3.56841e-19	SAS(1)ADNLILPR	_SAS(ph)ADNLILPR_	2	618.803	326
Q0VBL3		Rbm15	0.999817	2	S	2.04133e-17	S(1)RS(1)PLDKDAYAPSSSVVGTSVGSHR	_S(ph)RS(ph)PLDKDAYAPSSSVVGTSVGSHR_	3	907.407	256
Q9QYG0	Protein NDRG2	Ndrg2	0.999776	3	S	7.53335e-17	S(0.003)RT(0.997)AS(0.999)LT(0.001)SAAS(1)IDGSR	_SRT(ph)AS(ph)LTSAAS(ph)IDGSR_	2	910.355	338
Q3UHJ0	AP2-associated protein kinase 1	Aak1	0.999776	2	T	0.00193103	VGSLT(1)PPS(0.5)S(0.5)PK	_VGSLT(ph)PPS(ph)SPK_	2	615.264	618
E9PYD5	Transcription elongation factor A protein 1	Tcea1	0.999774	1	S	1.67471e-16	KKEPAISSQNS(1)PEAR	_KKEPAISSQNS(ph)PEAR_	3	574.612	111
Q8BTI8	Serine/arginine repetitive matrix protein 2	Srrm2	0.999753	1	S	6.24946e-07	PSMS(1)PTPLDR	_PSMS(ph)PTPLDR_	2	590.757	2075
Q8BTI8	Serine/arginine repetitive matrix protein 2	Srrm2	0.999744	2	S	4.74117e-26	SSS(1)PVT(0.002)ELT(0.504)ARS(0.493)PVKQDK	_SSS(ph)PVTELT(ph)ARSPVKQDK_	3	697.324	1068
Q58A65	C-Jun-amino-terminal kinase-interacting protein 4	Spag9	0.999722	2	S	5.04449e-23	SAS(1)QS(0.002)S(0.998)LDKLDQELK	_SAS(ph)QSS(ph)LDKLDQELK_	2	904.889	730
Q61233	Plastin-2	Lcp1	0.999715	1	S	1.3242e-14	GS(1)VSDEEMMELR	_GS(ph)VSDEEMMELR_	2	731.783	5
P39447	Tight junction protein ZO-1	Tjp1	0.999708	2	S	9.99476e-13	VQIPVSHPDPEPVS(1)DNEDDS(0.988)Y(0.012)DEEVHDPR	_VQIPVSHPDPEPVS(ph)DNEDDS(ph)YDEEVHDPR_	3	1159.47	125
P29699	Alpha-2-HS-glycoprotein	Ahsg	0.999697	2;3	S	4.03727e-26	HAFSPVAS(1)VES(1)AS(1)GETLHSPK	_HAFSPVAS(ph)VES(ph)AS(ph)GETLHSPK_	2	1189.48	314
E9Q8N8	Electrogenic sodium bicarbonate cotransporter 1	Slc4a4	0.999696	2	S	1.87995e-09	IS(0.01)ENY(0.001)S(0.99)DKS(1)DVENADESSSSILKPLISPAAER	_ISENYS(ph)DKS(ph)DVENADESSSSILKPLISPAAER_	3	1204.54	68
F6WIU1	Protein KRI1 homolog	Kri1	0.99969	3	S	0.00892584	AFVEDS(1)S(1)DEDS(1)AGEGGS(0.001)GLLQK	_AFVEDS(ph)S(ph)DEDS(ph)AGEGGSGLLQK_	3	813.296	177
F6WIU1	Protein KRI1 homolog	Kri1	0.99969	3	S	0.00892584	AFVEDS(1)S(1)DEDS(1)AGEGGS(0.001)GLLQK	_AFVEDS(ph)S(ph)DEDS(ph)AGEGGSGLLQK_	3	813.296	178
F6WIU1	Protein KRI1 homolog	Kri1	0.99969	3	S	0.00892584	AFVEDS(1)S(1)DEDS(1)AGEGGS(0.001)GLLQK	_AFVEDS(ph)S(ph)DEDS(ph)AGEGGSGLLQK_	3	813.296	182
Q8BTI8	Serine/arginine repetitive matrix protein 2	Srrm2	0.99968	3	S	0.03675	S(1)RS(1)RT(1)PLIS(0.001)R	_S(ph)RS(ph)RT(ph)PLISR_	2	706.796	1834
Q8BTI8	Serine/arginine repetitive matrix protein 2	Srrm2	0.999656	2	S	0.0109752	S(0.003)LS(0.995)Y(0.003)S(1)PVER	_SLS(ph)YS(ph)PVER_	2	599.233	2648
Q9JI10	Serine/threonine-protein kinase 3	Stk3	0.999651	1	S	2.23926e-06	ELEEEEENS(1)DEDELDSHTMVK	_ELEEEEENS(ph)DEDELDSHTMVK_	3	863.002	316
P52479	Ubiquitin carboxyl-terminal hydrolase 10	Usp10	0.999585	1	S	2.11987e-52	SDLIEDEELEDTGKGS(1)EDEWEQVGPK	_SDLIEDEELEDTGKGS(ph)EDEWEQVGPK_	3	1005.43	570
Q7TNS2	Mitochondrial inner membrane organizing system protein 1	Minos1	0.999582	1	S	0.0409765	SES(1)ELGRKWDR	_(ac)SES(ph)ELGRKWDR_	2	742.83	4
D3Z7R7	Minor histocompatibility protein HA-1	Hmha1	0.99957	1	S	8.21338e-06	KGS(1)FNPGDASGPEAAGSPPEEGGTSEAAPNKDHR	_KGS(ph)FNPGDASGPEAAGSPPEEGGTSEAAPNKDHR_	4	851.122	588
Q3B7Z2	Oxysterol-binding protein 1	Osbp	0.999564	2	S	2.35372e-09	T(0.5)GS(0.5)NIS(1)GASSDVSLDEQYK	_T(ph)GSNIS(ph)GASSDVSLDEQYK_	2	1059.42	380
G5E8U9	BCL2/adenovirus E1B 19 kDa protein-interacting protein 2	Bnip2	0.999539	1	S	3.47921e-06	KGS(1)ITEYTATEEK	_KGS(ph)ITEYTATEEK_	2	768.845	114
O54774	AP-3 complex subunit delta-1	Ap3d1	0.999513	1;2	S	1.51642e-121	HS(0.007)S(0.993)LPTES(1)DEDIAPAQR	_HSS(ph)LPTES(ph)DEDIAPAQR_	2	1006.9	760
Q52KE7	Cyclin-L1	Ccnl1	0.999513	1	S	0.00110563	AEEKS(1)PVSINVK	_AEEKS(ph)PVSINVK_	2	690.842	358
G3X8X0		Dhx16	0.99951	2	S	0.00149112	AGGS(0.182)KS(0.752)PT(0.067)EEKPAS(1)EDEWER	_AGGSKS(ph)PTEEKPAS(ph)EDEWER_	3	783.981	163
Q8R502	Leucine-rich repeat-containing protein 8C	Lrrc8c	0.999493	2	S	0.0353983	S(0.244)QS(0.757)LKS(0.999)IPEK	_SQS(ph)LKS(ph)IPEK_	2	638.783	215
Q64012	RNA-binding protein Raly	Raly	0.999458	2	T	0.00953844	LPAPQEDT(0.228)AS(0.772)EAGT(0.999)PQGEVQTR	_LPAPQEDTAS(ph)EAGT(ph)PQGEVQTR_	3	814.679	274
B2RXQ2		Ppfia1	0.999441	2	S	4.82882e-07	RS(0.013)S(0.987)DGS(0.999)LS(0.001)HEDLAK	_RSS(ph)DGS(ph)LSHEDLAK_	2	831.332	242
P27546	Microtubule-associated protein 4	Map4	0.999418	1	S	0.00387625	DMS(0.999)PS(0.001)AETEAPLAK	_DMS(ph)PSAETEAPLAK_	2	763.826	517
G5E8I8	Calcium homeostasis endoplasmic reticulum protein	Cherp	0.999395	4	S	5.00735e-05	S(0.999)RS(0.999)RS(0.998)PT(0.945)PPS(0.059)AAGLGSNSAPPIPDSR	_S(ph)RS(ph)RS(ph)PT(ph)PPSAAGLGSNSAPPIPDSR_	3	961.394	824
P70441	Na(+)/H(+) exchange regulatory cofactor NHE-RF1	Slc9a3r1	0.999364	1;2	S	7.78275e-160	SAS(0.999)S(0.001)DTSEELNSQDS(1)PKR	_SAS(ph)SDTSEELNSQDS(ph)PKR_	2	1049.4	285
Q9D4C5	ELL-associated factor 1	Eaf1	0.999319	2	S	0.00128137	T(0.5)S(0.5)PLKDNPS(0.999)PEPQLDDIKR	_T(ph)SPLKDNPS(ph)PEPQLDDIKR_	3	770.685	165
Q5EBP8	Heterogeneous nuclear ribonucleoprotein A1	Hnrnpa1	0.999302	2	S	1.6372e-07	S(0.048)KS(0.953)ES(0.999)PKEPEQLR	_(ac)SKS(ph)ES(ph)PKEPEQLR_	2	858.866	6
Q52KI8	Serine/arginine repetitive matrix protein 1	Srrm1	0.999293	4	S	2.59964e-10	AKS(1)PT(1)PS(0.037)LS(0.964)PARNS(0.999)DQEGGGK	_AKS(ph)PT(ph)PSLS(ph)PARNS(ph)DQEGGGK_	3	801.972	843
Q99KG5	Lipolysis-stimulated lipoprotein receptor	Lsr	0.999289	1	S	0.0142941	S(0.999)RDDLY(0.001)DPDDPR	_S(ph)RDDLYDPDDPR_	2	772.307	473
Q9CQU3	Protein RER1	Rer1	0.999278	1	S	3.07245e-11	VDPSLMEDS(0.999)DDGPS(0.001)LPTK	_VDPSLMEDS(ph)DDGPSLPTK_	2	991.919	95
Q9D3L3	Synaptosomal-associated protein	Snap23	0.999235	1	S	1.18262e-25	ATWGDGGDNS(0.999)PS(0.001)NVVSK	_ATWGDGGDNS(ph)PSNVVSK_	2	885.87	121
Q9ESX5	H/ACA ribonucleoprotein complex subunit 4	Dkc1	0.999228	1	S	3.0856e-08	TVLES(0.999)GGET(0.001)GDGDNDTTK	_TVLES(ph)GGETGDGDNDTTK_	2	938.378	481
P39447	Tight junction protein ZO-1	Tjp1	0.999223	2	S	2.6213e-06	DDISEIQS(0.001)LAS(0.999)DHS(1)GR	_DDISEIQSLAS(ph)DHS(ph)GR_	2	945.369	297
Q9JMH9	Unconventional myosin-XVIIIa	Myo18a	0.999172	2	S	3.83737e-08	S(0.008)S(0.008)S(0.896)PT(0.044)S(0.044)HWKPLAPDPS(0.999)DDEHDPVDS(0.001)ISRPR	_SSS(ph)PTSHWKPLAPDPS(ph)DDEHDPVDSISRPR_	4	868.877	2016
Q80U72	Protein scribble homolog	Scrib	0.999135	2	T	1.74134e-06	AHEEEEEEEEENRDEEEGEAT(0.999)T(0.999)EEDDKEEAVAS(0.002)APSVK	_AHEEEEEEEEENRDEEEGEAT(ph)T(ph)EEDDKEEAVASAPSVK_	4	1116.93	674
Q80U72	Protein scribble homolog	Scrib	0.999135	2	T	1.74134e-06	AHEEEEEEEEENRDEEEGEAT(0.999)T(0.999)EEDDKEEAVAS(0.002)APSVK	_AHEEEEEEEEENRDEEEGEAT(ph)T(ph)EEDDKEEAVASAPSVK_	4	1116.93	675
Q3B7Z2	Oxysterol-binding protein 1	Osbp	0.999121	2	S	7.26954e-19	MLAES(1)DDS(0.999)GDEES(0.001)VSQTDKTELQSTLR	_MLAES(ph)DDS(ph)GDEESVSQTDKTELQSTLR_	3	1044.43	191
Q64213	Splicing factor 1	Sf1	0.999119	2	S	7.43446e-18	TGDLGIPPNPEDRS(0.999)PS(0.995)PEPIY(0.002)NS(0.004)EGK	_TGDLGIPPNPEDRS(ph)PS(ph)PEPIYNSEGK_	3	976.09	80
Q91Y97	Fructose-bisphosphate aldolase B	Aldob	0.999103	1	T	2.2091e-15	GILAADES(0.001)VGT(0.999)MGNR	_GILAADESVGT(ph)MGNR_	2	785.85	39
Q3U0S6	Ras-interacting protein 1	Rasip1	0.999016	2	S	0.00602638	S(0.001)VS(0.999)ELS(1)LQGR	_SVS(ph)ELS(ph)LQGR_	2	618.257	322
Q8BTI8	Serine/arginine repetitive matrix protein 2	Srrm2	0.998946	3	S	2.41591e-10	RS(0.999)S(0.992)S(0.009)ELS(1)PEVVEK	_RS(ph)S(ph)SELS(ph)PEVVEK_	2	843.825	1338
Q9JIX8	Apoptotic chromatin condensation inducer in the nucleus	Acin1	0.998937	2	S	1.89535e-12	S(0.005)LS(0.995)PLS(0.001)GTTDT(0.001)KAES(0.999)PAGR	_SLS(ph)PLSGTTDTKAES(ph)PAGR_	2	1017.94	491
G5E8I8	Calcium homeostasis endoplasmic reticulum protein	Cherp	0.998883	4	S	5.00735e-05	S(0.999)RS(0.999)RS(0.998)PT(0.945)PPS(0.059)AAGLGSNSAPPIPDSR	_S(ph)RS(ph)RS(ph)PT(ph)PPSAAGLGSNSAPPIPDSR_	3	961.394	826
Q5U3K5	Rab-like protein 1	Parf	0.998816	2	S	4.32705e-11	NIS(0.018)LS(0.983)S(0.999)EEEAEGLAGHPR	_NISLS(ph)S(ph)EEEAEGLAGHPR_	2	1028.42	483
O35344	Importin subunit alpha-3	Kpna3	0.998807	1	S	1.90992e-14	NVPQEES(0.001)LEDS(0.999)DVDADFK	_NVPQEESLEDS(ph)DVDADFK_	2	1058.93	60
F8VPU2		Farp1	0.998761	1;3	S	8.1697e-49	SPDEATAADQES(0.999)EDDLS(0.001)AS(0.001)R	_SPDEATAADQES(ph)EDDLSASR_	2	1087.42	892
Q8BTI8	Serine/arginine repetitive matrix protein 2	Srrm2	0.998745	2	S	4.74117e-26	S(0.185)S(0.185)S(0.63)PVTELT(0.001)ARS(0.999)PVKQDK	_SSS(ph)PVTELTARS(ph)PVKQDK_	2	1045.48	1077
Q8R5F7	Interferon-induced helicase C domain-containing protein 1	Ifih1	0.998726	2	S	4.08184e-08	DSGTMGS(1)DS(0.999)DES(0.001)VIQTK	_DSGTMGS(ph)DS(ph)DESVIQTK_	2	958.847	291
Q9Z0U1	Tight junction protein ZO-2	Tjp2	0.998566	1	S	0.00282075	GS(0.001)YGS(0.999)DPEEEEYR	_GSYGS(ph)DPEEEEYR_	2	799.288	1136
Q6ZPR6	Inhibitor of Bruton tyrosine kinase	Ibtk	0.998548	1	S	0.000997495	DLQS(0.999)PDFT(0.001)AGFHSDKVEGK	_DLQS(ph)PDFTAGFHSDKVEGK_	3	719.988	1046
P53569	CCAAT/enhancer-binding protein zeta	Cebpz	0.998542	2	S	1.10966e-11	S(0.001)QLDDHPES(0.999)DEENFVDVGDDS(0.814)DDEKFT(0.179)DADKGT(0.006)AT(0.001)DAVK	_SQLDDHPES(ph)DEENFVDVGDDS(ph)DDEKFTDADKGTATDAVK_	4	1104.94	629
P62996	Transformer-2 protein homolog alpha	Tra2a	0.998486	2	S	0.0300048	RRS(1)PS(0.998)PY(0.001)YS(0.001)R	_RRS(ph)PS(ph)PYYSR_	3	476.866	266
Q9QZS3	Protein numb homolog	Numb	0.998312	1	S	0.000753536	T(0.001)NPS(0.998)PTNPFSSDLQK	_TNPS(ph)PTNPFSSDLQK_	2	856.88	636
P58871	182 kDa tankyrase-1-binding protein	Tnks1bp1	0.998204	1	S	4.60902e-11	GYS(0.998)S(0.002)QDAEEQDREFEKR	_GYS(ph)SQDAEEQDREFEKR_	3	718.631	911
Q8BGD9	Eukaryotic translation initiation factor 4B	Eif4b	0.998073	2	S	0.000193332	ERHPS(1)WRS(0.998)EET(0.002)QER	_ERHPS(ph)WRS(ph)EETQER_	3	662.933	409
F6WIU1	Protein KRI1 homolog	Kri1	0.998012	1	S	3.13894e-16	YVDEDNS(0.998)DGET(0.002)VDHR	_YVDEDNS(ph)DGETVDHR_	2	915.844	142
Q8C079	Protein FAM40A	Fam40a	0.997981	1	S	0.00113435	AAS(0.998)PPAS(0.002)ASDLIEQQQK	_AAS(ph)PPASASDLIEQQQK_	2	910.925	335
G5E8I8	Calcium homeostasis endoplasmic reticulum protein	Cherp	0.99792	4	S	5.00735e-05	S(0.999)RS(0.999)RS(0.998)PT(0.945)PPS(0.059)AAGLGSNSAPPIPDSR	_S(ph)RS(ph)RS(ph)PT(ph)PPSAAGLGSNSAPPIPDSR_	3	961.394	828
Q58A65	C-Jun-amino-terminal kinase-interacting protein 4	Spag9	0.997919	2	S	5.04449e-23	SAS(1)QS(0.002)S(0.998)LDKLDQELK	_SAS(ph)QSS(ph)LDKLDQELK_	2	904.889	733
Q9QXY1	Tight junction protein ZO-3	Tjp3	0.997905	1	S	1.37121e-15	ASPAS(0.002)GHQLS(0.998)DQEEADHGR	_ASPASGHQLS(ph)DQEEADHGR_	3	691.287	111
Q62018	RNA polymerase-associated protein CTR9 homolog	Ctr9	0.997879	1	T	0.00114806	KGGEFDEFVNDDT(0.998)DDDLPVS(0.002)K	_KGGEFDEFVNDDT(ph)DDDLPVSK_	3	808.004	925
Q6DVA0	LEM domain-containing protein 2	Lemd2	0.997847	2	S	8.00573e-06	AS(0.045)VRGS(0.957)S(0.998)EDDEDTRTPDR	_ASVRGS(ph)S(ph)EDDEDTRTPDR_	3	718.278	150
Q8VCE2	GPN-loop GTPase 1	Gpn1	0.997594	1	S	5.52159e-61	GTLDEEDEEADS(0.998)DT(0.002)DDIDHR	_GTLDEEDEEADS(ph)DTDDIDHR_	2	1178.93	338
E9Q983	Supervillin	Svil	0.997456	2	S	0.000236151	S(0.003)IS(0.997)FPEVPRS(1)PK	_SIS(ph)FPEVPRS(ph)PK_	2	752.336	220
Q8K019	Bcl-2-associated transcription factor 1	Bclaf1	0.997364	1	S	0.00638903	IDIS(0.997)PS(0.003)ALR	_IDIS(ph)PSALR_	2	526.263	656
A2AH85	116 kDa U5 small nuclear ribonucleoprotein component	Eftud2	0.997256	1	S	4.98172e-05	MDTDLY(0.001)DEFGNY(0.002)IGPELDS(0.997)DEDDDELGR	_(ac)M(ox)DTDLYDEFGNYIGPELDS(ph)DEDDDELGR_	3	1126.1	19
Q8K019	Bcl-2-associated transcription factor 1	Bclaf1	0.997226	1	S	3.25711e-16	GRADGDWDDQEVLDYFS(0.997)DKES(0.002)AK	_GRADGDWDDQEVLDYFS(ph)DKESAK_	3	909.38	383
Q9QZI8	Serine incorporator 1	Serinc1	0.997216	1	S	0.000211811	S(0.003)DGS(0.997)LDDGDGIHR	_SDGS(ph)LDDGDGIHR_	2	712.278	364
P70302	Stromal interaction molecule 1	Stim1	0.9972	2	S	5.34268e-08	DLTHSDS(0.997)ES(0.321)S(0.682)LHMSDR	_DLTHSDS(ph)ESS(ph)LHMSDR_	2	988.858	521
Q9ERG0	LIM domain and actin-binding protein 1	Lima1	0.997198	1	S	9.46465e-09	SDNEETLGRPAQPPNAGES(0.003)PHS(0.997)PGVEDAPIAK	_SDNEETLGRPAQPPNAGESPHS(ph)PGVEDAPIAK_	3	1116.51	488
Q569Z6	Thyroid hormone receptor-associated protein 3	Thrap3	0.99696	1	S	0.0144893	IDIS(0.997)PS(0.002)T(0.002)FR	_IDIS(ph)PSTFR_	2	558.26	679
P43276	Histone H1.5	Hist1h1b	0.996908	1	S	1.06244e-09	SETAPAET(0.003)AAPAPVEKS(0.997)PAK	_(ac)SETAPAETAAPAPVEKS(ph)PAK_	2	1037.49	18
Q148V8	Protein FAM83H	Fam83h	0.996843	1	S	0.0147558	KGS(0.997)PT(0.003)PAYPER	_KGS(ph)PTPAYPER_	2	641.795	871
P35123	Ubiquitin carboxyl-terminal hydrolase 4	Usp4	0.996696	2	S	0.00107114	SSYEGDEEEEMDHQEEGKEQLS(0.997)EVEGS(0.995)GEDDQGDDHS(0.006)ES(0.002)AQK	_SSYEGDEEEEMDHQEEGKEQLS(ph)EVEGS(ph)GEDDQGDDHSESAQK_	4	1211.94	675
Q52KI8	Serine/arginine repetitive matrix protein 1	Srrm1	0.996331	3	S	3.38434e-18	KPPAPPS(1)PVQS(0.001)QS(0.926)PS(0.038)T(0.038)NWS(0.996)PAVPAKK	_KPPAPPS(ph)PVQSQS(ph)PSTNWS(ph)PAVPAKK_	3	975.111	822
Q6ZQ58	La-related protein 1	Larp1	0.996217	2	S	0.00201669	S(0.77)LPT(0.074)T(0.156)VPES(0.996)PNY(0.004)R	_S(ph)LPTTVPES(ph)PNYR_	2	810.839	751
Q9JMH9	Unconventional myosin-XVIIIa	Myo18a	0.996022	2	S	5.09038e-05	FSHS(0.001)YLS(0.996)DS(0.95)DT(0.053)EAK	_FSHSYLS(ph)DS(ph)DTEAK_	2	873.818	2037
A2A7S8	Uncharacterized protein KIAA1522	Kiaa1522	0.995876	1	S	4.47713e-26	GS(0.996)PS(0.004)GGSTAETSDTASIR	_GS(ph)PSGGSTAETSDTASIR_	2	880.87	402
Q8VCS9	Transporter	Slc6a12	0.99586	2	S	0.037489	AWEERAS(0.996)LS(0.191)S(0.813)MDRK	_AWEERAS(ph)LSS(ph)MDRK_	3	609.25	11
Q91Y97	Fructose-bisphosphate aldolase B	Aldob	0.995716	1	S	7.72372e-16	GILAADES(0.996)VGT(0.004)MGNR	_GILAADES(ph)VGTMGNR_	2	785.85	36
E9QN52	Leucine-rich repeat flightless-interacting protein 2	Lrrfip2	0.995687	1	S	1.51715e-06	RGS(0.996)GDT(0.004)SSLIDPDTSLSELR	_RGS(ph)GDTSSLIDPDTSLSELR_	2	1093.5	111
E9Q8N8	Electrogenic sodium bicarbonate cotransporter 1	Slc4a4	0.995412	2	T	1.19695e-13	NLT(0.995)S(0.005)S(0.006)S(0.994)LNDISDKPEK	_NLT(ph)SSS(ph)LNDISDKPEK_	2	954.405	254
P35123	Ubiquitin carboxyl-terminal hydrolase 4	Usp4	0.995018	1;2	S	6.79822e-07	SSYEGDEEEEMDHQEEGKEQLS(0.997)EVEGS(0.995)GEDDQGDDHS(0.006)ES(0.002)AQK	_SSYEGDEEEEMDHQEEGKEQLS(ph)EVEGS(ph)GEDDQGDDHSESAQK_	4	1211.94	680
Q64213	Splicing factor 1	Sf1	0.99495	2	S	7.43446e-18	TGDLGIPPNPEDRS(0.999)PS(0.995)PEPIY(0.002)NS(0.004)EGK	_TGDLGIPPNPEDRS(ph)PS(ph)PEPIYNSEGK_	3	976.09	82
Q9ERU9	E3 SUMO-protein ligase RanBP2	Ranbp2	0.994703	1	S	1.55176e-09	NRPGY(0.005)VS(0.995)EEEEDDEDYEMAVK	_NRPGYVS(ph)EEEEDDEDYEMAVK_	3	862.007	2505
F8VQK5	SAM and SH3 domain-containing protein 1	Sash1	0.994572	1	S	8.84401e-08	S(0.005)HS(0.995)LDDLQGDADVGK	_SHS(ph)LDDLQGDADVGK_	2	818.846	831
Q5U3K5	Rab-like protein 1	Parf	0.994569	2	S	4.32705e-11	NIS(0.008)LS(0.995)S(0.998)EEEAEGLAGHPR	_NISLS(ph)S(ph)EEEAEGLAGHPR_	3	685.952	482
Q8BTI8	Serine/arginine repetitive matrix protein 2	Srrm2	0.994565	2	S	0.0109752	S(0.003)LS(0.995)Y(0.003)S(1)PVER	_SLS(ph)YS(ph)PVER_	2	599.233	2646
Q9JIX8	Apoptotic chromatin condensation inducer in the nucleus	Acin1	0.99455	2	S	1.89535e-12	S(0.005)LS(0.995)PLS(0.001)GTTDT(0.001)KAES(0.999)PAGR	_SLS(ph)PLSGTTDTKAES(ph)PAGR_	2	1017.94	479
Q52KI8	Serine/arginine repetitive matrix protein 1	Srrm1	0.99437	3;4	S	0.000187414	GAS(1)AS(1)PQGRQS(0.994)PS(0.659)PS(0.185)T(0.162)RPIR	_GAS(ph)AS(ph)PQGRQS(ph)PS(ph)PSTRPIR_	3	786.313	731
O55003	BCL2/adenovirus E1B 19 kDa protein-interacting protein 3	Bnip3	0.993888	1;2;3	S	7.64311e-45	AEIDSHSFGEKNS(0.795)T(0.211)LS(0.994)EEDYIER	_AEIDSHSFGEKNS(ph)TLS(ph)EEDYIER_	3	939.383	88
E9Q8N8	Electrogenic sodium bicarbonate cotransporter 1	Slc4a4	0.993873	1;2	S	2.37528e-30	NLT(0.995)S(0.005)S(0.006)S(0.994)LNDISDKPEK	_NLT(ph)SSS(ph)LNDISDKPEK_	2	954.405	257
A2AIX1		Sec16a	0.993655	2	S	2.12997e-34	GS(0.994)PVRHS(0.987)PPELS(0.019)QEEFGESFADPGSSR	_GS(ph)PVRHS(ph)PPELSQEEFGESFADPGSSR_	3	1016.09	2053
E9QNN1		Dhx9	0.993608	1	S	9.65877e-37	AEAENNSGVESSGYGS(0.994)PGPT(0.006)WDR	_AEAENNSGVESSGYGS(ph)PGPTWDR_	2	1223.99	137
O54774	AP-3 complex subunit delta-1	Ap3d1	0.993183	2	S	2.49684e-19	HS(0.007)S(0.993)LPTES(1)DEDIAPAQR	_HSS(ph)LPTES(ph)DEDIAPAQR_	2	1006.9	755
A2AJI0	MAP7 domain-containing protein 1	Map7d1	0.992861	2;3	S	3.0897e-05	AAEEKEPAAPAS(1)PAPS(0.993)PVPS(0.773)PT(0.234)PAQPQK	_AAEEKEPAAPAS(ph)PAPS(ph)PVPS(ph)PTPAQPQK_	3	997.438	548
Q02819	Nucleobindin-1	Nucb1	0.992795	1	S	4.77845e-05	S(0.007)GKLS(0.993)QELDFVSHNVR	_SGKLS(ph)QELDFVSHNVR_	3	632.639	85
P18608	Non-histone chromosomal protein HMG-14	Hmgn1	0.992671	2	S	1.39829e-09	QADVADQQTTELPAENGET(0.7)ENQS(0.307)PAS(0.993)EEEKEAK	_QADVADQQTTELPAENGET(ph)ENQSPAS(ph)EEEKEAK_	3	1245.18	87
Q8K019	Bcl-2-associated transcription factor 1	Bclaf1	0.992576	2	T	3.24211e-08	FHDS(1)EGDDT(0.993)EET(0.007)EDYR	_FHDS(ph)EGDDT(ph)EETEDYR_	2	1052.84	400
Q6ZQ58	La-related protein 1	Larp1	0.992205	1;2	S	1.09369e-06	VEPAWHDQDET(0.001)S(0.002)S(0.005)VKS(0.992)DGAGGAR	_VEPAWHDQDETSSVKS(ph)DGAGGAR_	3	827.022	302
Q8BTI8	Serine/arginine repetitive matrix protein 2	Srrm2	0.991602	3	S	2.41591e-10	RS(0.999)S(0.992)S(0.009)ELS(1)PEVVEK	_RS(ph)S(ph)SELS(ph)PEVVEK_	2	843.825	1339
Q9D6Z1	Nucleolar protein 56	Nop56	0.991543	2;3	S	5.08786e-50	SSPKEEVAS(1)EPEEAAS(0.992)PT(0.007)T(0.001)PK	_SSPKEEVAS(ph)EPEEAAS(ph)PTTPK_	2	1165.99	543
O35601	FYN-binding protein	Fyb	0.99149	1	S	5.80882e-17	HPINDENQDGVMHSDGTGNLEEEQES(0.991)EGET(0.007)Y(0.001)EDIDSSK	_HPINDENQDGVMHSDGTGNLEEEQES(ph)EGETYEDIDSSK_	4	1079.43	445
A2A841	Protein 4.1	Epb4.1	0.991073	2	S	0.0231008	RAS(0.991)RS(0.969)LDGAAAAES(0.021)T(0.019)DR	_RAS(ph)RS(ph)LDGAAAAESTDR_	2	947.396	566
Q9R0P4	Small acidic protein	Smap	0.990851	1	S	3.63585e-67	S(0.009)AS(0.991)PDDDLGSSNWEAADLGNEER	_SAS(ph)PDDDLGSSNWEAADLGNEER_	2	1258	17
Q62261	Spectrin beta chain, brain 1	Sptbn1	0.990825	3	S	2.32569e-26	T(0.077)S(0.098)S(0.825)KES(0.024)S(0.976)PVPS(0.991)PT(0.009)LDRK	_TSS(ph)KESS(ph)PVPS(ph)PTLDRK_	2	1028.43	2168
Q3UVT7	Palmdelphin	Palmd	0.989899	2	S	0.00702349	MELS(0.99)PS(0.144)RAS(0.866)PGK	_MELS(ph)PSRAS(ph)PGK_	2	710.291	370
E9Q8N8	Electrogenic sodium bicarbonate cotransporter 1	Slc4a4	0.989701	2	S	1.87995e-09	IS(0.01)ENY(0.001)S(0.99)DKS(1)DVENADESSSSILKPLISPAAER	_ISENYS(ph)DKS(ph)DVENADESSSSILKPLISPAAER_	3	1204.54	65
Q3TWW8		Srsf6	0.989421	4	S	0.0138224	S(0.346)RS(0.883)QS(0.897)RS(0.883)HS(0.989)PLPAPPS(0.001)K	_SRS(ph)QS(ph)RS(ph)HS(ph)PLPAPPSK_	3	713.612	303
E9Q784		Zc3h13	0.989031	2	S	0.000660582	SKLS(1)PS(0.989)PS(0.011)LR	_SKLS(ph)PS(ph)PSLR_	2	616.278	209
P26231	Catenin alpha-1	Ctnna1	0.988923	1;2;3	S	1.52236e-27	S(0.282)RT(0.729)S(0.989)VQT(1)EDDQLIAGQSAR	_SRT(ph)S(ph)VQT(ph)EDDQLIAGQSAR_	2	1151.46	655
Q9CR86	Calcium-regulated heat stable protein 1	Carhsp1	0.98872	3	S	0.00789749	DRS(1)PS(1)PLRGNVVPS(0.989)PLPT(0.011)R	_DRS(ph)PS(ph)PLRGNVVPS(ph)PLPTR_	3	762.346	42
P26231	Catenin alpha-1	Ctnna1	0.988554	2	S	5.36212e-16	S(0.989)RT(0.457)S(0.555)VQTEDDQLIAGQSAR	_S(ph)RTS(ph)VQTEDDQLIAGQSAR_	2	1111.48	652
A2A5R2		Arfgef2	0.988269	1	S	4.2787e-16	ELEKPMQSKPQSPVIQAT(0.012)AGS(0.988)PK	_ELEKPMQSKPQSPVIQATAGS(ph)PK_	3	844.424	227
P39447	Tight junction protein ZO-1	Tjp1	0.987974	2	S	9.99476e-13	VQIPVSHPDPEPVS(1)DNEDDS(0.988)Y(0.012)DEEVHDPR	_VQIPVSHPDPEPVS(ph)DNEDDS(ph)YDEEVHDPR_	3	1159.47	131
A2AIX1		Sec16a	0.987017	2	S	2.12997e-34	GS(0.994)PVRHS(0.987)PPELS(0.019)QEEFGESFADPGSSR	_GS(ph)PVRHS(ph)PPELSQEEFGESFADPGSSR_	3	1016.09	2058
B2RXQ2		Ppfia1	0.986945	2	S	4.82882e-07	RS(0.013)S(0.987)DGS(0.999)LS(0.001)HEDLAK	_RSS(ph)DGS(ph)LSHEDLAK_	2	831.332	239
E9Q5W5	Zinc finger ZZ-type and EF-hand domain-containing protein 1	Zzef1	0.986919	1	S	0.000484798	S(0.987)MEET(0.013)RPVPTVK	_S(ph)MEETRPVPTVK_	2	727.341	1538
Q52KI8	Serine/arginine repetitive matrix protein 1	Srrm1	0.985366	2;3	S	3.38434e-18	KPPAPPS(0.999)PVQS(0.006)QS(0.985)PS(0.155)T(0.088)NWS(0.768)PAVPAK	_KPPAPPS(ph)PVQSQS(ph)PSTNWS(ph)PAVPAK_	3	932.413	816
Q8BP27	Swi5-dependent recombination DNA repair protein 1 homolog	Sfr1	0.984896	2	S	1.81557e-17	ENPPS(1)PPT(0.015)S(0.985)PAAPQPR	_ENPPS(ph)PPTS(ph)PAAPQPR_	2	901.879	71
P62908	40S ribosomal protein S3	Rps3	0.983676	1	T	0.00135489	DEILPT(0.007)T(0.984)PIS(0.009)EQK	_DEILPTT(ph)PISEQK_	2	775.871	221
G5E896	Enhancer of mRNA-decapping protein 4	Edc4	0.983518	1	S	2.49973e-08	DSQDTS(0.005)AEQS(0.984)DHDDEVAS(0.01)LASASGGFGSK	_DSQDTSAEQS(ph)DHDDEVASLASASGGFGSK_	3	993.398	884
Q62261	Spectrin beta chain, brain 1	Sptbn1	0.983168	3	S	2.32569e-26	T(0.007)S(0.01)S(0.983)KES(0.374)S(0.626)PVPS(0.965)PT(0.035)LDR	_TSS(ph)KESS(ph)PVPS(ph)PTLDR_	2	964.378	2160
Q6Y7W8	PERQ amino acid-rich with GYF domain-containing protein 2	Gigyf2	0.982714	3	S	0.0301122	ALS(0.278)S(0.316)GGS(0.408)IT(0.207)S(0.809)PPLS(0.983)PALPK	_ALSSGGS(ph)ITS(ph)PPLS(ph)PALPK_	2	1010.45	30
E9QKI4	Proline-rich AKT1 substrate 1	Akt1s1	0.982664	3	S	2.41268e-07	T(0.035)EARS(0.983)S(0.983)DEENGPPS(0.198)S(0.802)PDLDR	_TEARS(ph)S(ph)DEENGPPSS(ph)PDLDR_	3	800.287	274
E9QKI4	Proline-rich AKT1 substrate 1	Akt1s1	0.982664	2;3	S	2.41268e-07	T(0.035)EARS(0.983)S(0.983)DEENGPPS(0.198)S(0.802)PDLDR	_TEARS(ph)S(ph)DEENGPPSS(ph)PDLDR_	3	800.287	275
P62960	Nuclease-sensitive element-binding protein 1	Ybx1	0.982336	1	S	1.60485e-47	NYQQNYQNS(0.982)ES(0.018)GEKNEGSESAPEGQAQQR	_NYQQNYQNS(ph)ESGEKNEGSESAPEGQAQQR_	3	1113.13	163
P47811	Mitogen-activated protein kinase 14	Mapk14	0.98194	1	Y	0.00423758	HTDDEMT(0.006)GY(0.982)VAT(0.012)R	_HTDDEMTGY(ph)VATR_	3	525.876	182
Q69ZA1	Cyclin-dependent kinase 13	Cdk13	0.981878	3	S	0.00989814	S(1)LS(1)PLGGRDES(0.982)PVS(0.018)HR	_S(ph)LS(ph)PLGGRDES(ph)PVSHR_	2	967.384	326
O55003	BCL2/adenovirus E1B 19 kDa protein-interacting protein 3	Bnip3	0.981614	1;3	S	3.08008e-17	AEIDS(0.018)HS(0.982)FGEKNS(0.784)T(0.226)LS(0.99)EEDYIER	_AEIDSHS(ph)FGEKNS(ph)TLS(ph)EEDYIER_	3	966.038	79
Q69ZS7	HBS1-like protein	Hbs1l	0.97995	1	S	0.00346506	S(0.002)S(0.002)QS(0.98)ES(0.016)EIVPK	_SSQS(ph)ESEIVPK_	2	635.782	150
Q8K310	Matrin-3	Matr3	0.979325	1	S	2.51865e-05	RDS(0.979)FDDRGPS(0.021)LNPVLDYDHGSR	_RDS(ph)FDDRGPSLNPVLDYDHGSR_	4	650.29	188
Q9CSN1	SNW domain-containing protein 1	Snw1	0.979214	2	S	0.00132636	GPPS(1)PPAPVMHS(0.979)PS(0.021)RK	_GPPS(ph)PPAPVMHS(ph)PSRK_	2	901.396	232
D3YUT2	Alpha-protein kinase 3	Alpk3	0.977362	1	S	0.0119	AEERES(0.011)PT(0.011)VS(0.977)PR	_AEERESPTVS(ph)PR_	2	719.322	1169
Q62261	Spectrin beta chain, brain 1	Sptbn1	0.976392	3	S	2.32569e-26	T(0.077)S(0.098)S(0.825)KES(0.024)S(0.976)PVPS(0.991)PT(0.009)LDRK	_TSS(ph)KESS(ph)PVPS(ph)PTLDRK_	2	1028.43	2164
Q8C405	Nuclear autoantigen Sp-100	Sp100	0.975364	1	S	1.95626e-06	DRGGDT(0.016)S(0.975)DT(0.008)ES(0.001)SIIIR	_DRGGDTS(ph)DTESSIIIR_	2	901.402	314
E9PW43	Protein transport protein Sec61 subunit beta	Gm10320	0.974395	1	S	1.90054e-72	PGPTPSGTNVGSSGRS(0.974)PS(0.026)K	_PGPTPSGTNVGSSGRS(ph)PSK_	2	925.426	34
Q569Z6	Thyroid hormone receptor-associated protein 3	Thrap3	0.974252	2	S	6.37773e-23	WAHDKFS(1)GEEGEIEDDES(0.974)GT(0.026)ENR	_WAHDKFS(ph)GEEGEIEDDES(ph)GTENR_	3	933.015	935
Q8K019	Bcl-2-associated transcription factor 1	Bclaf1	0.974137	2	S	1.91419e-06	YS(0.974)PS(0.026)QNS(1)PIHHIPSR	_YS(ph)PSQNS(ph)PIHHIPSR_	2	940.398	284
P53986	Monocarboxylate transporter 1	Slc16a1	0.973973	1	S	1.13064e-06	EGKEDEAS(0.974)T(0.026)DVDEKPK	_EGKEDEAS(ph)TDVDEKPK_	3	619.598	461
A0A087WRM5			0.973086	3	S	0.00175754	APPPKEVEEDS(0.901)EDEEMS(0.154)EDEDDS(0.973)S(0.972)GEEEVVIPQKK	_APPPKEVEEDS(ph)EDEEMSEDEDDS(ph)S(ph)GEEEVVIPQKK_	4	1043.65	24
Q8C1D8	Protein IWS1 homolog	Iws1	0.972668	4	S	2.20711e-05	VS(0.96)DS(0.973)ES(0.067)EDPPRPQAS(0.874)DS(0.61)ES(0.516)EELPKPR	_VS(ph)DS(ph)ESEDPPRPQAS(ph)DS(ph)ESEELPKPR_	3	1063.4	198
Q9DBC3	Cap-specific mRNA (nucleoside-2'-O-)-methyltransferase 1	Ftsjd2	0.972578	2	S	3.31706e-06	HLS(0.973)S(0.435)T(0.296)S(0.296)DDEPLSSVNHAAK	_HLS(ph)S(ph)TSDDEPLSSVNHAAK_	2	1077.94	27
A0A087WRM5			0.971757	3	S	0.00175754	APPPKEVEEDS(0.901)EDEEMS(0.154)EDEDDS(0.973)S(0.972)GEEEVVIPQKK	_APPPKEVEEDS(ph)EDEEMSEDEDDS(ph)S(ph)GEEEVVIPQKK_	4	1043.65	25
Q9D6Z1	Nucleolar protein 56	Nop56	0.970014	2;3	S	1.25648e-36	KS(0.03)S(0.97)PKEEVAS(1)EPEEAASPTTPK	_KSS(ph)PKEEVAS(ph)EPEEAASPTTPK_	2	1230.04	529
P43276	Histone H1.5	Hist1h1b	0.968911	1	S	0.000338324	S(0.969)ET(0.031)APAETAAPAPVEK	_(ac)S(ph)ETAPAETAAPAPVEK_	2	845.882	2
Q9DCE9		Igtp	0.968806	1	S	3.56775e-14	DLEAAVS(0.031)S(0.969)EDDTANLER	_DLEAAVSS(ph)EDDTANLER_	2	957.902	304
Q07113	Cation-independent mannose-6-phosphate receptor	Igf2r	0.967851	1	S	6.38083e-08	AEALS(0.016)S(0.016)LHGDDQDS(0.968)EDEVLTVPEVK	_AEALSSLHGDDQDS(ph)EDEVLTVPEVK_	3	921.746	2401
Q8JZQ9	Eukaryotic translation initiation factor 3 subunit B	Eif3b	0.9654	1;2;3	S	7.74412e-120	AKPAAQSEEETAT(0.035)S(0.965)PAAS(1)PTPQSAER	_AKPAAQSEEETATS(ph)PAAS(ph)PTPQSAER_	2	1386.59	75
O35887	Calumenin	Calu	0.964283	1	S	1.85702e-05	SFDQLT(0.036)PEES(0.964)KER	_SFDQLTPEES(ph)KER_	2	823.359	69
Q52KI8	Serine/arginine repetitive matrix protein 1	Srrm1	0.963506	4	S	2.59964e-10	AKS(1)PT(1)PS(0.037)LS(0.964)PARNS(0.999)DQEGGGK	_AKS(ph)PT(ph)PSLS(ph)PARNS(ph)DQEGGGK_	3	801.972	838
P00186	Cytochrome P450 1A2	Cyp1a2	0.961853	1	T	0.00168163	VDLT(0.962)PNY(0.037)GLT(0.001)MKPGTCEHVQAWPR	_VDLT(ph)PNYGLTMKPGTCEHVQAWPR_	3	931.768	490
A2AU61		C130057N11Rik	0.961446	1	Y	0.0209503	AATAIY(0.961)RLFDY(0.039)RGR	_AATAIY(ph)RLFDYRGR_	2	876.933	109
Q8C1D8	Protein IWS1 homolog	Iws1	0.960085	4	S	2.20711e-05	VS(0.96)DS(0.973)ES(0.067)EDPPRPQAS(0.874)DS(0.61)ES(0.516)EELPKPR	_VS(ph)DS(ph)ESEDPPRPQAS(ph)DS(ph)ESEELPKPR_	3	1063.4	196
Q5BL07	Peroxisome biogenesis factor 1	Pex1	0.959572	1	S	8.44537e-12	S(0.04)QS(0.96)GEDESLNQPGPIK	_SQS(ph)GEDESLNQPGPIK_	2	883.386	1212
P62996	Transformer-2 protein homolog beta	Tra2b	0.959185	3	S	8.74002e-11	RHS(1)HS(0.952)HS(0.061)PMS(0.959)T(0.028)R	_RHS(ph)HS(ph)HSPMS(ph)TR_	2	830.286	102
A3KGS3	Ral GTPase-activating protein subunit alpha-2	Ralgapa2	0.958797	2	S	2.89259e-06	RS(0.219)S(0.822)S(0.959)PAELELKDDLQQAHGR	_RSS(ph)S(ph)PAELELKDDLQQAHGR_	3	799.691	820
Q6DVA0	LEM domain-containing protein 2	Lemd2	0.957127	2	S	8.00573e-06	AS(0.045)VRGS(0.957)S(0.998)EDDEDTRTPDR	_ASVRGS(ph)S(ph)EDDEDTRTPDR_	3	718.278	149
P16254	Signal recognition particle 14 kDa protein	Srp14	0.955506	1	S	1.19253e-09	KS(0.044)S(0.956)VEGLEPAENK	_KSS(ph)VEGLEPAENK_	2	734.34	45
P62996	Transformer-2 protein homolog beta	Tra2b	0.955075	2;3	S	0.00143374	RHS(1)HS(1)HS(0.955)PMS(0.021)T(0.024)R	_RHS(ph)HS(ph)HS(ph)PMSTR_	3	553.86	99
Q99MZ3	Carbohydrate-responsive element-binding protein	Mlxipl	0.954588	2	S	2.2138e-06	VVPS(0.001)PDS(0.955)DS(0.833)DT(0.211)DLEDPSPR	_VVPSPDS(ph)DS(ph)DTDLEDPSPR_	2	1094.42	23
E9QNH7	Acyl-CoA-binding domain-containing protein 5	Acbd5	0.953244	2	S	8.61505e-49	AES(0.002)S(0.045)DS(0.953)GAES(1)EEEEAQEELK	_AESSDS(ph)GAES(ph)EEEEAQEELK_	2	1157.41	187
Q5EBP8	Heterogeneous nuclear ribonucleoprotein A1	Hnrnpa1	0.953136	2	S	1.6372e-07	S(0.048)KS(0.953)ES(0.999)PKEPEQLR	_(ac)SKS(ph)ES(ph)PKEPEQLR_	2	858.866	4
Q9CQV4	Protein FAM134C	Fam134c	0.950232	1;2	S	0.000271621	GQTPLT(0.697)EGS(0.305)EDLDGHS(0.95)DPEES(0.048)FAR	_GQTPLT(ph)EGSEDLDGHS(ph)DPEESFAR_	3	912.023	320
Q9JMH9	Unconventional myosin-XVIIIa	Myo18a	0.950175	2	S	5.09038e-05	FSHS(0.001)YLS(0.996)DS(0.95)DT(0.053)EAK	_FSHSYLS(ph)DS(ph)DTEAK_	2	873.818	2039
A0JNY3	Gephyrin	Gphn	0.949073	2	S	1.49319e-05	EVHDELEDLPS(1)PPPPLS(0.949)PPPT(0.02)T(0.023)S(0.008)PHK	_EVHDELEDLPS(ph)PPPPLS(ph)PPPTTSPHK_	3	991.782	194
Q9EQC0	Carbohydrate sulfotransferase 1	Chst1	0.946052	3	S	0.0147868	LCEEGPT(0.934)FS(0.946)Y(0.94)NLS(0.18)RK	_LCEEGPT(ph)FS(ph)Y(ph)NLSRK_	2	992.372	54
Q60598	Src substrate cortactin	Cttn	0.94483	3	S	6.81048e-09	KQT(0.905)PPAS(0.15)PS(0.945)PQPIEDRPPS(0.507)S(0.476)PIY(0.018)EDAAPFK	_KQT(ph)PPASPS(ph)PQPIEDRPPS(ph)SPIYEDAAPFK_	4	872.637	407
G5E8I8	Calcium homeostasis endoplasmic reticulum protein	Cherp	0.944781	4	T	5.00735e-05	S(0.999)RS(0.999)RS(0.998)PT(0.945)PPS(0.059)AAGLGSNSAPPIPDSR	_S(ph)RS(ph)RS(ph)PT(ph)PPSAAGLGSNSAPPIPDSR_	3	961.394	830
Q8VHR5	Transcriptional repressor p66-beta	Gatad2b	0.940854	4	S	2.2525e-10	GRLT(1)PS(1)PDIIVLS(1)DNEAS(0.059)S(0.941)PR	_GRLT(ph)PS(ph)PDIIVLS(ph)DNEASS(ph)PR_	3	848.679	136
Q9EQC0	Carbohydrate sulfotransferase 1	Chst1	0.940312	3	Y	0.0147868	LCEEGPT(0.934)FS(0.946)Y(0.94)NLS(0.18)RK	_LCEEGPT(ph)FS(ph)Y(ph)NLSRK_	2	992.372	55
Q02248	Catenin beta-1	Ctnnb1	0.940143	1	S	0.00131408	RT(0.06)S(0.94)MGGTQQQFVEGVR	_RTS(ph)MGGTQQQFVEGVR_	2	930.925	552
Q04692	SWI/SNF-related matrix-associated actin-dependent regulator of chromatin subfamily A containing DEAD/H box 1	Smarcad1	0.94012	2	S	0.0109392	DTVIIVS(0.935)EPS(0.94)EDEES(0.112)HDLPS(0.006)VT(0.006)R	_DTVIIVS(ph)EPS(ph)EDEESHDLPSVTR_	3	905.388	127
Q99L43	Phosphatidate cytidylyltransferase 2	Cds2	0.93612	1;2	S	4.74486e-53	EDAPPEDKESESEAKLDGET(0.055)AS(0.936)DS(0.008)ESR	_EDAPPEDKESESEAKLDGETAS(ph)DSESR_	3	996.742	32
Q04692	SWI/SNF-related matrix-associated actin-dependent regulator of chromatin subfamily A containing DEAD/H box 1	Smarcad1	0.935138	2	S	0.0109392	DTVIIVS(0.935)EPS(0.94)EDEES(0.112)HDLPS(0.006)VT(0.006)R	_DTVIIVS(ph)EPS(ph)EDEESHDLPSVTR_	3	905.388	124
Q9EQC0	Carbohydrate sulfotransferase 1	Chst1	0.933836	3	T	0.0147868	LCEEGPT(0.934)FS(0.946)Y(0.94)NLS(0.18)RK	_LCEEGPT(ph)FS(ph)Y(ph)NLSRK_	2	992.372	52
Q61165	Sodium/hydrogen exchanger 1	Slc9a1	0.927113	1	S	1.10528e-07	SKEPSSPGTDDVFTPGSS(0.001)DS(0.927)PS(0.05)S(0.022)QR	_SKEPSSPGTDDVFTPGSSDS(ph)PSSQR_	3	878.04	790
P25446	Tumor necrosis factor receptor superfamily member 6	Fas	0.925639	2;3	S	0.000203631	T(0.491)S(0.556)S(0.683)RET(0.27)IPMNAS(0.001)NLS(0.926)LS(0.073)K	_TS(ph)S(ph)RETIPMNASNLS(ph)LSK_	2	1088.44	220
Q9CQ73		Pkp2	0.92441	2	S	3.53416e-05	LEIS(1)PDS(0.076)S(0.924)PER	_LEIS(ph)PDSS(ph)PER_	2	695.27	155
Q6NZJ6	Eukaryotic translation initiation factor 4 gamma 1	Eif4g1	0.919442	1	S	0.00317072	S(0.919)FS(0.081)KEVEER	_S(ph)FSKEVEER_	2	595.758	1187
Q99JB8	Protein kinase C and casein kinase II substrate protein 3	Pacsin3	0.919214	1	S	8.13625e-13	DGTAPPPQSPS(0.007)S(0.031)PGS(0.031)GQDEDWS(0.919)DEES(0.012)PRK	_DGTAPPPQSPSSPGSGQDEDWS(ph)DEESPRK_	3	1040.76	354
E9Q7G0		Numa1	0.917367	1	S	5.02168e-06	TQPDGTSVPGEPAS(0.917)PIS(0.083)QR	_TQPDGTSVPGEPAS(ph)PISQR_	2	1002.46	1739
F8VQ28	Paxillin	Pxn	0.916203	1	Y	0.000106235	AGEEEHVY(0.916)S(0.084)FPNK	_AGEEEHVY(ph)SFPNK_	2	793.83	118
P35492	Histidine ammonia-lyase	Hal	0.914219	1	S	0.000126638	KNS(0.914)AT(0.086)IPESDDL	_KNS(ph)ATIPESDDL_	2	685.298	648
Q61033	Lamina-associated polypeptide 2, isoforms alpha/zeta	Tmpo	0.91129	2	T	0.00185324	S(0.544)S(0.544)T(0.911)PLPTVSSSAENTR	_S(ph)ST(ph)PLPTVSSSAENTR_	2	897.371	159
E9QMN5	Transcriptional repressor p66 alpha	Gatad2a	0.91007	3	S	0.000381967	RPPS(1)PDVIVLS(0.91)DS(0.09)EQPS(0.183)S(0.817)PR	_RPPS(ph)PDVIVLS(ph)DSEQPSS(ph)PR_	3	801.673	103
Q62318	Transcription intermediary factor 1-beta	Trim28	0.910067	2	S	5.21451e-10	AASAAATAAASAATAASAAS(0.1)GS(0.91)PGS(0.754)GEGS(0.235)AGGEK	_(ac)AASAAATAAASAATAASAASGS(ph)PGS(ph)GEGSAGGEK_	3	975.071	23
Q6ZPE2	Myotubularin-related protein 5	Sbf1	0.902258	2	Y	0.00703895	YLQAVVS(0.542)S(0.542)MPRY(0.902)ADS(0.007)S(0.007)GR	_YLQAVVS(ph)SM(ox)PRY(ph)ADSSGR_	3	721.637	1255
A0A087WRM5			0.900895	3	S	0.00175754	APPPKEVEEDS(0.901)EDEEMS(0.154)EDEDDS(0.973)S(0.972)GEEEVVIPQKK	_APPPKEVEEDS(ph)EDEEMSEDEDDS(ph)S(ph)GEEEVVIPQKK_	4	1043.65	12
Q569Z6	Thyroid hormone receptor-associated protein 3	Thrap3	0.898938	2	T	1.19423e-33	WAHDKFS(1)GEEGEIEDDES(0.101)GT(0.899)ENREEK	_WAHDKFS(ph)GEEGEIEDDESGT(ph)ENREEK_	3	1061.74	937
Q3TWW8		Srsf6	0.897131	4	S	0.0138224	S(0.346)RS(0.883)QS(0.897)RS(0.883)HS(0.989)PLPAPPS(0.001)K	_SRS(ph)QS(ph)RS(ph)HS(ph)PLPAPPSK_	3	713.612	299
Q9JMH9	Unconventional myosin-XVIIIa	Myo18a	0.896034	2	S	3.83737e-08	S(0.008)S(0.008)S(0.896)PT(0.044)S(0.044)HWKPLAPDPS(0.999)DDEHDPVDS(0.001)ISRPR	_SSS(ph)PTSHWKPLAPDPS(ph)DDEHDPVDSISRPR_	4	868.877	2003
P31750	RAC-alpha serine/threonine-protein kinase	Akt1	0.895147	1	S	0.000878992	S(0.076)GS(0.895)PS(0.025)DNS(0.003)GAEEMEVSLAKPK	_SGS(ph)PSDNSGAEEMEVSLAKPK_	3	733.987	124
A2AN08	E3 ubiquitin-protein ligase UBR4	Ubr4	0.893012	3	T	8.70484e-05	HVT(0.006)LPS(0.7)S(0.7)PRS(0.701)NT(0.893)PMGDKDDDDDDDADEK	_HVTLPS(ph)S(ph)PRSNT(ph)PMGDKDDDDDDDADEK_	3	1104.74	2721
A7TU71	Protein Shroom2	Shroom2	0.892279	2	S	0.000658366	S(0.226)RS(0.771)S(0.892)PS(0.054)T(0.053)DHY(0.004)SQEVPVEPNR	_SRS(ph)S(ph)PSTDHYSQEVPVEPNR_	3	811.335	960
P11352	Glutathione peroxidase 1	Gpx1	0.887127	1	S	0.000760228	TIDIEPDIETLLS(0.017)QQS(0.096)GNS(0.887)	_TIDIEPDIETLLSQQSGNS(ph)_	2	1070.49	201
Q3TWW8		Srsf6	0.883116	4	S	0.0138224	S(0.346)RS(0.883)QS(0.897)RS(0.883)HS(0.989)PLPAPPS(0.001)K	_SRS(ph)QS(ph)RS(ph)HS(ph)PLPAPPSK_	3	713.612	301
Q3TWW8		Srsf6	0.883113	4	S	0.0138224	S(0.346)RS(0.883)QS(0.897)RS(0.883)HS(0.989)PLPAPPS(0.001)K	_SRS(ph)QS(ph)RS(ph)HS(ph)PLPAPPSK_	3	713.612	297
Q8BTI8	Serine/arginine repetitive matrix protein 2	Srrm2	0.881743	2	S	0.00239721	S(1)RS(0.882)PQRPGWS(0.118)R	_S(ph)RS(ph)PQRPGWSR_	2	737.311	533
Q05CL8	La-related protein 7	Larp7	0.880003	2	S	4.4633e-21	T(0.12)AS(0.88)EGS(1)EAETPEAPKQPAK	_TAS(ph)EGS(ph)EAETPEAPKQPAK_	2	1044.43	253
Q8VCB3	Glycogen [starch] synthase, liver	Gys2	0.878279	1	S	0.0166079	AFPDKFHLEPT(0.104)S(0.878)PPT(0.011)T(0.007)DGFK	_AFPDKFHLEPTS(ph)PPTTDGFK_	3	771.359	627
Q8C1D8	Protein IWS1 homolog	Iws1	0.874043	4	S	2.20711e-05	VS(0.96)DS(0.973)ES(0.067)EDPPRPQAS(0.874)DS(0.61)ES(0.516)EELPKPR	_VS(ph)DS(ph)ESEDPPRPQAS(ph)DS(ph)ESEELPKPR_	3	1063.4	209
E9Q5W5	Zinc finger ZZ-type and EF-hand domain-containing protein 1	Zzef1	0.871223	2	S	0.00139753	DLEILS(0.871)IMLY(0.324)S(0.402)S(0.402)KK	_DLEILS(ph)IM(ox)LYS(ph)SKK_	3	605.947	2370
Q3UVT7	Palmdelphin	Palmd	0.86602	2	S	0.00702349	MELS(0.99)PS(0.144)RAS(0.866)PGK	_MELS(ph)PSRAS(ph)PGK_	2	710.291	375
J3QNU6	Beta-arrestin-1	Arrb1	0.863658	1	S	4.66026e-07	GMKDDKDEEDDGT(0.136)GS(0.864)PHLNNR	_GMKDDKDEEDDGTGS(ph)PHLNNR_	3	803.992	413
Q8C5N3	Pre-mRNA-splicing factor CWC22 homolog	Cwc22	0.862064	1	S	0.00908263	GGGQS(0.138)S(0.862)PQEEPTWK	_GGGQSS(ph)PQEEPTWK_	2	784.325	106
Q52KI8	Serine/arginine repetitive matrix protein 1	Srrm1	0.860317	2	S	0.00136511	RLS(1)PS(0.14)AS(0.86)PPR	_RLS(ph)PSAS(ph)PPR_	2	614.268	391
E9QKI4	Proline-rich AKT1 substrate 1	Akt1s1	0.860266	2;3	S	2.41268e-07	S(0.436)S(0.564)DEENGPPS(0.14)S(0.86)PDLDR	_SS(ph)DEENGPPSS(ph)PDLDR_	2	931.33	284
Q5DTM8	E3 ubiquitin-protein ligase BRE1A	Rnf20	0.857857	1	S	0.00113536	ALVVPEPEPDS(0.142)DS(0.858)NQER	_ALVVPEPEPDSDS(ph)NQER_	2	981.428	138
P43274	Histone H1.4	Hist1h1e	0.85749	1	S	9.86734e-07	S(0.857)ET(0.143)APAAPAAPAPAEK	_(ac)S(ph)ETAPAAPAAPAPAEK_	2	800.866	2
E9Q0S6		Tns1	0.857309	1	S	0.023273	S(0.143)QS(0.857)FPDVEPQLPQAPTR	_SQS(ph)FPDVEPQLPQAPTR_	2	988.959	792
O08715	A-kinase anchor protein 1, mitochondrial	Akap1	0.855133	1	S	0.00183948	S(0.033)ES(0.855)S(0.112)GNLPSVADTR	_SES(ph)SGNLPSVADTR_	2	750.322	103
E9Q8N8	Electrogenic sodium bicarbonate cotransporter 1	Slc4a4	0.84857	2	S	1.19695e-13	NLT(0.988)S(0.038)S(0.849)S(0.121)LNDIS(0.005)DKPEKDQLK	_NLT(ph)SS(ph)SLNDISDKPEKDQLK_	2	1196.54	256
Q5UAK0	Mesoderm induction early response protein 1	Mier1	0.838844	2	S	0.028534	INS(0.839)S(0.482)GKES(0.482)PGS(0.143)S(0.054)EFFQEAVSHGK	_INS(ph)S(ph)GKESPGSSEFFQEAVSHGK_	3	857.026	482
Q99MZ3	Carbohydrate-responsive element-binding protein	Mlxipl	0.833401	2	S	2.2138e-06	VVPS(0.001)PDS(0.955)DS(0.833)DT(0.211)DLEDPSPR	_VVPSPDS(ph)DS(ph)DTDLEDPSPR_	2	1094.42	25
Q3TZZ7	Extended synaptotagmin-2	Esyt2	0.823553	2	S	0.00161424	S(0.25)S(0.25)S(0.677)S(0.824)LLASPSHIAAK	_SSS(ph)S(ph)LLASPSHIAAK_	2	808.36	663
E9Q942	UPF0766 protein C6orf228 homolog		0.82281	2	S	3.5146e-08	ELVGDTGSQEGDNEQPS(0.823)GS(0.823)ET(0.354)EEDPSASPQK	_ELVGDTGSQEGDNEQPS(ph)GS(ph)ETEEDPSASPQK_	3	1122.1	61
E9Q942	UPF0766 protein C6orf228 homolog		0.822809	2	S	3.5146e-08	ELVGDTGSQEGDNEQPS(0.823)GS(0.823)ET(0.354)EEDPSASPQK	_ELVGDTGSQEGDNEQPS(ph)GS(ph)ETEEDPSASPQK_	3	1122.1	59
A3KGS3	Ral GTPase-activating protein subunit alpha-2	Ralgapa2	0.82248	2	S	2.89259e-06	RS(0.219)S(0.822)S(0.959)PAELELKDDLQQAHGR	_RSS(ph)S(ph)PAELELKDDLQQAHGR_	3	799.691	819
A2A5R2		Arfgef2	0.818637	2	T	1.18552e-10	ELEKPMQSKPQS(1)PVIQAT(0.819)AGS(0.181)PK	_ELEKPMQSKPQS(ph)PVIQAT(ph)AGSPK_	3	871.079	224
E9QMN5	Transcriptional repressor p66 alpha	Gatad2a	0.816618	3	S	0.000381967	RPPS(1)PDVIVLS(0.91)DS(0.09)EQPS(0.183)S(0.817)PR	_RPPS(ph)PDVIVLS(ph)DSEQPSS(ph)PR_	3	801.673	110
Q8K2F8	Protein LSM14 homolog A	Lsm14a	0.81373	2	S	0.000658224	S(0.484)S(0.518)PQLDPLRKS(0.814)PT(0.181)MEQAVQT(0.003)AS(0.001)AHLPAPAPVGR	_SS(ph)PQLDPLRKS(ph)PTMEQAVQTASAHLPAPAPVGR_	4	900.188	192
P53569	CCAAT/enhancer-binding protein zeta	Cebpz	0.813718	2	S	1.10966e-11	S(0.001)QLDDHPES(0.999)DEENFVDVGDDS(0.814)DDEKFT(0.179)DADKGT(0.006)AT(0.001)DAVK	_SQLDDHPES(ph)DEENFVDVGDDS(ph)DDEKFTDADKGTATDAVK_	4	1104.94	641
Q8VCS9	Transporter	Slc6a12	0.812669	2	S	0.037489	AWEERAS(0.996)LS(0.191)S(0.813)MDRK	_AWEERAS(ph)LSS(ph)MDRK_	3	609.25	14
Q6Y7W8	PERQ amino acid-rich with GYF domain-containing protein 2	Gigyf2	0.808948	3	S	0.0301122	ALS(0.278)S(0.316)GGS(0.408)IT(0.207)S(0.809)PPLS(0.983)PALPK	_ALSSGGS(ph)ITS(ph)PPLS(ph)PALPK_	2	1010.45	26
G3X8T2	Zinc finger CCCH domain-containing protein 18	Zc3h18	0.798871	1	T	0.00435515	VQS(0.014)QEET(0.799)RS(0.179)DEEDRAS(0.008)EPK	_VQSQEET(ph)RSDEEDRASEPK_	3	767.327	62
F8WJE0	SAM domain and HD domain-containing protein 1	Samhd1	0.796124	2	T	7.67143e-07	T(0.784)PPS(0.39)T(0.796)PPAT(0.029)ANLSADDDFQNTDLR	_T(ph)PPST(ph)PPATANLSADDDFQNTDLR_	3	902.044	56
O55003	BCL2/adenovirus E1B 19 kDa protein-interacting protein 3	Bnip3	0.794941	2;3	S	7.64311e-45	AEIDSHSFGEKNS(0.795)T(0.211)LS(0.994)EEDYIER	_AEIDSHSFGEKNS(ph)TLS(ph)EEDYIER_	3	939.383	85
P09023	Homeobox protein Hox-B6	Hoxb6	0.792246	3	S	0.0146745	KES(0.693)KLLS(0.792)AS(0.792)QLS(0.722)AEEEEEK	_KESKLLS(ph)AS(ph)QLS(ph)AEEEEEK_	2	1187.99	209
P09023	Homeobox protein Hox-B6	Hoxb6	0.792246	3	S	0.0146745	KES(0.693)KLLS(0.792)AS(0.792)QLS(0.722)AEEEEEK	_KESKLLS(ph)AS(ph)QLS(ph)AEEEEEK_	2	1187.99	211
Q60953	Protein PML	Pml	0.788295	1	S	2.851e-06	AT(0.208)S(0.788)PPHLDGT(0.004)SNPESTVPEKK	_ATS(ph)PPHLDGTSNPESTVPEKK_	3	758.021	528
Q9ERU9	E3 SUMO-protein ligase RanBP2	Ranbp2	0.786361	1	S	0.00842806	S(0.014)HET(0.199)DGGS(0.786)AHGDEEDDGPHFEPVVPLPDKIEVK	_SHETDGGS(ph)AHGDEEDDGPHFEPVVPLPDKIEVK_	4	905.652	1154
Q6DFZ1		Gbf1	0.784764	1	S	0.010911	GY(0.001)T(0.05)S(0.785)DS(0.158)EVY(0.002)T(0.004)DHGRPGK	_GYTS(ph)DSEVYTDHGRPGK_	3	650.274	1318
F8WJE0	SAM domain and HD domain-containing protein 1	Samhd1	0.784241	2	T	7.67143e-07	T(0.784)PPS(0.39)T(0.796)PPAT(0.029)ANLSADDDFQNTDLR	_T(ph)PPST(ph)PPATANLSADDDFQNTDLR_	3	902.044	52
F8VQC1		Srp72	0.78412	2	S	2.6106e-12	AVS(0.215)S(0.784)PPT(0.506)S(0.455)PRPGS(0.039)AAT(0.001)ISSSASNIVPPR	_AVSS(ph)PPT(ph)SPRPGSAATISSSASNIVPPR_	3	951.118	621
Q8K3A9	7SK snRNA methylphosphate capping enzyme	Mepce	0.783742	2	S	1.30499e-07	ALNAET(1)PKS(0.216)S(0.784)PLPAK	_ALNAET(ph)PKSS(ph)PLPAK_	2	842.391	192
Q99KG5	Lipolysis-stimulated lipoprotein receptor	Lsr	0.780335	2	S	0.010235	SVDALDDINRPGS(0.78)T(0.164)ES(0.161)GRS(0.209)S(0.194)PPS(0.046)S(0.445)GR	_SVDALDDINRPGS(ph)TESGRSSPPSS(ph)GR_	3	935.401	448
Q99L43	Phosphatidate cytidylyltransferase 2	Cds2	0.773428	2	S	3.27912e-18	EDAPPEDKES(0.773)ES(0.227)EAKLDGET(0.15)AS(0.826)DS(0.021)ES(0.003)R	_EDAPPEDKES(ph)ESEAKLDGETAS(ph)DSESR_	3	1023.4	20
A2AJI0	MAP7 domain-containing protein 1	Map7d1	0.77322	2;3	S	3.0897e-05	AAEEKEPAAPAS(1)PAPS(0.993)PVPS(0.773)PT(0.234)PAQPQK	_AAEEKEPAAPAS(ph)PAPS(ph)PVPS(ph)PTPAQPQK_	3	997.438	552
Q64012	RNA-binding protein Raly	Raly	0.772007	2	S	0.00953844	LPAPQEDT(0.228)AS(0.772)EAGT(0.999)PQGEVQTR	_LPAPQEDTAS(ph)EAGT(ph)PQGEVQTR_	3	814.679	270
P58871	182 kDa tankyrase-1-binding protein	Tnks1bp1	0.771806	1	S	1.96761e-06	MQAES(0.114)QS(0.772)PT(0.114)NVDLEDKER	_MQAESQS(ph)PTNVDLEDKER_	3	719.644	1063
A7TU71	Protein Shroom2	Shroom2	0.771047	2	S	0.000658366	S(0.226)RS(0.771)S(0.892)PS(0.054)T(0.053)DHY(0.004)SQEVPVEPNR	_SRS(ph)S(ph)PSTDHYSQEVPVEPNR_	3	811.335	959
Q64012	RNA-binding protein Raly	Raly	0.770888	2	T	0.00413443	DDGDEEGLLT(0.21)HS(0.662)EEELEHS(0.357)QDT(0.771)DAEDGALQ	_DDGDEEGLLTHS(ph)EEELEHSQDT(ph)DAEDGALQ_	3	1148.76	304
Q6ZQ58	La-related protein 1	Larp1	0.770026	2	S	0.00201669	S(0.77)LPT(0.074)T(0.156)VPES(0.996)PNY(0.004)R	_S(ph)LPTTVPES(ph)PNYR_	2	810.839	743
E9Q0N0	Intersectin-1	Itsn1	0.769401	1	S	4.64886e-16	LPEEPS(0.231)S(0.769)EDEQQPEK	_LPEEPSS(ph)EDEQQPEK_	2	911.375	335
Q8VDU5	SNF-related serine/threonine-protein kinase	Snrk	0.768844	1	S	1.11524e-07	RDS(0.769)S(0.231)EGPPGSEGDGGGQSKPSSGGGVDK	_RDS(ph)SEGPPGSEGDGGGQSKPSSGGGVDK_	3	890.042	569
O08582	GTP-binding protein 1	Gtpbp1	0.768662	2	S	2.23703e-08	S(0.118)RS(0.769)PVDS(0.114)PVPASMFAPEPS(0.643)S(0.357)PGAAR	_SRS(ph)PVDSPVPASMFAPEPS(ph)SPGAAR_	3	886.387	8
Q61136	Serine/threonine-protein kinase PRP4 homolog	Prpf4b	0.762192	2	S	0.0409627	S(0.272)KDAS(0.729)PINRWS(0.762)PT(0.237)R	_SKDAS(ph)PINRWS(ph)PTR_	2	887.887	437
Q8R502	Leucine-rich repeat-containing protein 8C	Lrrc8c	0.756886	2	S	0.0353983	S(0.244)QS(0.757)LKS(0.999)IPEK	_SQS(ph)LKS(ph)IPEK_	2	638.783	212
Q62318	Transcription intermediary factor 1-beta	Trim28	0.753954	2	S	5.21451e-10	AASAAATAAASAATAASAAS(0.1)GS(0.91)PGS(0.754)GEGS(0.235)AGGEK	_(ac)AASAAATAAASAATAASAASGS(ph)PGS(ph)GEGSAGGEK_	3	975.071	26
G3X8X0		Dhx16	0.75203	2	S	0.00149112	AGGS(0.182)KS(0.752)PT(0.067)EEKPAS(1)EDEWER	_AGGSKS(ph)PTEEKPAS(ph)EDEWER_	3	783.981	155
Q9Z1R2	Large proline-rich protein BAG6	Bag6	0.751624	1	S	0.00523858	VGDPPQTLPEEPMEVQGAERT(0.248)S(0.752)PEPQR	_VGDPPQTLPEEPMEVQGAERTS(ph)PEPQR_	3	1018.8	986
P62754	40S ribosomal protein S6	Rps6	0.749489	3	S	0.00227913	RLS(1)S(1)LRAS(0.749)T(0.211)S(0.039)K	_RLS(ph)S(ph)LRAS(ph)TSK_	2	723.301	240
Q9DD18	D-tyrosyl-tRNA(Tyr) deacylase 1	Dtd1	0.74503	1	S	0.000865856	S(0.074)AS(0.181)S(0.745)GAEGDVSSEREP	_SASS(ph)GAEGDVSSEREP_	2	822.823	197
P26231	Catenin alpha-1	Ctnna1	0.728795	3	T	1.5268e-16	S(0.282)RT(0.729)S(0.989)VQT(1)EDDQLIAGQSAR	_SRT(ph)S(ph)VQT(ph)EDDQLIAGQSAR_	2	1151.46	654
Q61136	Serine/threonine-protein kinase PRP4 homolog	Prpf4b	0.728757	2	S	0.0409627	S(0.272)KDAS(0.729)PINRWS(0.762)PT(0.237)R	_SKDAS(ph)PINRWS(ph)PTR_	2	887.887	431
P09023	Homeobox protein Hox-B6	Hoxb6	0.72224	3	S	0.0146745	KES(0.693)KLLS(0.792)AS(0.792)QLS(0.722)AEEEEEK	_KESKLLS(ph)AS(ph)QLS(ph)AEEEEEK_	2	1187.99	214
Q6PGL7	WASH complex subunit FAM21	Fam21	0.72126	1	S	1.05197e-06	TSALLFS(0.279)S(0.721)DEEDQWNIADSHTK	_TSALLFSS(ph)DEEDQWNIADSHTK_	3	858.706	614
Q8BI84	Melanoma inhibitory activity protein 3	Mia3	0.706495	1	S	8.05946e-05	TKQPANMILETGQES(0.006)ET(0.061)T(0.227)S(0.706)EEAGDVGK	_TKQPANMILETGQESETTS(ph)EEAGDVGK_	3	977.437	772
P97855	Ras GTPase-activating protein-binding protein 1	G3bp1	0.705523	1	S	1.49326e-10	S(0.147)T(0.147)S(0.706)PAPADVAPAQEDLR	_STS(ph)PAPADVAPAQEDLR_	2	902.909	231
E9QNH7	Acyl-CoA-binding domain-containing protein 5	Acbd5	0.703808	2	S	4.91957e-48	AES(0.003)S(0.704)DS(0.293)GAES(1)EEEEAQEELKGAEQSGSDDKK	_AESS(ph)DSGAES(ph)EEEEAQEELKGAEQSGSDDKK_	3	1139.44	185
A2AN08	E3 ubiquitin-protein ligase UBR4	Ubr4	0.701145	3	S	8.70484e-05	HVT(0.006)LPS(0.7)S(0.7)PRS(0.701)NT(0.893)PMGDKDDDDDDDADEK	_HVTLPS(ph)S(ph)PRSNT(ph)PMGDKDDDDDDDADEK_	3	1104.74	2719
A2AN08	E3 ubiquitin-protein ligase UBR4	Ubr4	0.700127	3	S	8.70484e-05	HVT(0.006)LPS(0.7)S(0.7)PRS(0.701)NT(0.893)PMGDKDDDDDDDADEK	_HVTLPS(ph)S(ph)PRSNT(ph)PMGDKDDDDDDDADEK_	3	1104.74	2715
A2AN08	E3 ubiquitin-protein ligase UBR4	Ubr4	0.700127	3	S	8.70484e-05	HVT(0.006)LPS(0.7)S(0.7)PRS(0.701)NT(0.893)PMGDKDDDDDDDADEK	_HVTLPS(ph)S(ph)PRSNT(ph)PMGDKDDDDDDDADEK_	3	1104.74	2716
P18608	Non-histone chromosomal protein HMG-14	Hmgn1	0.699807	2	T	1.39829e-09	QADVADQQTTELPAENGET(0.7)ENQS(0.307)PAS(0.993)EEEKEAK	_QADVADQQTTELPAENGET(ph)ENQSPAS(ph)EEEKEAK_	3	1245.18	80
Q3UMF0	Cordon-bleu protein-like 1	Cobll1	0.696815	1	S	0.000457849	S(0.151)T(0.151)S(0.697)VDDT(0.001)DKSSSEAIMVR	_STS(ph)VDDTDKSSSEAIMVR_	2	1004.43	366
Q9CQV4	Protein FAM134C	Fam134c	0.69658	2	T	0.000271621	GQTPLT(0.697)EGS(0.305)EDLDGHS(0.95)DPEES(0.048)FAR	_GQTPLT(ph)EGSEDLDGHS(ph)DPEESFAR_	3	912.023	310
Q922Q1	MOSC domain-containing protein 2, mitochondrial	2015-03-02	0.691185	1	T	0.0150516	CVLT(0.691)T(0.302)VDPDT(0.007)GIIDRK	_CVLT(ph)TVDPDTGIIDRK_	2	913.442	277
Q8K019	Bcl-2-associated transcription factor 1	Bclaf1	0.689168	2	Y	0.000701837	Y(0.689)S(0.308)PS(0.008)QNS(0.995)PIHHIPSRR	_Y(ph)SPSQNS(ph)PIHHIPSRR_	3	679.301	283
P25446	Tumor necrosis factor receptor superfamily member 6	Fas	0.682843	3	S	0.000203631	T(0.491)S(0.556)S(0.683)RET(0.27)IPMNAS(0.001)NLS(0.926)LS(0.073)K	_TS(ph)S(ph)RETIPMNASNLS(ph)LSK_	2	1088.44	208
P70302	Stromal interaction molecule 1	Stim1	0.681683	2	S	5.34268e-08	DLTHSDS(0.997)ES(0.321)S(0.682)LHMSDR	_DLTHSDS(ph)ESS(ph)LHMSDR_	2	988.858	524
Q8VHR5	Transcriptional repressor p66-beta	Gatad2b	0.677062	4	S	0.00754165	GRLT(1)PS(1)PDIIVLS(0.812)DNEAS(0.677)S(0.511)PR	_GRLT(ph)PS(ph)PDIIVLS(ph)DNEAS(ph)SPR_	2	1272.51	135
Q3TZZ7	Extended synaptotagmin-2	Esyt2	0.677024	2	S	0.00161424	S(0.25)S(0.25)S(0.677)S(0.824)LLASPSHIAAK	_SSS(ph)S(ph)LLASPSHIAAK_	2	808.36	662
P53986	Monocarboxylate transporter 1	Slc16a1	0.676553	1	T	1.11045e-23	EGKEDEAS(0.323)T(0.677)DVDEKPK	_EGKEDEAST(ph)DVDEKPK_	2	928.894	462
Q91XT4	Protein transport protein Sec16B	Sec16b	0.676327	2	S	0.000754348	VPS(0.024)FS(0.058)EDS(0.248)AAS(0.282)AKEDEEGS(0.675)S(0.676)DGADKPS(0.03)HPDAS(0.007)QK	_VPSFSEDSAASAKEDEEGS(ph)S(ph)DGADKPSHPDASQK_	4	906.365	875
Q91XT4	Protein transport protein Sec16B	Sec16b	0.675333	2	S	0.000754348	VPS(0.024)FS(0.058)EDS(0.248)AAS(0.282)AKEDEEGS(0.675)S(0.676)DGADKPS(0.03)HPDAS(0.007)QK	_VPSFSEDSAASAKEDEEGS(ph)S(ph)DGADKPSHPDASQK_	4	906.365	874
Q3UHF7	Transcription factor HIVEP2	Hivep2	0.672482	2	Y	0.0525571	ERRY(0.672)MT(0.733)T(0.594)IR	_ERRY(ph)M(ox)T(ph)TIR_	2	701.291	2121
Q64012	RNA-binding protein Raly	Raly	0.662181	2	S	1.8111e-05	DDGDEEGLLT(0.21)HS(0.662)EEELEHS(0.357)QDT(0.771)DAEDGALQ	_DDGDEEGLLTHS(ph)EEELEHSQDT(ph)DAEDGALQ_	3	1148.76	294
Q52KI8	Serine/arginine repetitive matrix protein 1	Srrm1	0.658752	4	S	0.000187414	GAS(1)AS(1)PQGRQS(0.994)PS(0.659)PS(0.185)T(0.162)RPIR	_GAS(ph)AS(ph)PQGRQS(ph)PS(ph)PSTRPIR_	3	786.313	733
Q9DBC3	Cap-specific mRNA (nucleoside-2'-O-)-methyltransferase 1	Ftsjd2	0.657027	2	T	0.0197924	HLS(0.472)S(0.6)T(0.657)S(0.271)DDEPLSSVNHAAK	_HLSS(ph)T(ph)SDDEPLSSVNHAAK_	3	718.963	29
Q8JZQ9	Eukaryotic translation initiation factor 3 subunit B	Eif3b	0.653781	2;3	S	2.78304e-08	AKPAAQS(0.654)EEET(0.335)AT(0.176)S(0.836)PAAS(0.966)PT(0.033)PQSAER	_AKPAAQS(ph)EEETATS(ph)PAAS(ph)PTPQSAER_	3	951.386	68
Q91XT4	Protein transport protein Sec16B	Sec16b	0.652637	2	S	0.000754348	VPS(0.001)FS(0.013)EDS(0.096)AAS(0.653)AKEDEEGS(0.617)S(0.617)DGADKPS(0.004)HPDASQK	_VPSFSEDSAAS(ph)AKEDEEGS(ph)SDGADKPSHPDASQK_	3	1208.15	866
O08582	GTP-binding protein 1	Gtpbp1	0.643105	2	S	2.23703e-08	S(0.118)RS(0.769)PVDS(0.114)PVPASMFAPEPS(0.643)S(0.357)PGAAR	_SRS(ph)PVDSPVPASMFAPEPS(ph)SPGAAR_	3	886.387	24
P35564	Calnexin	Canx	0.635946	2	T	7.18174e-67	QKS(1)DAEEDGVT(0.636)GS(0.364)QDEEDSKPK	_QKS(ph)DAEEDGVT(ph)GSQDEEDSKPK_	2	1269.99	561
Q7TSC1	Protein PRRC2A	Prrc2a	0.626156	2	T	7.50958e-09	TAS(0.012)ET(0.626)RS(0.496)EGS(0.866)EYEEIPKR	_TASET(ph)RSEGS(ph)EYEEIPKR_	3	743.642	1085
F8VPU2		Farp1	0.624258	2;3	S	2.83251e-08	S(0.001)PDEAT(0.02)AADQES(0.532)EDDLS(0.611)AS(0.624)RT(0.614)S(0.598)LER	_SPDEATAADQESEDDLSAS(ph)RT(ph)S(ph)LER_	3	974.032	899
K4DI58	Cell adhesion molecule 3	Cadm3	0.61438	2	T	0.0206985	PIIT(0.614)GY(0.451)KS(0.483)S(0.452)LR	_PIIT(ph)GYKS(ph)SLR_	2	697.828	168
Q501J7	Phosphatase and actin regulator 4	Phactr4	0.614	1	S	0.0326098	S(0.193)S(0.193)S(0.614)PVLVEEEPER	_SSS(ph)PVLVEEEPER_	2	769.343	118
F8VPU2		Farp1	0.613909	2;3	T	2.83251e-08	S(0.001)PDEAT(0.02)AADQES(0.532)EDDLS(0.611)AS(0.624)RT(0.614)S(0.598)LER	_SPDEATAADQESEDDLSAS(ph)RT(ph)S(ph)LER_	3	974.032	901
Q9JIK5	Nucleolar RNA helicase 2	Ddx21	0.613487	2	S	2.08876e-07	SNSSDAPGEES(0.529)S(0.613)S(0.613)ET(0.244)EKEIPVEQK	_SNSSDAPGEESS(ph)S(ph)ETEKEIPVEQK_	3	908.698	244
Q9JIK5	Nucleolar RNA helicase 2	Ddx21	0.613482	2	S	1.14575e-11	SNSSDAPGEES(0.529)S(0.613)S(0.613)ET(0.244)EKEIPVEQK	_SNSSDAPGEESS(ph)S(ph)ETEKEIPVEQK_	3	908.698	245
Q9Z1T1	AP-3 complex subunit beta-1	Ap3b1	0.612259	1	Y	0.0250737	NFY(0.612)ES(0.388)EEEEEEKEK	_NFY(ph)ESEEEEEEKEK_	3	633.579	274
Q8C1D8	Protein IWS1 homolog	Iws1	0.609682	4	S	2.20711e-05	VS(0.96)DS(0.973)ES(0.067)EDPPRPQAS(0.874)DS(0.61)ES(0.516)EELPKPR	_VS(ph)DS(ph)ESEDPPRPQAS(ph)DS(ph)ESEELPKPR_	3	1063.4	211
Q9DBC3	Cap-specific mRNA (nucleoside-2'-O-)-methyltransferase 1	Ftsjd2	0.599815	2	S	3.31706e-06	HLS(0.472)S(0.6)T(0.657)S(0.271)DDEPLSSVNHAAK	_HLSS(ph)T(ph)SDDEPLSSVNHAAK_	3	718.963	28
F8VPU2		Farp1	0.598254	3	S	0.0462956	S(0.001)PDEAT(0.02)AADQES(0.532)EDDLS(0.611)AS(0.624)RT(0.614)S(0.598)LER	_SPDEATAADQESEDDLSAS(ph)RT(ph)S(ph)LER_	3	974.032	902
P51125	Calpastatin	Cast	0.583776	1	T	7.82464e-06	EQKPFT(0.584)PAS(0.416)PVQSTPSKPSDK	_EQKPFT(ph)PASPVQSTPSKPSDK_	3	779.377	216
B9EJ86	Oxysterol-binding protein	Osbpl8	0.581057	1	S	8.27948e-07	MEAALADGEPDRS(0.581)S(0.417)LLGDS(0.002)K	_(ac)MEAALADGEPDRS(ph)SLLGDSK_	2	1092.48	13
Q3TIR3	Synembryn-A	Ric8a	0.58098	2	Y	0.0385702	GLMAGGRPEGQY(0.581)S(0.445)EDEDT(0.889)DT(0.083)EEY(0.002)R	_GLMAGGRPEGQY(ph)SEDEDT(ph)DTEEYR_	3	955.691	434
Q99KG5	Lipolysis-stimulated lipoprotein receptor	Lsr	0.574899	2	S	6.85993e-25	S(1)VDALDDINRPGS(0.039)T(0.033)ES(0.139)GRS(0.575)S(0.197)PPS(0.007)S(0.009)GR	_S(ph)VDALDDINRPGSTESGRS(ph)SPPSSGR_	3	935.401	454
Q8JZQ9	Eukaryotic translation initiation factor 3 subunit B	Eif3b	0.569871	1	T	4.93942e-54	AKPAAQSEEETAT(0.57)S(0.43)PAASPTPQSAER	_AKPAAQSEEETAT(ph)SPAASPTPQSAER_	2	1346.61	74
Q8BTI8	Serine/arginine repetitive matrix protein 2	Srrm2	0.566837	1	S	0.00502597	VS(0.567)S(0.433)PVLETVQQR	_VS(ph)SPVLETVQQR_	2	711.853	1359
P51859	Hepatoma-derived growth factor	Hdgf	0.562329	1	S	1.10218e-29	NST(0.437)PS(0.562)EPDSGQGPPAEEEEGEEEAAKEEAEAQGVR	_NSTPS(ph)EPDSGQGPPAEEEEGEEEAAKEEAEAQGVR_	3	1240.85	202
Q9R0P4	Small acidic protein	Smap	0.561994	1	S	1.19809e-10	RS(0.562)AS(0.438)PDDDLGSSNWEAADLGNEER	_RS(ph)ASPDDDLGSSNWEAADLGNEER_	3	891.035	15
E9Q983		Svil	0.558335	1	S	0.000942634	ARY(0.016)PS(0.425)GS(0.558)EIPVVEDEEKVDER	_ARYPSGS(ph)EIPVVEDEEKVDER_	3	828.715	262
P25446	Tumor necrosis factor receptor superfamily member 6	Fas	0.556019	3	S	0.000203631	T(0.491)S(0.556)S(0.683)RET(0.27)IPMNAS(0.001)NLS(0.926)LS(0.073)K	_TS(ph)S(ph)RETIPMNASNLS(ph)LSK_	2	1088.44	207
P62996	Transformer-2 protein homolog alpha	Tra2a	0.553547	2	Y	0.000721036	RRS(0.982)PS(0.422)PY(0.554)Y(0.006)S(0.037)R	_RRS(ph)PSPY(ph)YSR_	2	714.795	268
Q99KG5	Lipolysis-stimulated lipoprotein receptor	Lsr	0.553527	1	S	5.86612e-25	SVDALDDINRPGS(0.033)T(0.033)ES(0.121)GRS(0.259)S(0.554)PPS(0.001)S(0.001)GR	_SVDALDDINRPGSTESGRSS(ph)PPSSGR_	3	908.746	455
Q61033	Lamina-associated polypeptide 2, isoforms alpha/zeta	Tmpo	0.544349	2	S	0.00185324	S(0.544)S(0.544)T(0.911)PLPTVSSSAENTR	_S(ph)ST(ph)PLPTVSSSAENTR_	2	897.371	157
Q61033	Lamina-associated polypeptide 2, isoforms alpha/zeta	Tmpo	0.544349	2	S	0.00185324	S(0.544)S(0.544)T(0.911)PLPTVSSSAENTR	_S(ph)ST(ph)PLPTVSSSAENTR_	2	897.371	158
Q6ZPE2	Myotubularin-related protein 5	Sbf1	0.542195	2	S	0.00703895	YLQAVVS(0.542)S(0.542)MPRY(0.902)ADS(0.007)S(0.007)GR	_YLQAVVS(ph)SM(ox)PRY(ph)ADSSGR_	3	721.637	1250
Q6ZPE2	Myotubularin-related protein 5	Sbf1	0.542195	2	S	0.00703895	YLQAVVS(0.542)S(0.542)MPRY(0.902)ADS(0.007)S(0.007)GR	_YLQAVVS(ph)SM(ox)PRY(ph)ADSSGR_	3	721.637	1251
Q9Z239	Phospholemman	Fxyd1	0.527396	1	S	0.000561053	TGEPDEEEGT(0.053)FRS(0.419)S(0.527)IR	_TGEPDEEEGTFRSS(ph)IR_	2	945.399	83
Q8K2F8	Protein LSM14 homolog A	Lsm14a	0.517565	2	S	0.000658224	S(0.484)S(0.518)PQLDPLRKS(0.814)PT(0.181)MEQAVQT(0.003)AS(0.001)AHLPAPAPVGR	_SS(ph)PQLDPLRKS(ph)PTMEQAVQTASAHLPAPAPVGR_	4	900.188	183
E9Q5W5	Zinc finger ZZ-type and EF-hand domain-containing protein 1	Zzef1	0.514375	2	S	0.00139753	DLEILS(0.514)IMLY(0.457)S(0.514)S(0.514)KK	_DLEILS(ph)IM(ox)LYS(ph)SKK_	2	908.416	2375
E9Q5W5	Zinc finger ZZ-type and EF-hand domain-containing protein 1	Zzef1	0.514375	2	S	0.00139753	DLEILS(0.514)IMLY(0.457)S(0.514)S(0.514)KK	_DLEILS(ph)IM(ox)LYS(ph)SKK_	2	908.416	2376
Q60598	Src substrate cortactin	Cttn	0.5071	3	S	6.81048e-09	KQT(0.905)PPAS(0.15)PS(0.945)PQPIEDRPPS(0.507)S(0.476)PIY(0.018)EDAAPFK	_KQT(ph)PPASPS(ph)PQPIEDRPPS(ph)SPIYEDAAPFK_	4	872.637	417
F8VQC1		Srp72	0.505674	2	T	2.6106e-12	AVS(0.215)S(0.784)PPT(0.506)S(0.455)PRPGS(0.039)AAT(0.001)ISSSASNIVPPR	_AVSS(ph)PPT(ph)SPRPGSAATISSSASNIVPPR_	3	951.118	624
Q8BTI8	Serine/arginine repetitive matrix protein 2	Srrm2	0.504325	2	T	9.47193e-12	SSS(1)PVT(0.002)ELT(0.504)ARS(0.493)PVKQDK	_SSS(ph)PVTELT(ph)ARSPVKQDK_	3	697.324	1074
B2RXQ2		Ppfia1	0.501185	2	S	0.000500137	S(0.501)S(0.501)DGS(0.991)LS(0.006)HEDLAK	_S(ph)SDGS(ph)LSHEDLAK_	2	753.281	238
Q9D4C5	ELL-associated factor 1	Eaf1	0.500341	2	S	0.00128137	T(0.5)S(0.5)PLKDNPS(0.999)PEPQLDDIKR	_T(ph)SPLKDNPS(ph)PEPQLDDIKR_	3	770.685	158
Q9D4C5	ELL-associated factor 1	Eaf1	0.500341	2	T	0.00128137	T(0.5)S(0.5)PLKDNPS(0.999)PEPQLDDIKR	_T(ph)SPLKDNPS(ph)PEPQLDDIKR_	3	770.685	157
Q3UHJ0	AP2-associated protein kinase 1	Aak1	0.500083	2	S	0.00193103	VGSLT(1)PPS(0.5)S(0.5)PK	_VGSLT(ph)PPS(ph)SPK_	2	615.264	621
Q3UHJ0	AP2-associated protein kinase 1	Aak1	0.500083	2	S	0.00193103	VGSLT(1)PPS(0.5)S(0.5)PK	_VGSLT(ph)PPS(ph)SPK_	2	615.264	622
Q3B7Z2	Oxysterol-binding protein 1	Osbp	0.500006	2	S	2.35372e-09	T(0.5)GS(0.5)NIS(1)GASSDVSLDEQYK	_T(ph)GSNIS(ph)GASSDVSLDEQYK_	2	1059.42	377
Q3B7Z2	Oxysterol-binding protein 1	Osbp	0.500006	2	T	2.35372e-09	T(0.5)GS(0.5)NIS(1)GASSDVSLDEQYK	_T(ph)GSNIS(ph)GASSDVSLDEQYK_	2	1059.42	375
D6RCX5		Fam54b	0.500002	2	S	0.0254417	S(1)QIAKIVAADAVT(0.5)S(0.5)PRR	_S(ph)QIAKIVAADAVT(ph)SPRR_	2	971.979	150
Q9QY15	ATP-dependent RNA helicase DDX25	Ddx25	0.5	1	Y	0.0271892	QY(0.5)Y(0.5)VLCENR	_QY(ph)YVLCENR_	2	634.262	316
Q9QY15	ATP-dependent RNA helicase DDX25	Ddx25	0.5	1	Y	0.0271892	QY(0.5)Y(0.5)VLCENR	_QY(ph)YVLCENR_	2	634.262	317
E9Q0N0	Intersectin-1	Itsn1	0.499999	1	S	3.28732e-12	S(0.5)GS(0.5)GMSVISSSSVDQR	_S(ph)GSGMSVISSSSVDQR_	2	832.353	313
E9Q0N0	Intersectin-1	Itsn1	0.499999	1	S	3.28732e-12	S(0.5)GS(0.5)GMSVISSSSVDQR	_S(ph)GSGMSVISSSSVDQR_	2	832.353	315
Q8BNA6	Protocadherin Fat 3	Fat3	0.499984	1	S	0.0419571	GNVKESDPPGEVVAVLS(0.5)T(0.5)LDK	_GNVKESDPPGEVVAVLS(ph)TLDK_	2	1117.55	2946
Q6DFZ1		Gbf1	0.499675		S	1.02144e-33	ADAPDAGAQS(0.5)DS(0.5)ELPS(0.001)YHQNDVSLDR	_ADAPDAGAQS(ph)DSELPSYHQNDVSLDR_	3	946.733	1298
Q6DFZ1		Gbf1	0.499675		S	1.02144e-33	ADAPDAGAQS(0.5)DS(0.5)ELPS(0.001)YHQNDVSLDR	_ADAPDAGAQS(ph)DSELPSYHQNDVSLDR_	3	946.733	1300
F8VPU2		Farp1	0.499056	3	S	2.83251e-08	SPDEATAADQES(0.089)EDDLS(0.499)AS(0.499)RT(0.499)S(0.414)LER	_SPDEATAADQESEDDLS(ph)AS(ph)RTSLER_	3	947.376	897
Q02248	Catenin beta-1	Ctnnb1	0.499003		T	0.00131408	T(0.499)S(0.499)MGGT(0.002)QQQFVEGVR	_T(ph)SMGGTQQQFVEGVR_	2	852.874	551
Q922Y1	UBX domain-containing protein 1	Ubxn1	0.498827		S	1.29646e-06	S(0.499)S(0.499)PPAT(0.002)DPGPVPSSPSQEPPTKR	_S(ph)SPPATDPGPVPSSPSQEPPTKR_	3	799.376	187
Q922Y1	UBX domain-containing protein 1	Ubxn1	0.498827		S	1.29646e-06	S(0.499)S(0.499)PPAT(0.002)DPGPVPSSPSQEPPTKR	_S(ph)SPPATDPGPVPSSPSQEPPTKR_	3	799.376	188
O54774	AP-3 complex subunit delta-1	Ap3d1	0.498041		S	0.0345457	RHS(0.498)S(0.454)LPT(0.184)ES(0.864)DEDIAPAQR	_RHS(ph)SLPTES(ph)DEDIAPAQR_	3	723.639	754
D3YUX2	Multiple PDZ domain protein	Mpdz	0.497197		S	1.15877e-06	RPS(0.421)QS(0.467)S(0.479)QVS(0.497)ES(0.497)S(0.497)LS(0.497)S(0.497)FT(0.147)PPLSGINTSESLESNSK	_RPSQSS(ph)QVS(ph)ES(ph)S(ph)LSSFTPPLSGINTSESLESNSK_	3	1292.2	1810
D3YUX2	Multiple PDZ domain protein	Mpdz	0.497193		S	1.15877e-06	RPS(0.421)QS(0.467)S(0.479)QVS(0.497)ES(0.497)S(0.497)LS(0.497)S(0.497)FT(0.147)PPLSGINTSESLESNSK	_RPSQSS(ph)QVS(ph)ES(ph)S(ph)LSSFTPPLSGINTSESLESNSK_	3	1292.2	1812
D3YUX2	Multiple PDZ domain protein	Mpdz	0.497193		S	1.15877e-06	RPS(0.421)QS(0.467)S(0.479)QVS(0.497)ES(0.497)S(0.497)LS(0.497)S(0.497)FT(0.147)PPLSGINTSESLESNSK	_RPSQSS(ph)QVS(ph)ES(ph)S(ph)LSSFTPPLSGINTSESLESNSK_	3	1292.2	1813
D3YUX2	Multiple PDZ domain protein	Mpdz	0.497193		S	1.15877e-06	RPS(0.421)QS(0.467)S(0.479)QVS(0.497)ES(0.497)S(0.497)LS(0.497)S(0.497)FT(0.147)PPLSGINTSESLESNSK	_RPSQSS(ph)QVS(ph)ES(ph)S(ph)LSSFTPPLSGINTSESLESNSK_	3	1292.2	1815
D3YUX2	Multiple PDZ domain protein	Mpdz	0.497193		S	1.15877e-06	RPS(0.421)QS(0.467)S(0.479)QVS(0.497)ES(0.497)S(0.497)LS(0.497)S(0.497)FT(0.147)PPLSGINTSESLESNSK	_RPSQSS(ph)QVS(ph)ES(ph)S(ph)LSSFTPPLSGINTSESLESNSK_	3	1292.2	1816
Q00PI9	Heterogeneous nuclear ribonucleoprotein U-like protein 2	Hnrnpul2	0.495754		S	5.49135e-07	S(0.496)KS(0.496)PPPPEEEAKDEEEDQT(0.008)LVNLDTYTSDLHFQISK	_S(ph)KSPPPPEEEAKDEEEDQTLVNLDTYTSDLHFQISK_	4	1049.98	224
Q00PI9	Heterogeneous nuclear ribonucleoprotein U-like protein 2	Hnrnpul2	0.495754		S	5.49135e-07	S(0.496)KS(0.496)PPPPEEEAKDEEEDQT(0.008)LVNLDTYTSDLHFQISK	_S(ph)KSPPPPEEEAKDEEEDQTLVNLDTYTSDLHFQISK_	4	1049.98	226
Q3TMP1		Gtf3c3	0.491712		S	0.0235598	GKS(0.492)S(0.492)PKENPDDS(0.017)EVPSSSGIDSAK	_GKS(ph)SPKENPDDSEVPSSSGIDSAK_	3	833.369	42
Q3TMP1		Gtf3c3	0.491712		S	0.0235598	GKS(0.492)S(0.492)PKENPDDS(0.017)EVPSSSGIDSAK	_GKS(ph)SPKENPDDSEVPSSSGIDSAK_	3	833.369	43
Q8JZQ9	Eukaryotic translation initiation factor 3 subunit B	Eif3b	0.491656		S	0.000420277	AKPAAQS(0.025)EEET(0.084)AT(0.3)S(0.593)PAAS(0.778)PT(0.227)PQS(0.492)AERS(0.392)PS(0.102)QEPS(0.008)APGK	_AKPAAQSEEETATS(ph)PAAS(ph)PTPQS(ph)AERSPSQEPSAPGK_	4	980.168	84
A2AVT5		Olfr1164	0.490679		S	0.0416755	KAFS(0.019)T(0.491)CAS(0.491)HLK	_KAFST(ph)CASHLK_	2	636.794	255
K4DI58	Cell adhesion molecule 3	Cadm3	0.483152		S	0.0206985	PIIT(0.614)GY(0.451)KS(0.483)S(0.452)LR	_PIIT(ph)GYKS(ph)SLR_	2	697.828	172
Q5UAK0	Mesoderm induction early response protein 1	Mier1	0.482092		S	0.028534	INS(0.839)S(0.482)GKES(0.482)PGS(0.143)S(0.054)EFFQEAVSHGK	_INS(ph)S(ph)GKESPGSSEFFQEAVSHGK_	3	857.026	483
Q5UAK0	Mesoderm induction early response protein 1	Mier1	0.482092		S	0.028534	INS(0.839)S(0.482)GKES(0.482)PGS(0.143)S(0.054)EFFQEAVSHGK	_INS(ph)S(ph)GKESPGSSEFFQEAVSHGK_	3	857.026	487
D3YUX2	Multiple PDZ domain protein	Mpdz	0.479198		S	1.15877e-06	RPS(0.421)QS(0.467)S(0.479)QVS(0.497)ES(0.497)S(0.497)LS(0.497)S(0.497)FT(0.147)PPLSGINTSESLESNSK	_RPSQSS(ph)QVS(ph)ES(ph)S(ph)LSSFTPPLSGINTSESLESNSK_	3	1292.2	1807
Q6Y7W8	PERQ amino acid-rich with GYF domain-containing protein 2	Gigyf2	0.465543		T	6.81983e-09	AGAEASEEVPQT(0.008)S(0.164)LS(0.098)S(0.098)ARPGT(0.466)PS(0.098)DHQPQEAT(0.069)QFER	_AGAEASEEVPQTSLSSARPGT(ph)PSDHQPQEATQFER_	4	944.676	383
Q9CQ73		Pkp2	0.462622		S	0.00855584	LEIS(0.075)PDS(0.463)S(0.463)PER	_LEISPDS(ph)SPER_	2	655.287	154
Q8VDP4	DBIRD complex subunit KIAA1967 homolog		0.456814		S	0.0154543	VSKDEVQNEGT(0.157)AAES(0.457)DS(0.386)PLKEDGLLPK	_VSKDEVQNEGTAAES(ph)DSPLKEDGLLPK_	3	979.464	610
F8VQC1		Srp72	0.453498		S	0.000442977	AVS(0.453)S(0.425)PPT(0.428)S(0.428)PRPGS(0.127)AAT(0.127)IS(0.007)S(0.002)S(0.001)ASNIVPPR	_AVS(ph)S(ph)PPTSPRPGSAATISSSASNIVPPR_	4	713.59	620
Q64012	RNA-binding protein Raly	Raly	0.452073		S	1.8111e-05	DDGDEEGLLT(0.091)HS(0.452)EEELEHS(0.452)QDT(0.005)DAEDGALQ	_DDGDEEGLLTHS(ph)EEELEHSQDTDAEDGALQ_	3	1122.11	301
K4DI58	Cell adhesion molecule 3	Cadm3	0.45195		S	0.0206985	PIIT(0.614)GY(0.451)KS(0.483)S(0.452)LR	_PIIT(ph)GYKS(ph)SLR_	2	697.828	173
Q99KG5	Lipolysis-stimulated lipoprotein receptor	Lsr	0.444917		S	0.010235	SVDALDDINRPGS(0.78)T(0.164)ES(0.161)GRS(0.209)S(0.194)PPS(0.046)S(0.445)GR	_SVDALDDINRPGS(ph)TESGRSSPPSS(ph)GR_	3	935.401	459
O09173	Homogentisate 1,2-dioxygenase	Hgd	0.430487		T	0.0231792	SHFT(0.001)PNS(0.284)RS(0.284)PT(0.43)EPK	_SHFTPNSRSPT(ph)EPK_	3	555.586	442
E9QN52	Leucine-rich repeat flightless-interacting protein 2	Lrrfip2	0.409623		T	0.00345097	RGS(0.34)GDT(0.41)S(0.125)S(0.125)LIDPDTSLSELR	_RGSGDT(ph)SSLIDPDTSLSELR_	3	729.337	114
Q6Y7W8	PERQ amino acid-rich with GYF domain-containing protein 2	Gigyf2	0.408123		S	0.0301122	ALS(0.278)S(0.316)GGS(0.408)IT(0.207)S(0.809)PPLS(0.983)PALPK	_ALSSGGS(ph)ITS(ph)PPLS(ph)PALPK_	2	1010.45	23
Q80U38	Protein KHNYN	Khnyn	0.378157		S	0.0231114	S(0.378)PAVRGQS(0.311)HT(0.311)VEK	_S(ph)PAVRGQSHTVEK_	2	738.354	241
Q6ZQ58	La-related protein 1	Larp1	0.363609		S	0.000107676	VEPAWHDQDET(0.348)S(0.351)S(0.364)VKS(0.938)DGAGGAR	_VEPAWHDQDETSS(ph)VKS(ph)DGAGGAR_	3	853.678	299
P25446	Tumor necrosis factor receptor superfamily member 6	Fas	0.356904		T	0.0011085	T(0.188)S(0.213)S(0.242)RET(0.357)IPMNAS(0.009)NLS(0.842)LS(0.149)K	_TSSRET(ph)IPMNASNLS(ph)LSK_	3	699.309	211
E9PWQ3		Col6a3	0.333333		S	0.00761947	LSDAGIT(0.333)PLFLT(0.333)S(0.333)QEDR	_LSDAGIT(ph)PLFLTSQEDR_	2	971.962	2542
Q8BKK5	Zinc finger protein 689	Znf689	0.333333		S	0.0430863	PLIGGPS(0.333)QRS(0.333)S(0.333)AL	_PLIGGPS(ph)QRSSAL_	2	681.842	494
Q8BKK5	Zinc finger protein 689	Znf689	0.333333		S	0.0430863	PLIGGPS(0.333)QRS(0.333)S(0.333)AL	_PLIGGPS(ph)QRSSAL_	2	681.842	497
Q8BKK5	Zinc finger protein 689	Znf689	0.333333		S	0.0430863	PLIGGPS(0.333)QRS(0.333)S(0.333)AL	_PLIGGPS(ph)QRSSAL_	2	681.842	498
E9PWQ3		Col6a3	0.333333		T	0.00761947	LSDAGIT(0.333)PLFLT(0.333)S(0.333)QEDR	_LSDAGIT(ph)PLFLTSQEDR_	2	971.962	2536
E9PWQ3		Col6a3	0.333333		T	0.00761947	LSDAGIT(0.333)PLFLT(0.333)S(0.333)QEDR	_LSDAGIT(ph)PLFLTSQEDR_	2	971.962	2541
P70398	Probable ubiquitin carboxyl-terminal hydrolase FAF-X	Usp9x	0.328057		S	0.0340824	NGILAIEGT(0.328)GS(0.328)DVDDDMS(0.328)GDEKQDNES(0.016)NVDPR	_NGILAIEGT(ph)GSDVDDDMSGDEKQDNESNVDPR_	3	1158.15	1593
P70398	Probable ubiquitin carboxyl-terminal hydrolase FAF-X	Usp9x	0.328057		S	0.0340824	NGILAIEGT(0.328)GS(0.328)DVDDDMS(0.328)GDEKQDNES(0.016)NVDPR	_NGILAIEGT(ph)GSDVDDDMSGDEKQDNESNVDPR_	3	1158.15	1600

## Sheet: Sheet2-commercial TiO2
Phosphopeptide identifications in mouse liver. Protein and phosphorylation site identification was performed by MaxQuant with integrated Andromeda search engine (v. 1.3.0.5). Tandem mass spectra were searched against Uniprot mouse reference proteome database (44455 sequences) concatenated with reverse decoy database and protein sequences of common contaminants. Trypsin/P was specified as cleavage…
Protein	Protein name	Gene name	Localization prob	Number of Phospho (STY)	Amino acid	PEP	Phospho (STY) Probabilities	Modified sequence	Charge	m/z	Position
Q8K310	Matrin-3	Matr3	0.999966	2	S	8.33124e-19	SYS(1)PDGKES(0.982)PS(0.018)DKK	_SYS(ph)PDGKES(ph)PSDKK_	2	842.829	598
Q8K310	Matrin-3	Matr3	0.981564	2	S	8.33124e-19	SYS(1)PDGKES(0.982)PS(0.018)DKK	_SYS(ph)PDGKES(ph)PSDKK_	2	842.829	604
A0A087WRM5			1	3;4	S	3.94761e-06	APPPKEVEEDS(1)EDEEMS(1)EDEDDS(1)S(1)GEEEVVIPQKK	_APPPKEVEEDS(ph)EDEEMS(ph)EDEDDS(ph)S(ph)GEEEVVIPQKK_	3	1417.86	12
A0A087WRM5			1	3;4	S	3.94761e-06	APPPKEVEEDS(1)EDEEMS(1)EDEDDS(1)S(1)GEEEVVIPQKK	_APPPKEVEEDS(ph)EDEEMS(ph)EDEDDS(ph)S(ph)GEEEVVIPQKK_	3	1417.86	18
A0A087WRM5			1	3;4	S	3.94761e-06	APPPKEVEEDS(1)EDEEMS(1)EDEDDS(1)S(1)GEEEVVIPQKK	_APPPKEVEEDS(ph)EDEEMS(ph)EDEDDS(ph)S(ph)GEEEVVIPQKK_	3	1417.86	24
A0A087WRM5			1	3;4	S	3.94761e-06	APPPKEVEEDS(1)EDEEMS(1)EDEDDS(1)S(1)GEEEVVIPQKK	_APPPKEVEEDS(ph)EDEEMS(ph)EDEDDS(ph)S(ph)GEEEVVIPQKK_	3	1417.86	25
P63166	Small ubiquitin-related modifier 1	Sumo1	1	1	S	6.73566e-23	S(1)DQEAKPSTEDLGDKK	_(ac)S(ph)DQEAKPSTEDLGDKK_	2	935.409	2
Q80XU3	Nuclear ubiquitous casein and cyclin-dependent kinase substrate 1	Nucks1	1	2;3	S	0.000191217	KDDS(1)HS(1)AEDS(1)EDEKDDHK	_KDDS(ph)HS(ph)AEDS(ph)EDEKDDHK_	3	776.252	73
Q80XU3	Nuclear ubiquitous casein and cyclin-dependent kinase substrate 1	Nucks1	1	2;3	S	1.268e-20	KDDS(1)HS(1)AEDS(1)EDEKDDHK	_KDDS(ph)HS(ph)AEDS(ph)EDEKDDHK_	3	776.252	75
Q80XU3	Nuclear ubiquitous casein and cyclin-dependent kinase substrate 1	Nucks1	1	2;3	S	1.268e-20	KDDS(1)HS(1)AEDS(1)EDEKDDHK	_KDDS(ph)HS(ph)AEDS(ph)EDEKDDHK_	3	776.252	79
Q80XU3	Nuclear ubiquitous casein and cyclin-dependent kinase substrate 1	Nucks1	1	2	S	3.68858e-36	NSQEDS(1)EDS(1)EEKDVK	_NSQEDS(ph)EDS(ph)EEKDVK_	2	949.832	58
Q80XU3	Nuclear ubiquitous casein and cyclin-dependent kinase substrate 1	Nucks1	1	2	S	3.68858e-36	SGKNSQEDS(1)EDS(1)EEKDVK	_SGKNSQEDS(ph)EDS(ph)EEKDVK_	2	1085.91	61
Q80XU3	Nuclear ubiquitous casein and cyclin-dependent kinase substrate 1	Nucks1	0.99156	1	S	0.00193961	T(0.004)PS(0.004)PKEEDEEAES(0.992)PPEKK	_TPSPKEEDEEAES(ph)PPEKK_	3	702.975	214
Q80XU3	Nuclear ubiquitous casein and cyclin-dependent kinase substrate 1	Nucks1	0.998379	1	S	5.18382e-06	VVDY(0.001)S(0.001)QFQES(0.998)DDADEDYGR	_VVDYSQFQES(ph)DDADEDYGR_	2	1159.44	19
O70251	Elongation factor 1-beta	Eef1b	0.999573	1	S	1.04978e-40	YGPSSVEDTTGSGAADAKDDDDIDLFGS(1)DDEEESEEAK	_YGPSSVEDTTGSGAADAKDDDDIDLFGS(ph)DDEEESEEAK_	3	1349.53	106
A2A7S8	Uncharacterized protein KIAA1522	Kiaa1522	0.996672	1	S	2.0683e-27	GS(0.997)PS(0.003)GGSTAETSDTASIR	_GS(ph)PSGGSTAETSDTASIR_	2	880.87	402
Q52KI8	Serine/arginine repetitive matrix protein 1	Srrm1	0.999885	1	S	0.00254403	EKS(1)PELPEPSVR	_EKS(ph)PELPEPSVR_	2	724.345	220
Q52KI8	Serine/arginine repetitive matrix protein 1	Srrm1	1	3;4	S	3.09061e-07	GAS(1)AS(1)PQGRQS(1)PS(0.927)PS(0.038)T(0.035)RPIR	_GAS(ph)AS(ph)PQGRQS(ph)PS(ph)PSTRPIR_	3	786.313	723
Q52KI8	Serine/arginine repetitive matrix protein 1	Srrm1	0.999999	3;4	S	3.09061e-07	GAS(1)AS(1)PQGRQS(1)PS(0.927)PS(0.038)T(0.035)RPIR	_GAS(ph)AS(ph)PQGRQS(ph)PS(ph)PSTRPIR_	3	786.313	725
Q52KI8	Serine/arginine repetitive matrix protein 1	Srrm1	0.999507	3;4	S	3.09061e-07	GAS(1)AS(1)PQGRQS(1)PS(0.927)PS(0.038)T(0.035)RPIR	_GAS(ph)AS(ph)PQGRQS(ph)PS(ph)PSTRPIR_	3	786.313	731
Q52KI8	Serine/arginine repetitive matrix protein 1	Srrm1	0.927362	4	S	3.09061e-07	GAS(1)AS(1)PQGRQS(1)PS(0.927)PS(0.038)T(0.035)RPIR	_GAS(ph)AS(ph)PQGRQS(ph)PS(ph)PSTRPIR_	3	786.313	733
Q52KI8	Serine/arginine repetitive matrix protein 1	Srrm1	0.596349	2	S	6.12065e-05	HRPS(0.596)S(0.441)PAT(0.962)PPPK	_HRPS(ph)SPAT(ph)PPPK_	2	716.313	400
Q52KI8	Serine/arginine repetitive matrix protein 1	Srrm1	0.531833	2	S	0.0430915	HRPS(0.472)S(0.532)PAT(0.996)PPPK	_HRPSS(ph)PAT(ph)PPPK_	3	477.878	401
Q52KI8	Serine/arginine repetitive matrix protein 1	Srrm1	1	1;2	S	4.80307e-244	KET(1)ES(1)EAEDDNLDDLER	_KET(ph)ES(ph)EAEDDNLDDLER_	2	1084.4	915
Q52KI8	Serine/arginine repetitive matrix protein 1	Srrm1	0.987979	3	S	0.00661103	KPPAPPS(0.988)PVQS(0.402)QS(0.402)PS(0.402)T(0.392)NWS(0.414)PAVPAK	_KPPAPPS(ph)PVQS(ph)QS(ph)PSTNWSPAVPAK_	3	932.413	810
Q52KI8	Serine/arginine repetitive matrix protein 1	Srrm1	0.499595		S	0.00661103	KPPAPPS(0.927)PVQS(0.5)QS(0.5)PS(0.24)T(0.231)NWS(0.602)PAVPAKK	_KPPAPPS(ph)PVQS(ph)QSPSTNWS(ph)PAVPAKK_	3	975.111	814
Q52KI8	Serine/arginine repetitive matrix protein 1	Srrm1	0.499676		S	0.00661103	KPPAPPS(0.927)PVQS(0.5)QS(0.5)PS(0.24)T(0.231)NWS(0.602)PAVPAKK	_KPPAPPS(ph)PVQS(ph)QSPSTNWS(ph)PAVPAKK_	3	975.111	816
Q52KI8	Serine/arginine repetitive matrix protein 1	Srrm1	0.602086	3	S	0.0212217	KPPAPPS(0.927)PVQS(0.5)QS(0.5)PS(0.24)T(0.231)NWS(0.602)PAVPAKK	_KPPAPPS(ph)PVQS(ph)QSPSTNWS(ph)PAVPAKK_	3	975.111	822
Q52KI8	Serine/arginine repetitive matrix protein 1	Srrm1	1	2	S	7.82659e-10	KVELS(1)ES(1)EEDKGSK	_KVELS(ph)ES(ph)EEDKGSK_	2	862.855	461
Q52KI8	Serine/arginine repetitive matrix protein 1	Srrm1	0.999973	2	S	7.82659e-10	KVELS(1)ES(1)EEDKGSK	_KVELS(ph)ES(ph)EEDKGSK_	2	862.855	463
Q52KI8	Serine/arginine repetitive matrix protein 1	Srrm1	1	1;2	S	3.24859e-09	RES(1)PS(1)PAPKPR	_RES(ph)PS(ph)PAPKPR_	2	691.305	448
Q52KI8	Serine/arginine repetitive matrix protein 1	Srrm1	1	2	S	3.24859e-09	RES(1)PS(1)PAPKPR	_RES(ph)PS(ph)PAPKPR_	2	691.305	450
Q52KI8	Serine/arginine repetitive matrix protein 1	Srrm1	1	2	S	0.00831733	RHS(1)PS(1)PRPR	_RHS(ph)PS(ph)PRPR_	2	625.271	702
Q52KI8	Serine/arginine repetitive matrix protein 1	Srrm1	1	2	S	0.00831733	RHS(1)PS(1)PRPR	_RHS(ph)PS(ph)PRPR_	2	625.271	704
Q52KI8	Serine/arginine repetitive matrix protein 1	Srrm1	1	2;3	S	0.000138224	RLS(1)PS(1)AS(1)PPR	_RLS(ph)PS(ph)AS(ph)PPR_	2	654.251	387
Q52KI8	Serine/arginine repetitive matrix protein 1	Srrm1	1	3	S	0.000138224	RLS(1)PS(1)AS(1)PPR	_RLS(ph)PS(ph)AS(ph)PPR_	2	654.251	389
Q52KI8	Serine/arginine repetitive matrix protein 1	Srrm1	1	2;3	S	0.000138224	RLS(1)PS(1)AS(1)PPR	_RLS(ph)PS(ph)AS(ph)PPR_	2	654.251	391
Q52KI8	Serine/arginine repetitive matrix protein 1	Srrm1	0.985242	2	S	0.0397047	RRS(0.985)PS(0.887)LS(0.114)S(0.014)K	_RRS(ph)PS(ph)LSSK_	2	589.26	672
Q52KI8	Serine/arginine repetitive matrix protein 1	Srrm1	0.887342	2	S	0.0397047	RRS(0.985)PS(0.887)LS(0.114)S(0.014)K	_RRS(ph)PS(ph)LSSK_	2	589.26	674
Q52KI8	Serine/arginine repetitive matrix protein 1	Srrm1	1	2	S	1.64345e-06	S(1)PS(1)PAPPPPPPPPPPR	_S(ph)PS(ph)PAPPPPPPPPPPR_	2	872.897	572
Q52KI8	Serine/arginine repetitive matrix protein 1	Srrm1	1	2	S	1.64345e-06	S(1)PS(1)PAPPPPPPPPPPR	_S(ph)PS(ph)PAPPPPPPPPPPR_	2	872.897	574
Q52KI8	Serine/arginine repetitive matrix protein 1	Srrm1	1	2	S	0.00420519	RRS(1)PS(1)PPPAR	_RRS(ph)PS(ph)PPPAR_	2	640.787	561
Q52KI8	Serine/arginine repetitive matrix protein 1	Srrm1	1	2	S	0.00420519	RRS(1)PS(1)PPPAR	_RRS(ph)PS(ph)PPPAR_	2	640.787	563
Q52KI8	Serine/arginine repetitive matrix protein 1	Srrm1	1	2	S	0.00922742	RVS(1)HS(1)PPPK	_RVS(ph)HS(ph)PPPK_	2	582.752	655
Q52KI8	Serine/arginine repetitive matrix protein 1	Srrm1	1	2	S	0.00922742	RVS(1)HS(1)PPPK	_RVS(ph)HS(ph)PPPK_	2	582.752	657
Q52KI8	Serine/arginine repetitive matrix protein 1	Srrm1	1	2	S	0.00228558	RVS(1)RT(1)PEPK	_RVS(ph)RT(ph)PEPK_	2	615.276	743
Q52KI8	Serine/arginine repetitive matrix protein 1	Srrm1	0.999872	2	S	0.00355209	RYS(1)PS(1)PPPK	_RYS(ph)PS(ph)PPPK_	2	594.746	624
Q52KI8	Serine/arginine repetitive matrix protein 1	Srrm1	0.999966	2	S	0.00355209	RYS(1)PS(1)PPPK	_RYS(ph)PS(ph)PPPK_	2	594.746	626
Q52KI8	Serine/arginine repetitive matrix protein 1	Srrm1	1	2	S	0.0106876	T(1)AS(1)PPPPPKR	_T(ph)AS(ph)PPPPPKR_	2	604.267	635
Q52KI8	Serine/arginine repetitive matrix protein 1	Srrm1	0.955759	1	S	0.00500535	T(0.026)RHS(0.956)PT(0.018)PQQSNR	_TRHS(ph)PTPQQSNR_	3	496.895	412
A2AFQ0	E3 ubiquitin-protein ligase HUWE1	Huwe1	0.865801	1	S	0.00557921	GS(0.077)GT(0.057)AS(0.866)DDEFENLR	_GSGTAS(ph)DDEFENLR_	2	789.309	1907
A2AIX1		Sec16a	0.992002	2	S	6.00924e-06	GS(0.992)PVRHS(0.993)PPELS(0.015)QEEFGESFADPGSSR	_GS(ph)PVRHS(ph)PPELSQEEFGESFADPGSSR_	3	1016.09	2053
A2AIX1		Sec16a	0.993374	2	S	6.00924e-06	GS(0.992)PVRHS(0.993)PPELS(0.015)QEEFGESFADPGSSR	_GS(ph)PVRHS(ph)PPELSQEEFGESFADPGSSR_	3	1016.09	2058
A7TU71	Protein Shroom2	Shroom2	0.600607	2	S	0.00768066	S(0.544)RS(0.601)S(0.601)PS(0.115)T(0.115)DHY(0.016)S(0.009)QEVPVEPNR	_SRS(ph)S(ph)PSTDHYSQEVPVEPNR_	3	811.335	959
A7TU71	Protein Shroom2	Shroom2	0.600607	2	S	0.00768066	S(0.544)RS(0.601)S(0.601)PS(0.115)T(0.115)DHY(0.016)S(0.009)QEVPVEPNR	_SRS(ph)S(ph)PSTDHYSQEVPVEPNR_	3	811.335	960
A2AP58		Spnb5	1	2	S	0.0267958	LEDKS(1)QALAS(1)K	_LEDKS(ph)QALAS(ph)K_	2	675.291	582
A2AP58		Spnb5	1	2	S	0.0267958	LEDKS(1)QALAS(1)K	_LEDKS(ph)QALAS(ph)K_	2	675.291	587
Q9D6Z1	Nucleolar protein 56	Nop56	1	1;2;3	S	3.02923e-18	EEVAS(1)EPEEAAS(0.792)PT(0.165)T(0.043)PK	_EEVAS(ph)EPEEAAS(ph)PTTPK_	2	966.382	536
Q9D6Z1	Nucleolar protein 56	Nop56	0.792257	2;3	S	3.02923e-18	EEVAS(1)EPEEAAS(0.792)PT(0.165)T(0.043)PK	_EEVAS(ph)EPEEAAS(ph)PTTPK_	2	966.382	543
Q9D6Z1	Nucleolar protein 56	Nop56	0.549998	3	S	0.013424	KS(0.518)S(0.55)PKEEVAS(0.931)EPEEAAS(0.625)PT(0.182)T(0.194)PK	_KSS(ph)PKEEVAS(ph)EPEEAAS(ph)PTTPK_	3	847.015	529
Q9CZ44	NSFL1 cofactor p47	Nsfl1c	1	1	S	0.0154283	KS(1)PNELVDDLFK	_KS(ph)PNELVDDLFK_	2	742.855	114
P16254	Signal recognition particle 14 kDa protein	Srp14	0.990823	1	S	5.82716e-16	KS(0.009)S(0.991)VEGLEPAENK	_KSS(ph)VEGLEPAENK_	2	734.34	45
Q08943	FACT complex subunit SSRP1	Ssrp1	0.999954	1	S	4.38369e-09	EGINPGYDDYADS(1)DEDQHDAYLER	_EGINPGYDDYADS(ph)DEDQHDAYLER_	3	956.37	444
Q3UJU9	Regulator of microtubule dynamics protein 3	Fam82a2	0.999887	1;2	S	2.11176e-68	SHS(1)LPNSLDYAQASER	_SHS(ph)LPNSLDYAQASER_	2	927.905	46
Q3UJU9	Regulator of microtubule dynamics protein 3	Fam82a2	0.999906	2	S	7.93434e-09	S(0.106)HS(0.894)LPNS(1)LDYAQASER	_SHS(ph)LPNS(ph)LDYAQASER_	2	967.888	50
O88343	Electrogenic sodium bicarbonate cotransporter 1	Slc4a4	0.981507	2	S	0.00592182	ERS(0.982)S(0.943)T(0.075)FLER	_ERS(ph)S(ph)TFLER_	2	642.755	1069
O88343	Electrogenic sodium bicarbonate cotransporter 1	Slc4a4	0.943216	2	S	0.00592182	ERS(0.982)S(0.943)T(0.075)FLER	_ERS(ph)S(ph)TFLER_	2	642.755	1070
Q99N57	RAF proto-oncogene serine/threonine-protein kinase	Raf1	0.998118	1	S	0.00183794	S(0.002)AS(0.998)EPSLHR	_SAS(ph)EPSLHR_	2	532.232	621
E9PV45	Ubiquitin carboxyl-terminal hydrolase	Usp24	0.998476	1	S	0.028762	VS(0.002)DQNS(0.998)PVLPK	_VSDQNS(ph)PVLPK_	2	632.303	2045
B2RS19		Max	1	2	S	0.000168595	S(1)DNDDIEVES(1)DEEQPR	_(ac)S(ph)DNDDIEVES(ph)DEEQPR_	2	1039.86	2
B2RS19		Max	1	2	S	0.000168595	S(1)DNDDIEVES(1)DEEQPR	_(ac)S(ph)DNDDIEVES(ph)DEEQPR_	2	1039.86	11
B2RXQ2		Ppfia1	0.538827	2	S	0.000676077	S(0.539)S(0.539)DGS(0.896)LS(0.026)HEDLAK	_S(ph)SDGS(ph)LSHEDLAK_	2	753.281	238
B2RXQ2		Ppfia1	0.538827	2	S	0.000676077	S(0.539)S(0.539)DGS(0.896)LS(0.026)HEDLAK	_S(ph)SDGS(ph)LSHEDLAK_	2	753.281	239
B2RXQ2		Ppfia1	0.896328	2	S	0.000676077	S(0.539)S(0.539)DGS(0.896)LS(0.026)HEDLAK	_S(ph)SDGS(ph)LSHEDLAK_	2	753.281	242
Q8VH51	RNA-binding protein 39	Rbm39	0.999986	1	S	0.00017987	DKS(1)PVREPIDNLTPEER	_DKS(ph)PVREPIDNLTPEER_	3	692.332	136
P39447	Tight junction protein ZO-1	Tjp1	0.826567	1	S	0.0285363	S(0.827)REDLS(0.173)AQPVQTK	_S(ph)REDLSAQPVQTK_	2	769.864	617
B9EJ86	Oxysterol-binding protein	Osbpl8	0.785171	3	S	0.000767781	GYS(0.008)S(0.026)PEPDIQDS(0.785)S(0.795)GS(0.796)EAQS(0.431)VKPS(0.08)T(0.078)R	_GYSSPEPDIQDS(ph)S(ph)GS(ph)EAQSVKPSTR_	3	950.37	807
B9EJ86	Oxysterol-binding protein	Osbpl8	0.794713	3	S	0.000767781	GYS(0.008)S(0.026)PEPDIQDS(0.785)S(0.795)GS(0.796)EAQS(0.431)VKPS(0.08)T(0.078)R	_GYSSPEPDIQDS(ph)S(ph)GS(ph)EAQSVKPSTR_	3	950.37	808
B9EJ86	Oxysterol-binding protein	Osbpl8	0.796331	3	S	0.000767781	GYS(0.008)S(0.026)PEPDIQDS(0.785)S(0.795)GS(0.796)EAQS(0.431)VKPS(0.08)T(0.078)R	_GYSSPEPDIQDS(ph)S(ph)GS(ph)EAQSVKPSTR_	3	950.37	810
F6ZFU0	Elongation factor 1-delta	Eef1d	1	1	S	2.87369e-62	GATPAEDDEDKDIDLFGS(1)DEEEEDKEAAR	_GATPAEDDEDKDIDLFGS(ph)DEEEEDKEAAR_	3	1092.78	433
Q64213	Splicing factor 1	Sf1	0.979188	2	S	1.88984e-05	TGDLGIPPNPEDRS(0.979)PS(0.931)PEPIY(0.019)NS(0.071)EGK	_TGDLGIPPNPEDRS(ph)PS(ph)PEPIYNSEGK_	3	976.09	80
Q64213	Splicing factor 1	Sf1	0.930546	2	S	1.88984e-05	TGDLGIPPNPEDRS(0.979)PS(0.931)PEPIY(0.019)NS(0.071)EGK	_TGDLGIPPNPEDRS(ph)PS(ph)PEPIYNSEGK_	3	976.09	82
Q61233	Plastin-2	Lcp1	0.996255	1	S	7.53778e-06	GS(0.996)VS(0.004)DEEMMELR	_GS(ph)VSDEEM(ox)M(ox)ELR_	2	747.778	5
Q8K400	Syntaxin-binding protein 5	Stxbp5	0.457085		S	0.0112517	S(0.245)S(0.298)S(0.457)VT(0.223)S(0.762)IDKES(0.015)R	_SSS(ph)VTS(ph)IDKESR_	2	728.292	783
Q8K400	Syntaxin-binding protein 5	Stxbp5	0.762171	2	S	0.0112517	S(0.245)S(0.298)S(0.457)VT(0.223)S(0.762)IDKES(0.015)R	_SSS(ph)VTS(ph)IDKESR_	2	728.292	786
Q9ET54	Palladin	Palld	1	3	S	1.48209e-17	S(1)RS(1)RDS(1)GDENEPIQER	_S(ph)RS(ph)RDS(ph)GDENEPIQER_	2	1057.88	1141
Q9ET54	Palladin	Palld	1	3	S	1.48209e-17	S(1)RS(1)RDS(1)GDENEPIQER	_S(ph)RS(ph)RDS(ph)GDENEPIQER_	2	1057.88	1143
Q9ET54	Palladin	Palld	1	3	S	1.48209e-17	S(1)RS(1)RDS(1)GDENEPIQER	_S(ph)RS(ph)RDS(ph)GDENEPIQER_	2	1057.88	1146
E9Q8Z8	Catenin delta-1	Ctnnd1	1	2;3	S	0.0129993	GS(1)LAS(1)LDS(1)LRK	_GS(ph)LAS(ph)LDS(ph)LRK_	2	693.777	346
E9Q8Z8	Catenin delta-1	Ctnnd1	1	2;3	S	0.0129993	GS(1)LAS(1)LDS(1)LRK	_GS(ph)LAS(ph)LDS(ph)LRK_	2	693.777	349
E9Q8Z8	Catenin delta-1	Ctnnd1	1	3	S	0.0129993	GS(1)LAS(1)LDS(1)LRK	_GS(ph)LAS(ph)LDS(ph)LRK_	2	693.777	352
Q9DCL8	Protein phosphatase inhibitor 2	Ppp1r2	0.999998	2	S	8.38189e-46	EQES(1)S(1)GEEDNDLSPEER	_EQES(ph)S(ph)GEEDNDLSPEER_	2	1055.36	122
Q9DCL8	Protein phosphatase inhibitor 2	Ppp1r2	0.999999	2	S	8.38189e-46	TREQES(1)S(1)GEEDNDLSPEER	_TREQES(ph)S(ph)GEEDNDLSPEER_	2	1183.94	123
D3Z4V2	Pre-mRNA 3'-end-processing factor FIP1	Fip1l1	0.99978	2	S	1.21518e-05	DHS(1)PT(0.825)PS(0.015)VFNS(0.16)DEER	_DHS(ph)PT(ph)PSVFNSDEER_	2	938.843	493
E9Q0N0	Intersectin-1	Itsn1	0.800259	1	S	0.0184652	LPEEPS(0.2)S(0.8)EDEQQPEK	_LPEEPSS(ph)EDEQQPEK_	2	911.375	335
E9Q0N0	Intersectin-1	Itsn1	0.491972		S	0.000443521	S(0.492)GS(0.492)GMS(0.016)VISSSSVDQR	_S(ph)GSGM(ox)SVISSSSVDQR_	2	840.351	313
E9Q0N0	Intersectin-1	Itsn1	0.491972		S	0.000443521	S(0.492)GS(0.492)GMS(0.016)VISSSSVDQR	_S(ph)GSGM(ox)SVISSSSVDQR_	2	840.351	315
P70452	Syntaxin-4	Stx4	1	1	S	2.50457e-11	QGDNIS(1)DDEDEVR	_QGDNIS(ph)DDEDEVR_	2	786.297	15
Q9CQ73		Pkp2	1	2;3	S	2.01295e-06	LEIS(1)PDS(1)S(1)PER	_LEIS(ph)PDS(ph)S(ph)PER_	2	735.254	151
Q9CQ73		Pkp2	1	2;3	S	2.01295e-06	LEIS(1)PDS(1)S(1)PER	_LEIS(ph)PDS(ph)S(ph)PER_	2	735.254	154
Q9CQ73		Pkp2	1	3	S	0.0226024	LEIS(1)PDS(1)S(1)PER	_LEIS(ph)PDS(ph)S(ph)PER_	2	735.254	155
O70435	Proteasome subunit alpha type-3	Psma3	0.999801	1	S	1.23831e-18	ESLKEEDES(1)DDDNM	_ESLKEEDES(ph)DDDNM(ox)_	2	876.295	250
P51859	Hepatoma-derived growth factor	Hdgf	1	1	S	9.77308e-11	AGDVLEDS(1)PKRPK	_AGDVLEDS(ph)PKRPK_	2	746.364	165
P51859	Hepatoma-derived growth factor	Hdgf	0.999994	2	S	1.09392e-118	GSAEGS(1)S(1)DEEGKLVIDEPAK	_GSAEGS(ph)S(ph)DEEGKLVIDEPAK_	2	1089.45	132
P51859	Hepatoma-derived growth factor	Hdgf	1	2	S	1.09392e-118	GSAEGS(1)S(1)DEEGKLVIDEPAKEK	_GSAEGS(ph)S(ph)DEEGKLVIDEPAKEK_	3	812.347	133
Q58A65	C-Jun-amino-terminal kinase-interacting protein 4	Spag9	0.970319	2	S	1.47973e-19	S(0.006)AS(0.97)QS(0.04)S(0.983)LDKLDQELK	_SAS(ph)QSS(ph)LDKLDQELK_	2	904.889	730
Q58A65	C-Jun-amino-terminal kinase-interacting protein 4	Spag9	0.982932	2	S	1.47973e-19	S(0.006)AS(0.97)QS(0.04)S(0.983)LDKLDQELK	_SAS(ph)QSS(ph)LDKLDQELK_	2	904.889	733
Q6NZJ6	Eukaryotic translation initiation factor 4 gamma 1	Eif4g1	0.918659	1	S	0.00533129	S(0.919)FS(0.081)KEVEER	_S(ph)FSKEVEER_	2	595.758	1187
E9PVP0	PCTP-like protein	Stard10	0.993691	1	S	1.06311e-07	AGGAGGEGS(0.994)DDDT(0.004)S(0.002)LT	_AGGAGGEGS(ph)DDDTSLT_	2	745.27	357
E9PYD5	Transcription elongation factor A protein 1	Tcea1	0.995949	1	S	0.00958461	KKEPAIS(0.001)S(0.004)QNS(0.996)PEAR	_KKEPAISSQNS(ph)PEAR_	3	574.612	111
E9Q9C3	Afadin	Mllt4	1	1	S	0.0364172	S(1)QEELREEK	_S(ph)QEELREEK_	2	614.266	1282
E9Q3T0	60S acidic ribosomal protein P1	Gm10073	0.999977	1	S	5.10689e-31	KEES(1)EESEDDMGFGLFD	_KEES(ph)EESEDDM(ox)GFGLFD_	2	1030.37	101
Q8K4L3	Supervillin	Svil	0.967896	2	S	0.00607148	S(0.032)IS(0.968)FPEVPRS(1)PK	_SIS(ph)FPEVPRS(ph)PK_	2	752.336	220
Q8K4L3	Supervillin	Svil	0.999996	2	S	0.00607148	S(0.032)IS(0.968)FPEVPRS(1)PK	_SIS(ph)FPEVPRS(ph)PK_	2	752.336	227
E9Q411		Nbas	0.999999	2	S	4.85622e-80	AGEEDEGEVDS(1)DS(0.999)DPET(0.001)SAK	_AGEEDEGEVDS(ph)DS(ph)DPETSAK_	2	1113.88	472
E9Q411		Nbas	0.999271	2	S	4.85622e-80	AGEEDEGEVDS(1)DS(0.999)DPET(0.001)SAK	_AGEEDEGEVDS(ph)DS(ph)DPETSAK_	2	1113.88	474
F8VQC1		Srp72	0.508035	2	S	4.72216e-10	AVS(0.481)S(0.508)PPT(0.452)S(0.452)PRPGS(0.081)AAT(0.019)IS(0.005)S(0.001)SASNIVPPR	_AVSS(ph)PPT(ph)SPRPGSAATISSSASNIVPPR_	3	951.118	621
F8VQC1		Srp72	0.452369		S	4.72216e-10	AVS(0.481)S(0.508)PPT(0.452)S(0.452)PRPGS(0.081)AAT(0.019)IS(0.005)S(0.001)SASNIVPPR	_AVSS(ph)PPT(ph)SPRPGSAATISSSASNIVPPR_	3	951.118	625
E9Q942	UPF0766 protein C6orf228 homolog		0.85437	2	S	4.88648e-12	ELVGDT(0.004)GS(0.016)QEGDNEQPS(0.854)GS(0.854)ET(0.271)EEDPSASPQK	_ELVGDTGSQEGDNEQPS(ph)GS(ph)ETEEDPSASPQK_	3	1122.1	59
E9Q942	UPF0766 protein C6orf228 homolog		0.854373	2	S	4.88648e-12	ELVGDT(0.004)GS(0.016)QEGDNEQPS(0.854)GS(0.854)ET(0.271)EEDPSASPQK	_ELVGDTGSQEGDNEQPS(ph)GS(ph)ETEEDPSASPQK_	3	1122.1	61
E9QKD1	Nucleolar protein 8	Nol8	0.963708	2	S	3.1446e-14	S(0.016)S(0.02)MS(0.964)DDDVDS(1)EDELK	_SSM(ox)S(ph)DDDVDS(ph)EDELK_	2	924.294	318
E9QKD1	Nucleolar protein 8	Nol8	1	2	S	3.1446e-14	S(0.016)S(0.02)MS(0.964)DDDVDS(1)EDELK	_SSM(ox)S(ph)DDDVDS(ph)EDELK_	2	924.294	324
E9QKI4	Proline-rich AKT1 substrate 1	Akt1s1	0.557697	2	S	5.95983e-24	S(0.442)S(0.558)DEENGPPS(0.294)S(0.706)PDLDR	_SS(ph)DEENGPPSS(ph)PDLDR_	2	931.33	275
E9QKI4	Proline-rich AKT1 substrate 1	Akt1s1	0.706151	2	S	5.95983e-24	S(0.442)S(0.558)DEENGPPS(0.294)S(0.706)PDLDR	_SS(ph)DEENGPPSS(ph)PDLDR_	2	931.33	284
E9QMN5	Transcriptional repressor p66 alpha	Gatad2a	0.999992	3	S	0.000151597	RPPS(1)PDVIVLS(0.758)DS(0.244)EQPS(0.575)S(0.423)PR	_RPPS(ph)PDVIVLS(ph)DSEQPS(ph)SPR_	3	801.673	96
E9QMN5	Transcriptional repressor p66 alpha	Gatad2a	0.758205	3	S	0.000151597	RPPS(1)PDVIVLS(0.758)DS(0.244)EQPS(0.575)S(0.423)PR	_RPPS(ph)PDVIVLS(ph)DSEQPS(ph)SPR_	3	801.673	103
E9QMN5	Transcriptional repressor p66 alpha	Gatad2a	0.575277	3	S	0.000151597	RPPS(1)PDVIVLS(0.758)DS(0.244)EQPS(0.575)S(0.423)PR	_RPPS(ph)PDVIVLS(ph)DSEQPS(ph)SPR_	3	801.673	109
E9QNH7	Acyl-CoA-binding domain-containing protein 5	Acbd5	1	4	S	1.23999e-15	AES(1)S(1)DS(1)GAES(1)EEEEAQEELKGAEQSGSDDKK	_AES(ph)S(ph)DS(ph)GAES(ph)EEEEAQEELKGAEQSGSDDKK_	3	1192.75	184
E9QNH7	Acyl-CoA-binding domain-containing protein 5	Acbd5	1	4	S	1.23999e-15	AES(1)S(1)DS(1)GAES(1)EEEEAQEELKGAEQSGSDDKK	_AES(ph)S(ph)DS(ph)GAES(ph)EEEEAQEELKGAEQSGSDDKK_	3	1192.75	185
E9QNH7	Acyl-CoA-binding domain-containing protein 5	Acbd5	1	2;4	S	3.91677e-81	AES(1)S(1)DS(1)GAES(1)EEEEAQEELKGAEQSGSDDKK	_AES(ph)S(ph)DS(ph)GAES(ph)EEEEAQEELKGAEQSGSDDKK_	3	1192.75	187
E9QNH7	Acyl-CoA-binding domain-containing protein 5	Acbd5	1	2;4	S	3.91677e-81	AESS(0.005)DS(0.995)GAES(1)EEEEAQEELK	_AESSDS(ph)GAES(ph)EEEEAQEELK_	2	1157.41	191
E9QP00	Transformer-2 protein homolog alpha	Tra2a	1	2	S	5.99797e-16	RS(1)PS(1)PYYSR	_RS(ph)PS(ph)PYYSR_	2	636.744	260
E9QP00	Transformer-2 protein homolog alpha	Tra2a	0.999988	2	S	5.99797e-16	RS(1)PS(1)PYYSR	_RS(ph)PS(ph)PYYSR_	2	636.744	262
E9QP00	Transformer-2 protein homolog alpha	Tra2a	1	2	S	2.80306e-19	S(1)DVEENNFEGRES(1)R	_(ac)S(ph)DVEENNFEGRES(ph)R_	2	935.338	2
E9QP00	Transformer-2 protein homolog alpha	Tra2a	1	2	S	2.80306e-19	S(1)DVEENNFEGRES(1)R	_(ac)S(ph)DVEENNFEGRES(ph)R_	2	935.338	14
E9QP00	Transformer-2 protein homolog alpha	Tra2a	0.995962	4	S	0.00221625	S(0.996)RS(0.91)RS(0.546)Y(0.716)T(0.832)PEYR	_S(ph)RS(ph)RSY(ph)T(ph)PEYR_	2	861.28	80
E9QP00	Transformer-2 protein homolog alpha	Tra2a	0.999996	3;4	S	0.000830063	S(1)RS(1)Y(0.002)T(0.998)PEYR	_S(ph)RS(ph)YT(ph)PEYR_	2	699.73	82
E9QP00	Transformer-2 protein homolog alpha	Tra2a	0.999943	3;4	S	0.000830063	S(1)RS(1)Y(0.002)T(0.998)PEYR	_S(ph)RS(ph)YT(ph)PEYR_	2	699.73	84
F2Z3U3		Raph1	1	2	S	1.29109e-05	MEQLS(1)DEEIDHGAEEDS(1)DKEDQDLDK	_(ac)M(ox)EQLS(ph)DEEIDHGAEEDS(ph)DKEDQDLDK_	3	1080.07	5
F2Z3U3		Raph1	1	2	S	1.29109e-05	MEQLS(1)DEEIDHGAEEDS(1)DKEDQDLDK	_(ac)M(ox)EQLS(ph)DEEIDHGAEEDS(ph)DKEDQDLDK_	3	1080.07	17
Q3UDE2	Tubulin--tyrosine ligase-like protein 12	Ttll12	0.992844	1	S	0.00504249	MEIQS(0.007)GPQPGS(0.993)PGR	_(ac)M(ox)EIQSGPQPGS(ph)PGR_	2	789.835	11
Q80U72	Protein scribble homolog	Scrib	0.999877	1	S	0.0264304	NS(1)LESISSIDR	_NS(ph)LESISSIDR_	2	650.793	1206
Q9JIX8	Apoptotic chromatin condensation inducer in the nucleus	Acin1	0.999237	2	S	0.023264	KS(0.999)LS(0.995)PGVS(0.006)R	_KS(ph)LS(ph)PGVSR_	2	545.738	655
Q9JIX8	Apoptotic chromatin condensation inducer in the nucleus	Acin1	0.99502	2	S	0.023264	KS(0.999)LS(0.995)PGVS(0.006)R	_KS(ph)LS(ph)PGVSR_	2	545.738	657
Q9JIX8	Apoptotic chromatin condensation inducer in the nucleus	Acin1	0.945445	2	S	0.000153897	S(0.055)QS(0.945)PS(1)PPPLPEDLEK	_SQS(ph)PS(ph)PPPLPEDLEK_	2	890.876	389
Q9JIX8	Apoptotic chromatin condensation inducer in the nucleus	Acin1	0.999563	2	S	0.000153897	S(0.055)QS(0.945)PS(1)PPPLPEDLEK	_SQS(ph)PS(ph)PPPLPEDLEK_	2	890.876	391
Q8K1Z0	Ubiquinone biosynthesis protein COQ9, mitochondrial	Coq9	0.994555	1	S	1.84426e-06	Y(0.002)T(0.003)DQS(0.995)GEEEEDYESEEQLQHR	_YTDQS(ph)GEEEEDYESEEQLQHR_	3	894.343	81
Q3UM45	Protein phosphatase 1 regulatory subunit 7	Ppp1r7	1	2	S	7.59199e-43	HGGGGIVANLS(1)EQS(1)LKDGVDR	_HGGGGIVANLS(ph)EQS(ph)LKDGVDR_	2	1135	45
Q3UM45	Protein phosphatase 1 regulatory subunit 7	Ppp1r7	1	2	S	7.59199e-43	HGGGGIVANLS(1)EQS(1)LKDGVDR	_HGGGGIVANLS(ph)EQS(ph)LKDGVDR_	2	1135	48
Q3UM45	Protein phosphatase 1 regulatory subunit 7	Ppp1r7	1	2	S	1.6706e-13	RVES(1)EES(1)GDEEGKK	_RVES(ph)EES(ph)GDEEGKK_	3	580.224	24
Q3UM45	Protein phosphatase 1 regulatory subunit 7	Ppp1r7	1	2	S	1.6706e-13	RVES(1)EES(1)GDEEGKK	_RVES(ph)EES(ph)GDEEGKK_	3	580.224	27
G3X9F6		Sh3tc1	1	2	S	0.00286871	RAS(1)S(1)LDLEEPR	_RAS(ph)S(ph)LDLEEPR_	2	716.797	481
G3X9F6		Sh3tc1	1	2	S	0.00286871	RAS(1)S(1)LDLEEPR	_RAS(ph)S(ph)LDLEEPR_	2	716.797	482
Q61712	DnaJ homolog subfamily C member 1	Dnajc1	0.999919	2	S	2.09041e-12	DFDISEQNDS(1)S(1)DEEKQR	_DFDISEQNDS(ph)S(ph)DEEKQR_	2	1101.4	477
Q61712	DnaJ homolog subfamily C member 1	Dnajc1	0.9999	2	S	2.09041e-12	DFDISEQNDS(1)S(1)DEEKQR	_DFDISEQNDS(ph)S(ph)DEEKQR_	2	1101.4	478
Q02248	Catenin beta-1	Ctnnb1	0.445928		S	0.0103445	T(0.446)S(0.446)MGGT(0.108)QQQFVEGVR	_T(ph)SM(ox)GGTQQQFVEGVR_	2	860.872	552
H9KV00	Protein SON	Son	0.999997	3	S	0.0131429	S(1)FS(1)IS(0.899)PS(0.101)RR	_S(ph)FS(ph)IS(ph)PSRR_	2	638.73	1973
H9KV00	Protein SON	Son	0.999991	3	S	0.0131429	S(1)FS(1)IS(0.899)PS(0.101)RR	_S(ph)FS(ph)IS(ph)PSRR_	2	638.73	1975
H9KV00	Protein SON	Son	0.899481	3	S	0.0131429	S(1)FS(1)IS(0.899)PS(0.101)RR	_S(ph)FS(ph)IS(ph)PSRR_	2	638.73	1977
F8VQK5	SAM and SH3 domain-containing protein 1	Sash1	0.975089	1	S	0.0164716	S(0.025)HS(0.975)LDDLQGDADVGK	_SHS(ph)LDDLQGDADVGK_	2	818.846	831
O35887	Calumenin	Calu	0.994906	1	S	0.0213262	SFDQLT(0.005)PEES(0.995)KER	_SFDQLTPEES(ph)KER_	2	823.359	69
P19426	Negative elongation factor E	Rdbp	0.981579	1	S	0.000149459	S(0.018)MS(0.982)ADEDLQEPSR	_SM(ox)S(ph)ADEDLQEPSR_	2	780.798	115
Q6P542	ATP-binding cassette sub-family F member 1	Abcf1	0.86417	1	S	0.0387326	QLS(0.136)VPAS(0.864)DEEDEVPAPIPR	_QLSVPAS(ph)DEEDEVPAPIPR_	2	1064.99	107
G3X9P5		4933421E11Rik	0.99955	2	S	0.0194305	AKPT(0.001)QY(0.999)EMAS(1)IVK	_AKPTQY(ph)EMAS(ph)IVK_	2	813.356	23
G5E8I8	Calcium homeostasis endoplasmic reticulum protein	Cherp	0.979601	3;4	S	0.000395241	S(0.977)RS(0.98)RS(0.981)PT(0.817)PPS(0.229)AAGLGS(0.01)NS(0.006)APPIPDS(0.001)R	_S(ph)RS(ph)RS(ph)PT(ph)PPSAAGLGSNSAPPIPDSR_	3	961.394	826
G5E8I8	Calcium homeostasis endoplasmic reticulum protein	Cherp	0.980805	3;4	S	0.000395241	S(0.977)RS(0.98)RS(0.981)PT(0.817)PPS(0.229)AAGLGS(0.01)NS(0.006)APPIPDS(0.001)R	_S(ph)RS(ph)RS(ph)PT(ph)PPSAAGLGSNSAPPIPDSR_	3	961.394	828
G5E8I8	Calcium homeostasis endoplasmic reticulum protein	Cherp	0.976607	4	S	0.000395241	S(0.977)RS(0.98)RS(0.981)PT(0.817)PPS(0.229)AAGLGS(0.01)NS(0.006)APPIPDS(0.001)R	_S(ph)RS(ph)RS(ph)PT(ph)PPSAAGLGSNSAPPIPDSR_	3	961.394	824
Q62093	Serine/arginine-rich splicing factor 2	Srsf2	1	3	S	5.91313e-48	S(1)KS(1)PPKS(1)PEEEGAVSS	_S(ph)KS(ph)PPKS(ph)PEEEGAVSS_	2	928.344	206
Q62093	Serine/arginine-rich splicing factor 2	Srsf2	1	3	S	5.91313e-48	S(1)KS(1)PPKS(1)PEEEGAVSS	_S(ph)KS(ph)PPKS(ph)PEEEGAVSS_	2	928.344	208
Q62093	Serine/arginine-rich splicing factor 2	Srsf2	1	3	S	5.91313e-48	S(1)KS(1)PPKS(1)PEEEGAVSS	_S(ph)KS(ph)PPKS(ph)PEEEGAVSS_	2	928.344	212
Q62093	Serine/arginine-rich splicing factor 2	Srsf2	0.761783	3	S	0.00012111	S(0.622)KS(0.379)PPKS(1)PEEEGAVS(0.762)S(0.238)	_S(ph)KSPPKS(ph)PEEEGAVS(ph)S_	2	928.344	220
H7BX95	Serine/arginine-rich splicing factor 1	Srsf1	0.999917	2	S	0.00362572	VDGPRS(1)PS(0.998)Y(0.002)GR	_VDGPRS(ph)PS(ph)YGR_	2	675.766	199
H7BX95	Serine/arginine-rich splicing factor 1	Srsf1	0.998133	2	S	0.00362572	VDGPRS(1)PS(0.998)Y(0.002)GR	_VDGPRS(ph)PS(ph)YGR_	2	675.766	201
Q8BI84	Melanoma inhibitory activity protein 3	Mia3	0.962692	1	S	0.0029658	EEAKPAS(0.963)PS(0.027)S(0.01)VQDR	_EEAKPAS(ph)PSSVQDR_	2	790.851	1915
O35551	Rab GTPase-binding effector protein 1	Rabep1	0.947718	2	S	0.000493054	AQS(0.948)T(0.231)DS(0.778)LGT(0.027)S(0.01)S(0.004)S(0.002)LQSK	_AQS(ph)TDS(ph)LGTSSSLQSK_	2	878.856	407
O35551	Rab GTPase-binding effector protein 1	Rabep1	0.77819	2	S	0.000493054	AQS(0.948)T(0.231)DS(0.778)LGT(0.027)S(0.01)S(0.004)S(0.002)LQSK	_AQS(ph)TDS(ph)LGTSSSLQSK_	2	878.856	410
Q8C2Q7	Heterogeneous nuclear ribonucleoprotein H	Hnrnph1	0.999584	1	S	1.09106e-08	HTGPNS(1)PDTANDGFVR	_HTGPNS(ph)PDTANDGFVR_	2	882.87	104
O35071	Kinesin-like protein KIF1C	Kif1c	0.999834	2	S	1.5324e-13	LYADS(1)DS(0.99)GEDS(0.01)DKR	_LYADS(ph)DS(ph)GEDSDKR_	2	859.303	674
O35071	Kinesin-like protein KIF1C	Kif1c	0.990208	2	S	1.5324e-13	LYADS(1)DS(0.99)GEDS(0.01)DKR	_LYADS(ph)DS(ph)GEDSDKR_	2	859.303	676
O35218	Cleavage and polyadenylation specificity factor subunit 2	Cpsf2	1	3	S	2.09261e-11	EADIDS(1)S(1)DES(1)DVEEDVDQPSAHK	_EADIDS(ph)S(ph)DES(ph)DVEEDVDQPSAHK_	3	919.651	419
O35218	Cleavage and polyadenylation specificity factor subunit 2	Cpsf2	1	3	S	2.09261e-11	EADIDS(1)S(1)DES(1)DVEEDVDQPSAHK	_EADIDS(ph)S(ph)DES(ph)DVEEDVDQPSAHK_	3	919.651	420
O35218	Cleavage and polyadenylation specificity factor subunit 2	Cpsf2	0.999999	3	S	2.09261e-11	EADIDS(1)S(1)DES(1)DVEEDVDQPSAHK	_EADIDS(ph)S(ph)DES(ph)DVEEDVDQPSAHK_	3	919.651	423
O35295	Transcriptional activator protein Pur-beta	Purb	1	2	S	7.48601e-27	ADGDS(1)GS(1)ERGGGGGGGGGPGGFQPAPR	_(ac)ADGDS(ph)GS(ph)ERGGGGGGGGGPGGFQPAPR_	2	1258.48	6
O35295	Transcriptional activator protein Pur-beta	Purb	1	2	S	7.48601e-27	ADGDS(1)GS(1)ERGGGGGGGGGPGGFQPAPR	_(ac)ADGDS(ph)GS(ph)ERGGGGGGGGGPGGFQPAPR_	2	1258.48	8
O35344	Importin subunit alpha-3	Kpna3	0.997804	1	S	5.31933e-06	NVPQEES(0.002)LEDS(0.998)DVDADFK	_NVPQEESLEDS(ph)DVDADFK_	2	1058.93	60
O54774	AP-3 complex subunit delta-1	Ap3d1	0.896802	2;3	S	6.9881e-18	HS(0.103)S(0.897)LPT(0.013)ES(0.987)DEDIAPAQR	_HSS(ph)LPTES(ph)DEDIAPAQR_	2	1006.9	755
O54774	AP-3 complex subunit delta-1	Ap3d1	0.999989	1;2;3	S	2.72996e-31	HSS(0.001)LPT(0.998)ES(1)DEDIAPAQR	_HSSLPT(ph)ES(ph)DEDIAPAQR_	2	1006.9	760
O55003	BCL2/adenovirus E1B 19 kDa protein-interacting protein 3	Bnip3	0.993633	1;3	S	0.0071598	AEIDS(0.006)HS(0.994)FGEK	_AEIDSHS(ph)FGEK_	2	650.266	79
O55003	BCL2/adenovirus E1B 19 kDa protein-interacting protein 3	Bnip3	0.701438	2;3	S	0.0071598	AEIDS(0.271)HS(0.721)FGEKNS(0.701)T(0.38)LS(0.912)EEDY(0.014)IER	_AEIDSHS(ph)FGEKNS(ph)TLS(ph)EEDYIER_	3	966.038	85
O55003	BCL2/adenovirus E1B 19 kDa protein-interacting protein 3	Bnip3	0.999208	1;2;3	S	1.34992e-06	NST(0.001)LS(0.999)EEDYIER	_NSTLS(ph)EEDYIER_	2	768.317	88
O55022	Membrane-associated progesterone receptor component 1	Pgrmc1	0.999954	1	S	4.03406e-181	EGEEPTVYS(1)DDEEPK	_EGEEPTVYS(ph)DDEEPK_	2	902.346	181
P07901	Heat shock protein HSP 90-alpha	Hsp90aa1	1	1	S	9.90266e-92	ESDDKPEIEDVGS(1)DEEEEEKK	_ESDDKPEIEDVGS(ph)DEEEEEKK_	3	839.341	263
P09405	Nucleolin	Ncl	1	2	S	3.56824e-55	KEDS(1)DEDEDEEDEDDS(1)DEDEDDEEEDEFEPPIVK	_KEDS(ph)DEDEDEEDEDDS(ph)DEDEDDEEEDEFEPPIVK_	3	1407.47	145
P09405	Nucleolin	Ncl	1	2	S	3.56824e-55	KEDS(1)DEDEDEEDEDDS(1)DEDEDDEEEDEFEPPIVK	_KEDS(ph)DEDEDEEDEDDS(ph)DEDEDDEEEDEFEPPIVK_	3	1407.47	157
P11499	Heat shock protein HSP 90-beta	Hsp90ab1	1	1;2	S	1.73188e-217	IEDVGS(1)DEEDDSGKDKK	_IEDVGS(ph)DEEDDSGKDKK_	2	973.399	255
P14246	Solute carrier family 2, facilitated glucose transporter member 2	Slc2a2	0.919298	1	S	0.00870864	AAVQMEFLAS(0.007)S(0.073)ES(0.919)V	_AAVQM(ox)EFLASSES(ph)V_	2	782.834	522
P19785	Estrogen receptor	Esr1	0.972032	3	S	0.007469	S(0.012)IILLNS(0.972)GVY(0.271)T(0.288)FLS(0.486)S(0.486)T(0.485)LK	_SIILLNS(ph)GVYTFLS(ph)S(ph)TLK_	2	1098.51	460
P19785	Estrogen receptor	Esr1	0.56305	3	S	0.007469	S(0.011)IILLNS(0.969)GVY(0.161)T(0.169)FLS(0.563)S(0.563)T(0.563)LK	_SIILLNS(ph)GVYTFLS(ph)S(ph)TLK_	2	1098.51	467
P19785	Estrogen receptor	Esr1	0.56315	3	S	0.007469	S(0.011)IILLNS(0.969)GVY(0.161)T(0.169)FLS(0.563)S(0.563)T(0.563)LK	_SIILLNS(ph)GVYTFLS(ph)S(ph)TLK_	2	1098.51	468
P26231	Catenin alpha-1	Ctnna1	0.994643	2;3	S	1.34006e-21	S(0.995)RT(0.667)S(0.338)VQT(1)EDDQLIAGQSAR	_S(ph)RT(ph)SVQT(ph)EDDQLIAGQSAR_	2	1151.46	652
P26231	Catenin alpha-1	Ctnna1	0.81937	2;3	S	1.34006e-21	S(0.938)RT(0.242)S(0.819)VQTEDDQLIAGQSAR	_S(ph)RTS(ph)VQTEDDQLIAGQSAR_	2	1111.48	655
P26231	Catenin alpha-1	Ctnna1	1	1	S	8.66844e-204	TPEELDDS(1)DFETEDFDVR	_TPEELDDS(ph)DFETEDFDVR_	2	1119.93	641
P26350	Prothymosin alpha	Ptma	0.999127	1	S	0.00761885	S(0.999)DAAVDTSSEITTK	_(ac)S(ph)DAAVDTSSEITTK_	2	773.83	2
P26645	Myristoylated alanine-rich C-kinase substrate	Marcks	0.298109		S	0.0029271	AEDGAAPS(0.106)PS(0.298)S(0.298)ET(0.298)PK	_AEDGAAPSPS(ph)SETPK_	2	762.317	140
P26645	Myristoylated alanine-rich C-kinase substrate	Marcks	0.298109		S	0.0029271	AEDGAAPS(0.106)PS(0.298)S(0.298)ET(0.298)PK	_AEDGAAPSPS(ph)SETPK_	2	762.317	141
P29699	Alpha-2-HS-glycoprotein	Ahsg	0.988467	2;3	S	1.06422e-06	HAFS(0.011)PVAS(0.988)VES(0.998)AS(0.935)GET(0.062)LHS(0.005)PK	_HAFSPVAS(ph)VES(ph)AS(ph)GETLHSPK_	3	793.322	309
P29699	Alpha-2-HS-glycoprotein	Ahsg	0.997782	3	S	1.06422e-06	HAFS(0.011)PVAS(0.988)VES(0.998)AS(0.935)GET(0.062)LHS(0.005)PK	_HAFSPVAS(ph)VES(ph)AS(ph)GETLHSPK_	3	793.322	312
P29699	Alpha-2-HS-glycoprotein	Ahsg	0.935385	3	S	1.06422e-06	HAFS(0.011)PVAS(0.988)VES(0.998)AS(0.935)GET(0.062)LHS(0.005)PK	_HAFSPVAS(ph)VES(ph)AS(ph)GETLHSPK_	3	793.322	314
P29699	Alpha-2-HS-glycoprotein	Ahsg	0.350723		S	0.0032756	HAFSPVAS(0.005)VES(0.486)AS(0.486)GET(0.672)LHS(0.351)PK	_HAFSPVASVESASGET(ph)LHS(ph)PK_	3	766.666	320
P35564	Calnexin	Canx	1	1	S	2.36366e-31	AEEDEILNRS(1)PR	_AEEDEILNRS(ph)PR_	2	754.841	582
P35564	Calnexin	Canx	1	2	S	1.42517e-23	QKS(1)DAEEDGVT(0.5)GS(0.5)QDEEDS(0.001)KPK	_QKS(ph)DAEEDGVT(ph)GSQDEEDSKPK_	2	1269.99	553
P35564	Calnexin	Canx	0.945744	1;2	S	1.42517e-23	QKS(0.999)DAEEDGVT(0.052)GS(0.946)QDEEDS(0.003)KPK	_QKS(ph)DAEEDGVTGS(ph)QDEEDSKPK_	3	846.997	563
P35601	Replication factor C subunit 1	Rfc1	0.529573	2	S	0.00256331	IIY(0.519)DS(0.53)DS(0.687)ES(0.236)EET(0.029)VQVK	_IIYDS(ph)DS(ph)ESEETVQVK_	2	1001.4	68
P35601	Replication factor C subunit 1	Rfc1	0.686992	2	S	0.00256331	IIY(0.519)DS(0.53)DS(0.687)ES(0.236)EET(0.029)VQVK	_IIYDS(ph)DS(ph)ESEETVQVK_	2	1001.4	70
P43274	Histone H1.4	Hist1h1e	0.875263	1	S	3.71397e-09	S(0.875)ET(0.125)APAAPAAPAPAEK	_(ac)S(ph)ETAPAAPAAPAPAEK_	2	800.866	2
P43277	Histone H1.3	Hist1h1d	0.863182	1	S	1.14402e-05	S(0.863)ET(0.137)APAAPAAPAPVEK	_(ac)S(ph)ETAPAAPAAPAPVEK_	2	814.882	2
P47713	Cytosolic phospholipase A2	Pla2g4a	0.565089	2	S	0.0145247	HIVS(0.245)NDS(0.533)S(0.565)DS(0.657)DDEAQGPK	_HIVSNDSS(ph)DS(ph)DDEAQGPK_	2	1030.88	435
P47713	Cytosolic phospholipase A2	Pla2g4a	0.656584	2	S	0.0145247	HIVS(0.245)NDS(0.533)S(0.565)DS(0.657)DDEAQGPK	_HIVSNDSS(ph)DS(ph)DDEAQGPK_	2	1030.88	437
P53986	Monocarboxylate transporter 1	Slc16a1	1	2	S	0.0104585	LKS(1)KES(1)LQEAGK	_LKS(ph)KES(ph)LQEAGK_	2	739.339	210
P53986	Monocarboxylate transporter 1	Slc16a1	1	1;2	S	0.00503362	LKS(1)KES(1)LQEAGK	_LKS(ph)KES(ph)LQEAGK_	2	739.339	213
P58871	182 kDa tankyrase-1-binding protein	Tnks1bp1	1	2	S	3.99289e-72	VPS(1)S(1)DEEVVEEPQSR	_VPS(ph)S(ph)DEEVVEEPQSR_	2	923.861	1611
P58871	182 kDa tankyrase-1-binding protein	Tnks1bp1	1	2	S	3.99289e-72	VPS(1)S(1)DEEVVEEPQSR	_VPS(ph)S(ph)DEEVVEEPQSR_	2	923.861	1612
P61264	Syntaxin-1B	Stx1b	0.871565	1	S	0.00268914	S(0.128)AKDS(0.872)DDEEEVVHVDRDHFMDEFFEQVEEIR	_SAKDS(ph)DDEEEVVHVDRDHFM(ox)DEFFEQVEEIR_	4	970.16	14
P62754	40S ribosomal protein S6	Rps6	0.981965	2	S	0.009226	LS(0.018)S(0.982)LRAS(0.898)T(0.081)S(0.021)K	_LSS(ph)LRAS(ph)TSK_	2	605.267	236
P62754	40S ribosomal protein S6	Rps6	0.897835	2	S	0.009226	LS(0.018)S(0.982)LRAS(0.898)T(0.081)S(0.021)K	_LSS(ph)LRAS(ph)TSK_	2	605.267	240
P62996	Transformer-2 protein homolog beta	Tra2b	0.999906	2;3	S	1.40835e-07	RHS(1)HS(0.972)HS(0.895)PMS(0.114)T(0.018)R	_RHS(ph)HS(ph)HS(ph)PM(ox)STR_	2	838.284	95
P62996	Transformer-2 protein homolog beta	Tra2b	0.972191	2;3	S	1.40835e-07	RHS(1)HS(0.972)HS(0.895)PMS(0.114)T(0.018)R	_RHS(ph)HS(ph)HS(ph)PM(ox)STR_	2	838.284	97
P62996	Transformer-2 protein homolog beta	Tra2b	0.948788	2;3	S	1.40835e-07	HS(0.047)HS(0.955)HS(0.949)PMS(0.027)T(0.022)R	_HSHS(ph)HS(ph)PM(ox)STR_	2	720.25	99
P70441	Na(+)/H(+) exchange regulatory cofactor NHE-RF1	Slc9a3r1	0.565705	3	S	0.00101556	S(0.566)AS(0.566)S(0.549)DT(0.434)S(0.882)EELNS(0.002)QDSPK	_S(ph)AS(ph)SDTS(ph)EELNSQDSPK_	2	1011.34	283
P70441	Na(+)/H(+) exchange regulatory cofactor NHE-RF1	Slc9a3r1	0.993004	1;2;3	S	1.15832e-204	SAS(0.993)S(0.007)DTSEELNSQDS(1)PKR	_SAS(ph)SDTSEELNSQDS(ph)PKR_	2	1049.4	285
P70441	Na(+)/H(+) exchange regulatory cofactor NHE-RF1	Slc9a3r1	0.548511	3	S	0.00101556	S(0.566)AS(0.566)S(0.549)DT(0.434)S(0.882)EELNS(0.002)QDSPK	_S(ph)AS(ph)SDTS(ph)EELNSQDSPK_	2	1011.34	286
P70441	Na(+)/H(+) exchange regulatory cofactor NHE-RF1	Slc9a3r1	0.882361	3	S	0.00351466	S(0.566)AS(0.566)S(0.549)DT(0.434)S(0.882)EELNS(0.002)QDSPK	_S(ph)AS(ph)SDTS(ph)EELNSQDSPK_	2	1011.34	289
P70441	Na(+)/H(+) exchange regulatory cofactor NHE-RF1	Slc9a3r1	0.99999	2	S	1.15832e-204	SAS(0.993)S(0.007)DTSEELNSQDS(1)PKR	_SAS(ph)SDTSEELNSQDS(ph)PKR_	2	1049.4	297
P70670	Nascent polypeptide-associated complex subunit alpha, muscle-specific form	Naca	0.823069	1	S	7.89375e-26	VQGEAVSNIQENTQT(0.01)PT(0.166)VQEES(0.823)EEEEVDETGVEVK	_VQGEAVSNIQENTQTPTVQEES(ph)EEEEVDETGVEVK_	3	1314.25	2138
P97855	Ras GTPase-activating protein-binding protein 1	G3bp1	0.608598	1	S	3.76813e-12	S(0.196)T(0.196)S(0.609)PAPADVAPAQEDLR	_STS(ph)PAPADVAPAQEDLR_	2	902.909	231
P99027	60S acidic ribosomal protein P2	Rplp2	1	1;2	S	3.03012e-96	KEES(1)EES(1)DDDMGFGLFD	_KEES(ph)EES(ph)DDDMGFGLFD_	2	1055.35	102
P99027	60S acidic ribosomal protein P2	Rplp2	1	2	S	3.03012e-96	KEES(1)EES(1)DDDMGFGLFD	_KEES(ph)EES(ph)DDDMGFGLFD_	2	1055.35	105
Q05CL8	La-related protein 7	Larp7	0.823266	2	S	4.81168e-10	T(0.18)AS(0.823)EGS(0.997)EAETPEAPKQPAK	_TAS(ph)EGS(ph)EAETPEAPKQPAK_	2	1044.43	253
Q05CL8	La-related protein 7	Larp7	0.997098	2	S	4.81168e-10	T(0.18)AS(0.823)EGS(0.997)EAETPEAPKQPAK	_TAS(ph)EGS(ph)EAETPEAPKQPAK_	2	1044.43	256
Q05D44	Eukaryotic translation initiation factor 5B	Eif5b	0.992166	3;4	S	7.10483e-15	S(0.01)RVNS(0.992)S(0.998)GES(1)GGES(1)DEFLQSR	_SRVNS(ph)S(ph)GES(ph)GGES(ph)DEFLQSR_	2	1224.41	183
Q05D44	Eukaryotic translation initiation factor 5B	Eif5b	0.998234	3;4	S	7.10483e-15	S(0.01)RVNS(0.992)S(0.998)GES(1)GGES(1)DEFLQSR	_SRVNS(ph)S(ph)GES(ph)GGES(ph)DEFLQSR_	2	1224.41	184
Q05D44	Eukaryotic translation initiation factor 5B	Eif5b	0.999998	3;4	S	7.10483e-15	S(0.01)RVNS(0.992)S(0.998)GES(1)GGES(1)DEFLQSR	_SRVNS(ph)S(ph)GES(ph)GGES(ph)DEFLQSR_	2	1224.41	187
Q05D44	Eukaryotic translation initiation factor 5B	Eif5b	0.999913	4	S	7.10483e-15	S(0.01)RVNS(0.992)S(0.998)GES(1)GGES(1)DEFLQSR	_SRVNS(ph)S(ph)GES(ph)GGES(ph)DEFLQSR_	2	1224.41	191
Q05D44	Eukaryotic translation initiation factor 5B	Eif5b	0.999967	1	S	5.39581e-24	SVPTVDS(1)GNEDDDSSFK	_SVPTVDS(ph)GNEDDDSSFK_	2	939.867	215
Q05D44	Eukaryotic translation initiation factor 5B	Eif5b	0.999998	1	S	5.76584e-12	TSFDENDS(1)EELEDKDSK	_TSFDENDS(ph)EELEDKDSK_	2	1034.4	114
Q0VGT4	Uncharacterized protein C4orf21 homolog		0.333333		S	0.0168377	LPLLS(0.333)S(0.333)T(0.333)DDEPK	_LPLLS(ph)STDDEPK_	2	697.826	576
Q0VGT4	Uncharacterized protein C4orf21 homolog		0.333333		S	0.0168377	LPLLS(0.333)S(0.333)T(0.333)DDEPK	_LPLLS(ph)STDDEPK_	2	697.826	577
Q3B7Z2	Oxysterol-binding protein 1	Osbp	1	2	S	1.62475e-59	MLAES(1)DDS(1)GDEESVSQTDKTELQSTLR	_M(ox)LAES(ph)DDS(ph)GDEESVSQTDKTELQSTLR_	3	1049.76	188
Q3B7Z2	Oxysterol-binding protein 1	Osbp	0.999958	2	S	1.62475e-59	MLAES(1)DDS(1)GDEESVSQTDKTELQSTLR	_M(ox)LAES(ph)DDS(ph)GDEESVSQTDKTELQSTLR_	3	1049.76	191
Q3B7Z2	Oxysterol-binding protein 1	Osbp	0.81088	3	S	0.000392042	RT(0.191)GS(0.811)NIS(0.954)GAS(0.527)S(0.483)DVS(0.035)LDEQYK	_RTGS(ph)NIS(ph)GAS(ph)SDVSLDEQYK_	2	1177.45	377
Q3B7Z2	Oxysterol-binding protein 1	Osbp	0.984949	2;3	S	3.56413e-06	T(0.539)GS(0.474)NIS(0.985)GAS(0.002)SDVSLDEQYK	_T(ph)GSNIS(ph)GASSDVSLDEQYK_	2	1059.42	380
Q3B7Z2	Oxysterol-binding protein 1	Osbp	0.783179	3	S	0.000392042	T(0.617)GS(0.652)NIS(0.728)GAS(0.783)S(0.195)DVS(0.026)LDEQYK	_TGS(ph)NIS(ph)GAS(ph)SDVSLDEQYK_	2	1099.4	383
Q3TDQ1	Dolichyl-diphosphooligosaccharide--protein glycosyltransferase subunit STT3B	Stt3b	1	2	S	3.64573e-33	ENPPVEDS(1)S(1)DEDDKR	_ENPPVEDS(ph)S(ph)DEDDKR_	2	946.335	495
Q3TDQ1	Dolichyl-diphosphooligosaccharide--protein glycosyltransferase subunit STT3B	Stt3b	1	2	S	3.64573e-33	ENPPVEDS(1)S(1)DEDDKR	_ENPPVEDS(ph)S(ph)DEDDKR_	2	946.335	496
Q9R0U0	Serine/arginine-rich splicing factor 10	Srsf10	0.999984	2	S	0.00105371	S(1)RS(1)FDYNYR	_S(ph)RS(ph)FDYNYR_	2	684.245	131
Q9R0U0	Serine/arginine-rich splicing factor 10	Srsf10	0.999953	2	S	0.00105371	S(1)RS(1)FDYNYR	_S(ph)RS(ph)FDYNYR_	2	684.245	133
Q3U0S6	Ras-interacting protein 1	Rasip1	0.999547	2	S	0.00274458	SVS(1)ELS(1)LQGR	_SVS(ph)ELS(ph)LQGR_	2	618.257	322
Q3U0S6	Ras-interacting protein 1	Rasip1	0.999983	2	S	0.00274458	SVS(1)ELS(1)LQGR	_SVS(ph)ELS(ph)LQGR_	2	618.257	325
Q3UHJ0	AP2-associated protein kinase 1	Aak1	0.544314	2	S	0.0236613	VGS(0.033)LT(0.963)PPS(0.544)S(0.459)PK	_VGSLT(ph)PPS(ph)SPK_	2	615.264	621
Q3UHX2	28 kDa heat- and acid-stable phosphoprotein	Pdap1	1	1;2	S	1.76532e-193	SLDS(1)DES(1)EDEDDDYQQK	_SLDS(ph)DES(ph)EDEDDDYQQK_	2	1089.35	60
Q3UHX2	28 kDa heat- and acid-stable phosphoprotein	Pdap1	1	2	S	1.76532e-193	SLDS(1)DES(1)EDEDDDYQQKR	_SLDS(ph)DES(ph)EDEDDDYQQKR_	2	1167.4	63
Q6PDG5	SWI/SNF complex subunit SMARCC2	Smarcc2	0.991103	2	S	1.28148e-16	KRS(0.991)PS(0.986)PS(0.018)PT(0.005)PEAK	_KRS(ph)PS(ph)PSPTPEAK_	3	514.564	302
Q6PDG5	SWI/SNF complex subunit SMARCC2	Smarcc2	0.985969	2	S	1.28148e-16	KRS(0.991)PS(0.986)PS(0.018)PT(0.005)PEAK	_KRS(ph)PS(ph)PSPTPEAK_	3	514.564	304
Q3UIR3	E3 ubiquitin-protein ligase DTX3L	Dtx3l	0.989384	1	S	0.0204719	AS(0.005)S(0.005)PDPPS(0.989)PLLVR	_(ac)ASSPDPPS(ph)PLLVR_	2	729.355	9
Q3UMU9	Hepatoma-derived growth factor-related protein 2	Hdgfrp2	1	2	S	4.53839e-46	GGS(1)S(1)GEELEDEEPVKK	_GGS(ph)S(ph)GEELEDEEPVKK_	2	925.361	366
Q3UMU9	Hepatoma-derived growth factor-related protein 2	Hdgfrp2	1	2	S	4.53839e-46	GGS(1)S(1)GEELEDEEPVKK	_GGS(ph)S(ph)GEELEDEEPVKK_	2	925.361	367
Q3UPL0	Protein transport protein Sec31A	Sec31a	0.995258	1;2	S	3.21946e-25	DS(0.009)DQVAQS(0.995)DGEES(0.995)PAAEEQLLGER	_DSDQVAQS(ph)DGEES(ph)PAAEEQLLGER_	3	907.358	526
Q3UPL0	Protein transport protein Sec31A	Sec31a	0.995258	2	S	2.88147e-05	DS(0.009)DQVAQS(0.995)DGEES(0.995)PAAEEQLLGER	_DSDQVAQS(ph)DGEES(ph)PAAEEQLLGER_	3	907.358	531
Q3V1V3	ESF1 homolog	Esf1	0.972408	3	S	3.94987e-08	S(0.028)AKDS(0.972)AS(1)S(1)EEETDLEK	_SAKDS(ph)AS(ph)S(ph)EEETDLEK_	2	983.336	686
Q3V1V3	ESF1 homolog	Esf1	0.999928	3	S	3.94987e-08	S(0.028)AKDS(0.972)AS(1)S(1)EEETDLEK	_SAKDS(ph)AS(ph)S(ph)EEETDLEK_	2	983.336	688
Q3V1V3	ESF1 homolog	Esf1	0.999699	3	S	3.94987e-08	S(0.028)AKDS(0.972)AS(1)S(1)EEETDLEK	_SAKDS(ph)AS(ph)S(ph)EEETDLEK_	2	983.336	689
Q4FK66	Pre-mRNA-splicing factor 38A	Prpf38a	0.996348	2	S	0.000123413	VS(0.007)ALEEDMDDVES(0.996)S(0.996)EEEEEEDEKLER	_VSALEEDM(ox)DDVES(ph)S(ph)EEEEEEDEKLER_	3	1082.74	193
Q4FK66	Pre-mRNA-splicing factor 38A	Prpf38a	0.996348	2	S	0.000123413	VS(0.007)ALEEDMDDVES(0.996)S(0.996)EEEEEEDEKLER	_VSALEEDM(ox)DDVES(ph)S(ph)EEEEEEDEKLER_	3	1082.74	194
Q569Z6	Thyroid hormone receptor-associated protein 3	Thrap3	0.999881	2	S	0.00479698	ERS(1)PALKS(0.869)PLQS(0.131)VVVR	_ERS(ph)PALKS(ph)PLQSVVVR_	2	963.484	248
Q569Z6	Thyroid hormone receptor-associated protein 3	Thrap3	0.868885	2	S	0.00479698	ERS(1)PALKS(0.869)PLQS(0.131)VVVR	_ERS(ph)PALKS(ph)PLQSVVVR_	2	963.484	253
Q569Z6	Thyroid hormone receptor-associated protein 3	Thrap3	0.995719	2	S	0.00161522	TDS(0.005)EKPFRGS(0.996)QS(1)PK	_TDSEKPFRGS(ph)QS(ph)PK_	2	862.358	403
Q569Z6	Thyroid hormone receptor-associated protein 3	Thrap3	0.99963	2	S	0.00161522	TDS(0.005)EKPFRGS(0.996)QS(1)PK	_TDSEKPFRGS(ph)QS(ph)PK_	2	862.358	405
Q569Z6	Thyroid hormone receptor-associated protein 3	Thrap3	1	2	S	1.23904e-07	WAHDKFS(1)GEEGEIEDDES(0.816)GT(0.184)ENR	_WAHDKFS(ph)GEEGEIEDDES(ph)GTENR_	3	933.015	924
Q569Z6	Thyroid hormone receptor-associated protein 3	Thrap3	0.81625	2	S	1.23904e-07	WAHDKFS(1)GEEGEIEDDES(0.816)GT(0.184)ENR	_WAHDKFS(ph)GEEGEIEDDES(ph)GTENR_	3	933.015	935
Q5BL07	Peroxisome biogenesis factor 1	Pex1	0.999849	1	S	4.84613e-68	SQS(1)GEDESLNQPGPIK	_SQS(ph)GEDESLNQPGPIK_	2	883.386	1212
Q5SSI6	U3 small nucleolar RNA-associated protein 18 homolog	Utp18	1	3	S	5.06039e-24	GQLHGS(1)S(1)DES(1)EVENEAK	_GQLHGS(ph)S(ph)DES(ph)EVENEAK_	2	1028.35	114
Q5SSI6	U3 small nucleolar RNA-associated protein 18 homolog	Utp18	1	3	S	5.06039e-24	GQLHGS(1)S(1)DES(1)EVENEAK	_GQLHGS(ph)S(ph)DES(ph)EVENEAK_	2	1028.35	115
Q5SSI6	U3 small nucleolar RNA-associated protein 18 homolog	Utp18	1	3	S	5.06039e-24	GQLHGS(1)S(1)DES(1)EVENEAK	_GQLHGS(ph)S(ph)DES(ph)EVENEAK_	2	1028.35	118
Q5U3K5	Rab-like protein 1	Parf	0.879129	2	S	3.20626e-08	NIS(0.17)LS(0.879)S(0.951)EEEAEGLAGHPR	_NISLS(ph)S(ph)EEEAEGLAGHPR_	2	1028.42	482
Q5U3K5	Rab-like protein 1	Parf	0.950577	2	S	3.20626e-08	NIS(0.17)LS(0.879)S(0.951)EEEAEGLAGHPR	_NISLS(ph)S(ph)EEEAEGLAGHPR_	2	1028.42	483
Q5U4C3	Splicing factor, arginine/serine-rich 19	Scaf1	0.978817	2	S	0.00495439	REVLY(0.028)DS(0.979)EGLS(0.994)ADER	_REVLYDS(ph)EGLS(ph)ADER_	2	949.882	691
Q5U4C3	Splicing factor, arginine/serine-rich 19	Scaf1	0.993614	2	S	0.00495439	REVLY(0.028)DS(0.979)EGLS(0.994)ADER	_REVLYDS(ph)EGLS(ph)ADER_	2	949.882	695
Q60668	Heterogeneous nuclear ribonucleoprotein D0	Hnrnpd	0.622587	2	S	0.0325208	IDAS(0.45)KNEEDEGHS(0.623)NS(0.732)S(0.196)PR	_IDASKNEEDEGHS(ph)NS(ph)SPR_	3	711.27	80
Q60668	Heterogeneous nuclear ribonucleoprotein D0	Hnrnpd	0.731503	2	S	2.27445e-27	IDAS(0.45)KNEEDEGHS(0.623)NS(0.732)S(0.196)PR	_IDASKNEEDEGHS(ph)NS(ph)SPR_	3	711.27	82
Q60668	Heterogeneous nuclear ribonucleoprotein D0	Hnrnpd	0.494376		S	2.27445e-27	IDASKNEEDEGHS(0.011)NS(0.494)S(0.494)PR	_IDASKNEEDEGHSNS(ph)SPR_	2	1026.42	83
Q61033	Lamina-associated polypeptide 2, isoforms alpha/zeta	Tmpo	0.922418	2	S	0.0010857	GPPDFS(0.922)S(0.891)DEEREPT(0.179)PVLGS(0.005)GAS(0.003)VGR	_GPPDFS(ph)S(ph)DEEREPTPVLGSGASVGR_	3	901.716	66
Q61033	Lamina-associated polypeptide 2, isoforms alpha/zeta	Tmpo	0.891242	2	S	0.0010857	GPPDFS(0.922)S(0.891)DEEREPT(0.179)PVLGS(0.005)GAS(0.003)VGR	_GPPDFS(ph)S(ph)DEEREPTPVLGSGASVGR_	3	901.716	67
Q61033	Lamina-associated polypeptide 2, isoforms alpha/zeta	Tmpo	0.666613	2	S	0.000511968	S(0.667)S(0.667)T(0.667)PLPTVSSSAENTR	_S(ph)S(ph)TPLPTVSSSAENTR_	2	897.371	157
Q61033	Lamina-associated polypeptide 2, isoforms alpha/zeta	Tmpo	0.666614	2	S	0.000511968	S(0.667)S(0.667)T(0.667)PLPTVSSSAENTR	_S(ph)S(ph)TPLPTVSSSAENTR_	2	897.371	158
Q61136	Serine/threonine-protein kinase PRP4 homolog	Prpf4b	1	2	S	0.00575695	EVIEAS(1)DKEGLS(1)PAKR	_EVIEAS(ph)DKEGLS(ph)PAKR_	2	944.926	88
Q61136	Serine/threonine-protein kinase PRP4 homolog	Prpf4b	1	2	S	0.00575695	EVIEAS(1)DKEGLS(1)PAKR	_EVIEAS(ph)DKEGLS(ph)PAKR_	2	944.926	94
Q61136	Serine/threonine-protein kinase PRP4 homolog	Prpf4b	1	2	S	0.001617	S(1)KS(1)PVDLR	_S(ph)KS(ph)PVDLR_	2	531.225	292
Q61136	Serine/threonine-protein kinase PRP4 homolog	Prpf4b	1	2	S	0.001617	S(1)KS(1)PVDLR	_S(ph)KS(ph)PVDLR_	2	531.225	294
Q61586	Glycerol-3-phosphate acyltransferase 1, mitochondrial	Gpam	1	1;2	S	1.92071e-71	SDEEDEDS(1)DFGEEQR	_SDEEDEDS(ph)DFGEEQR_	2	933.813	694
Q62261	Spectrin beta chain, brain 1	Sptbn1	0.649709	4	S	0.00417674	T(0.625)S(0.65)S(0.652)KES(0.536)S(0.536)PVPS(0.831)PT(0.17)LDRK	_TS(ph)S(ph)KES(ph)SPVPS(ph)PTLDRK_	2	1068.41	2159
Q62261	Spectrin beta chain, brain 1	Sptbn1	0.722384	3;4	S	4.7039e-09	T(0.118)S(0.133)S(0.722)KES(0.238)S(0.788)PVPS(0.91)PT(0.09)LDR	_TSS(ph)KESS(ph)PVPS(ph)PTLDR_	2	964.378	2160
Q62261	Spectrin beta chain, brain 1	Sptbn1	0.623171	3;4	S	4.7039e-09	T(0.097)S(0.113)S(0.686)KES(0.623)S(0.481)PVPS(0.993)PT(0.007)LDRK	_TSS(ph)KES(ph)SPVPS(ph)PTLDRK_	2	1028.43	2163
Q62261	Spectrin beta chain, brain 1	Sptbn1	0.788456	3;4	S	3.55543e-05	T(0.118)S(0.133)S(0.722)KES(0.238)S(0.788)PVPS(0.91)PT(0.09)LDR	_TSS(ph)KESS(ph)PVPS(ph)PTLDR_	2	964.378	2164
Q62261	Spectrin beta chain, brain 1	Sptbn1	0.992708	3;4	S	4.7039e-09	T(0.097)S(0.113)S(0.686)KES(0.623)S(0.481)PVPS(0.993)PT(0.007)LDRK	_TSS(ph)KES(ph)SPVPS(ph)PTLDRK_	2	1028.43	2168
Q62318	Transcription intermediary factor 1-beta	Trim28	0.988795	1	S	1.14096e-54	AASAAATAAASAATAASAAS(0.002)GS(0.989)PGS(0.008)GEGS(0.001)AGGEK	_(ac)AASAAATAAASAATAASAASGS(ph)PGSGEGSAGGEK_	3	948.416	23
Q62318	Transcription intermediary factor 1-beta	Trim28	0.994533	1	S	0.0285363	S(0.005)RS(0.995)GEGEVSGLLR	_SRS(ph)GEGEVSGLLR_	2	713.838	473
Q6DFZ1		Gbf1	0.741385	1	S	0.0108214	ADAPDAGAQS(0.741)DS(0.214)ELPS(0.025)Y(0.018)HQNDVS(0.001)LDR	_ADAPDAGAQS(ph)DSELPSYHQNDVSLDR_	3	946.733	1298
Q6NXI6	Regulation of nuclear pre-mRNA domain-containing protein 2	Rprd2	0.990709	1	S	0.00945203	DVEDMELS(0.991)DVEDDGS(0.009)K	_DVEDM(ox)ELS(ph)DVEDDGSK_	2	939.845	392
Q6P4T2		Snrnp200	1	1	S	9.95468e-09	EEAS(1)DDDMEGDEAVVR	_EEAS(ph)DDDM(ox)EGDEAVVR_	2	931.835	225
Q99L43	Phosphatidate cytidylyltransferase 2	Cds2	0.541289	2	S	0.000212817	EDAPPEDKES(0.458)ES(0.541)EAKLDGET(0.324)AS(0.555)DS(0.085)ES(0.036)R	_EDAPPEDKESES(ph)EAKLDGETAS(ph)DSESR_	3	1023.4	22
Q99L43	Phosphatidate cytidylyltransferase 2	Cds2	0.555434	2	S	0.000212817	EDAPPEDKES(0.458)ES(0.541)EAKLDGET(0.324)AS(0.555)DS(0.085)ES(0.036)R	_EDAPPEDKESES(ph)EAKLDGETAS(ph)DSESR_	3	1023.4	32
Q6PGL7	WASH complex subunit FAM21	Fam21	1	2	S	0.000115654	AGNS(1)DS(1)EEDDANERVDLILEPK	_AGNS(ph)DS(ph)EEDDANERVDLILEPK_	3	859.353	157
Q6PGL7	WASH complex subunit FAM21	Fam21	1	2	S	0.000115654	AGNS(1)DS(1)EEDDANERVDLILEPK	_AGNS(ph)DS(ph)EEDDANERVDLILEPK_	3	859.353	159
Q6ZQ58	La-related protein 1	Larp1	0.550822	2	S	0.0194808	KNT(0.083)FT(0.219)AWS(0.551)EEDS(0.758)DY(0.389)EIDDRDVNK	_KNTFTAWS(ph)EEDS(ph)DYEIDDRDVNK_	3	979.721	604
Q6ZQ58	La-related protein 1	Larp1	0.758233	2	S	0.0194808	KNT(0.083)FT(0.219)AWS(0.551)EEDS(0.758)DY(0.389)EIDDRDVNK	_KNTFTAWS(ph)EEDS(ph)DYEIDDRDVNK_	3	979.721	608
Q6ZQ58	La-related protein 1	Larp1	0.999267	2	S	4.95281e-08	S(0.999)LPTTVPES(1)PNYR	_S(ph)LPTTVPES(ph)PNYR_	2	810.839	743
Q6ZQ58	La-related protein 1	Larp1	0.999788	2	S	4.95281e-08	S(0.999)LPTTVPES(1)PNYR	_S(ph)LPTTVPES(ph)PNYR_	2	810.839	751
Q7TNV0	Protein DEK	Dek	1	4	S	8.1462e-13	KES(1)ES(1)EDS(1)S(1)DDEPLIKK	_KES(ph)ES(ph)EDS(ph)S(ph)DDEPLIKK_	2	1128.39	306
Q7TNV0	Protein DEK	Dek	1	4	S	8.1462e-13	KES(1)ES(1)EDS(1)S(1)DDEPLIKK	_KES(ph)ES(ph)EDS(ph)S(ph)DDEPLIKK_	2	1128.39	308
Q7TNV0	Protein DEK	Dek	1	4	S	8.1462e-13	KES(1)ES(1)EDS(1)S(1)DDEPLIKK	_KES(ph)ES(ph)EDS(ph)S(ph)DDEPLIKK_	2	1128.39	311
Q7TNV0	Protein DEK	Dek	1	4	S	8.1462e-13	KES(1)ES(1)EDS(1)S(1)DDEPLIKK	_KES(ph)ES(ph)EDS(ph)S(ph)DDEPLIKK_	2	1128.39	312
Q80UJ7	Rab3 GTPase-activating protein catalytic subunit	Rab3gap1	0.998602	2	S	0.0360869	LS(0.002)VS(0.999)NMVHT(1)AK	_LSVS(ph)NM(ox)VHT(ph)AK_	2	681.78	381
Q80UR4		Prss34	0.905515	1	S	0.029912	VMS(0.906)Y(0.092)VS(0.002)WIK	_VM(ox)S(ph)YVSWIK_	2	604.775	272
Q8BGU5	Cyclin-Y	Ccny	0.979567	1	S	1.05827e-10	S(0.02)AS(0.98)ADNLILPR	_SAS(ph)ADNLILPR_	2	618.803	326
Q8BL97	Serine/arginine-rich splicing factor 7	Srsf7	0.994541	2	S	0.0177228	S(0.995)RS(0.962)GS(0.043)IIGSR	_S(ph)RS(ph)GSIIGSR_	2	590.25	208
Q8BL97	Serine/arginine-rich splicing factor 7	Srsf7	0.962339	2	S	0.0177228	S(0.995)RS(0.962)GS(0.043)IIGSR	_S(ph)RS(ph)GSIIGSR_	2	590.25	210
Q8BP27	Swi5-dependent recombination DNA repair protein 1 homolog	Sfr1	0.999844	2	S	3.10334e-39	ENPPS(1)PPT(0.125)S(0.875)PAAPQPR	_ENPPS(ph)PPTS(ph)PAAPQPR_	2	901.879	67
Q8BP27	Swi5-dependent recombination DNA repair protein 1 homolog	Sfr1	0.874782	2	S	3.10334e-39	ENPPS(1)PPT(0.125)S(0.875)PAAPQPR	_ENPPS(ph)PPTS(ph)PAAPQPR_	2	901.879	71
Q8BTI8	Serine/arginine repetitive matrix protein 2	Srrm2	1	4	S	9.27977e-40	AQS(1)GT(1)DS(1)S(1)PEHKIPAPR	_AQS(ph)GT(ph)DS(ph)S(ph)PEHKIPAPR_	3	699.921	1572
Q8BTI8	Serine/arginine repetitive matrix protein 2	Srrm2	1	4	S	9.27977e-40	AQS(1)GT(1)DS(1)S(1)PEHKIPAPR	_AQS(ph)GT(ph)DS(ph)S(ph)PEHKIPAPR_	3	699.921	1576
Q8BTI8	Serine/arginine repetitive matrix protein 2	Srrm2	1	4	S	9.27977e-40	AQS(1)GT(1)DS(1)S(1)PEHKIPAPR	_AQS(ph)GT(ph)DS(ph)S(ph)PEHKIPAPR_	3	699.921	1577
Q8BTI8	Serine/arginine repetitive matrix protein 2	Srrm2	1	3;4	S	1.44078e-45	HAS(1)S(1)S(1)PES(1)LKPTPAPGSR	_HAS(ph)S(ph)S(ph)PES(ph)LKPTPAPGSR_	2	1063.39	433
Q8BTI8	Serine/arginine repetitive matrix protein 2	Srrm2	1	3;4	S	1.44078e-45	HAS(1)S(1)S(1)PES(1)LKPTPAPGSR	_HAS(ph)S(ph)S(ph)PES(ph)LKPTPAPGSR_	2	1063.39	434
Q8BTI8	Serine/arginine repetitive matrix protein 2	Srrm2	1	3;4	S	1.44078e-45	HAS(1)S(1)S(1)PES(1)LKPTPAPGSR	_HAS(ph)S(ph)S(ph)PES(ph)LKPTPAPGSR_	2	1063.39	435
Q8BTI8	Serine/arginine repetitive matrix protein 2	Srrm2	0.999917	3;4	S	1.44078e-45	HAS(1)S(1)S(1)PES(1)LKPTPAPGSR	_HAS(ph)S(ph)S(ph)PES(ph)LKPTPAPGSR_	3	709.265	438
Q8BTI8	Serine/arginine repetitive matrix protein 2	Srrm2	0.999991	3	S	2.44524e-05	NHS(1)GS(1)RT(1)PPVALSSSR	_NHS(ph)GS(ph)RT(ph)PPVALSSSR_	3	631.587	2052
Q8BTI8	Serine/arginine repetitive matrix protein 2	Srrm2	0.999985	3	S	2.44524e-05	NHS(1)GS(1)RT(1)PPVALSSSR	_NHS(ph)GS(ph)RT(ph)PPVALSSSR_	3	631.587	2054
Q8BTI8	Serine/arginine repetitive matrix protein 2	Srrm2	0.926138	1	S	0.0207984	PS(0.015)MS(0.926)PT(0.058)PLDR	_PSM(ox)S(ph)PTPLDR_	2	598.755	2075
Q8BTI8	Serine/arginine repetitive matrix protein 2	Srrm2	1	4	S	2.99774e-10	RRS(1)PS(1)VS(1)S(1)PEPTEK	_RRS(ph)PS(ph)VS(ph)S(ph)PEPTEK_	3	626.228	1683
Q8BTI8	Serine/arginine repetitive matrix protein 2	Srrm2	1	4	S	2.99774e-10	RRS(1)PS(1)VS(1)S(1)PEPTEK	_RRS(ph)PS(ph)VS(ph)S(ph)PEPTEK_	3	626.228	1685
Q8BTI8	Serine/arginine repetitive matrix protein 2	Srrm2	0.999997	4	S	2.99774e-10	RRS(1)PS(1)VS(1)S(1)PEPTEK	_RRS(ph)PS(ph)VS(ph)S(ph)PEPTEK_	3	626.228	1687
Q8BTI8	Serine/arginine repetitive matrix protein 2	Srrm2	0.999988	4	S	2.99774e-10	RRS(1)PS(1)VS(1)S(1)PEPTEK	_RRS(ph)PS(ph)VS(ph)S(ph)PEPTEK_	3	626.228	1688
Q8BTI8	Serine/arginine repetitive matrix protein 2	Srrm2	0.996636	2;3;4	S	1.62099e-25	RS(0.997)S(0.995)S(0.008)ELS(1)PEVVEK	_RS(ph)S(ph)SELS(ph)PEVVEK_	2	843.825	1338
Q8BTI8	Serine/arginine repetitive matrix protein 2	Srrm2	0.995071	2;3;4	S	1.62099e-25	RS(0.997)S(0.995)S(0.008)ELS(1)PEVVEK	_RS(ph)S(ph)SELS(ph)PEVVEK_	2	843.825	1339
Q8BTI8	Serine/arginine repetitive matrix protein 2	Srrm2	0.999984	2;3;4	S	1.62099e-25	RS(0.997)S(0.995)S(0.008)ELS(1)PEVVEK	_RS(ph)S(ph)SELS(ph)PEVVEK_	2	843.825	1343
Q8BTI8	Serine/arginine repetitive matrix protein 2	Srrm2	0.99999	3	S	0.00257105	S(1)LS(1)Y(0.001)S(1)PVER	_S(ph)LS(ph)YS(ph)PVER_	2	639.216	2644
Q8BTI8	Serine/arginine repetitive matrix protein 2	Srrm2	0.999665	3	S	0.00257105	S(1)LS(1)Y(0.001)S(1)PVER	_S(ph)LS(ph)YS(ph)PVER_	2	639.216	2646
Q8BTI8	Serine/arginine repetitive matrix protein 2	Srrm2	0.999604	3	S	0.00257105	S(1)LS(1)Y(0.001)S(1)PVER	_S(ph)LS(ph)YS(ph)PVER_	2	639.216	2648
Q8BTI8	Serine/arginine repetitive matrix protein 2	Srrm2	0.597585	2	S	0.0146797	S(0.598)LT(0.529)RS(0.874)PPAIR	_S(ph)LTRS(ph)PPAIR_	2	629.291	2019
Q8BTI8	Serine/arginine repetitive matrix protein 2	Srrm2	0.873904	2	S	0.0146797	S(0.598)LT(0.529)RS(0.874)PPAIR	_S(ph)LTRS(ph)PPAIR_	2	629.291	2023
Q8BTI8	Serine/arginine repetitive matrix protein 2	Srrm2	1	2	S	0.015009	S(1)RS(1)PLAIR	_S(ph)RS(ph)PLAIR_	2	530.241	1996
Q8BTI8	Serine/arginine repetitive matrix protein 2	Srrm2	1	2	S	0.015009	S(1)RS(1)PLAIR	_S(ph)RS(ph)PLAIR_	2	530.241	1998
Q8BTI8	Serine/arginine repetitive matrix protein 2	Srrm2	0.999998	3	S	0.00202478	S(1)RS(1)RT(1)PLISR	_S(ph)RS(ph)RT(ph)PLISR_	2	706.796	1832
Q8BTI8	Serine/arginine repetitive matrix protein 2	Srrm2	0.999946	3	S	0.00202478	S(1)RS(1)RT(1)PLISR	_S(ph)RS(ph)RT(ph)PLISR_	2	706.796	1834
Q8BTI8	Serine/arginine repetitive matrix protein 2	Srrm2	1	3	S	0.00725032	S(1)RS(1)RT(1)PLLPR	_S(ph)RS(ph)RT(ph)PLLPR_	2	711.806	1982
Q8BTI8	Serine/arginine repetitive matrix protein 2	Srrm2	1	3	S	0.00725032	S(1)RS(1)RT(1)PLLPR	_S(ph)RS(ph)RT(ph)PLLPR_	2	711.806	1984
Q8BTI8	Serine/arginine repetitive matrix protein 2	Srrm2	0.999442	2	S	0.0114067	S(0.999)RT(1)PPS(0.001)APSQSR	_S(ph)RT(ph)PPSAPSQSR_	2	715.795	2360
Q8BTI8	Serine/arginine repetitive matrix protein 2	Srrm2	0.62981	4	S	0.0101319	S(0.607)S(0.63)RRS(0.692)S(0.602)S(0.521)ELS(0.949)PEVVEK	_SS(ph)RRS(ph)S(ph)SELS(ph)PEVVEK_	2	1048.89	1335
Q8BU14	Translocation protein SEC62	Sec62	1	4	S	0.000331837	GAPADHGPEGS(1)GGERHS(1)DT(1)DS(1)DRR	_GAPADHGPEGS(ph)GGERHS(ph)DT(ph)DS(ph)DRR_	3	928.314	335
Q8BU14	Translocation protein SEC62	Sec62	1	4	S	0.000331837	GAPADHGPEGS(1)GGERHS(1)DT(1)DS(1)DRR	_GAPADHGPEGS(ph)GGERHS(ph)DT(ph)DS(ph)DRR_	3	928.314	341
Q8BU14	Translocation protein SEC62	Sec62	1	4	S	0.000331837	GAPADHGPEGS(1)GGERHS(1)DT(1)DS(1)DRR	_GAPADHGPEGS(ph)GGERHS(ph)DT(ph)DS(ph)DRR_	3	928.314	345
Q8C0N2	Glycerol-3-phosphate acyltransferase 3	Agpat9	0.997662	1	S	0.0133797	NS(0.002)AS(0.998)VGIIQR	_NSAS(ph)VGIIQR_	2	562.777	68
Q8C142	Low density lipoprotein receptor adapter protein 1	Ldlrap1	0.863662	1	S	0.0347319	RDS(0.864)T(0.132)PS(0.004)LK	_RDS(ph)TPSLK_	2	492.232	198
Q8C1D8	Protein IWS1 homolog	Iws1	0.977694	2	S	8.83117e-29	ETT(0.022)VAS(0.978)DS(1)EEEAGKEESSVK	_ETTVAS(ph)DS(ph)EEEAGKEESSVK_	2	1136.44	384
Q8C1D8	Protein IWS1 homolog	Iws1	0.999892	2	S	8.83117e-29	ETT(0.022)VAS(0.978)DS(1)EEEAGKEESSVK	_ETTVAS(ph)DS(ph)EEEAGKEESSVK_	2	1136.44	386
Q8C1D8	Protein IWS1 homolog	Iws1	1	3	S	1.17257e-18	GLHS(1)S(1)DS(1)EEEEPKR	_GLHS(ph)S(ph)DS(ph)EEEEPKR_	2	920.315	306
Q8C1D8	Protein IWS1 homolog	Iws1	1	3	S	1.17257e-18	GLHS(1)S(1)DS(1)EEEEPKR	_GLHS(ph)S(ph)DS(ph)EEEEPKR_	2	920.315	307
Q8C1D8	Protein IWS1 homolog	Iws1	1	3	S	1.17257e-18	GLHS(1)S(1)DS(1)EEEEPKR	_GLHS(ph)S(ph)DS(ph)EEEEPKR_	2	920.315	309
Q8C1D8	Protein IWS1 homolog	Iws1	1	2	S	4.30461e-17	IS(1)DS(0.999)ES(0.001)EELPKPR	_IS(ph)DS(ph)ESEELPKPR_	2	823.839	183
Q8C1D8	Protein IWS1 homolog	Iws1	0.999336	2	S	4.30461e-17	IS(1)DS(0.999)ES(0.001)EELPKPR	_IS(ph)DS(ph)ESEELPKPR_	2	823.839	185
Q8C1D8	Protein IWS1 homolog	Iws1	0.935228	4	S	2.09245e-06	VS(0.935)DS(0.947)ES(0.118)EDPPRPQAS(0.899)DS(0.583)ES(0.518)EELPKPR	_VS(ph)DS(ph)ESEDPPRPQAS(ph)DS(ph)ESEELPKPR_	3	1063.4	196
Q8C1D8	Protein IWS1 homolog	Iws1	0.946539	4	S	2.09245e-06	VS(0.935)DS(0.947)ES(0.118)EDPPRPQAS(0.899)DS(0.583)ES(0.518)EELPKPR	_VS(ph)DS(ph)ESEDPPRPQAS(ph)DS(ph)ESEELPKPR_	3	1063.4	198
Q8C1D8	Protein IWS1 homolog	Iws1	0.898553	4	S	2.09245e-06	VS(0.935)DS(0.947)ES(0.118)EDPPRPQAS(0.899)DS(0.583)ES(0.518)EELPKPR	_VS(ph)DS(ph)ESEDPPRPQAS(ph)DS(ph)ESEELPKPR_	3	1063.4	209
Q8C1D8	Protein IWS1 homolog	Iws1	0.583063	4	S	2.09245e-06	VS(0.935)DS(0.947)ES(0.118)EDPPRPQAS(0.899)DS(0.583)ES(0.518)EELPKPR	_VS(ph)DS(ph)ESEDPPRPQAS(ph)DS(ph)ESEELPKPR_	3	1063.4	211
Q8C4Y1		Max	1	1;2	S	4.01404e-59	S(1)DNDDIEVES(1)DADKR	_(ac)S(ph)DNDDIEVES(ph)DADKR_	2	955.34	2
Q8C4Y1		Max	1	2	S	1.38256e-10	S(1)DNDDIEVES(1)DADKR	_(ac)S(ph)DNDDIEVES(ph)DADKR_	2	955.34	11
Q8CCJ3	E3 UFM1-protein ligase 1	Ufl1	0.987365	1	S	0.014354	GRKDEDS(0.987)DDES(0.009)QS(0.003)S(0.001)HGGK	_GRKDEDS(ph)DDESQSSHGGK_	3	671.931	458
Q8JZQ9	Eukaryotic translation initiation factor 3 subunit B	Eif3b	0.795418	2	S	9.13703e-09	AKPAAQS(0.003)EEET(0.019)AT(0.182)S(0.795)PAAS(0.945)PT(0.052)PQS(0.004)AER	_AKPAAQSEEETATS(ph)PAAS(ph)PTPQSAER_	3	924.73	75
Q8JZQ9	Eukaryotic translation initiation factor 3 subunit B	Eif3b	0.964476	2	S	1.12652e-46	AKPAAQSEEETAT(0.815)S(0.185)PAAS(0.964)PT(0.035)PQSAER	_AKPAAQSEEETAT(ph)SPAAS(ph)PTPQSAER_	2	1386.59	79
Q8JZQ9	Eukaryotic translation initiation factor 3 subunit B	Eif3b	1	2	S	1.28168e-119	GHPSAGAEEEGGS(1)DGS(1)AAEAEPR	_GHPSAGAEEEGGS(ph)DGS(ph)AAEAEPR_	2	1164.43	120
Q8JZQ9	Eukaryotic translation initiation factor 3 subunit B	Eif3b	1	2	S	1.28168e-119	GHPSAGAEEEGGS(1)DGS(1)AAEAEPR	_GHPSAGAEEEGGS(ph)DGS(ph)AAEAEPR_	2	1164.43	123
Q8K019	Bcl-2-associated transcription factor 1	Bclaf1	0.77163	2	S	0.00333894	Y(0.218)S(0.772)PS(0.065)QNS(0.943)PIHHIPS(0.002)R	_YS(ph)PSQNS(ph)PIHHIPSR_	3	627.268	284
Q8K019	Bcl-2-associated transcription factor 1	Bclaf1	0.779118	2	S	6.34088e-05	Y(0.051)S(0.174)PS(0.779)QNS(0.995)PIHHIPSR	_YSPS(ph)QNS(ph)PIHHIPSR_	2	940.398	286
Q8K019	Bcl-2-associated transcription factor 1	Bclaf1	0.995495	2	S	6.34088e-05	Y(0.051)S(0.174)PS(0.779)QNS(0.995)PIHHIPSR	_YSPS(ph)QNS(ph)PIHHIPSR_	2	940.398	289
Q8K2C9	3-hydroxyacyl-CoA dehydratase 3	ptplad1	1	1	S	0.00279851	WLDES(1)DAEMELR	_WLDES(ph)DAEM(ox)ELR_	2	795.313	114
Q8K3X4	Interferon regulatory factor 2-binding protein-like	Irf2bpl	0.869224	3	S	0.000762596	RNS(0.869)S(0.617)S(0.518)PVS(0.983)PAS(0.013)VPGQR	_RNS(ph)S(ph)SPVS(ph)PASVPGQR_	2	933.371	636
Q8K3X4	Interferon regulatory factor 2-binding protein-like	Irf2bpl	0.616784	3	S	0.000762596	RNS(0.869)S(0.617)S(0.518)PVS(0.983)PAS(0.013)VPGQR	_RNS(ph)S(ph)SPVS(ph)PASVPGQR_	2	933.371	637
Q8K3X4	Interferon regulatory factor 2-binding protein-like	Irf2bpl	0.423573	3	S	0.0141783	NS(0.241)S(0.39)S(0.424)PVS(0.913)PAS(0.033)VPGQR	_NSSS(ph)PVS(ph)PASVPGQR_	2	815.337	638
Q8K3X4	Interferon regulatory factor 2-binding protein-like	Irf2bpl	0.982928	2;3	S	0.000762596	RNS(0.869)S(0.617)S(0.518)PVS(0.983)PAS(0.013)VPGQR	_RNS(ph)S(ph)SPVS(ph)PASVPGQR_	2	933.371	641
Q8N7N5	DDB1- and CUL4-associated factor 8	Dcaf8	1	1	S	3.16233e-25	GHGHS(1)DEEDEEQPR	_GHGHS(ph)DEEDEEQPR_	3	567.876	100
Q8R5F7	Interferon-induced helicase C domain-containing protein 1	Ifih1	0.997104	1;2	S	1.04137e-17	DS(0.001)GT(0.001)MGS(0.997)DS(0.974)DES(0.026)VIQTK	_DSGTM(ox)GS(ph)DS(ph)DESVIQTK_	2	966.845	289
Q8R5F7	Interferon-induced helicase C domain-containing protein 1	Ifih1	0.973637	2	S	1.04137e-17	DS(0.001)GT(0.001)MGS(0.997)DS(0.974)DES(0.026)VIQTK	_DSGTM(ox)GS(ph)DS(ph)DESVIQTK_	2	966.845	291
Q8VBT0	Thioredoxin-related transmembrane protein 1	Tmx1	1	1	S	8.82733e-33	KVEEEQEADEEDVS(1)EEEAEDR	_KVEEEQEADEEDVS(ph)EEEAEDR_	2	1287.5	245
Q91WM3	U3 small nucleolar RNA-interacting protein 2	Rrp9	0.931498	3	S	0.00132913	MNEEIS(0.931)S(0.931)DS(0.785)ES(0.263)ES(0.089)LAPR	_M(ox)NEEIS(ph)S(ph)DS(ph)ESESLAPR_	2	1068.86	50
Q91WM3	U3 small nucleolar RNA-interacting protein 2	Rrp9	0.931498	3	S	0.00132913	MNEEIS(0.931)S(0.931)DS(0.785)ES(0.263)ES(0.089)LAPR	_M(ox)NEEIS(ph)S(ph)DS(ph)ESESLAPR_	2	1068.86	51
Q91WM3	U3 small nucleolar RNA-interacting protein 2	Rrp9	0.785126	3	S	0.00132913	MNEEIS(0.931)S(0.931)DS(0.785)ES(0.263)ES(0.089)LAPR	_M(ox)NEEIS(ph)S(ph)DS(ph)ESESLAPR_	2	1068.86	53
Q9Z2F7	BCL2/adenovirus E1B 19 kDa protein-interacting protein 3-like	Bnip3l	1	3	S	0.00106398	DHS(1)S(1)QS(1)EEEVVEGEK	_DHS(ph)S(ph)QS(ph)EEEVVEGEK_	2	964.815	116
Q9Z2F7	BCL2/adenovirus E1B 19 kDa protein-interacting protein 3-like	Bnip3l	1	3	S	0.00106398	DHS(1)S(1)QS(1)EEEVVEGEK	_DHS(ph)S(ph)QS(ph)EEEVVEGEK_	2	964.815	117
Q9Z2F7	BCL2/adenovirus E1B 19 kDa protein-interacting protein 3-like	Bnip3l	1	3	S	0.00106398	DHS(1)S(1)QS(1)EEEVVEGEK	_DHS(ph)S(ph)QS(ph)EEEVVEGEK_	2	964.815	119
Q91ZX7	Prolow-density lipoprotein receptor-related protein 1	Lrp1	1	2	S	9.04935e-15	HS(1)LAS(0.996)T(0.004)DEKR	_HS(ph)LAS(ph)TDEKR_	2	652.258	4521
Q91ZX7	Prolow-density lipoprotein receptor-related protein 1	Lrp1	0.995674	2	S	9.04935e-15	HS(1)LAS(0.996)T(0.004)DEKR	_HS(ph)LAS(ph)TDEKR_	2	652.258	4524
Q9QXY1	Tight junction protein ZO-3	Tjp3	1	1	S	0.0387887	RNS(1)EEFGVK	_RNS(ph)EEFGVK_	2	573.253	195
Q924Z4	Ceramide synthase 2	Cers2	1	3;4	S	4.01488e-73	LIEDERS(1)DREET(1)ES(1)S(1)EGEETAAGAGAK	_LIEDERS(ph)DREET(ph)ES(ph)S(ph)EGEETAAGAGAK_	3	1062.72	341
Q924Z4	Ceramide synthase 2	Cers2	0.999999	3;4	S	4.01488e-73	LIEDERS(1)DREET(1)ES(1)S(1)EGEETAAGAGAK	_LIEDERS(ph)DREET(ph)ES(ph)S(ph)EGEETAAGAGAK_	3	1062.72	348
Q924Z4	Ceramide synthase 2	Cers2	0.999977	3;4	S	4.01488e-73	LIEDERS(1)DREET(1)ES(1)S(1)EGEETAAGAGAK	_LIEDERS(ph)DREET(ph)ES(ph)S(ph)EGEETAAGAGAK_	3	1062.72	349
Q99J36	THUMP domain-containing protein 1	Thumpd1	1	2	S	5.09699e-46	FIDKDQQPS(1)GS(1)EGEDDDAEAALKK	_FIDKDQQPS(ph)GS(ph)EGEDDDAEAALKK_	3	918.379	86
Q99J36	THUMP domain-containing protein 1	Thumpd1	1	2	S	5.09699e-46	FIDKDQQPS(1)GS(1)EGEDDDAEAALKK	_FIDKDQQPS(ph)GS(ph)EGEDDDAEAALKK_	3	918.379	88
Q99KG3	RNA-binding protein 10	Rbm10	0.936175	3	S	2.17248e-06	GLVAAY(0.064)S(0.936)GES(1)DS(1)EEEQER	_GLVAAYS(ph)GES(ph)DS(ph)EEEQER_	2	1098.38	733
Q99KG3	RNA-binding protein 10	Rbm10	0.999797	3	S	2.17248e-06	GLVAAY(0.064)S(0.936)GES(1)DS(1)EEEQER	_GLVAAYS(ph)GES(ph)DS(ph)EEEQER_	2	1098.38	736
Q99KG3	RNA-binding protein 10	Rbm10	0.99998	3	S	2.17248e-06	GLVAAY(0.064)S(0.936)GES(1)DS(1)EEEQER	_GLVAAYS(ph)GES(ph)DS(ph)EEEQER_	2	1098.38	738
Q99L45	Eukaryotic translation initiation factor 2 subunit 2	Eif2s2	1	1	S	2.8184e-06	S(1)GDEMIFDPTMSK	_(ac)S(ph)GDEM(ox)IFDPTM(ox)SK_	2	806.301	2
Q99MZ3	Carbohydrate-responsive element-binding protein	Mlxipl	0.831445	3	S	0.00360051	VVPS(0.831)PDS(0.445)DS(0.857)DT(0.857)DLEDPS(0.009)PR	_VVPS(ph)PDSDS(ph)DT(ph)DLEDPSPR_	2	1134.41	20
Q99MZ3	Carbohydrate-responsive element-binding protein	Mlxipl	0.987811	2	S	2.9213e-10	VVPS(0.007)PDS(0.988)DS(0.961)DT(0.044)DLEDPSPR	_VVPSPDS(ph)DS(ph)DTDLEDPSPR_	2	1094.42	23
Q99MZ3	Carbohydrate-responsive element-binding protein	Mlxipl	0.960935	2;3	S	2.9213e-10	VVPS(0.007)PDS(0.988)DS(0.961)DT(0.044)DLEDPSPR	_VVPSPDS(ph)DS(ph)DTDLEDPSPR_	2	1094.42	25
Q9CQS8	Protein transport protein Sec61 subunit beta	Sec61b	0.311442		S	0.0158451	PGPTPS(0.001)GT(0.001)NVGS(0.311)S(0.311)GRS(0.311)PS(0.063)K	_PGPTPSGTNVGS(ph)SGRSPSK_	3	617.286	13
Q9CQS8	Protein transport protein Sec61 subunit beta	Sec61b	0.311442		S	0.0158451	PGPTPS(0.001)GT(0.001)NVGS(0.311)S(0.311)GRS(0.311)PS(0.063)K	_PGPTPSGTNVGS(ph)SGRSPSK_	3	617.286	14
Q9CQS8	Protein transport protein Sec61 subunit beta	Sec61b	0.97753	1	S	4.84585e-68	PGPTPSGTNVGS(0.004)S(0.012)GRS(0.978)PS(0.007)K	_PGPTPSGTNVGSSGRS(ph)PSK_	2	925.426	17
Q9CQU1	Microfibrillar-associated protein 1	Mfap1	1	2	S	1.67076e-17	LEREDS(1)S(1)EEEEEEIDDEEIER	_LEREDS(ph)S(ph)EEEEEEIDDEEIER_	3	923.678	132
Q9CQU1	Microfibrillar-associated protein 1	Mfap1	1	2	S	1.67076e-17	LEREDS(1)S(1)EEEEEEIDDEEIER	_LEREDS(ph)S(ph)EEEEEEIDDEEIER_	3	923.678	133
Q9CQU3	Protein RER1	Rer1	0.93481	1	S	0.00464984	VDPS(0.013)LMEDS(0.935)DDGPS(0.049)LPT(0.003)K	_VDPSLM(ox)EDS(ph)DDGPSLPTK_	2	999.916	95
Q9CQV4	Protein FAM134C	Fam134c	0.815918	2;4	S	2.07784e-05	GQT(0.001)PLT(0.194)EGS(0.816)EDLDGHS(0.983)DPEES(0.006)FAR	_GQTPLTEGS(ph)EDLDGHS(ph)DPEESFAR_	3	912.023	313
Q9CQV4	Protein FAM134C	Fam134c	0.98317	2;4	S	2.07784e-05	GQT(0.001)PLT(0.194)EGS(0.816)EDLDGHS(0.983)DPEES(0.006)FAR	_GQTPLTEGS(ph)EDLDGHS(ph)DPEESFAR_	3	912.023	320
Q9CR86	Calcium-regulated heat stable protein 1	Carhsp1	0.996639	2	S	0.0387089	DRS(0.997)PS(0.994)PLRGNVVPS(0.005)PLPT(0.004)R	_DRS(ph)PS(ph)PLRGNVVPSPLPTR_	3	735.691	31
Q9CR86	Calcium-regulated heat stable protein 1	Carhsp1	0.994485	2	S	0.0387089	DRS(0.997)PS(0.994)PLRGNVVPS(0.005)PLPT(0.004)R	_DRS(ph)PS(ph)PLRGNVVPSPLPTR_	3	735.691	33
Q9CZW5	Mitochondrial import receptor subunit TOM70	Tomm70a	1	1	S	4.37997e-35	AS(1)PALGSGHHDGSGDSLEMSSLDR	_AS(ph)PALGSGHHDGSGDSLEM(ox)SSLDR_	3	827.011	94
Q9DBR0	A-kinase anchor protein 8	Akap8	1	2	S	3.37141e-92	ADS(1)DGDLS(1)ENDDGAGDLR	_ADS(ph)DGDLS(ph)ENDDGAGDLR_	2	991.338	320
Q9DBR0	A-kinase anchor protein 8	Akap8	1	2	S	3.37141e-92	ADS(1)DGDLS(1)ENDDGAGDLR	_ADS(ph)DGDLS(ph)ENDDGAGDLR_	2	991.338	325
Q9DBR1	5'-3' exoribonuclease 2	Xrn2	1	2	S	2.62126e-81	KAEDS(1)DS(1)EPEPEDNVR	_KAEDS(ph)DS(ph)EPEPEDNVR_	2	988.862	499
Q9DBR1	5'-3' exoribonuclease 2	Xrn2	1	2	S	2.62126e-81	KAEDS(1)DS(1)EPEPEDNVR	_KAEDS(ph)DS(ph)EPEPEDNVR_	2	988.862	501
Q9ERA6	Tuftelin-interacting protein 11	Tfip11	1	2	S	5.31559e-08	GAAEEADS(1)EDS(1)DAEEKPVKQEDFPK	_GAAEEADS(ph)EDS(ph)DAEEKPVKQEDFPK_	3	961.049	96
Q9ERA6	Tuftelin-interacting protein 11	Tfip11	1	2	S	5.31559e-08	GAAEEADS(1)EDS(1)DAEEKPVKQEDFPK	_GAAEEADS(ph)EDS(ph)DAEEKPVKQEDFPK_	3	961.049	99
Q9ERG0	LIM domain and actin-binding protein 1	Lima1	1	1	S	0.0284435	ELS(1)VEEQIKR	_ELS(ph)VEEQIKR_	2	655.821	735
Q9ESX5	H/ACA ribonucleoprotein complex subunit 4	Dkc1	1	3	S	4.26364e-56	KRDS(1)ES(1)ES(0.999)DET(0.001)PTVPQLK	_KRDS(ph)ES(ph)ES(ph)DETPTVPQLK_	2	1143.45	451
Q9ESX5	H/ACA ribonucleoprotein complex subunit 4	Dkc1	0.999995	3	S	4.26364e-56	KRDS(1)ES(1)ES(0.999)DET(0.001)PTVPQLK	_KRDS(ph)ES(ph)ES(ph)DETPTVPQLK_	2	1143.45	453
Q9ESX5	H/ACA ribonucleoprotein complex subunit 4	Dkc1	0.999695	3	S	4.26364e-56	KRDS(1)ES(1)ES(1)DETPTVPQLK	_KRDS(ph)ES(ph)ES(ph)DETPTVPQLK_	3	762.637	455
Q9JIK5	Nucleolar RNA helicase 2	Ddx21	0.572002	2	S	1.12601e-07	SNS(0.001)S(0.004)DAPGEES(0.572)S(0.572)S(0.572)ET(0.28)EKEIPVEQK	_SNSSDAPGEES(ph)S(ph)SETEKEIPVEQK_	3	908.698	243
Q9JIK5	Nucleolar RNA helicase 2	Ddx21	0.571813	2	S	1.12601e-07	SNS(0.001)S(0.004)DAPGEES(0.572)S(0.572)S(0.572)ET(0.28)EKEIPVEQK	_SNSSDAPGEES(ph)S(ph)SETEKEIPVEQK_	3	908.698	244
Q9JIK5	Nucleolar RNA helicase 2	Ddx21	0.57165	2	S	1.12601e-07	SNS(0.001)S(0.004)DAPGEES(0.572)S(0.572)S(0.572)ET(0.28)EKEIPVEQK	_SNSSDAPGEES(ph)S(ph)SETEKEIPVEQK_	3	908.698	245
Q9JJL3	Solute carrier organic anion transporter family member 1B2	Slco1b2	1	1;2	S	1.18246e-14	KNS(1)AS(1)LHVLK	_KNS(ph)AS(ph)LHVLK_	2	628.794	288
Q9JJL3	Solute carrier organic anion transporter family member 1B2	Slco1b2	1	2	S	1.18246e-14	KNS(1)AS(1)LHVLK	_KNS(ph)AS(ph)LHVLK_	2	628.794	290
Q9JKB3	DNA-binding protein A	Csda	0.999438	1	S	0.0319355	S(0.999)RPLNAVS(0.001)QDGK	_S(ph)RPLNAVSQDGK_	2	676.322	328
Q9JLF6	Protein-glutamine gamma-glutamyltransferase K	Tgm1	1	1	S	3.63578e-05	GS(1)GVNAAGDGTIR	_GS(ph)GVNAAGDGTIR_	2	627.777	94
Q9QYG0	Protein NDRG2	Ndrg2	1	2;3;4	S	2.35521e-39	S(1)RT(1)AS(1)LT(0.059)S(0.142)AAS(0.799)IDGSR	_S(ph)RT(ph)AS(ph)LTSAAS(ph)IDGSR_	2	950.338	328
Q9QYG0	Protein NDRG2	Ndrg2	0.999916	1;2;3;4	S	2.35521e-39	S(1)RT(1)AS(1)LTSAASIDGSR	_S(ph)RT(ph)AS(ph)LTSAASIDGSR_	2	910.355	332
Q9QYG0	Protein NDRG2	Ndrg2	0.98798	2;3;4	S	2.35521e-39	T(0.002)AS(0.998)LT(0.001)S(0.001)AAS(0.988)IDGS(0.01)R	_TAS(ph)LTSAAS(ph)IDGSR_	2	748.805	338
Q9R0Q7	Prostaglandin E synthase 3	Ptges3	0.999995	1	S	2.38927e-27	DWEDDS(1)DEDMSNFDR	_DWEDDS(ph)DEDM(ox)SNFDR_	2	986.315	113
Q9R1C7	Pre-mRNA-processing factor 40 homolog A	Prpf40a	1	3	S	2.61788e-18	HKS(1)DS(1)PES(0.986)DT(0.014)EREK	_HKS(ph)DS(ph)PES(ph)DTEREK_	3	628.887	879
Q9R1C7	Pre-mRNA-processing factor 40 homolog A	Prpf40a	1	3	S	2.61788e-18	HKS(1)DS(1)PES(0.986)DT(0.014)EREK	_HKS(ph)DS(ph)PES(ph)DTEREK_	3	628.887	881
Q9R1C7	Pre-mRNA-processing factor 40 homolog A	Prpf40a	0.985667	3	S	2.61788e-18	HKS(1)DS(1)PES(0.986)DT(0.014)EREK	_HKS(ph)DS(ph)PES(ph)DTEREK_	3	628.887	884
Q9Z1T1	AP-3 complex subunit beta-1	Ap3b1	0.999871	1	S	3.82813e-10	NFYES(1)EEEEEEKEK	_NFYES(ph)EEEEEEKEK_	2	949.864	276
Q9Z1Z0	General vesicular transport factor p115	Uso1	1	1	S	7.16931e-16	DLGHPVEEEDES(1)GDQEDDDDEIDDGDKDQDI	_DLGHPVEEEDES(ph)GDQEDDDDEIDDGDKDQDI_	3	1190.11	940
Q9Z204	Heterogeneous nuclear ribonucleoproteins C1/C2	Hnrnpc	0.999962	1	S	2.80455e-25	MESEAGADDS(1)AEEGDLLDDDDNEDRGDDQLELK	_M(ox)ESEAGADDS(ph)AEEGDLLDDDDNEDRGDDQLELK_	3	1236.48	268
Q9Z204	Heterogeneous nuclear ribonucleoproteins C1/C2	Hnrnpc	0.999997	1	S	1.42319e-12	NEKS(1)EEEQSSASVK	_NEKS(ph)EEEQSSASVK_	2	816.343	241
Q52KI8	Serine/arginine repetitive matrix protein 1	Srrm1	0.99626	2	T	6.12065e-05	HRPS(0.472)S(0.532)PAT(0.996)PPPK	_HRPSS(ph)PAT(ph)PPPK_	3	477.878	404
Q52KI8	Serine/arginine repetitive matrix protein 1	Srrm1	1	2	T	4.80307e-244	KET(1)ES(1)EAEDDNLDDLER	_KET(ph)ES(ph)EAEDDNLDDLER_	2	1084.4	913
Q52KI8	Serine/arginine repetitive matrix protein 1	Srrm1	1	2	T	0.00228558	RVS(1)RT(1)PEPK	_RVS(ph)RT(ph)PEPK_	2	615.276	745
Q52KI8	Serine/arginine repetitive matrix protein 1	Srrm1	1	2	T	0.0106876	T(1)AS(1)PPPPPKR	_T(ph)AS(ph)PPPPPKR_	2	604.267	633
D3Z4V2	Pre-mRNA 3'-end-processing factor FIP1	Fip1l1	0.825133	2	T	1.21518e-05	DHS(1)PT(0.825)PS(0.015)VFNS(0.16)DEER	_DHS(ph)PT(ph)PSVFNSDEER_	2	938.843	495
F8VQC1		Srp72	0.452369		T	4.72216e-10	AVS(0.481)S(0.508)PPT(0.452)S(0.452)PRPGS(0.081)AAT(0.019)IS(0.005)S(0.001)SASNIVPPR	_AVSS(ph)PPT(ph)SPRPGSAATISSSASNIVPPR_	3	951.118	624
E9QP00	Transformer-2 protein homolog alpha	Tra2a	0.997715	3;4	T	0.000830063	S(1)RS(1)Y(0.002)T(0.998)PEYR	_S(ph)RS(ph)YT(ph)PEYR_	2	699.73	86
Q02248	Catenin beta-1	Ctnnb1	0.445928		T	0.0103445	T(0.446)S(0.446)MGGT(0.108)QQQFVEGVR	_T(ph)SM(ox)GGTQQQFVEGVR_	2	860.872	551
F8VQ79	Myosin-IIIb	Myo3b	0.560616	1	T	0.0317789	VVMLQAY(0.439)T(0.561)K	_VVM(ox)LQAYT(ph)K_	2	574.775	1087
G5E8I8	Calcium homeostasis endoplasmic reticulum protein	Cherp	0.816811	3;4	T	0.000395241	S(0.977)RS(0.98)RS(0.981)PT(0.817)PPS(0.229)AAGLGS(0.01)NS(0.006)APPIPDS(0.001)R	_S(ph)RS(ph)RS(ph)PT(ph)PPSAAGLGSNSAPPIPDSR_	3	961.394	830
O54774	AP-3 complex subunit delta-1	Ap3d1	0.99958	2;3	T	4.61008e-12	HS(0.159)S(0.841)LPT(1)ES(1)DEDIAPAQR	_HSS(ph)LPT(ph)ES(ph)DEDIAPAQR_	2	1046.89	758
O55003	BCL2/adenovirus E1B 19 kDa protein-interacting protein 3	Bnip3	0.540979	2	T	0.0404122	AEIDS(0.017)HS(0.021)FGEKNS(0.509)T(0.541)LS(0.897)EEDY(0.015)IER	_AEIDSHSFGEKNST(ph)LS(ph)EEDYIER_	3	939.383	86
P19785	Estrogen receptor	Esr1	0.562886	3	T	0.007469	S(0.011)IILLNS(0.969)GVY(0.161)T(0.169)FLS(0.563)S(0.563)T(0.563)LK	_SIILLNS(ph)GVYTFLS(ph)S(ph)TLK_	2	1098.51	469
P26231	Catenin alpha-1	Ctnna1	0.701919	2;3	T	3.34926e-21	S(0.602)RT(0.702)S(0.702)VQT(0.994)EDDQLIAGQSAR	_SRT(ph)S(ph)VQT(ph)EDDQLIAGQSAR_	3	767.976	654
P26231	Catenin alpha-1	Ctnna1	0.999999	2;3	T	3.34926e-21	S(0.995)RT(0.667)S(0.338)VQT(1)EDDQLIAGQSAR	_S(ph)RT(ph)SVQT(ph)EDDQLIAGQSAR_	2	1151.46	658
P26645	Myristoylated alanine-rich C-kinase substrate	Marcks	0.298109		T	0.0029271	AEDGAAPS(0.106)PS(0.298)S(0.298)ET(0.298)PK	_AEDGAAPSPS(ph)SETPK_	2	762.317	143
P29699	Alpha-2-HS-glycoprotein	Ahsg	0.671535	2	T	0.0032756	HAFSPVAS(0.005)VES(0.486)AS(0.486)GET(0.672)LHS(0.351)PK	_HAFSPVASVESASGET(ph)LHS(ph)PK_	3	766.666	317
P35492	Histidine ammonia-lyase	Hal	0.619567	1	T	0.0096445	KNS(0.38)AT(0.62)IPESDDL	_KNSAT(ph)IPESDDL_	2	685.298	650
P35564	Calnexin	Canx	0.901487	1	T	1.42517e-23	QKS(0.001)DAEEDGVT(0.901)GS(0.098)QDEEDSKPK	_QKSDAEEDGVT(ph)GSQDEEDSKPK_	3	820.341	561
P70441	Na(+)/H(+) exchange regulatory cofactor NHE-RF1	Slc9a3r1	0.421388		T	0.00101556	S(0.435)AS(0.401)S(0.382)DT(0.421)S(0.36)EELNSQDSPK	_S(ph)AS(ph)SDTSEELNSQDSPK_	2	971.354	288
P70670	Nascent polypeptide-associated complex subunit alpha, muscle-specific form	Naca	0.210786		T	0.000196247	VQGEAVS(0.156)NIQENT(0.211)QT(0.211)PT(0.211)VQEES(0.211)EEEEVDET(0.001)GVEVK	_VQGEAVSNIQENT(ph)QTPTVQEESEEEEVDETGVEVK_	4	985.939	2129
P70670	Nascent polypeptide-associated complex subunit alpha, muscle-specific form	Naca	0.210786		T	0.000196247	VQGEAVS(0.156)NIQENT(0.211)QT(0.211)PT(0.211)VQEES(0.211)EEEEVDET(0.001)GVEVK	_VQGEAVSNIQENT(ph)QTPTVQEESEEEEVDETGVEVK_	4	985.939	2131
P70670	Nascent polypeptide-associated complex subunit alpha, muscle-specific form	Naca	0.210786		T	0.000196247	VQGEAVS(0.156)NIQENT(0.211)QT(0.211)PT(0.211)VQEES(0.211)EEEEVDET(0.001)GVEVK	_VQGEAVSNIQENT(ph)QTPTVQEESEEEEVDETGVEVK_	4	985.939	2133
Q0VGT4	Uncharacterized protein C4orf21 homolog		0.333333		T	0.0168377	LPLLS(0.333)S(0.333)T(0.333)DDEPK	_LPLLS(ph)STDDEPK_	2	697.826	578
Q3B7Z2	Oxysterol-binding protein 1	Osbp	0.538684	2;3	T	3.56413e-06	T(0.539)GS(0.474)NIS(0.985)GAS(0.002)SDVSLDEQYK	_T(ph)GSNIS(ph)GASSDVSLDEQYK_	2	1059.42	375
Q3UHJ0	AP2-associated protein kinase 1	Aak1	0.963494	2	T	0.0236613	VGS(0.033)LT(0.963)PPS(0.544)S(0.459)PK	_VGSLT(ph)PPS(ph)SPK_	2	615.264	618
Q569Z6	Thyroid hormone receptor-associated protein 3	Thrap3	0.500985	2	T	0.00059867	WAHDKFS(0.998)GEEGEIEDDES(0.501)GT(0.501)ENREEK	_WAHDKFS(ph)GEEGEIEDDES(ph)GTENREEK_	3	1061.74	937
Q61033	Lamina-associated polypeptide 2, isoforms alpha/zeta	Tmpo	0.666615	2	T	0.000511968	S(0.667)S(0.667)T(0.667)PLPTVSSSAENTR	_S(ph)S(ph)TPLPTVSSSAENTR_	2	897.371	159
Q80UJ7	Rab3 GTPase-activating protein catalytic subunit	Rab3gap1	0.999534	2	T	0.0360869	LS(0.002)VS(0.999)NMVHT(1)AK	_LSVS(ph)NM(ox)VHT(ph)AK_	2	681.78	386
Q8BTI8	Serine/arginine repetitive matrix protein 2	Srrm2	1	4	T	9.27977e-40	AQS(1)GT(1)DS(1)S(1)PEHKIPAPR	_AQS(ph)GT(ph)DS(ph)S(ph)PEHKIPAPR_	3	699.921	1574
Q8BTI8	Serine/arginine repetitive matrix protein 2	Srrm2	0.999976	3	T	2.44524e-05	NHS(1)GS(1)RT(1)PPVALSSSR	_NHS(ph)GS(ph)RT(ph)PPVALSSSR_	3	631.587	2056
Q8BTI8	Serine/arginine repetitive matrix protein 2	Srrm2	0.9999	3	T	0.00202478	S(1)RS(1)RT(1)PLISR	_S(ph)RS(ph)RT(ph)PLISR_	2	706.796	1836
Q8BTI8	Serine/arginine repetitive matrix protein 2	Srrm2	1	3	T	0.00725032	S(1)RS(1)RT(1)PLLPR	_S(ph)RS(ph)RT(ph)PLLPR_	2	711.806	1986
Q8BTI8	Serine/arginine repetitive matrix protein 2	Srrm2	0.999668	2	T	0.0114067	S(0.999)RT(1)PPS(0.001)APSQSR	_S(ph)RT(ph)PPSAPSQSR_	2	715.795	2362
Q8BU14	Translocation protein SEC62	Sec62	0.994829	1	T	0.0118727	EDSKKEET(0.005)PGT(0.995)PK	_EDSKKEETPGT(ph)PK_	2	763.343	158
Q8BU14	Translocation protein SEC62	Sec62	1	4	T	0.000331837	GAPADHGPEGS(1)GGERHS(1)DT(1)DS(1)DRR	_GAPADHGPEGS(ph)GGERHS(ph)DT(ph)DS(ph)DRR_	3	928.314	343
Q8BU40	NACHT, LRR and PYD domains-containing protein 4A	Nlrp4a	0.995034	1	T	0.0183601	AHMKT(0.995)KMT(0.002)HDS(0.001)S(0.001)R	_AHMKT(ph)KM(ox)THDSSR_	2	813.35	104
Q8JZQ9	Eukaryotic translation initiation factor 3 subunit B	Eif3b	0.815195	2	T	1.12652e-46	AKPAAQSEEETAT(0.815)S(0.185)PAAS(0.964)PT(0.035)PQSAER	_AKPAAQSEEETAT(ph)SPAAS(ph)PTPQSAER_	2	1386.59	74
Q91Y97	Fructose-bisphosphate aldolase B	Aldob	0.999693	1	T	2.63331e-10	GILAADESVGT(1)MGNR	_GILAADESVGT(ph)M(ox)GNR_	2	793.848	39
Q91ZX7	Prolow-density lipoprotein receptor-related protein 1	Lrp1	0.502373	2	T	0.01624	HS(0.995)LAS(0.502)T(0.502)DEKR	_HS(ph)LAS(ph)TDEKR_	3	435.174	4525
Q924Z4	Ceramide synthase 2	Cers2	1	4	T	4.01488e-73	LIEDERS(1)DREET(1)ES(1)S(1)EGEETAAGAGAK	_LIEDERS(ph)DREET(ph)ES(ph)S(ph)EGEETAAGAGAK_	3	1062.72	346
Q99MZ3	Carbohydrate-responsive element-binding protein	Mlxipl	0.857334	3	T	0.00360051	VVPS(0.831)PDS(0.445)DS(0.857)DT(0.857)DLEDPS(0.009)PR	_VVPS(ph)PDSDS(ph)DT(ph)DLEDPSPR_	2	1134.41	27
Q9QYG0	Protein NDRG2	Ndrg2	1	2;3;4	T	2.35521e-39	S(1)RT(1)AS(1)LT(0.059)S(0.142)AAS(0.799)IDGSR	_S(ph)RT(ph)AS(ph)LTSAAS(ph)IDGSR_	2	950.338	330
E9QP00	Transformer-2 protein homolog alpha	Tra2a	0.71643	4	Y	0.00221625	S(0.996)RS(0.91)RS(0.546)Y(0.716)T(0.832)PEYR	_S(ph)RS(ph)RSY(ph)T(ph)PEYR_	2	861.28	85
G3X9P5		4933421E11Rik	0.99912	2	Y	0.0194305	AKPT(0.001)QY(0.999)EMAS(1)IVK	_AKPTQY(ph)EMAS(ph)IVK_	2	813.356	19

## Sheet: Sheet3-direct detection
Phosphopeptide identifications in mouse brain.Protein and phosphorylation site identification was performed by MaxQuant with integrated Andromeda search engine (v. 1.3.0.5). Tandem mass spectra were searched against Uniprot mouse reference proteome database (44455 sequences) concatenated with reverse decoy database and protein sequences of common contaminants. Trypsin/P was specified as cleavage …
Protein	Protein name	Gene name	Localization prob	Number of Phospho (STY)	Amino acid	PEP	Phospho (STY) Probabilities	Modified sequence	Charge	m/z	Position
J3QNK8	Abl interactor 1	Abi1	0.987664	1	S	0.00765138	TNPPTQKPPS(0.988)PPVS(0.012)GR	_TNPPTQKPPS(ph)PPVSGR_	2	870.427	183
P57776	Elongation factor 1-delta	Eef1d	1	1	S	6.85381e-27	GATPAEDDEDKDIDLFGS(1)DEEEEDKEAAR	_GATPAEDDEDKDIDLFGS(ph)DEEEEDKEAAR_	3	1092.78	162
F8WJD4	Symplekin	Sympk	1	2	S	0.0213533	FVEGLIVT(1)LS(1)PR	_FVEGLIVT(ph)LS(ph)PR_	2	745.856	195
Q9ERK4	Exportin-2	Cse1l	1	2	S	0.000226093	ANIVHLMLS(1)S(1)PEQIQK	_ANIVHLMLS(ph)S(ph)PEQIQK_	2	984.457	102
Q9ERK4	Exportin-2	Cse1l	1	2	S	0.000226093	ANIVHLMLS(1)S(1)PEQIQK	_ANIVHLMLS(ph)S(ph)PEQIQK_	2	984.457	103
F8VQB6	Unconventionnal myosin-X	Myo10	0.558165	2	S	0.0640021	Y(0.981)ALFIY(0.461)ES(0.558)LKK	_Y(ph)ALFIYES(ph)LKK_	2	767.853	1679
E9Q5W5	Zinc finger ZZ-type and EF-hand domain-containing protein 1	Zzef1	0.521058	2	S	0.00733265	DLEILS(0.521)IMLY(0.437)S(0.521)S(0.521)KK	_DLEILS(ph)IM(ox)LYS(ph)SKK_	2	908.416	2370
E9Q5W5	Zinc finger ZZ-type and EF-hand domain-containing protein 1	Zzef1	0.521058	2	S	0.00733265	DLEILS(0.521)IMLY(0.437)S(0.521)S(0.521)KK	_DLEILS(ph)IM(ox)LYS(ph)SKK_	2	908.416	2375
E9Q5W5	Zinc finger ZZ-type and EF-hand domain-containing protein 1	Zzef1	0.521058	2	S	0.00733265	DLEILS(0.521)IMLY(0.437)S(0.521)S(0.521)KK	_DLEILS(ph)IM(ox)LYS(ph)SKK_	2	908.416	2376
Q8BNA6	Protocadherin Fat 3	Fat3	0.3988		S	0.0692846	LS(0.005)Y(0.369)T(0.399)IHS(0.399)S(0.399)IDAVS(0.43)MR	_LSYT(ph)IHSSIDAVS(ph)M(ox)R_	2	928.388	1498
Q8BNA6	Protocadherin Fat 3	Fat3	0.3988		S	0.0692846	LS(0.005)Y(0.369)T(0.399)IHS(0.399)S(0.399)IDAVS(0.43)MR	_LSYT(ph)IHSSIDAVS(ph)M(ox)R_	2	928.388	1499
Q8BNA6	Protocadherin Fat 3	Fat3	0.429684		S	0.0692846	LS(0.005)Y(0.369)T(0.399)IHS(0.399)S(0.399)IDAVS(0.43)MR	_LSYT(ph)IHSSIDAVS(ph)M(ox)R_	2	928.388	1504
F8WHU5	Sister chromatid cohesion protein PDS5 homolog B	Pds5b	0.99823	1	S	0.000329357	AES(0.998)PET(0.002)SAVESTQSTPQK	_AES(ph)PETSAVESTQSTPQK_	2	978.925	1359
J3QMV5			0.999996	1	S	0.00732869	KAS(1)HIQLDRWMMTSQPK	_KAS(ph)HIQLDRWM(ox)M(ox)TSQPK_	2	1085	136
O55022	Membrane-associated progesterone receptor component 1	Pgrmc1	0.999997	1	S	6.98543e-25	EGEEPTVYS(1)DDEEPKDETAR	_EGEEPTVYS(ph)DDEEPKDETAR_	3	792.651	181
P04202	Transforming growth factor beta-1	Tgfb1	1	1	S	0.0607819	LHVEINGIS(1)PK	_LHVEINGIS(ph)PK_	2	643.829	240
P07901	Heat shock protein HSP 90-alpha	Hsp90aa1	1	1	S	4.26322e-29	ESDDKPEIEDVGS(1)DEEEEEKK	_ESDDKPEIEDVGS(ph)DEEEEEKK_	3	839.341	263
P19785	Estrogen receptor	Esr1	0.9933	3	S	0.00234381	S(0.006)IILLNS(0.993)GVY(0.127)T(0.142)FLS(0.577)S(0.577)T(0.577)LK	_SIILLNS(ph)GVYTFLS(ph)S(ph)TLK_	2	1098.51	460
P19785	Estrogen receptor	Esr1	0.576808	3	S	0.00234381	S(0.006)IILLNS(0.993)GVY(0.127)T(0.142)FLS(0.577)S(0.577)T(0.577)LK	_SIILLNS(ph)GVYTFLS(ph)S(ph)TLK_	2	1098.51	467
P19785	Estrogen receptor	Esr1	0.57681	3	S	0.00234381	S(0.006)IILLNS(0.993)GVY(0.127)T(0.142)FLS(0.577)S(0.577)T(0.577)LK	_SIILLNS(ph)GVYTFLS(ph)S(ph)TLK_	2	1098.51	468
P35564	Calnexin	Canx	1	1	S	0.0180791	AEEDEILNRS(1)PR	_AEEDEILNRS(ph)PR_	2	754.841	582
Q3U3J1	2-oxoisovalerate dehydrogenase subunit alpha, mitochondrial	Bckdha	0.999983	1	S	0.0495495	S(1)VDEVNYWDKQDHPISR	_S(ph)VDEVNYWDKQDHPISR_	3	723.32	348
P53986	Monocarboxylate transporter 1	Slc16a1	0.997695	1	S	1.98325e-16	S(0.002)KES(0.998)LQEAGKSDANTDLIGGSPK	_SKES(ph)LQEAGKSDANTDLIGGSPK_	3	804.715	213
P62960	Nuclease-sensitive element-binding protein 1	Ybx1	0.498691		S	2.61377e-13	NYQQNY(0.002)QNS(0.499)ES(0.499)GEKNEGS(0.001)ESAPEGQAQQR	_NYQQNYQNS(ph)ESGEKNEGSESAPEGQAQQR_	3	1113.13	163
P62960	Nuclease-sensitive element-binding protein 1	Ybx1	0.498691		S	2.61377e-13	NYQQNY(0.002)QNS(0.499)ES(0.499)GEKNEGS(0.001)ESAPEGQAQQR	_NYQQNYQNS(ph)ESGEKNEGSESAPEGQAQQR_	3	1113.13	165
P70441	Na(+)/H(+) exchange regulatory cofactor NHE-RF1	Slc9a3r1	0.690374	1	S	0.00110286	S(0.123)AS(0.69)S(0.184)DT(0.003)SEELNSQDSPK	_SAS(ph)SDTSEELNSQDSPK_	2	931.37	285
P97855	Ras GTPase-activating protein-binding protein 1	G3bp1	0.676559	1	S	0.0372839	S(0.162)T(0.162)S(0.677)PAPADVAPAQEDLR	_STS(ph)PAPADVAPAQEDLR_	2	902.909	231
Q3UJU9	Regulator of microtubule dynamics protein 3	Fam82a2	0.998641	1	S	1.58418e-09	S(0.001)HS(0.999)LPNSLDYAQASER	_SHS(ph)LPNSLDYAQASER_	2	927.905	46
Q99L43	Phosphatidate cytidylyltransferase 2	Cds2	0.917555	1	S	8.84256e-05	EDAPPEDKESESEAKLDGET(0.041)AS(0.918)DS(0.034)ES(0.007)R	_EDAPPEDKESESEAKLDGETAS(ph)DSESR_	3	996.742	32
Q6ZQ58	La-related protein 1	Larp1	1	1	S	0.00319189	ESPRPPAAAEAPAGS(1)DGEDGGRR	_ESPRPPAAAEAPAGS(ph)DGEDGGRR_	3	777.343	81
Q8C1C8	Paraneoplastic antigen Ma1 homolog	Pnma1	0.666667	2	S	0.0508018	ALEQVFGS(0.667)VES(0.667)S(0.667)RDAQVR	_ALEQVFGS(ph)VES(ph)SRDAQVR_	3	713.315	239
Q8C1C8	Paraneoplastic antigen Ma1 homolog	Pnma1	0.666667	2	S	0.0508018	ALEQVFGS(0.667)VES(0.667)S(0.667)RDAQVR	_ALEQVFGS(ph)VES(ph)SRDAQVR_	3	713.315	242
Q8C1C8	Paraneoplastic antigen Ma1 homolog	Pnma1	0.666667	2	S	0.0508018	ALEQVFGS(0.667)VES(0.667)S(0.667)RDAQVR	_ALEQVFGS(ph)VES(ph)SRDAQVR_	3	713.315	243
Q8CH25	SAFB-like transcription modulator	Sltm	1	1	S	0.00209794	DVQDAIAQS(1)PEKEAK	_DVQDAIAQS(ph)PEKEAK_	2	854.893	289
Q8JZQ9	Eukaryotic translation initiation factor 3 subunit B	Eif3b	0.662781	1;2	S	8.69377e-06	AKPAAQS(0.049)EEET(0.049)AT(0.24)S(0.663)PAAS(0.829)PT(0.165)PQS(0.006)AER	_AKPAAQSEEETATS(ph)PAAS(ph)PTPQSAER_	3	924.73	75
Q8JZQ9	Eukaryotic translation initiation factor 3 subunit B	Eif3b	0.828979	2	S	8.69377e-06	AKPAAQS(0.049)EEET(0.049)AT(0.24)S(0.663)PAAS(0.829)PT(0.165)PQS(0.006)AER	_AKPAAQSEEETATS(ph)PAAS(ph)PTPQSAER_	3	924.73	79
Q8K2C9	3-hydroxyacyl-CoA dehydratase 3	ptplad1	1	1	S	0.00905017	WLDES(1)DAEMELR	_WLDES(ph)DAEMELR_	2	787.316	114
Q8VBT0	Thioredoxin-related transmembrane protein 1	Tmx1	1	1	S	4.18032e-52	KVEEEQEADEEDVS(1)EEEAEDREGASK	_KVEEEQEADEEDVS(ph)EEEAEDREGASK_	3	1016.08	245
Q9CY50	Translocon-associated protein subunit alpha	Ssr1	1	1	S	8.93693e-14	VEMGTSSQNDVDMSWIPQETLNQINKAS(1)PR	_VEMGTSSQNDVDMSWIPQETLNQINKAS(ph)PR_	3	1152.53	268
Q9CZW5	Mitochondrial import receptor subunit TOM70	Tomm70a	1	1	S	1.88501e-17	AS(1)PALGSGHHDGSGDSLEMSSLDR	_AS(ph)PALGSGHHDGSGDSLEMSSLDR_	3	821.68	94
Q9JI99	Sphingosine-1-phosphate phosphatase 1	Sgpp1	0.996241	1	S	0.00130422	RNS(0.996)LT(0.004)GEEGELVK	_RNS(ph)LTGEEGELVK_	2	756.359	101
Q9JJZ9	Cyclic nucleotide-gated cation channel beta-3	Cngb3	0.999997	3	S	0.00918988	TLQEILLHY(1)PT(1)S(1)KK	_TLQEILLHY(ph)PT(ph)S(ph)KK_	2	955.927	626
S4R2V5			0.315054		S	0.0659095	SAPS(0.055)MS(0.315)EPS(0.315)LIMT(0.315)RLR	_SAPSM(ox)S(ph)EPSLIM(ox)TRLR_	2	944.439	12
S4R2V5			0.315054		S	0.0659095	SAPS(0.055)MS(0.315)EPS(0.315)LIMT(0.315)RLR	_SAPSM(ox)S(ph)EPSLIM(ox)TRLR_	2	944.439	15
Q80V29	AP-5 complex subunit sigma-1	2310035K24Rik	1	1	T	0.0610248	MVHAFLIHT(1)LR	_(ac)M(ox)VHAFLIHT(ph)LR_	2	738.365	9
P39447	Tight junction protein ZO-1	Tjp1	0.999999	1	T	0.0337084	SSGIIRLHT(1)IK	_SSGIIRLHT(ph)IK_	2	652.858	693
F8WJD4	Symplekin	Sympk	1	2	T	0.0213533	FVEGLIVT(1)LS(1)PR	_FVEGLIVT(ph)LS(ph)PR_	2	745.856	193
Q8BLX7	Collagen alpha-1(XVI) chain	Col16a1	0.571165	1	T	0.0478613	LGAAPVT(0.571)QPT(0.429)RR	_LGAAPVT(ph)QPTRR_	2	673.851	85
Q8BNA6	Protocadherin Fat 3	Fat3	0.3988		T	0.0692846	LS(0.005)Y(0.369)T(0.399)IHS(0.399)S(0.399)IDAVS(0.43)MR	_LSYT(ph)IHSSIDAVS(ph)M(ox)R_	2	928.388	1495
P19785	Estrogen receptor	Esr1	0.365309		T	0.0233066	S(0.007)IILLNS(0.99)GVY(0.314)T(0.365)FLS(0.441)S(0.441)T(0.441)LK	_SIILLNS(ph)GVYT(ph)FLS(ph)STLK_	2	1098.51	464
P19785	Estrogen receptor	Esr1	0.576803	3	T	0.00234381	S(0.006)IILLNS(0.993)GVY(0.127)T(0.142)FLS(0.577)S(0.577)T(0.577)LK	_SIILLNS(ph)GVYTFLS(ph)S(ph)TLK_	2	1098.51	469
P62908	40S ribosomal protein S3	Rps3	0.941177	1	T	0.0317782	DEILPT(0.05)T(0.941)PIS(0.009)EQK	_DEILPTT(ph)PISEQK_	2	775.871	221
Q6F3F9	G-protein coupled receptor 126	Gpr126	0.934182	1	T	0.0606939	VLVS(0.028)Y(0.035)VMACS(0.004)IGNIT(0.934)IQNLK	_VLVSYVM(ox)ACSIGNIT(ph)IQNLK_	2	1131.57	748
Q8JZQ2	AFG3-like protein 2	Afg3l2	0.376754		T	0.0188375	VT(0.377)QS(0.331)AY(0.292)AQIVQFGMNEK	_VT(ph)QSAYAQIVQFGM(ox)NEK_	2	1005.46	653
Q9JJZ9	Cyclic nucleotide-gated cation channel beta-3	Cngb3	0.999997	3	T	0.00918988	TLQEILLHY(1)PT(1)S(1)KK	_TLQEILLHY(ph)PT(ph)S(ph)KK_	2	955.927	625
S4R2V5			0.315054		T	0.0659095	SAPS(0.055)MS(0.315)EPS(0.315)LIMT(0.315)RLR	_SAPSM(ox)S(ph)EPSLIM(ox)TRLR_	2	944.439	19
P10649	Glutathione S-transferase Mu 1	Gstm1	1	1	Y	0.0540264	PMILGY(1)WNVR	_(ac)PMILGY(ph)WNVR_	2	685.82	7
F8VQB6	Unconventionnal myosin-X	Myo10	0.980953	2	Y	0.0640021	Y(0.981)ALFIY(0.461)ES(0.558)LKK	_Y(ph)ALFIYES(ph)LKK_	2	767.853	1672
Q6NVF0		Ocrl	1	1	Y	0.0231519	Y(1)LMAFLRELLK	_Y(ph)LM(ox)AFLRELLK_	2	746.885	837
Q8C636	Spermatogenesis-associated protein 16	Spata16	0.88424	1	Y	0.0419481	LVT(0.116)CY(0.884)LRMR	_LVTCY(ph)LRM(ox)R_	2	625.793	239
Q9JJZ9	Cyclic nucleotide-gated cation channel beta-3	Cngb3	0.999997	3	Y	0.00918988	TLQEILLHY(1)PT(1)S(1)KK	_TLQEILLHY(ph)PT(ph)S(ph)KK_	2	955.927	623
